# Supplementary material for: ZFP560 facilitates KAP1-dependent chromatin repression to regulate exit from totipotency
Source: Research Square preprint supplement (doi:10.21203/rs.3.rs-7290036/v1), 2025-08-25
Supplement: Supplementary file 1 [file 1c79a3e635803eb3e3154643.xlsx]

## Sheet: MERVL- MERVL+
	MERVL- 1	MERVL- 2	MERVL+ 1	MERVL+ 2
Zbbx	1.69919	1.14263	2.37667	1
Zbed3	48.7982	60.5352	125.346	82.201
Zbed4	23.9099	14.7575	20.5128	12.6007
Zbed6	17.6519	12.7711	21.7973	24.5271
Zbtb1	10.4313	18.1409	10.4704	22.8674
Zbtb10	6.46144	3.75965	9.74225	16.0379
Zbtb11	28.785	24.7867	64.9856	58.55
Zbtb17	11.4188	7.98794	5.01035	6.8099
Zbtb2	13.1448	11.6123	7.64426	14.8295
Zbtb20	1.21648	1	3.96854	1.57001
Zbtb22	4.92358	3.98585	3.2332	3.11898
Zbtb24	8.55235	15.5293	16.3799	17.0135
Zbtb25	14.7897	13.5479	6.23084	10.0761
Zbtb26	11.6803	11.4425	3.85417	9.77889
Zbtb3	4.205	4.30718	4.62495	2.36578
Zbtb32	7.52165	8.29303	5.88832	2.63116
Zbtb33	8.38892	8.14571	8.54343	8.63503
Zbtb34	12.7426	10.187	5.73849	6.04732
Zbtb37	2.49527	1.66351	1.84888	5.17541
Zbtb38	2.91018	2.66458	2.4272	2.13449
Zbtb39	2.41988	4.17919	6.14509	3.75399
Zbtb4	1	1	1.07809	1
Zbtb40	4.13382	2.36413	1.57067	3.56475
Zbtb41	11.3181	7.91795	12.954	13.6422
Zbtb43	18.7475	16.4608	14.1747	18.6718
Zbtb44	52.4855	56.433	38.5629	44.7423
Zbtb45	12.4389	12.1567	8.00822	4.45629
Zbtb46	3.35832	3.47544	3.92613	1.5177
Zbtb48	5.07648	5.23404	3.36159	4.90066
Zbtb49	1.4553	2.8208	2.99763	2.90731
Zbtb5	2.82214	4.37253	2.63368	2.5877
Zbtb6	6.96861	7.60552	11.7128	15.4015
Zbtb7a	6.85949	7.4002	3.64003	4.56002
Zbtb7b	1.15373	1	1.84888	1.10321
Zbtb7c	1	1.2022	1.99128	1
Zbtb8a	33.5678	36.6816	16.4664	13.3871
Zbtb8b	5.47874	2.77169	5.88832	4.03015
Zbtb8os	45.3055	50.0834	31.5184	32.4571
Zbtb9	9.4175	8.08616	14.8174	17.2238
Zc3h10	11.0914	7.65463	11.1983	14.5085
Zc3h11a	72.4899	74.1303	192.987	196.625
Zc3h12a	2.90807	3.85631	8.95026	5.21887
Zc3h12c	1	1.07418	2.23427	3.21387
Zc3h13	26.8622	21.143	45.6505	40.2005
Zc3h14	28.1233	41.3043	35.994	40.708
Zc3h15	108.953	106.779	132.669	135.205
Zc3h18	20.4192	17.1661	56.6983	39.6735
Zc3h3	16.2079	15.5846	16.5943	13.7039
Zc3h4	15.9654	11.9618	10.1491	10.7756
Zc3h6	3.31876	3.09611	12.6117	6.97951
Zc3h7a	20.5005	25.0055	11.3053	11.0517
Zc3h7b	10.725	9.41478	3.96135	7.02157
Zc3h8	21.7262	21.3572	15.7166	18.1181
Zc3hav1	4.44804	1.66038	9.35732	7.65798
Zc3hav1l	5.17506	6.75019	2.95476	5.23989
Zc3hc1	59.2038	61.2641	88.668	102.44
Zc4h2	6.85316	9.68699	4.43226	6.09078
Zcchc10	93.7321	81.8658	78.0468	87.7423
Zcchc11	16.336	13.3604	38.948	32.3267
Zcchc12	1	2.63635	13.3823	10.6704
Zcchc14	6.53051	5.55537	5.54557	3.90258
Zcchc17	31.6113	28.6148	96.161	122.282
Zcchc18	1.53491	1	3.4259	3.88296
Zcchc2	6.79253	5.50781	5.61011	3.30963
Zcchc24	3.95142	2.73302	9.97782	12.026
Zcchc3	17.993	14.6175	11.1985	11.7316
Zcchc4	9.69428	11.0945	7.75098	6.5772
Zcchc6	6.10717	7.17554	10.4061	17.0976
Zcchc7	24.9843	28.1565	23.5749	24.3547
Zcchc8	39.7736	43.4418	36.8503	33.3921
Zcchc9	17.092	17.8683	15.3526	21.4698
Zcrb1	13.5513	14.7455	20.4913	17.8826
Zcwpw1	8.96726	11.3934	12.9118	7.25567
Zdbf2	86.919	81.7939	22.8468	16.143
Zdhhc1	1.4553	1.94304	1.60588	1
Zdhhc12	41.4501	40.6179	27.3858	25.9037
Zdhhc13	30.3708	36.4554	31.1978	35.4527
Zdhhc15	13.1723	13.7131	8.22235	3.94744
Zdhhc16	16.2369	22.0803	11.0485	15.6566
Zdhhc17	7.82744	5.8098	4.81765	3.86193
Zdhhc18	3.79642	5.29204	2.01271	1.68872
Zdhhc2	1.72575	1	2.81236	1
Zdhhc20	59.4373	47.703	31.2833	25.3304
Zdhhc21	17.3314	16.2303	9.24991	5.02822
Zdhhc24	3.46744	5.45715	5.78114	5.76977
Zdhhc3	35.0551	34.307	22.8037	20.8362
Zdhhc4	19.5119	26.5542	14.4746	16.4851
Zdhhc5	17.1342	19.0704	22.3971	21.3857
Zdhhc6	38.2563	38.5129	32.1184	45.5063
Zdhhc7	6.05075	4.62696	4.23956	6.28002
Zdhhc8	6.16831	3.41898	2.64133	2.72885
Zdhhc9	9.5725	10.0814	7.57995	5.75014
Zeb1	2.17895	1.69905	3.21177	3.90399
Zfand1	32.6984	38.6513	43.4241	30.6586
Zfand2a	8.88976	6.10445	24.6454	43.7036
Zfand2b	4.61991	6.73821	3.16889	5.38848
Zfand3	5.72389	4.23719	5.78137	8.14721
Zfand5	35.3576	38.2407	71.1757	120.023
Zfand6	87.6108	83.1016	95.6046	106.151
Zfat	1.93801	2.07416	2.48385	3.03488
Zfc3h1	19.6838	18.8964	25.9511	49.0879
Zfhx2	18.9573	13.5255	7.19432	8.31823
Zfhx3	3.16798	4.60917	2.46242	2.5877
Zfml	93.2155	92.0183	87.4473	84.6429
Zfp1	14.689	20.6775	18.9069	18.4756
Zfp101	10.9575	10.8296	17.7936	34.4532
Zfp105	15.7846	21.5459	21.3905	21.7025
Zfp106	195.123	192.013	186.392	183.556
Zfp108	2.26066	2.39236	3.0696	1.59103
Zfp109	1.69286	2.61702	1.1424	3.45822
Zfp11	3.79009	3.18543	11.7123	7.15194
Zfp110	57.7265	66.5472	65.5642	69.9241
Zfp111	10.2157	9.01302	11.8834	12.7941
Zfp113	7.00184	8.97281	20.6843	19.6237
Zfp114	3.28503	2.96657	4.08974	1.54013
Zfp119a	4.84608	3.71208	19.5919	25.1145
Zfp119b	5.69859	9.07257	18.1359	22.7188
Zfp12	6.63753	8.64993	4.62519	3.0545
Zfp120	15.9042	14.5757	26.0586	27.283
Zfp128	3.68434	2.67502	2.29116	1.27283
Zfp13	3.55126	3.3981	3.27608	1.00885
Zfp133-ps	1	1	1	1
Zfp14	2.40934	1.24974	1.1424	1.09436
Zfp142	20.2036	12.4158	18.5858	17.5434
Zfp143	32.1997	33.0986	34.9876	56.2398
Zfp146	1.28849	1.37775	1.1424	2.13449
Zfp148	28.0833	29.5327	53.2099	69.4755
Zfp157	22.527	24.1305	27.2786	20.7465
Zfp160	12.3572	12.2058	8.11517	10.7559
Zfp161	12.5749	12.6462	5.50292	6.3445
Zfp169	3.39205	1.95348	4.7107	2.07886
Zfp174	1.80747	1	2.26972	2.19617
Zfp180	9.41118	9.89232	2.26972	4.62451
Zfp182	7.43361	5.40959	9.84944	10.6298
Zfp184	10.0417	9.31656	20.4699	24.4823
Zfp185	7.58229	8.14261	12.7616	9.99196
Zfp187	36.6773	43.482	39.0124	42.9186
Zfp189	5.94374	8.66926	6.31658	3.35308
Zfp191	33.9073	28.7323	35.5009	38.8478
Zfp192	7.42729	6.85576	7.08737	6.36413
Zfp2	10.1825	10.7241	2.64133	4.60348
Zfp202	2.97714	3.92476	5.1173	5.324
Zfp207	301.212	317.485	505.088	534.524
Zfp212	7.88807	9.41014	16.0803	20.982
Zfp213	5.56889	4.43362	3.59716	4.00912
Zfp217	14.9785	9.33435	33.0602	42.8051
Zfp219	10.6079	12.2147	9.99949	16.2103
Zfp229	50.3288	46.7286	32.6107	29.5736
Zfp235	2.99401	2.35369	2.71942	3.71334
Zfp236	4.78334	5.76378	6.93732	3.7554
Zfp238	1.72575	1	1.27079	1.09436
Zfp239	11.1631	14.4404	4.79645	2.86386
Zfp248	6.76934	9.14256	5.07466	11.5648
Zfp251	3.12582	3.00834	1	1.68732
Zfp259	87.0192	88.6349	90.0376	107.304
Zfp26	21.1294	26.1822	20.513	21.4866
Zfp260	41.2698	38.9769	30.4694	27.3265
Zfp263	21.9423	20.0391	43.2307	39.7968
Zfp266	47.6853	67.9756	56.678	36.0835
Zfp27	4.35157	6.20266	7.57972	4.11566
Zfp273	3.78377	1.64994	9.95639	10.9662
Zfp275	5.44762	5.23249	2.99763	6.06695
Zfp276	2.25223	1.64108	2.26972	2.41809
Zfp277	82.0982	77.7519	188.767	138.966
Zfp28	11.2717	4.77428	7.30151	3.04425
Zfp280b	32.8935	35.2308	40.0401	29.6338
Zfp280c	27.9968	33.0244	20.8341	15.2935
Zfp280d	30.0608	29.8865	20.5768	21.9815
Zfp281	82.249	72.5539	69.0108	77.369
Zfp282	4.03102	1.72885	1	1
Zfp286	6.68762	8.76013	4.14027	5.85528
Zfp287	1.20889	1.16196	2.4272	2.2695
Zfp292	59.7173	63.1429	45.2653	58.7238
Zfp295	21.6824	19.4649	37.0001	41.6836
Zfp296	58.2279	52.3493	179.456	219.596
Zfp3	1.39888	1	1	1.27283
Zfp30	1.56232	1.50417	1.1424	1.00885
Zfp300	4.03524	1.90441	10.342	12.3666
Zfp316	2.0113	1.99215	16.8082	10.5429
Zfp317	25.481	29.0254	55.0078	62.0026
Zfp318	14.4254	10.6838	11.7128	15.9313
Zfp319	1.37443	1.41639	2.61224	1.68732
Zfp322a	34.9591	31.4147	30.4908	36.7802
Zfp324	3.46112	4.73716	1.35653	1.00885
Zfp326	10.3728	9.09345	6.68054	5.26092
Zfp329	14.9426	12.4602	13.1041	10.1195
Zfp330	51.2003	55.1894	80.2087	101.571
Zfp334	4.04157	4.84427	6.16653	7.84862
Zfp335	9.03211	8.57994	11.113	4.96514
Zfp345	14.165	15.8599	68.3253	66.3117
Zfp346	9.68795	12.9571	14.3677	22.5296
Zfp35	33.6495	39.1289	24.6025	28.005
Zfp352	2.59385	1.02665	685.863	413.324
Zfp354a	3.70205	5.31292	3.93991	3.5213
Zfp354b	1	1.04753	1.1424	1.90924
Zfp354c	6.55159	6.26646	5.69585	4.66656
Zfp358	1.84997	2.33281	1.46348	2.77835
Zfp36	7.71621	6.73821	3.21177	5.76977
Zfp362	1	1	1.84888	2.07886
Zfp365	14.5277	13.28	9.05745	7.67761
Zfp367	20.268	23.2987	26.08	21.6591
Zfp369	4.29093	3.82809	9.22871	9.94991
Zfp36l1	49.7994	43.4523	32.0748	40.2889
Zfp36l2	15.8162	12.2236	4.58231	3.45822
Zfp37	7.8691	9.25701	19.1425	22.9739
Zfp382	2.49106	2.4028	2.22685	5.06887
Zfp383	3.07151	2.59769	1.1424	2.33398
Zfp384	10.7144	9.30921	10.085	11.3279
Zfp385a	2.09934	2.25548	1.62732	1.5177
Zfp385c	1	1	1	1
Zfp386	7.22591	7.30353	30.1264	25.3696
Zfp39	7.36826	6.66977	13.3399	18.3719
Zfp395	1.72575	1.42529	1	1.44244
Zfp397	13.1132	12.2905	11.9477	11.2241
Zfp398	1.29609	2.58879	2.65511	1
Zfp40	6.42982	6.28154	7.34415	14.5954
Zfp407	11.1125	5.97646	12.0122	22.2744
Zfp408	3.06518	3.67187	2.44098	1.00885
Zfp41	8.13322	10.4457	5.46028	4.83758
Zfp410	15.4994	22.0846	29.3342	43.3167
Zfp414	13.3984	11.8636	10.8987	5.87631
Zfp418	9.34422	12.3411	11.5413	8.95324
Zfp42	728.198	657.649	394.946	291.508
Zfp420	4.66157	4.72092	7.83695	2.92694
Zfp422	13.1659	13.6713	13.5754	13.0899
Zfp423	13.8323	9.98164	3.36182	8.01824
Zfp426	6.74193	4.58829	10.7272	13.0703
Zfp428	36.5792	29.027	26.9799	22.7455
Zfp433	1.21648	1.36728	1	1.5177
Zfp438	4.10642	2.5277	4.96771	1.34808
Zfp442	3.69994	7.33485	11.1557	6.97951
Zfp444	7.65557	8.14996	12.3545	9.03734
Zfp445	36.8897	31.1185	27.9646	27.9573
Zfp446	5.18771	4.33695	8.15804	4.71002
Zfp449	3.36591	3.91741	5.5458	3.24655
Zfp451	35.9713	30.0025	33.6812	30.0866
Zfp454	6.59536	6.03755	2.4272	4.03155
Zfp455	1.23545	1.3213	3.19775	1.5177
Zfp456	3.22651	3.91432	4.00399	5.83285
Zfp457	1	1	1.46348	1.7186
Zfp458	1.64403	1.2022	1.27079	2.43167
Zfp459	23.6268	27.9706	10.4278	14.1735
Zfp46	2.25434	2.27481	1.41319	1.54013
Zfp462	20.2142	22.0103	15.3738	16.7416
Zfp467	1.21648	1.11597	1.7848	1.5177
Zfp472	16.9492	15.9937	20.0633	22.8702
Zfp473	25.6755	29.3541	20.9198	24.8664
Zfp488	50.9936	34.121	246.257	138.519
Zfp493	11.1441	6.75329	5.11753	6.28142
Zfp507	12.3319	8.60701	6.03814	11.4737
Zfp51	14.8351	16.3285	220.736	157.417
Zfp511	22.7906	16.6723	21.4122	15.2333
Zfp512	20.2036	17.5527	10.7703	13.4278
Zfp513	3.72524	3.46655	5.65275	4.19976
Zfp516	4.34313	5.6416	136.309	87.9413
Zfp518a	51.7501	61.4903	70.723	57.0823
Zfp518b	16.6081	23.3448	26.1438	26.5807
Zfp52	6.84895	7.46709	9.12152	13.1306
Zfp523	3.17009	3.94409	1	1.00885
Zfp524	1.05726	2.60813	3.16889	5.49502
Zfp526	1.15373	1	1.99128	1
Zfp53	13.9557	14.5255	15.5451	17.7144
Zfp532	46.6673	38.852	18.3505	10.5471
Zfp534	130.616	122.546	180.461	163.788
Zfp536	1.78301	1.47439	1.07809	1.00885
Zfp54	4.97789	3.78942	25.7156	17.4158
Zfp551	1	1.11443	1	1.09436
Zfp553	16.7736	16.8997	7.62259	11.712
Zfp558	2.41061	2.87145	4.53944	3.24514
Zfp560	2.49949	4.73561	500.875	500.201
Zfp563	3.3794	3.53499	5.11753	7.67901
Zfp566	23.5408	26.4246	30.2555	23.9482
Zfp568	60.807	56.438	31.283	32.9687
Zfp57	318.377	389.312	171.191	129.032
Zfp574	13.1069	18.5825	40.6613	34.3481
Zfp575	1.05726	1	1	1
Zfp579	1.39888	1.61128	1.60588	1.17847
Zfp58	7.06247	7.80504	20.1914	18.306
Zfp580	4.20922	4.07208	7.36582	3.56475
Zfp583	6.5785	6.34844	8.80021	6.55477
Zfp59	35.7505	32.5898	16.0593	8.69951
Zfp592	6.8616	14.1086	8.47935	14.3179
Zfp593	11.6302	13.0433	11.1557	12.3666
Zfp595	6.61012	5.44091	8.45769	5.85668
Zfp597	4.77069	3.69275	5.37454	5.8749
Zfp598	10.8446	12.2684	9.33542	7.86965
Zfp599	18.7259	15.4744	55.8222	67.8018
Zfp60	12.1832	12.304	12.1835	13.3843
Zfp600	24.0665	16.9221	31.4543	25.7943
Zfp605	5.54359	7.22774	15.9519	17.1607
Zfp606	4.68687	6.99264	3.36159	4.47592
Zfp607	3.92823	5.85001	2.20541	4.41143
Zfp608	1	1	2.04157	1
Zfp609	5.17084	5.35004	5.41741	5.53707
Zfp61	5.82036	6.06269	3.51165	2.90731
Zfp612	3.7147	3.24189	1.99893	5.28054
Zfp616	1.15373	1.11443	2.56937	2.54565
Zfp617	21.8143	25.6153	32.9961	41.8771
Zfp618	1	1	1	1.86718
Zfp619	3.37518	4.62696	9.63554	11.1372
Zfp62	31.1437	26.4873	16.5514	16.3575
Zfp622	40.248	34.9539	62.6737	59.4205
Zfp623	14.6785	14.1535	14.5604	23.9061
Zfp628	1.05726	1	1.46348	1.00885
Zfp637	6.46355	7.35109	6.12389	3.30963
Zfp639	32.5018	27.0808	32.0967	45.5652
Zfp64	33.9031	35.6132	15.2242	21.6801
Zfp644	26.9371	21.3557	24.1314	21.4067
Zfp646	9.20187	8.57105	10.8348	14.4469
Zfp647	4.34313	10.9843	3.76865	8.25234
Zfp652	7.05244	6.78577	3.4259	2.44052
Zfp653	1.39888	1.42529	1.86289	1.17847
Zfp654	22.9108	16.4163	22.2473	40.0113
Zfp655	65.1243	73.7065	59.269	75.2173
Zfp661	5.40334	5.18339	1.27079	4.41143
Zfp664	15.3554	17.2867	13.2541	10.8849
Zfp667	9.5725	10.059	1.22049	3.67129
Zfp668	10.1904	7.99838	6.33779	6.85195
Zfp672	1.3681	2.77478	7.79385	13.0899
Zfp677	2.57488	2.90857	17.9432	18.6466
Zfp68	15.0344	16.6499	23.9603	21.3675
Zfp687	8.6678	7.60707	6.12366	6.74682
Zfp688	4.20711	4.67761	3.0696	5.34643
Zfp689	4.90672	3.62431	13.4468	21.4502
Zfp69	2.33605	2.60658	8.45769	10.034
Zfp691	7.18846	7.34529	6.83037	3.77642
Zfp692	8.40367	5.9347	4.53944	5.11373
Zfp7	35.3909	32.1985	25.5446	22.4244
Zfp704	15.8879	12.8693	6.4021	6.28142
Zfp706	186.592	206.386	84.5783	108.712
Zfp707	4.58618	6.61176	15.8449	15.7617
Zfp708	2.98768	4.58984	10.8129	13.132
Zfp709	5.56678	4.68805	2.9762	5.98284
Zfp710	21.9234	21.5417	6.46641	8.48504
Zfp711	2.25434	2.15726	11.8836	5.77117
Zfp712	1	1.2022	1	1.85693
Zfp715	17.5613	14.2351	14.5387	14.9809
Zfp719	18.854	17.5218	15.9733	15.4688
Zfp71-rs1	69.0915	56.682	169.99	149.948
Zfp72	5.92687	8.05793	2.29116	3.20309
Zfp735	1	1.36728	2.22685	1.10321
Zfp738	8.03043	6.58354	2.50529	8.01824
Zfp74	26.5343	29.1171	38.4778	49.622
Zfp740	29.0744	25.85	13.1257	15.1926
Zfp746	9.14756	7.47018	4.518	5.13336
Zfp747	5.23991	2.88189	2.21307	1
Zfp748	13.7981	13.652	15.5665	12.811
Zfp750	5.72389	7.5162	6.93755	6.87438
Zfp758	8.08684	10.733	27.1504	24.3771
Zfp759	3.93877	4.99159	5.82401	4.62451
Zfp760	13.5682	22.397	9.78536	11.4765
Zfp763	6.23316	11.3161	6.05981	3.75399
Zfp764	3.55759	1.66351	1.57067	1
Zfp770	2.98557	4.19852	17.3867	18.4798
Zfp771	7.99087	6.72777	7.21576	5.38988
Zfp772	4.76648	3.78787	17.9863	19.4106
Zfp773	1	2.41324	3.27608	3.07693
Zfp775	3.31455	1.42529	1	1.09436
Zfp777	2.65871	2.98745	2.29116	2.97039
Zfp78	2.00919	2.20637	3.55429	3.62783
Zfp780b	14.117	12.7935	23.6176	18.5849
Zfp781	1.45193	1.3213	2.03415	5.19644
Zfp784	1	1	1.27079	1.09436
Zfp786	1.53575	1.18442	2.69799	1
Zfp787	1.45193	1.04753	1.27079	1.17847
Zfp788	14.0205	13.6013	13.2113	14.3221
Zfp790	5.22304	6.23089	4.75357	9.44106
Zfp791	1	1	1.7848	2.01577
Zfp799	10.484	17.6927	24.153	13.938
Zfp800	3.47376	2.00259	7.75144	7.57387
Zfp808	57.9649	63.368	51.3887	58.592
Zfp809	31.789	20.9659	365.228	309.627
Zfp81	5.63374	6.78886	9.22847	13.6226
Zfp810	5.38648	4.94249	2.20541	1.85693
Zfp811	1.07202	2.13793	3.39045	3.94604
Zfp819	14.058	19.0349	7.02306	6.0249
Zfp82	5.31109	9.70478	4.78267	4.21475
Zfp820	16.4193	14.0997	46.1002	61.2695
Zfp821	2.74464	2.04126	6.55192	6.25619
Zfp825	32.9536	36.8034	36.5716	37.1208
Zfp827	2.34449	2.43258	1	1
Zfp828	51.0167	58.0984	64.8785	62.3825
Zfp830	21.4183	23.7941	43.7662	38.1385
Zfp839	2.98136	3.02612	3.91848	4.92169
Zfp84	11.0039	15.1635	39.4628	28.3414
Zfp846	12.4115	10.6958	9.27135	5.89873
Zfp85-rs1	2.72988	1.43573	6.44497	6.109
Zfp862	2.82214	1.71839	1	1.54898
Zfp865	2.58753	2.66458	1.27079	4.26425
Zfp866	10.5889	7.24553	8.54343	5.40811
Zfp867	8.63196	8.19172	9.59266	15.2319
Zfp868	26.8907	31.6749	21.7547	22.3824
Zfp869	14.7518	17.779	25.8875	40.4725
Zfp87	6.84051	11.0156	5.03178	11.5844
Zfp870	15.5268	19.2448	21.0053	19.897
Zfp871	29.2531	33.6272	43.9805	43.0448
Zfp873	6.25163	10.2805	10.856	12.3666
Zfp874a	7.25964	6.87509	8.35074	6.1104
Zfp874b	6.93066	8.08306	8.1366	7.95516
Zfp879	1.29609	1.3213	1.1424	1.24295
Zfp882	8.25078	7.59508	19.0353	14.573
Zfp9	1	1	4.04686	2.33398
Zfp90	2.98346	2.73457	3.19775	2.72885
Zfp91	13.7654	8.73036	9.05721	11.0083
Zfp93	5.54359	7.90017	4.11117	2.33398
Zfp930	40.2655	40.6121	28.8637	29.3423
Zfp931	7.15052	5.59403	5.24592	5.26092
Zfp932	41.3826	50.1742	44.0234	41.3682
Zfp933	4.35578	4.66872	8.45769	9.97094
Zfp934	12.1474	13.6786	11.755	13.8301
Zfp935	22.8686	25.9842	166.564	92.0626
Zfp936	98.0115	102.204	114.254	114.829
Zfp937	9.42383	9.11123	27.921	22.9725
Zfp938	10.8631	14.314	25.8232	22.7833
Zfp939	2.34027	2.24658	8.00822	12.0932
Zfp94	4.42063	3.68966	1.46348	1.73962
Zfp940	11.85	11.2952	2.18397	5.45016
Zfp941	15.8663	12.3056	18.5001	18.3943
Zfp942	11.19	10.8714	18.7999	25.6906
Zfp943	4.43328	4.04231	7.96557	9.46068
Zfp944	8.77642	10.1541	14.7957	17.5658
Zfp945	21.4494	19.2429	21.8616	25.3486
Zfp946	11.5316	9.19901	32.3964	20.5965
Zfp947	5.94585	8.53702	9.14296	13.917
Zfp948	16.6329	16.9519	33.2319	26.285
Zfp949	5.98801	4.15096	30.4698	34.6845
Zfp951	20.4335	7.82129	40.1266	26.7097
Zfp952	5.2104	10.6661	10.9844	11.6881
Zfp953	10.6617	7.05953	7.51564	6.59963
Zfp954	5.78663	5.21471	23.2748	19.9811
Zfp955a	19.3717	24.9027	31.0477	31.1408
Zfp955b	18.3178	18.0469	17.4079	24.0772
Zfp956	5.65482	6.44047	6.4021	4.60348
Zfp957	1	1.2022	1.22049	1.86718
Zfp958	22.5518	23.8254	45.6929	42.3018
Zfp959	7.42096	9.51299	25.3947	25.3275
Zfp960	13.8255	16.4685	24.431	30.252
Zfp961	85.7297	91.0857	101.664	136.164
Zfp963	3.94298	2.95923	8.82188	12.1591
Zfp97	12.9498	18.2031	23.2536	24.6715
Zfpl1	21.0161	22.2768	20.8126	19.0097
Zfr	91.8131	73.8612	124.04	97.2646
Zfx	27.6641	21.5177	35.6298	42.1238
Zfy1	1	1	2.4272	1.34808
Zfyve1	18.9415	11.0319	15.7375	18.3298
Zfyve16	5.49349	6.12223	18.4143	22.7847
Zfyve19	9.44069	7.3944	7.60139	3.94604
Zfyve20	14.6764	10.8876	14.7738	13.4922
Zfyve21	26.8976	29.0417	21.0482	22.0866
Zfyve26	10.987	11.1807	12.5905	14.2562
Zfyve27	8.81015	6.21001	10.5345	8.5299
Zfyve28	5.32374	2.39236	2.65511	1.88821
Zfyve9	1.44771	1	1.1424	1.39154
Zhx1	9.74226	9.12322	10.2779	19.1779
Zhx3	1	1.02665	1.35653	1.39154
Zic2	1	1	1	1.34808
Zic3	85.3643	84.6611	80.8739	44.4452
Zic5	2.88826	2.1097	1.57067	1.00885
Zik1	12.2502	10.8296	10.8775	11.9208
Zkscan1	9.34211	5.6416	25.6732	26.6018
Zkscan14	2.41145	3.16455	7.06594	10.9648
Zkscan16	1	1.52662	1.1424	1
Zkscan17	13.5155	11.6107	11.5411	6.53375
Zkscan2	1.29609	1	1	1
Zkscan3	5.79717	7.23509	12.7616	12.4101
Zkscan5	16.1784	20.8217	15.2025	9.20556
Zkscan6	3.53862	5.55691	6.18797	8.46682
Zmat1	1.31717	1	1.65618	1.10321
Zmat2	87.3292	83.2791	89.546	78.9152
Zmat3	52.2383	53.3117	51.9456	51.848
Zmat4	4.65735	3.74031	6.18797	6.63888
Zmat5	17.8212	17.4592	18.1149	19.7709
Zmiz1	6.88479	5.88133	22.2256	29.7208
Zmiz2	23.3985	20.4288	16.2089	13.3661
Zmpste24	36.0546	40.0201	36.9568	45.7825
Zmym1	93.4058	100.619	109.716	96.8427
Zmym2	44.8927	54.1659	89.0953	99.7164
Zmym3	21.132	26.4529	18.778	25.2883
Zmym4	23.1264	28.8959	20.2772	18.9031
Zmym5	16.8158	18.0558	36.786	33.5378
Zmym6	9.20187	11.6316	12.162	10.5008
Zmynd11	10.7461	13.3589	8.69326	9.37517
Zmynd15	1	1.2022	1	1.54013
Zmynd19	7.71039	10.7241	4.66783	4.56002
Zmynd8	56.8762	60.9845	339.312	132.347
Znf512b	11.1336	14.0611	7.19455	8.78222
Znfx1	7.38774	6.11489	4.77478	5.77117
Znhit1	36.2312	33.9915	16.3373	18.4784
Znhit2-ps	10.4361	9.48167	17.7936	12.0288
Znhit3	64.5212	57.274	224.528	231.44
Znhit6	42.108	52.357	62.6735	62.1147
Znrd1	53.3043	55.0796	39.9125	31.187
Znrd1as	13.438	13.8693	8.80044	10.4588
Znrf1	5.28629	3.55432	3.21177	5.02822
Znrf2	13.3589	10.9874	15.8023	20.4689
Znrf3	22.516	23.9445	15.2452	11.4568
Zranb1	9.25829	9.29568	13.211	16.1052
Zranb2	101.514	106.279	107.381	97.4931
Zranb3	18.8165	20.8468	18.607	12.026
Zrsr1	5.49138	6.08202	20.2343	24.0351
Zrsr2	26.0113	22.3526	20.0204	25.9485
Zscan10	102.056	115.167	52.4811	50.4308
Zscan12	6.9412	9.85945	9.59266	13.8301
Zscan18	10.2974	9.00413	11.3486	9.6317
Zscan20	2.09301	1.38974	1	1.83731
Zscan21	19.183	23.0965	34.6661	30.0193
Zscan22	11.1167	14.1504	7.0445	8.59157
Zscan29	9.74859	9.73765	22.8894	17.6934
Zscan4a	3.62877	3.7001	4293	5173.36
Zscan4b	1	1	289.751	353.794
Zscan4c	2.0134	2.01149	3265.2	4399.22
Zscan4d	2.73621	2.52924	4509.91	4978.19
Zscan4e	1	1	410.878	478.978
Zscan4f	1.85419	1.90441	2664.37	3157.67
Zscan5b	1.07202	2.1426	4.23956	1.34808
Zswim1	51.485	51.4182	45.5221	52.106
Zswim2	1	1	38.5857	52.5966
Zswim3	9.82609	12.9973	65.9708	64.195
Zswim4	10.5826	6.1029	2.44098	9.60787
Zswim5	1.05726	1.55328	10.1705	18.6452
Zswim6	2.86979	1.75705	12.1616	10.4784
Zswim7	22.1706	21.9419	16.787	15.2319
Zufsp	11.8732	13.3739	18.4357	22.723
Zxda	5.24834	3.6912	6.44497	6.66131
Zxdc	7.91759	5.61491	4.08974	6.36553
Zzef1	8.63407	6.2858	14.4961	9.18593
Zzz3	32.7991	44.7944	90.4237	82.2094
