# Supplementary material for: ZFP560 facilitates KAP1-dependent chromatin repression to regulate exit from totipotency
Source: Research Square preprint supplement (doi:10.21203/rs.3.rs-7290036/v1), 2025-08-25
Supplement: Supplementary file 2 [file 1c7ccef0449c8ee2775e719d.xlsx]

## Sheet: KD RNA-seq
Gene ID	Normalized read count KD_Control_1	Normalized read count KD_Control_2	Normalized read count KD_Zfp560_1	Normalized read count KD_Zfp560_2
13627	309651	259157	271298	298119
434423	39576.4	34200.8	25408.2	31954.5
268373	47690.2	51220.6	26320.1	31766.1
57294	6245.71	5671.62	7753.68	10579.5
20068	16119.4	12844.2	16057.5	19654.6
19941	22352.9	19314.8	19300.2	22590.8
14433	104333	114084	80851.1	81359.9
18148	102468	88203.8	51133.1	56439.4
20084	20879	21720.5	19339.7	20562.6
66489	12640.5	12611.8	10102.8	8366.56
268449	19432.7	26849.2	14511.9	12171.2
19951	14635.5	14253.2	15213.5	18775.1
20091	45015	38939	43251.8	52016.2
19989	43074.1	36850.7	30468.3	35614.9
66475	16693.5	18121.3	18057.6	18378.1
15519	171083	145845	112355	119906
19231	67883.5	61408	47284.3	52161.4
27176	35034.2	30015.3	24274	24156.8
67671	2780.04	4042.12	2755.07	2887.49
67891	67952	54633.9	50522.4	55527.7
27207	17584.5	16228.8	17322.9	21203.1
110954	28774.2	23940.3	18754.7	18828.4
78294	24942	22484.8	21586.9	26857.7
20005	24467.2	20503.3	25015.1	30746.9
20102	38589.3	31401.6	31591.4	41046.2
619547	6698.37	6425.07	7053.89	6688.47
20044	16741	20948.2	14623	15306.8
27367	58802.6	50762.8	45205.1	45649.4
19946	11897.4	11337.3	11662.2	14443
15516	119398	100309	94381.3	98206
20116	23038.6	24745.1	22688	26240.2
19943	9934.39	12468.5	8393.77	6687.55
57808	9635.19	9436.88	10586.8	13192.2
67945	7411.6	14412.4	4213.42	2394.91
19921	22026.1	26916.5	13835.9	11577.5
20042	10521.8	17771.3	9727.23	10043.7
319195	21356	19200.1	21557.5	27278.6
22070	26316.5	25247.4	32397.8	36998
19988	38398.3	37575.5	24346.5	22604.6
19982	7361.92	7027.23	7761.94	9006.19
68193	14193.9	12871.9	11407.8	13755.6
67248	5106.31	5576.7	5631.36	6662.74
75617	13920.1	12041.3	12388.6	15239.8
100503670	38125.6	33342.5	33286.7	38710.1
13681	58040.8	49194.6	30143.2	33358.7
20088	25656.3	25164.4	29563.7	40967.1
19981	9876.98	9748.35	8537.04	8911.53
15481	63390	60677.3	82296.6	96819.3
269261	11421.6	15095.7	12479.5	15723.1
20104	37225.8	33028.1	31368.3	36779.2
20085	8263.94	11493.5	10762.2	9712.9
14694	29748	36904.1	23790.9	24941.6
65019	21956.6	20624.9	22455.6	27063.6
67115	17364.8	19589.6	17224.7	20415.6
11947	43354.5	37162.2	29430.6	30826
54127	2674.05	6587.23	3095.78	2483.13
22143	33477.5	30346.5	15108.8	15343.6
20055	8110.47	11651.7	9101.82	10523.5
68011	2571.37	2630.15	2357.42	2995.02
14325	16699	42149.6	8149.49	3199.03
20115	16217.6	22174.3	13060.9	13874.1
18999	18970.1	21016.4	9904.47	9417.9
67160	30281.2	30327.8	23070	27312.6
15382	36034.5	30812.3	22866.1	23799.3
20103	10230.3	20223.4	9622.53	10284.5
68028	4274.95	3950.16	4023.32	4919.4
57423	2989.81	2817.02	2155.38	2811.22
18477	24966.3	21639.4	22252.7	26648.2
16898	15493.4	31266.1	14223.5	11498.5
114641	16320.3	15617.7	15907.8	20689.4
12867	3200.69	5160.42	2103.03	1545.76
18746	40670.5	50615.5	27789.4	21279.4
276770	21616.5	26031.5	10388.4	10872.7
26961	11615.9	22697.4	7416.64	4668.51
17975	71122.9	62868.4	34430.1	40301.8
76846	8082.87	16237.7	6596.55	5031.52
27050	32089.7	28250.3	31911	31597.9
67097	4707.74	5456.07	7278.89	8038.48
218490	11726.3	11424.3	8255.1	9121.98
11674	21920.1	22603.4	21055.1	21810.6
22186	4797.17	11555.8	3939.75	2496
17938	15854.4	15209.4	9183.56	9648.57
19896	9974.14	13593.7	10236.9	11208.1
68052	5183.59	6280.71	5024.32	6061.71
22187	21418.9	21536.5	20405.9	14626.8
20054	4033.16	13519.5	2830.37	1427.2
16828	24160.3	25483.7	21524.4	21777.5
66483	3825.59	3536.85	2703.64	3467.38
12864	3551.78	3163.1	2608.13	2106.34
18458	42146.6	37929.5	56090.4	51680.8
51788	13440.9	14695.2	6289.82	6727.07
170930	11988	11018.9	6964.81	7788.51
11837	18223.7	38169.7	15663.5	11618.9
15510	34981.2	30213.1	16445	17604.3
19942	7215.08	13628.3	4571.58	4816.47
19899	6131.99	12227.2	4592.7	2421.56
20655	5406.61	5241.5	6074.01	7987.94
56086	39138.1	34269	17283.5	18913.9
11465	25840.7	25562.8	21554.7	23307.6
16785	24955.2	42809.1	22522.7	25315.7
66481	1518.09	6989.66	1487.74	1440.07
20643	2961.11	2723.09	2148.95	2519.89
22121	11352	26116.6	11362.8	12299.9
66477	1175.83	1233.99	1429.88	1678.09
18655	23539.8	19736	29445.2	32086.8
27425	3191.86	2972.26	2951.6	3291.85
433182	21846.2	36886.3	15233.7	12983.6
15078	11668.9	10104.3	7997.96	8038.48
22608	28218.8	25836.7	20832.9	18258.7
110323	2472.01	2327.58	2055.28	2432.59
13806	21719.2	23023.7	13684.4	9683.49
67281	8221.98	9023.57	5875.64	3788.11
22627	26001.9	24325.9	14695.5	15668.9
98758	27639.2	24566.2	18004.4	17305.7
16765	10809.9	9604.97	5364.12	6154.53
80876	4930.76	4938.94	2547.52	2601.68
629595	2730.36	1681.91	1992.83	2445.46
12857	5880.26	6629.75	5952.78	6670.09
27370	2020.44	8367.03	1766	1149.67
19241	4895.43	4420.82	3166.49	3725.62
67025	9126.22	13805.3	7703.17	8697.4
67941	2704.96	3038.51	3367.61	3743.08
18648	19832.4	19829.9	18238.5	19452.4
12631	11341	12808.6	7870.31	8698.32
19933	19970.4	18518.8	17860.2	23633.9
270106	6018.27	9953.02	5411.87	5943.16
20750	14177.3	11266.1	7786.74	8321.53
108169072	8092.81	9472.48	8285.41	9071.43
26446	5296.21	4548.37	3324.45	3239.47
11958	566.386	753.448	582.238	783.906
15528	5680.42	6363.77	3920.46	4473.68
13682	26373.9	22474.9	27013.4	25997.5
53379	28505.9	25082.3	19341.5	20407.3
12461	20677	17564.6	14000.3	14807.8
71679	3264.73	2861.52	2565.89	3108.05
15312	10774.6	9388.43	9272.64	10744
229279	47542.2	40494.4	27320.2	29118.5
17992	2287.63	2309.78	3076.49	3551.01
11740	11477.9	12858	5736.05	5820.02
18103	5157.1	8987.98	3005.78	3223.85
67204	25130.8	20949.2	18195.4	19066.5
118568718	4451.6	5774.45	6698.49	8403.32
70257	1144.92	1133.14	1237.94	1512.67
17904	4087.25	3602.11	3141.7	3556.52
66480	16964	24269.5	14156.5	14395.2
12464	18218.2	15521.8	8748.26	9951.84
14860	6973.29	5941.56	4893	5928.46
18521	15137.9	14597.3	16296.2	16680.7
55949	17185.9	18408.1	17273.4	21049.7
22154	24555.5	27701.6	16579.1	16170.7
12465	16452.8	14085.1	10518.8	11630.8
21667	16675.8	14408.5	8253.26	8311.42
12466	20152.5	17226.5	11277.4	11938.7
12462	16656	13891.3	9620.7	11224.6
22333	17375.8	16046.9	8695.91	8808.6
11946	21405.6	21988.4	13450.2	12537.9
21849	29568	28897	22159.9	23674.3
100042335	1578.82	1262.67	1420.7	1680.85
67054	18513	15420	10062.4	10442.6
107686	2157.35	2809.11	2009.36	2377.45
76808	9711.37	19912	8573.77	6453.21
22702	14811.1	14796.1	4027.91	3636.48
15526	26553.9	23216.5	16965.7	17461.9
108121	5787.52	5473.87	3154.55	3668.64
18538	9195.77	10467.2	5175.85	5728.12
14319	6091.14	5873.33	6618.59	8080.75
67530	2296.46	2140.7	2096.61	2505.19
15387	23288.1	24012.4	14821.3	14328.1
69126	1208.95	1170.71	1128.66	1284.76
12469	19427.2	16754.8	15000.4	16314.1
19384	17996.3	17245.3	10281.9	11180.5
19240	2338.41	3500.27	1900.08	2468.43
15384	19196.4	17598.2	10287.4	11296.3
13877	6627.71	6164.03	4705.66	5275.05
19177	5385.64	4684.82	3788.22	4538.93
69038	1051.07	1057	1069.88	1239.73
53605	25179.3	21673	18258.8	19150.1
17999	42864.3	35311.2	18269.8	17302.9
22146	14521.8	13612.5	8295.51	7131.43
22166	6409.11	6003.85	5236.47	5235.53
20918	8173.41	8186.08	9572.94	10909.4
20527	31334.5	26179.8	64174.7	66332.4
28080	3959.18	4365.45	3212.41	4000.4
19944	3995.62	10187.4	2920.37	1949.2
30795	5407.72	5143.62	4371.37	5082.06
26451	6802.15	7096.45	8248.67	10529
26443	5823.95	4983.43	3644.95	4486.55
66576	2009.4	1927.13	2280.28	3076.81
16341	10320.8	8260.24	6284.31	6660.9
12785	15487.8	14471.7	10562	10755
625249	3964.7	4334.8	7174.2	7915.33
11950	6707.21	6148.21	6461.55	6864
50927	21921.2	19762.7	11932.2	13413.7
21454	17636.4	16060.7	12187.5	13512
19166	5122.87	4399.07	3706.48	4127.22
23825	4025.43	3717.8	2317.93	2619.15
21402	9149.4	7521.62	7934.59	8800.33
12317	12991.6	11980	18512.2	19899.1
21648	3652.25	3120.58	4737.8	5726.28
67332	2330.68	2314.73	2072.73	2462
73830	4226.37	4356.55	3135.27	3470.14
12468	16735.4	14932.5	11234.2	12537
18643	4379.83	4928.06	2393.24	3154.92
18263	17242.2	17473.7	12238	12361.4
68713	2478.63	2134.77	1149.78	1328.87
380773	906.439	798.931	747.542	926.351
23918	10436.7	9297.47	9963.24	11864.3
16647	12918.7	10988.3	10737.4	11540.8
21991	8601.78	9308.34	5890.33	5328.35
11957	2419.01	2559.94	2006.61	2132.08
27053	11846.6	10290.2	11383	13237.3
20867	13646.3	12793.8	9063.25	9303.02
12314	6608.94	6009.78	6279.72	6768.42
97165	17061.1	16259.4	12578.7	12702.4
228033	2891.55	3207.59	3055.37	3104.38
67628	9872.56	8879.21	5232.79	6327.31
70356	11381.8	9593.11	9049.48	9720.25
66256	5326.02	4425.76	3504.45	4088.62
66373	1372.35	1265.63	1228.76	1452.02
66167	2307.5	2084.34	1855.08	2066.83
19652	7487.78	6412.22	4154.64	4406.6
66656	6213.69	5527.26	3908.52	4242.1
11532	8886.63	7449.44	5107.9	5478.15
22027	16758.6	14850.4	19204.7	20142.6
12261	5830.58	5207.89	3761.59	4147.44
11949	5725.69	5575.71	4711.17	5413.82
98221	6239.08	5150.54	4128.93	4799.93
67693	1998.36	1990.41	1212.23	1343.58
107435	8499.11	7212.14	7315.62	7401.61
11461	10729.3	11519.2	8625.2	10131
15469	6668.56	6456.71	3318.02	3205.47
21761	10357.2	8705.19	8472.75	8776.44
12567	7310.03	6788.94	3828.63	4076.68
19385	3574.97	4452.46	1833.96	1940.01
13207	21114.2	18120.3	19609.7	19753.9
66310	2539.35	2591.58	1333.45	1602.73
72931	2997.54	2947.54	2474.97	2379.29
26441	4995.9	4321.94	3510.87	4209.01
71994	10679.6	9062.14	7985.1	8667.99
15191	12032.1	10599.7	7270.62	7458.59
15081	10504.1	9642.55	17094.3	17851.5
434624	3873.07	11543	3596.28	2378.37
22218	5583.27	4660.1	4278.62	4697.92
13629	17195.8	48662.6	18598.5	14831.7
66537	2651.97	2281.11	2092.01	2384.8
22715	8958.4	7506.79	8008.98	9303.94
15254	2024.86	2508.53	1414.27	1561.38
85305	10807.7	10325.8	6375.23	7025.74
22271	5757.71	5019.03	5669.93	5145.47
12858	2332.89	2457.11	2500.68	3198.11
59069	9881.4	8850.54	6156.66	6590.14
54709	4800.48	4343.69	3164.65	3185.25
14359	11944.9	10444.4	7935.51	7959.45
20641	3151.01	2768.57	2236.2	2706.45
22630	10753.6	9084.88	6445.02	6716.96
68194	900.918	1077.77	599.686	646.975
13194	23145.7	19893.2	20874.2	22078
67270	2150.72	1857.91	1441.82	1781.02
11677	6477.56	6585.25	4129.85	4799.01
16832	5817.33	5200.96	4337.39	4826.58
18674	7119.02	6266.87	8606.83	9484.98
66181	2487.46	2162.45	1741.2	2031.91
68135	5329.33	4899.39	4570.66	5300.78
21371	1395.54	1353.63	1569.47	1787.45
17149	2204.82	1939.98	1534.57	1713.93
107272	10713.9	8837.68	4509.13	4565.58
15381	14198.3	12107.6	8370.81	9337.94
70223	13107.5	11487.6	6814.2	6566.24
50995	12687.9	10815.2	7475.42	7208.62
14228	10768	11224.6	4875.55	5163.85
22142	7274.7	7660.05	3559.55	3190.76
19045	5975.21	5882.23	4571.58	4546.29
12527	5016.88	4317	6094.21	5514.91
56347	14515.2	13540.3	9933.86	10725.6
59013	11911.8	10823.1	7169.6	7070.77
67678	1797.42	1532.6	1288.45	1614.68
26442	5016.88	4348.64	3799.24	4223.72
18813	11721.9	11025.8	7543.38	8201.14
67134	9896.85	8482.71	7476.34	8997
56351	8978.27	7845.94	7088.79	8171.74
19167	5037.86	4823.25	4060.97	4430.49
20335	2400.24	2527.31	1885.38	2177.11
55944	8626.07	8728.92	4926.98	5057.25
15388	10010.6	8941.51	5898.6	6442.18
56495	5120.66	4858.85	3069.15	2745.05
66118	4054.13	3637.71	2422.62	2677.96
12301	9509.33	8467.88	5500.03	5688.6
26444	3372.92	3199.68	2769.76	3420.51
21973	25692.7	21329.9	14597.3	15047.7
12070	3232.71	2971.27	3082.92	3409.48
68598	5583.27	4585.95	3844.24	3838.66
11848	8522.29	7614.57	8581.12	8913.37
14077	1907.83	2637.07	2282.11	2339.77
20823	8979.37	7757.94	6652.57	6864
233908	7845.5	9294.5	5929.82	6047.01
15525	22068.1	19138.8	14516.5	15236.1
19656	7168.71	6249.07	4436.58	4613.37
13205	21490.7	18739.3	11811	10853.4
14569	11921.7	10604.6	9618.86	10558.4
18102	3385.07	3415.23	1663.14	1893.14
66142	3454.62	3156.17	2876.29	3359.86
51810	28832.7	24156.8	18591.2	19425.8
67695	1048.86	1189.5	1053.35	1021.93
13167	1381.19	1326.94	1555.69	1756.21
19172	3164.26	3102.78	2828.54	3483
56431	7807.96	6806.74	5782.89	5726.28
353172	10203.8	8933.6	5369.63	6113.18
11911	5572.22	4754.04	2650.38	2440.86
12387	15273.7	13036	16747.1	15152.4
17463	6290.97	5416.52	4788.31	5264.02
217737	4955.05	4544.42	3435.57	3512.41
66091	320.179	410.342	556.524	683.735
268697	9706.95	8112.91	6911.55	7306.04
56354	7135.58	6215.45	4363.11	4946.97
53872	18164.1	15409.1	9110.09	8690.05
20826	4570.84	4846.98	3780.87	4036.24
67942	1620.77	3602.11	1327.02	1395.96
66409	7325.48	6833.43	5489.93	5693.2
68278	6452.17	5866.41	3708.32	3974.67
58865	7501.03	8046.66	2412.52	2225.81
93739	3191.86	3275.82	5210.75	5545.24
53610	10302	8829.77	7410.21	7702.13
19934	8998.14	8625.1	8953.05	10532.6
55989	7983.51	7176.54	5977.58	6240.92
19179	5620.8	4524.64	4289.64	4889.99
19184	4559.8	4291.29	2643.03	3033.61
71950	8956.19	8518.31	3864.83	3723.46
57320	2792.18	3476.54	1862.43	1874.76
75705	16509.1	15930.2	12979.1	12940.4
66152	650.295	1435.7	418.77	258.239
433759	7694.24	6584.26	5779.21	5873.32
67938	2914.74	2488.75	1711.82	1716.69
16211	25921.3	22921.8	13993	14391.5
12540	8484.75	7216.09	7968.57	8550.36
15289	11735.1	10586.8	8178.88	9021.81
18002	1247.6	1142.04	1310.49	1589.87
19173	2571.37	2545.11	1522.63	1455.69
11898	6037.04	6284.66	6824.3	7121.32
77891	3083.66	4988.38	3635.77	3923.2
73736	1838.27	1602.81	1608.96	1989.63
102631912	258.352	307.509	417.852	419.063
66197	1733.38	1825.28	1422.53	1452.94
109801	6122.05	5488.7	5430.24	5710.66
21762	11847.7	10635.3	10263.5	10911.3
68219	3580.49	3222.42	2534.66	2792.84
15201	13272	10719.3	8373.57	8301.31
67089	5861.49	4913.23	4218.93	4335.84
56397	6904.83	7195.33	7794.09	7851
19170	3232.71	3168.04	3156.39	3593.28
70572	18657.6	15902.5	8651.83	8736
56040	719.851	4015.42	613.462	355.652
56459	7291.26	6532.85	5869.21	6598.41
12417	6512.89	5565.82	4646.88	4788.9
14109	904.231	4256.68	1120.39	1194.7
19175	3152.11	4363.47	2017.63	1995.15
54124	1940.95	2116.97	1129.58	985.166
20383	9854.9	8402.62	8169.69	8551.28
19035	2808.75	2709.25	3054.45	3933.31
23808	9078.74	7973.49	5306.26	5478.15
223691	6814.3	6470.55	4219.85	4362.49
53600	3663.29	3414.25	3198.63	3531.71
20384	5257.57	4759.97	7075.01	6724.31
19716	2381.47	4896.42	1936.81	2029.15
67568	5628.53	5110	5439.42	6254.7
54484	10037.1	9894.69	14357.6	15709.4
14225	5727.9	4948.83	4353.01	5027.84
227613	5445.26	7547.33	6407.37	7187.49
66165	3942.62	3305.48	1888.14	2144.02
225363	14262.3	11906.8	10062.4	10978.4
67895	4117.06	3592.22	2711.9	3164.11
22334	5649.51	5056.6	5012.39	5255.75
67738	6862.88	5926.73	3501.69	3591.45
12336	5172.55	4848.96	4400.76	5035.19
17688	16291.6	13904.2	13241.8	13037.8
21672	4618.31	5170.31	2758.74	3248.66
245688	7140	6152.17	5616.66	5970.73
234734	14341.8	14194.9	6160.33	5736.39
13690	30454.6	25677.5	25567.9	24862.6
17215	11097	10463.2	6177.78	5788.77
11545	13628.6	16235.7	8926.42	7655.26
13039	5564.5	4599.79	5904.11	6238.16
269523	12208.8	10873.6	11644.8	12638.1
16783	7784.77	7633.35	9417.74	9280.05
23897	3430.34	3051.36	1856	2387.56
20422	747.453	1167.74	967.029	1032.04
56378	2381.47	2038.86	1865.18	2001.58
26380	13556.8	11858.4	7747.25	7500.87
26440	3780.32	3344.04	3386.9	3477.49
24015	13987.4	11968.2	8755.6	8649.61
66131	4998.11	4187.47	3911.28	4104.25
58810	4391.98	3941.26	4189.54	4330.32
18673	5908.96	5525.28	3128.84	3270.72
26893	3088.07	2703.31	1997.42	2296.58
381591	10339.6	9166.95	4191.38	4391.89
11927	810.385	1195.43	657.543	585.402
65114	11278	9278.68	8151.33	8044.91
11840	5779.79	5708.21	4815.86	4283.45
30877	6254.54	5585.6	3905.77	3892.88
68436	756.286	726.751	577.646	569.779
21399	9069.91	7559.2	5591.87	5411.98
22381	2729.25	2367.13	3166.49	3415
19052	6240.18	5111.97	4503.62	4751.22
23881	14716.1	12848.2	11283.8	10789
14113	3249.27	5164.38	2306.91	2620.98
17220	8058.58	7955.7	6179.62	6654.47
20833	9340.4	8320.55	5718.6	6999.09
74617	6672.98	5775.44	4167.5	4256.8
13669	18377.2	15273.6	12884.5	12370.6
22335	4192.14	3578.38	2673.33	2990.42
56428	4318	3666.38	3041.59	3547.33
66988	7375.17	7706.52	3585.26	3827.63
17448	3662.19	4234.93	4305.25	4077.6
17219	10071.3	8488.65	6723.28	7394.26
11737	6699.48	5850.59	4321.78	5063.68
14450	11313.4	10535.4	6228.29	5727.2
20135	6986.53	5987.04	3523.73	3399.38
104458	6798.84	5872.34	3837.81	4125.38
20382	7250.41	6911.55	5379.73	5916.51
66713	12390.9	10851.8	6740.73	6069.99
22037	3198.48	2731	2977.31	3655.78
101056073	7019.66	6011.76	4046.28	4042.67
18432	14954.6	14704.1	7536.03	7090.99
68045	4400.81	3976.86	4148.21	5157.42
66105	8785.06	7464.27	7407.46	7528.44
106529	3133.34	2925.79	2268.34	2009.85
66997	5095.27	4471.25	3439.24	3859.79
22201	13545.8	12764.1	10471.1	10935.2
67264	1381.19	1474.27	1498.76	1870.16
53817	5123.97	5189.1	2934.15	3028.1
26905	11731.8	9913.47	6724.2	6716.04
14827	8331.29	7125.12	12710	13897.1
21854	2167.28	1855.93	1722.84	1851.78
107508	16371.1	14345.2	8423.16	8906.01
14718	6162.9	5578.68	2849.66	2730.34
20393	7644.56	6520.98	3621.08	3443.49
54208	6417.94	5484.74	10626.3	11101.5
26445	1879.12	2247.49	2010.28	2570.44
13626	6134.19	5629.1	3330.88	3350.67
103573	16170.2	13614.5	11972.6	11784.3
68275	9540.24	8181.14	6466.14	6255.62
170791	10466.6	8667.61	8340.51	8543.01
11615	6217	7753.98	4892.08	4640.02
66177	863.38	903.742	1149.78	1415.26
12330	13777.6	11598.3	14646.9	14986.1
20022	951.705	884.955	843.051	995.275
67068	1295.07	1092.6	1116.72	1353.68
595136	691.146	813.763	731.011	887.753
406217	1796.32	1695.75	1677.84	2012.61
114741	14229.2	12684	8671.12	9032.84
12757	2565.85	2452.17	2157.22	1953.79
110052	7791.4	6591.18	6130.94	5869.64
22327	4372.1	3593.21	2907.51	2812.14
14751	8708.88	9178.81	12435.5	11919.4
70247	9944.33	8499.52	6256.76	6655.39
67427	10553.8	13175.4	13284	16406.9
56612	1243.18	1132.15	1186.52	1381.25
14719	6971.08	6629.75	4763.51	4965.35
66494	2612.22	3124.53	1717.33	1665.23
93762	14507.4	12027.5	13014	13127
12385	11230.6	12091.7	8294.59	8040.32
12034	3516.45	4047.06	2305.07	2325.07
27041	8056.37	8926.67	6366.96	6180.27
21815	4061.86	3314.38	3377.71	3511.49
20462	7908.43	6773.12	6587.37	6891.57
66416	731.996	1907.35	717.236	596.43
66445	3039.5	2715.18	2492.42	3153.08
20194	1119.52	912.641	1068.05	1412.5
22680	6430.08	5220.74	4188.62	3793.63
68612	2032.59	1836.16	1803.65	2070.5
17749	672.377	670.39	653.869	758.174
68051	5733.42	5400.7	4609.23	5081.14
67781	5543.52	4575.07	4027.91	4379.03
21351	3146.59	4543.43	2019.46	1559.54
80886	6231.35	5979.13	4623	5137.2
56306	7653.39	6691.05	2713.74	2720.24
110196	3037.29	2474.91	1495.08	1725.88
23996	3645.63	3561.57	2394.15	2825
68512	1067.63	1314.08	768.664	809.638
17184	13456.4	11625	9209.27	9130.25
12412	4967.2	4586.93	2631.09	2695.42
56447	4480.3	3861.17	3038.84	3742.16
407785	642.567	790.032	547.34	680.059
69010	379.799	396.499	308.568	354.733
22190	6706.1	6537.79	10929.4	7862.95
66143	2328.48	2043.8	1393.15	1439.15
66915	436.106	423.196	450.913	432.848
13204	8704.46	7503.82	5495.44	5219.91
73710	5129.49	6049.33	2502.52	1893.14
101943	12718.8	10716.4	8264.28	8534.74
13684	5201.26	4532.55	3811.18	3965.48
101739	7958.11	6918.47	4320.86	4122.63
100039786	3663.29	3167.05	2419.87	2719.32
18221	3243.75	5121.86	2953.43	3741.24
22631	9288.51	8383.84	6718.69	6908.11
26572	3942.62	3362.83	2404.26	2627.42
14828	6886.06	6137.34	14375	15414.4
68735	606.133	571.513	472.035	669.95
30057	679.001	817.718	518.871	566.103
19646	12650.4	10974.4	9993.55	10355.3
66075	5713.55	5071.43	11411.5	13178.4
104721	6599.01	5885.2	4674.43	5186.83
21915	1630.71	1526.67	1098.35	1284.76
18245	2335.1	4242.84	1834.88	1419.85
57441	2241.26	2081.37	1891.81	1924.38
20250	15649	15786.8	4873.71	4590.4
59029	3737.27	3436	3038.84	3193.52
107045	10925.8	9169.91	4975.65	5374.3
21771	5880.26	5249.41	4689.13	4919.4
66942	5874.74	5412.56	3363.94	3624.53
11799	2625.47	2909.97	2185.69	2529.08
66870	19134.6	19662.8	11439	10989.4
14661	8592.95	7571.06	6662.67	6510.19
19357	9708.06	8177.18	7727.05	7162.67
18453	7661.12	8425.36	9241.42	9530.01
19181	3438.06	3089.93	2575.07	2648.55
622117	3521.97	3016.76	2783.54	3177.9
225027	6060.22	5579.67	4835.14	4796.25
192170	3428.13	3969.94	2577.82	2785.48
78330	698.874	1012.51	830.194	869.373
13722	2412.39	2161.47	1979.98	2177.11
100040563	1144.92	956.147	1489.57	1681.77
229663	11345.4	9613.87	9131.21	9095.33
117198	9600.96	8001.18	5934.42	5865.97
19182	3913.92	3908.63	2846.9	2305.77
26987	4059.65	3576.4	2665.99	3219.25
231889	1610.83	1372.42	1389.47	1597.22
74117	6600.11	5696.34	4865.45	4740.19
12215	3218.35	4454.44	4886.57	4793.5
12974	7321.07	6017.69	5763.6	5934.89
226646	3857.61	3390.51	2634.76	2715.64
11804	9698.12	8037.76	8635.3	8670.75
13211	12763	10740.1	8031.94	7647.91
18000	8513.46	7182.47	6209.92	6107.66
104112	12102.8	11717	5354.01	4739.28
67710	1619.67	1442.62	1317.84	1670.74
66121	829.154	852.325	485.81	621.243
56200	12842.5	11579.6	7574.6	7245.38
56307	6586.86	5703.26	4396.17	4684.14
76709	3103.53	2732.98	3204.14	3506.9
23980	2511.75	3603.1	2081.91	2564.92
17210	9143.88	7646.21	12913.9	13471.6
13665	8165.68	6892.76	5218.1	5374.3
17765	11088.1	8987.98	8667.44	8614.69
50933	1784.17	1647.3	1168.15	1261.79
66357	2146.31	1982.5	1928.55	2055.8
19185	2940.13	3484.45	2619.15	2629.25
75062	4099.4	3515.1	2181.1	2281.87
67869	3360.78	3051.36	4264.84	4469.09
66413	2927.98	2529.29	2188.44	2200.08
12345	3884.11	3533.89	3761.59	4605.1
19205	7820.1	9769.11	5699.32	5197.86
192159	20371.1	18117.4	12070	11195.2
245474	7101.36	6126.46	4243.72	4290.8
17218	8814.87	10525.5	5960.13	5356.84
23997	3555.09	3477.53	2568.64	2589.74
100463512	153.465	174.025	306.731	279.376
67788	3589.32	3611.01	3141.7	3324.94
14030	6500.74	7506.79	3936.07	3480.25
20195	556.45	571.513	976.212	1378.5
71853	5160.41	4964.65	7025.42	6786.8
69912	2753.54	2238.59	1658.55	1891.3
17907	1214.47	1181.59	410.505	519.234
14004	1685.91	2454.14	1650.29	1985.04
68263	3289.01	2955.45	2167.32	2234.09
59008	6798.84	5869.38	4518.31	4460.82
68133	2608.91	2446.23	1653.96	1962.06
109672	1456.26	1345.72	987.233	1055.01
12550	11435.9	9711.76	10242.4	9584.24
66292	497.934	464.725	515.198	613.891
226414	5313.87	4879.61	3246.39	3150.33
67059	4720.99	4057.94	3093.94	3231.2
14268	22255.8	21850	16310	15164.4
27979	7316.65	7478.12	5000.45	5439.55
76936	5928.84	5649.87	3961.79	4027.97
16906	6963.35	6581.3	3510.87	3393.86
17865	8693.42	13741	4828.72	4206.26
66592	3397.21	3229.34	1695.28	1600.9
69237	6267.79	5329.51	3862.6	3998.56
13135	1073.15	1010.53	1181.01	1100.96
19047	5568.91	5430.36	5623.09	5811.75
13494	3572.76	3183.86	3387.81	3765.14
217869	9978.55	8387.79	9915.49	9795.61
81898	14753.6	12586.1	9522.43	8995.16
67003	4285.99	3913.58	3044.35	3133.79
20257	4341.19	3674.29	2657.72	3058.43
14707	618.277	862.213	609.788	605.62
17685	7523.11	6445.83	5249.32	5664.71
20016	2699.44	2498.64	1962.53	1907.84
66052	2359.39	2420.52	1319.68	1202.97
66108	2744.71	2467.99	2041.51	2207.43
13445	2547.08	2218.81	1203.05	1273.73
14388	11428.2	9301.42	9534.37	9234.1
12868	641.463	767.291	784.276	1002.63
18597	6877.23	5958.37	3729.44	3755.03
69178	5692.57	5041.77	6720.53	7186.57
192662	4218.64	6098.77	2102.12	1949.2
66249	3382.86	3019.72	1863.34	1804.91
22596	6032.62	5022	2281.2	2291.98
21781	5916.69	4876.65	3295.06	3034.53
11792	2658.59	2826.91	1721	2057.64
11739	2723.73	3193.75	2747.72	3123.68
56505	3610.3	3074.11	1932.22	2065.91
68981	2496.29	3036.53	1349.06	1471.32
17449	4372.1	3803.82	3114.14	3625.45
30960	3550.68	3044.44	3715.67	4077.6
225896	1972.97	2699.36	1931.3	2008.01
11928	8980.48	8578.62	8830.91	7762.78
14688	7443.62	6495.27	6793.08	7362.1
51792	5143.85	4964.65	3466.79	3551.93
23874	4927.45	4487.07	3122.41	3413.16
101214	4670.2	3833.49	5067.49	5156.5
53356	2000.57	2762.64	1914.77	2113.7
56449	3611.4	5306.76	2265.58	2291.06
13008	1525.82	1684.88	893.56	1086.26
83397	15599.4	14241.3	9043.05	7972.31
19324	6663.04	5774.45	6130.94	5883.43
68537	1249.8	1178.62	1162.64	1474.99
208643	13119.6	12525.8	10184.6	8889.47
66101	1361.31	1097.54	1067.13	1264.54
12763	23466.9	21463.4	7189.81	5801.64
69077	4096.09	4066.84	2774.35	2748.72
18150	1441.91	1558.31	936.723	877.644
68816	2359.39	2438.32	1134.17	948.407
23950	4141.35	3666.38	3806.59	3854.28
107734	1240.97	1192.46	793.459	902.457
19349	4724.3	4634.4	3519.14	3700.81
108143	2364.91	2003.26	2004.77	2268.09
15182	4378.73	3851.28	3329.04	3736.65
20639	2377.06	2081.37	2196.71	2378.37
52530	1801.84	1825.28	868.765	852.831
56338	6416.84	5767.53	18436	16928.9
140858	6648.69	5538.14	5554.22	5387.17
104156	8987.1	7640.28	4779.12	4326.65
50764	3542.95	2966.33	8544.38	9322.32
233726	11233.9	9539.72	6944.61	6467.91
99982	6949	5786.32	5646.97	5926.62
76614	6108.8	5300.83	4315.35	4569.26
20674	5483.9	5256.34	3416.9	3698.66
56456	4208.7	3761.31	2165.48	2133.91
71702	6802.15	5602.41	8264.28	9284.64
17254	4333.46	4728.33	2684.35	2732.18
66422	822.53	1410.98	620.809	534.857
68953	1560.05	1605.77	1207.64	1420.77
28015	4840.23	4464.33	3278.53	3225.68
22791	4340.09	3704.95	2824.86	3099.78
71805	6566.99	6030.55	5393.5	5499.29
107271	5232.17	5052.65	2828.54	2755.16
267019	12080.7	11263.2	13554	17152.2
14791	1841.58	2300.88	1381.21	1520.02
71514	13202.4	11057.5	8586.63	8737.84
66085	2982.08	2816.04	4319.03	5648.17
57296	2985.4	2515.45	3610.06	4063.81
14208	4591.81	4343.69	3746.89	4154.79
223696	1767.61	1793.64	1396.82	1494.29
22629	3590.42	3232.31	2692.62	2870.95
98415	14282.2	11944.4	10219.5	10413.2
20922	1000.28	884.955	964.274	1347.25
59025	5561.18	4642.31	3716.59	3816.6
12861	567.49	1031.29	854.071	964.948
11938	10298.7	8687.39	9802.53	9159.66
74840	1371.25	1256.73	1740.28	2157.81
11951	1204.54	2825.92	780.602	649.732
93684	2944.55	2547.09	3579.75	3378.24
56330	813.697	806.842	791.623	1001.71
52615	9902.37	8439.21	7650.82	6952.22
12859	635.942	806.842	809.072	922.675
68240	801.552	678.301	958.764	953.92
19826	3553.99	4220.1	3473.22	3490.36
18107	4648.12	4294.26	3378.63	3573.07
14105	6194.92	5168.33	4850.76	4686.89
445007	4481.41	4305.13	2410.68	2612.71
67437	6251.23	5379.93	6840.83	6934.76
67040	8886.63	8287.92	7022.67	6825.4
20813	1163.69	1171.7	1436.31	1645.01
27061	2268.86	1974.59	3080.17	3451.76
225215	2930.19	2680.57	2473.13	2959.18
22059	3587.11	4273.49	2667.82	2779.05
108147	5551.25	5547.04	2349.15	2207.43
13685	1617.46	2715.18	862.336	746.227
64934	6263.37	5276.11	4173.01	4568.34
18824	2038.11	2049.73	1485.9	1755.29
12445	2999.75	4027.29	1604.37	1574.24
67707	1839.38	1662.13	1352.74	1751.61
93687	9808.53	9074	7665.52	7463.19
69713	399.672	385.623	362.751	476.041
66136	934.04	881	657.543	783.906
19352	2500.71	2350.32	1942.32	2120.13
66973	1948.68	1706.63	1279.27	1519.1
110750	7857.64	6621.84	5423.81	5344.9
66912	3802.41	3205.61	2501.6	2805.7
66218	792.72	928.461	1561.2	1968.49
22185	4654.75	6480.44	3004.86	2565.84
70439	4610.58	3905.67	2887.31	3153.08
21917	7264.76	6270.82	3927.81	3739.41
66229	5443.05	4594.84	4047.19	4295.4
69724	2118.7	2295.94	1360.09	1627.55
24010	3993.41	3589.26	3075.57	3456.35
12447	3898.46	3460.72	1644.78	1634.9
97541	5188.01	4517.72	3432.81	3825.79
110960	5507.08	5498.59	2726.6	2584.22
13033	3804.61	3318.33	7342.26	6990.82
14775	1546.8	3437.98	1487.74	1565.05
67268	3093.59	3299.55	2467.62	2322.31
12512	1402.16	1387.25	1553.86	1522.78
110379	2331.79	2117.96	1624.57	1419.85
20624	7080.38	7063.82	4364.03	4120.79
17217	7677.68	6509.12	5782.89	5531.45
70099	8270.56	6804.76	6313.7	6356.71
56334	3888.52	3205.61	4420.05	4369.84
66092	6054.7	5144.6	6573.59	6924.65
50497	3453.52	3171.99	2741.29	2671.53
66070	1958.61	1784.74	1840.39	2140.35
107869	3448	2892.17	2077.32	2107.26
56095	6589.07	6098.77	3980.15	4426.82
54138	5195.74	4625.5	4527.49	4916.64
12626	1872.5	1603.8	1290.29	1385.85
76938	2830.83	2711.23	3072.82	3407.65
68083	3336.49	3074.11	2457.52	2698.18
11966	5603.14	5051.66	4533.92	4531.58
15331	2175.01	1995.35	2272.93	2640.28
77862	1232.14	999.653	1041.42	1239.73
107995	3377.34	2938.64	3049.86	3131.95
11429	5620.8	6583.27	3981.99	3382.83
216767	958.33	859.247	564.789	692.925
217149	1031.2	940.326	730.093	906.133
28185	7908.43	6702.92	5415.54	5683.09
15108	1363.52	1209.27	869.683	1079.82
66845	367.654	314.431	559.279	680.978
97112	3237.12	2825.92	2831.29	2940.8
233870	3114.57	2747.81	1851.41	1561.38
17089	2852.91	3233.3	2240.79	2541.95
20515	5349.2	4461.36	3856.18	4145.6
54405	422.858	567.558	538.157	468.689
14870	975.995	1167.74	907.336	850.993
66276	773.951	1272.56	426.117	453.985
66585	2871.68	2573.79	2218.75	2128.4
69207	6614.46	5633.06	5937.17	5901.81
321022	7628	6642.6	8150.41	8553.12
50849	6268.89	5734.9	7106.24	6815.29
19383	2763.48	3138.38	2714.66	2704.61
56445	5864.8	5093.19	5813.19	5877.91
13664	5741.15	4804.46	4273.11	4482.87
15929	2248.98	1938	1760.49	1962.98
627352	3115.68	2973.25	3004.86	3189.84
20018	1467.3	1401.1	1501.51	1641.33
67996	7183.06	5781.38	5683.7	6047.01
20021	2816.47	2744.84	2426.3	2391.23
66495	973.787	881	800.806	1000.79
54204	2628.78	2902.06	787.949	863.859
11843	3041.7	2646.95	2942.41	3162.27
19139	3661.09	3236.27	3273.94	3527.12
66521	1694.74	1385.28	1659.47	1891.3
12236	7369.65	6554.6	3955.36	3754.11
67705	655.816	789.044	511.524	431.929
14376	7930.51	6813.66	6327.47	6271.25
56421	6689.54	6300.48	9080.7	9267.18
17113	4804.9	4111.33	4727.7	4844.96
68153	2724.84	2364.16	2224.26	2374.69
52653	2774.52	2613.34	1968.95	2067.75
12442	2667.43	2259.35	2525.48	2916.9
28088	3611.4	3126.51	3434.65	4001.32
67920	3347.53	2845.7	2517.21	2573.2
69082	3566.14	2895.14	3412.61	3724.7
252870	9262.02	8026.89	5927.99	5967.06
16852	1054.38	956.147	765.909	866.616
66925	2096.62	2027.98	1757.73	1599.98
98238	5419.86	5899.04	3917.71	4278.86
67923	2104.35	1855.93	2108.55	2320.47
50926	5672.69	4935.97	5487.18	5600.38
22200	3728.43	3062.24	2390.48	2327.82
66242	736.412	776.19	506.014	644.218
66384	1208.95	1092.6	1075.39	1148.75
67681	1396.64	2163.44	973.457	1046.74
12321	6212.58	5276.11	7320.21	7263.76
12995	8408.57	7303.1	7078.69	7149.81
23983	2982.08	3033.57	2660.48	2775.38
109054	1228.83	1152.91	933.968	1015.49
12866	946.185	1011.52	927.539	1047.66
73723	802.656	775.201	637.339	758.174
232210	2335.1	2071.49	825.602	1134.96
56207	2809.85	2419.54	1577.74	1747.02
11758	3662.19	3276.81	4320.86	4656.57
230908	15074.9	12861	10845.8	10653
66471	6232.46	5722.05	3270.27	3402.13
20425	3881.9	3448.85	2266.5	2340.69
105148	8649.26	7825.18	5815.03	5559.94
229317	4200.97	3439.95	2719.25	2819.49
19664	10856.3	9253.96	7796.84	7068.94
72119	6322.99	5094.18	4744.23	5148.23
22273	2828.62	4109.35	2236.2	2247.87
110809	10713.9	9097.73	6892.26	6861.24
66046	1185.77	1178.62	1024.89	1360.12
56403	9094.2	8220.69	5198.81	4902.86
74600	1176.94	956.147	728.256	923.594
66882	7455.76	6223.36	8696.83	8407
192287	8795	7142.92	7334.91	7178.3
386649	2451.03	2318.68	2205.89	2278.2
11773	5483.9	4666.04	4557.8	4853.23
234594	16946.3	14808.9	12507.1	12287.9
75316	3374.03	2377.02	3360.26	3373.64
56150	2939.03	2351.31	2172.83	2278.2
56748	1377.88	1359.57	707.134	697.52
28114	8236.34	7685.76	5687.38	5636.22
14056	4791.65	4040.14	3388.73	3477.49
14175	5627.43	4748.1	4721.27	5065.52
19823	1905.62	1845.06	2902	3161.36
69902	1869.18	1716.52	1390.39	1344.49
14976	842.403	1369.46	709.889	738.875
12539	2645.34	3704.95	1797.22	1868.32
16881	5746.67	5981.11	3514.55	3394.78
54427	2784.46	3714.83	5700.23	6042.42
65111	2342.83	2372.07	2318.85	2423.4
59050	4865.62	3883.91	4721.27	5581.08
66618	1073.15	958.124	979.886	1066.96
13800	11007.5	9372.61	7115.42	7163.59
19192	4793.86	4383.25	2918.53	2970.2
235072	4473.68	3801.85	4613.82	4414.87
68202	497.934	524.052	462.851	615.729
76302	4004.45	3445.89	2857.01	2978.47
381045	1376.77	1313.1	1771.51	1970.33
19822	5344.79	4461.36	6866.55	6822.65
15366	7239.37	5972.21	3891.07	3923.2
11989	4049.72	3472.58	1169.07	1287.52
236539	3133.34	4272.5	1238.86	1030.2
20525	4456.01	5652.84	10067.9	7995.29
22044	2152.93	2119.94	843.051	682.816
16201	6638.75	7205.21	3321.69	2555.73
100041379	7365.23	6504.17	5084.02	5008.54
245841	955.018	997.675	907.336	1047.66
67300	12385.4	10856.8	10256.2	9677.97
66945	5068.77	4571.11	3966.38	3910.34
20810	2022.65	2669.7	930.294	978.733
12747	3016.31	2551.04	2343.64	2314.96
11702	5737.83	4610.66	3996.68	4254.04
106344	1791.9	1450.54	1054.27	1168.97
27214	4213.12	3613.98	3085.68	3177.9
11800	6765.72	6001.87	5509.22	5652.76
626316	4961.68	4271.51	2474.05	2494.16
78244	3557.3	3113.66	2913.02	3025.34
66225	1685.91	1370.44	1436.31	1778.26
110033	3446.9	3067.18	2081.91	2274.52
72515	6154.07	5097.14	3670.67	3670.48
70186	727.58	647.649	1554.78	1874.76
17357	2528.31	3463.68	1821.1	1905.08
66094	323.492	1072.82	210.303	158.987
72151	2773.42	2505.56	2636.6	3040.05
11931	4452.7	3914.57	3061.8	3033.61
26384	4008.87	3441.93	2249.05	2170.67
15270	2054.67	1888.56	1926.71	2054.88
110611	11729.6	10258.6	9516.92	9892.1
67872	2188.26	1967.67	1682.43	1908.76
20492	3094.7	2706.28	2950.68	2962.85
27393	1996.15	1938	1660.39	1764.48
319322	5647.3	6707.86	4201.48	4365.24
18777	4221.95	3426.11	2729.35	2636.61
66317	1864.77	1630.49	1955.18	2130.24
216873	1638.43	1646.31	672.236	518.315
21807	3125.61	3304.49	3308.84	3575.82
63959	3631.28	4378.3	2318.85	2033.74
14897	18069.2	15946	12955.2	12897.2
73693	2319.64	1999.31	2444.66	2639.36
75956	16297.1	14995.8	10999.1	10083.3
19046	7092.52	6042.41	5336.57	5026
21346	2043.63	2457.11	1921.2	2160.57
30939	887.67	776.19	1038.66	1289.35
27407	4316.9	4478.17	2879.05	2729.43
66679	2411.28	2131.8	2213.24	2205.6
20133	7004.2	5569.78	3068.23	2786.4
217127	5957.54	5024.96	4017.81	4232.91
50493	5722.38	5980.12	5935.33	5683.09
56452	2540.46	2252.43	2908.43	3371.81
17846	985.932	1097.54	639.176	828.018
66377	248.415	352.993	292.037	362.085
216443	5068.77	5007.16	2168.24	2025.47
107071	1622.98	1579.08	851.316	1122.1
69354	6818.72	5688.43	6384.41	6278.6
68184	2165.07	1902.41	2719.25	3159.52
21432	2019.34	1855.93	1002.84	966.786
53599	4733.13	4205.27	5698.4	5643.57
208606	3552.89	3060.26	2975.47	3153.08
17216	5736.73	7927.02	3552.2	3324.02
381760	2090	1866.81	1723.75	1959.3
232087	5406.61	4412.91	5991.35	6122.37
53319	4202.08	3739.55	3019.55	3300.12
22196	4166.75	4411.92	4293.31	4493.9
67684	4283.78	3950.16	3021.39	3042.8
68298	7848.81	7547.33	4873.71	4933.18
108156	5615.28	5867.4	4524.74	3821.2
67273	2008.3	1862.85	1650.29	1740.58
20200	760.702	730.706	586.829	826.18
20014	3988.99	4024.32	3965.46	4470.93
231887	3391.69	3539.82	2527.32	2830.52
20226	6159.59	6289.61	2728.44	2812.14
18140	5879.16	8330.44	3183.02	2916.9
66234	2846.28	2319.67	1702.63	1803.99
353242	946.185	1098.53	629.074	662.598
17242	867.796	1410	673.155	599.187
17294	3990.1	3348.99	2931.39	2905.87
72612	2092.21	1796.61	2327.11	2485.89
66953	3796.89	4108.37	2037.83	2086.13
20090	176.651	5662.72	178.161	93.7379
20901	4297.03	3724.72	3478.73	3765.14
19043	4123.69	3562.56	3921.38	3975.59
68183	2146.31	1950.86	1691.61	1864.65
67039	7287.94	6292.57	7558.99	7816.08
230596	2215.86	1790.67	1889.06	2204.68
13605	6992.05	5864.43	4328.21	4116.19
69956	4122.59	3468.63	3344.65	3589.61
72117	7531.94	6312.35	7720.62	7567.95
52009	4187.72	3633.75	3572.4	3323.1
11973	1653.89	1739.26	1871.61	1961.14
23837	4955.05	4605.72	3045.27	3687.94
93765	3365.2	2950.51	3392.41	3528.04
67804	3244.85	3019.72	3028.74	3145.73
12176	2621.05	2280.12	5360.44	5688.6
19069	3888.52	3513.12	2219.67	2315.88
51796	6351.7	5702.27	6048.29	5446.9
26891	2537.15	2487.76	1462.94	1373.9
67834	3783.64	3262.96	2359.26	2178.95
66055	1454.06	1293.32	1129.58	1316.01
20229	1581.02	1410.98	1183.76	1195.62
72057	3217.25	2751.76	1429.88	1589.87
227197	4337.88	3716.81	2430.89	2428.91
215449	2918.05	2467	2693.54	2491.41
216150	1414.31	2060.61	1617.22	1601.81
22145	3221.67	3462.7	1806.41	1968.49
26432	5238.3	4862.42	1520.3	1263.66
26931	4099.4	3574.43	3014.96	3208.22
70769	5974.1	5887.18	3391.49	3757.79
59046	1986.22	1885.6	2109.46	2236.84
18082	3058.26	2561.92	1322.43	1484.18
112422	4027.64	3324.27	2366.6	2183.54
19075	2171.7	1901.42	1603.45	1723.12
72584	8334.6	7010.43	7782.15	7908.9
434233	2057.98	1523.7	2048.85	2202.84
26413	6170.63	5255.35	5996.86	5820.94
66144	575.219	1029.32	542.748	523.829
50797	4813.73	4307.11	4848	4833.93
71988	4552.07	3801.85	3241.8	3037.29
11983	1335.92	2136.75	1013.86	1260.87
14194	2313.02	2154.54	1905.59	2064.99
68743	7039.53	5988.03	5259.42	4871.61
75605	10223.7	9024.56	11774.2	12187.8
21881	5101.89	7897.36	2751.39	2514.38
12848	5253.15	4391.16	3838.73	3871.74
53317	2548.19	2175.31	2111.3	2303.93
20610	4044.2	3491.37	2380.38	2479.46
67760	7073.76	5921.78	4783.72	4504.93
54401	4289.3	3668.36	3768.01	3732.05
11566	3900.67	3322.29	2949.76	2847.06
67205	1204.54	1234.98	822.847	928.189
19155	6341.76	5785.33	3502.61	3172.38
11364	3037.29	2639.04	2460.28	2609.96
115487184	271.6	312.453	216.732	207.694
68015	3439.17	3305.48	2423.54	2347.12
65972	1161.48	1188.51	1145.19	1131.29
20878	2756.85	2608.39	2071.81	2271.76
12615	1597.58	1396.15	1585.08	1780.1
108098	811.489	681.267	1333.45	1495.21
27377	7346.46	5937.6	5205.24	5238.29
20637	2759.06	3817.67	2600.78	2583.3
12340	4956.16	4322.93	3509.96	3582.26
18789	7316.65	6336.08	6232.88	5990.95
13030	2799.91	2349.33	3773.52	4163.06
12017	1786.38	1541.5	1815.59	2416.05
15502	5201.26	4740.19	6608.49	6805.18
54451	3639	3127.5	2372.11	2554.82
15507	1015.74	1576.11	1135.09	672.707
170718	2057.98	1930.09	1455.59	1461.21
54198	1825.02	1664.11	2009.36	2181.7
66446	1411	1232.02	708.052	754.498
72900	2097.73	2143.67	1885.38	2201.92
30932	2295.35	2064.57	2360.17	2372.85
51886	7807.96	7387.15	4184.03	3669.56
234664	2509.54	2177.29	2053.44	2201.92
80914	4149.08	4785.68	2576.91	2673.37
22668	4107.13	4526.62	4006.79	4247.61
67186	258.352	2356.25	357.24	233.426
83409	473.645	814.752	447.239	470.527
67832	3936	3663.42	3187.61	3415.92
56420	1848.21	1834.18	1236.11	1197.46
20024	5036.75	4715.47	3887.4	4258.64
21376	2096.62	1922.18	3622	4422.22
56486	1354.69	1165.77	1233.35	1631.22
20402	12898.8	11171.2	9606.92	9019.05
381038	1685.91	1473.28	1383.04	1649.6
60595	5965.27	7656.1	5080.34	3758.7
14312	4489.14	4079.69	6139.21	5934.89
231329	5818.43	4933.01	5969.31	5952.35
56312	525.536	528.007	268.16	272.943
100503584	3834.42	3301.52	2151.71	2070.5
30926	4059.65	3505.21	4348.41	5007.62
66694	1659.41	1501.95	1500.59	1641.33
13006	7488.88	6307.41	5632.28	5711.58
76959	1749.95	1415.93	1722.84	1827.89
71999	3443.58	2970.28	2013.95	2107.26
12050	2292.04	1908.34	2150.79	2754.24
13001	1086.4	955.158	1320.6	1284.76
20692	3830.01	3806.79	4435.66	4816.47
13382	3232.71	2792.3	2431.81	2478.54
320632	10599	8900.97	6667.26	6341.09
233406	4400.81	3822.61	4009.54	3862.55
14793	1945.37	1773.86	1725.59	2076.94
101314	1287.34	1126.22	1551.1	1813.18
53861	4337.88	3529.93	4017.81	4088.62
110391	1774.24	2108.07	1147.94	1313.25
230721	4468.16	4361.49	4860.86	4824.74
223601	2984.29	2367.13	2898.33	3032.7
99480	3413.77	2987.09	2881.8	2908.63
13619	5742.25	6732.58	4649.64	4627.16
100041953	800.448	972.956	1362.84	1448.34
224045	3653.36	3160.13	2431.81	2743.21
26754	2303.08	2142.68	1542.84	1558.62
56372	1775.34	1615.66	1799.98	1735.99
20467	1364.63	1356.6	2154.46	2476.7
104394	2724.84	2938.64	1714.57	1424.45
68585	8034.29	6890.78	5002.28	5077.47
60530	4125.9	3426.11	1898.24	1799.4
19718	1943.16	1902.41	1927.63	2146.78
227715	2225.8	1860.88	1474.88	1513.59
69639	1541.28	1400.11	1086.41	1274.65
27267	3514.24	3643.64	2669.66	2711.96
66437	841.299	979.877	648.359	679.14
170750	3436.96	4073.76	2371.19	2019.04
12028	896.502	2002.27	581.319	278.457
67973	3027.35	2437.33	2571.4	2470.27
19359	5592.1	6370.69	4426.48	4184.2
110842	1895.68	1797.6	2772.52	2752.4
18114	2711.59	2948.53	1916.61	1766.32
108168963	3615.82	3271.86	2423.54	2038.34
21877	1512.57	1678.94	477.545	305.108
98828	2118.7	1753.1	1875.28	2115.53
18412	2745.81	3084.98	3705.57	3400.29
93747	1896.79	1819.35	1093.76	1033.87
67223	1436.39	1310.13	1247.13	1270.06
104184	3250.37	2952.49	2499.76	2722.07
74107	3544.05	3071.14	2548.44	2382.96
68342	581.843	845.404	584.074	744.389
107932	9779.82	9838.33	7678.37	7283.98
66083	1677.08	1420.87	1001.01	1204.81
110826	939.561	1523.7	403.158	286.728
11637	2287.63	3291.64	1496	1498.89
78889	3523.08	2989.07	4582.6	4255.88
83701	4038.68	4052.99	3141.7	3063.94
353258	2320.75	1977.55	1676	1793.89
74493	8984.89	7858.8	7448.78	7202.19
15212	2510.65	2197.06	2270.18	2453.73
66155	1063.22	1121.27	532.646	565.184
214572	3004.17	3278.78	1574.98	1594.46
19244	4894.33	3914.57	5659.83	6005.66
74255	4638.18	4099.47	3270.27	3471.98
11886	3035.08	2425.47	2745.88	2646.72
73674	4146.87	3572.45	2380.38	2365.5
60365	3587.11	5265.23	2688.03	3052.91
24128	5024.61	4167.69	4562.39	4474.6
30058	1424.25	1299.25	826.52	867.535
223499	1912.24	1611.71	1384.88	1509
76915	868.9	793.987	431.627	499.935
100678	1424.25	1767.93	584.074	593.673
73834	1704.68	1550.4	1444.57	1541.16
13200	2774.52	2612.35	2643.03	2736.78
67199	1186.87	1639.39	1068.05	1174.48
14683	2063.5	1981.51	1749.47	1414.34
67755	2248.98	1874.72	1339.88	1302.22
67897	3629.07	3089.93	2710.07	2587.9
106298	5031.23	4695.7	3786.38	3673.24
12428	4734.24	3964.99	3501.69	3688.86
245828	671.273	530.973	457.341	717.738
57437	2328.48	2175.31	2021.3	1865.57
12331	3793.57	3876.99	3687.2	3769.73
52276	2021.55	1994.36	1661.31	1593.54
67196	1013.53	889.899	1091.93	1179.08
245128	4765.15	4195.38	4835.14	5222.67
72567	7157.66	6034.5	6009.72	6044.25
66340	550.929	515.153	509.688	617.567
66050	745.245	624.907	363.669	379.546
27681	1123.94	1089.63	945.907	1090.85
53607	1507.05	1994.36	839.377	1018.25
20733	1542.38	1477.23	1878.04	1880.27
68979	4337.88	3647.6	3004.86	3083.24
100038489	1028.99	866.168	385.709	461.337
18786	4717.68	4036.19	3484.24	3667.72
21749	2956.69	2616.3	2103.03	2314.96
21429	4630.46	5351.26	2530.07	2088.88
73078	1949.78	1734.31	1536.41	1577.92
224904	673.481	642.705	554.687	561.508
69736	1450.74	1247.84	1167.23	1178.16
68095	2049.15	1866.81	2634.76	2825.92
69186	309.139	452.86	303.976	349.219
74383	5439.74	5183.17	4186.78	3899.31
100042807	3181.92	2819.99	2757.82	2804.78
16865	2653.07	2665.74	1783.45	1603.65
19387	3986.78	4413.9	3357.51	3201.79
14300	1172.52	1360.56	1078.15	1236.05
59095	2448.82	2181.24	923.866	1000.79
52696	2413.49	2026.99	3604.55	3890.12
56360	2166.18	1774.85	1318.76	1452.94
11546	2469.8	2094.23	1466.61	1548.51
68533	1197.91	1052.06	929.376	992.518
17955	2975.46	2841.74	3070.06	3141.14
70790	14212.7	12275.7	8502.14	8159.79
20539	4794.96	5493.64	3610.06	3181.57
209318	2341.73	2508.53	1413.35	1298.54
103468	4154.6	3657.48	2982.82	2688.99
56438	2010.51	1888.56	1438.15	1605.49
320938	5575.54	4874.67	3634.85	3547.33
77721	1677.08	2006.23	1254.47	978.733
104174	5178.07	4915.21	2755.99	2745.05
22350	4111.54	4838.08	2975.47	2727.59
12450	4725.41	3992.68	13200.4	13394.4
67388	1099.65	965.046	1405.08	1754.37
73804	3732.85	3162.11	2253.65	2230.41
69305	1308.32	1218.17	657.543	632.271
67952	6915.87	6518.01	6538.69	6957.74
15115	2483.05	2723.09	1517.12	1472.24
12520	1787.48	1592.92	3213.33	3480.25
66736	1382.29	1216.2	1473.04	1607.33
12304	3211.73	2816.04	4094.03	4378.11
27058	1592.06	1381.32	1627.33	1791.13
20463	1137.19	1394.17	2184.77	2291.06
17775	2874.99	2540.17	4582.6	5101.36
67239	1725.66	1405.05	1064.37	1230.54
51797	3533.01	2865.47	2632.93	2790.08
71846	883.253	918.573	821.01	932.784
16210	4952.84	4010.48	4464.13	4345.94
67955	3981.26	3487.41	2616.4	2697.26
72124	4523.36	3903.69	2856.09	2866.36
19348	4631.56	4440.6	3684.44	3580.42
64602	8025.46	6797.84	7085.12	6553.38
67680	1125.04	1559.3	744.787	786.663
66282	1196.81	1216.2	730.093	627.676
19353	2861.74	2502.59	3685.36	4110.68
230753	5937.67	5625.15	4226.27	4063.81
66659	2109.87	1947.89	3056.29	3371.81
29858	1445.22	2055.67	1714.57	1515.43
68479	1949.78	1722.45	1510.7	1593.54
67070	4225.26	4052.99	3401.59	3131.95
231874	2122.02	1664.11	1875.28	1895.89
20364	574.115	883.966	595.095	475.122
231327	5359.14	4260.64	3045.27	2908.63
13017	3546.26	3716.81	2908.43	2659.58
212442	2299.77	1994.36	1632.84	1510.83
19935	525.536	451.871	588.666	760.012
56348	2212.55	1795.62	2028.65	1982.28
71521	8278.29	6925.39	4653.31	4511.36
66169	1153.75	1639.39	860.499	896.943
19891	2115.39	1901.42	2394.15	2711.96
16434	1278.51	1110.4	1266.41	1241.57
11933	2393.62	2073.46	3082	3312.99
70024	4562	3832.5	2542.93	2712.88
66622	4196.56	4049.04	2463.03	2291.98
56455	2441.09	2659.81	3406.18	4005
66510	1578.82	1875.71	2048.85	2110.94
56550	3089.18	2722.1	4229.95	4471.85
67141	2129.74	1858.9	1355.49	1335.3
70316	510.079	682.256	607.952	676.383
72503	10124.3	8732.87	6887.67	6880.54
27275	1816.19	1586.99	1478.55	1578.84
223921	2131.95	2058.63	2423.54	2692.67
27374	3292.33	2961.39	2286.71	2349.88
67036	3010.79	2901.07	1661.31	2017.2
11991	9395.61	8260.24	6629.61	7055.15
22123	2595.66	3804.81	2193.95	1520.02
381269	3124.51	2633.11	6242.06	6157.29
233489	4872.25	4149.89	4698.31	4607.86
21985	3057.16	2847.68	3136.19	3199.03
71973	2231.32	2463.04	1888.14	1756.21
68653	4422.89	4956.74	1995.59	2060.39
18617	788.304	648.637	807.235	879.482
104662	4325.73	3709.89	3115.98	3113.57
67811	2307.5	1925.15	1842.22	2136.67
17344	4250.66	3435.01	3754.24	3817.52
109145	1481.66	1316.06	1097.44	1287.52
16412	5454.09	4789.63	4424.64	4395.57
72170	1311.63	1244.87	725.501	836.289
11812	184.379	197.755	142.345	144.283
98386	4547.65	4266.57	2564.05	2578.71
17248	9610.9	7994.26	9053.15	8849.96
67966	1323.78	1086.67	745.705	782.068
17876	3828.9	3266.92	3065.47	2870.95
52700	1584.34	1419.88	1268.25	1402.39
13990	5153.78	4254.71	2309.66	2186.3
27057	4411.85	3595.19	5947.27	5544.32
56085	4658.06	4431.7	3510.87	3555.61
66661	4584.08	3892.81	4068.32	4063.81
225348	3920.54	3231.32	2972.72	2970.2
100040531	693.354	579.423	753.97	909.809
72198	4167.85	3355.91	2070.89	2030.07
72662	3698.62	3033.57	2178.34	2204.68
73274	4534.4	3913.58	4437.5	4522.39
66998	2362.7	1912.29	2190.28	2315.88
14678	2573.58	3258.02	2330.79	2233.17
67968	1234.35	1194.44	644.686	742.551
56258	2932.4	2440.3	1709.98	1580.68
230484	4385.35	3896.77	3213.33	2952.74
230737	2797.71	2465.02	2767.01	3086.92
18286	4528.88	4636.37	3975.56	4093.22
100041677	3634.59	3199.68	2076.4	2143.1
14375	2466.49	2109.06	1648.45	1749.77
20917	3078.14	2657.83	2033.24	2105.43
17319	370.966	1829.24	235.099	140.607
19361	2497.4	2222.77	1978.14	2063.15
12419	11208.5	9495.22	5394.42	5524.1
66523	1455.16	1402.09	1040.5	1176.32
12343	2984.29	2533.25	2844.15	2640.28
66442	1439.7	1328.92	2198.54	2310.36
66164	3695.31	3132.44	2944.25	3221.09
66589	2228.01	2752.75	1687.02	1546.67
17768	2382.58	2295.94	832.949	851.912
19188	791.616	718.84	525.3	671.788
192196	6178.36	4734.26	4743.31	4370.76
56530	956.122	1073.81	537.238	692.006
60532	3305.58	2772.53	2986.49	2809.38
12537	2985.4	2917.88	2755.99	3002.37
103554	8257.31	6940.22	6771.96	6995.42
14272	2177.22	1792.65	1317.84	1477.75
66192	607.237	545.805	522.544	682.816
28084	1072.05	1376.38	924.784	953.92
20892	499.038	411.331	307.649	327.163
12237	2368.22	2648.93	2032.32	1962.98
11972	1799.63	2066.54	2524.56	2957.34
56088	985.932	958.124	681.42	854.669
66354	2608.91	2194.09	2291.3	2700.02
115489950	3874.17	3297.57	1732.94	1604.57
269424	6919.19	6166.01	4983.92	4292.64
14679	3965.81	3155.19	3841.48	3651.18
69125	2470.9	2127.85	1825.69	1825.13
13014	391.944	777.178	475.708	532.1
13433	6674.08	7150.83	4735.96	4312.86
19744	1618.56	1465.37	1405.08	1502.56
104303	2123.12	1840.11	1867.94	1909.68
68014	3303.37	2760.66	3365.77	3363.53
14645	3323.24	3177.93	2978.23	2932.52
68693	7205.14	6845.3	6260.43	6317.2
22284	15453.6	12368.6	11572.2	11044.5
18472	6911.46	5857.51	5106.06	5165.69
234736	5480.59	4379.29	3900.26	3888.28
68236	754.078	620.952	158.876	238.021
23879	3539.64	4556.28	2176.5	1774.59
218977	3366.3	2830.87	2478.64	2439.94
66414	947.289	933.405	1303.15	1573.33
109711	4491.34	4443.56	2906.6	2648.55
58523	3268.04	2619.27	2828.54	3012.48
56353	5356.93	4662.08	5111.57	5048.06
19156	2976.56	3031.59	5961.05	5753.85
30853	1599.79	2870.42	1439.06	1322.44
71817	1072.05	959.113	1107.54	1039.39
50884	5351.41	4458.39	3624.75	3572.15
65961	1731.18	1410	1319.68	1621.11
81879	11732.9	9924.35	5950.95	5904.57
213827	4123.69	3542.79	3965.46	4011.43
69029	362.134	418.252	351.73	395.169
65113	1947.57	1602.81	2069.06	2214.79
56305	3281.29	2925.79	2596.19	2632.93
24061	4649.22	4120.23	3352	3483.92
71745	3749.41	3205.61	2246.3	2246.03
27055	3533.01	3059.27	2676.09	2598.93
67949	2071.23	1886.59	1918.45	2090.72
170707	7355.29	5851.58	8139.39	7968.64
66917	2474.21	2074.45	1887.22	1937.25
66290	1022.37	1108.42	1086.41	1050.42
60406	1139.4	1227.07	1232.43	1472.24
66590	1980.7	2561.92	1516.21	1534.73
15452	1354.69	1161.81	21.1222	22.056
57741	3231.6	3230.33	1993.75	2035.58
59027	5500.46	4564.19	3578.83	3324.94
16648	5005.84	4331.83	3070.98	2917.82
102216272	883.253	866.168	676.828	752.66
381280	5285.17	4621.54	4883.82	4945.13
15926	2531.62	2208.93	2327.11	2214.79
56031	1140.5	1059.97	984.477	1125.77
19317	5778.69	4780.73	4423.72	4259.56
110460	2283.21	1966.68	1110.29	1315.09
26908	2037	1728.38	1449.17	1452.94
69019	898.71	756.414	796.215	920.837
52633	1259.74	1128.19	842.132	910.728
67398	3385.07	2993.03	3022.31	2947.23
269951	1815.09	1813.42	1362.84	1034.79
66827	1490.49	1288.38	1361	1384.01
18393	3958.08	3258.02	2746.8	2835.11
66154	811.489	849.359	766.827	722.333
19053	1861.46	1618.63	1792.63	1844.43
244448	2140.79	1836.16	1418.86	1517.27
235323	5031.23	4168.68	2684.35	2582.39
17318	3536.33	3453.8	3986.58	4484.71
13063	3653.36	3458.74	3905.77	4407.52
12607	4830.29	4029.26	3826.79	4004.08
76479	2197.09	1970.63	2164.56	2188.14
69617	4048.61	3454.78	3332.71	3237.63
12566	2513.96	2141.69	1845.9	1842.59
18950	3372.92	2793.29	2134.26	2467.51
66427	5101.89	4371.38	3125.16	3261.53
70285	1256.43	1010.53	903.662	975.976
12453	3194.06	2645.97	4791.06	4830.26
17995	1658.31	2460.08	1282.02	1214.92
12865	98.2619	102.833	199.283	241.697
22192	1027.89	881.989	691.522	736.118
21681	1047.76	1182.58	686.93	644.218
20218	4380.94	3826.56	3804.75	3603.39
109154	6244.82	5867.81	4186.62	3757.35
66958	2436.68	2017.1	2222.42	2380.21
22195	2924.67	2651.9	3205.06	3640.15
28035	2385.89	1970.63	1727.43	1972.17
19255	1781.96	1593.91	1518.96	1597.22
67877	1061.01	984.821	1082.74	1007.22
76522	558.658	581.401	708.052	680.059
67846	2702.76	2439.31	1268.25	1238.81
11816	1257.53	5039.79	395.811	389.655
12228	1158.17	999.653	1675.08	1579.76
26395	2667.43	2173.33	3025.98	2770.78
66362	676.793	658.525	409.587	477.879
230157	2725.94	2528.3	1761.41	1741.5
16796	4054.13	4501.9	4025.15	3865.31
13000	3582.7	2932.71	4201.48	4345.03
26934	3337.59	2920.85	2416.19	2395.83
269113	2539.35	2271.22	2013.04	1896.81
11964	4865.62	3975.87	4101.38	3961.8
12925	182.171	194.789	202.038	224.236
11974	612.757	712.908	660.298	838.127
66488	1528.03	1377.37	849.479	885.915
66231	849.027	706.975	651.114	702.115
12313	4777.3	4233.94	4555.96	5078.39
213895	4988.17	4490.03	4094.03	4393.73
98258	1430.87	1121.27	1595.18	1961.14
67130	314.659	479.557	375.608	378.627
108067	1645.06	1449.55	1481.31	1718.53
56070	4952.84	4340.73	3487.92	3448.08
26992	2794.39	2528.3	3295.98	3490.36
68576	715.435	661.491	651.114	762.769
71207	3612.51	2959.41	6985.93	7251.82
11908	2526.1	2124.88	1861.51	1717.61
68833	1737.8	1432.74	1282.02	1238.81
109006	2300.87	2708.26	2608.13	2795.59
14229	4447.18	5023.97	2682.52	2408.7
108645	2073.44	1821.33	1376.62	1366.55
16551	5618.6	4627.47	3088.43	2899.44
21969	4376.52	3754.38	3133.43	3155.84
66390	1334.82	1254.76	810.908	715.9
75416	2951.17	2832.84	2816.6	2987.66
14584	3174.19	3073.12	932.131	895.105
72554	2615.53	2207.94	1878.96	2253.38
110208	2345.04	2803.18	1751.3	1643.17
434437	2129.74	1753.1	1845.9	1899.57
234023	1749.95	1430.76	1274.68	1515.43
12729	3781.43	3127.5	2365.68	2691.75
11984	905.335	3102.78	1005.6	997.113
22323	2361.6	2348.34	1447.33	1348.17
14712	3272.45	2688.48	2215.07	2287.39
56374	1510.36	1308.15	2239.87	2453.73
114128	1942.05	1564.24	1701.71	1729.56
12847	5281.86	4310.08	5870.13	6250.11
66492	2379.26	2134.77	1627.33	1954.71
52637	800.448	764.324	677.747	811.476
67511	1397.75	1480.2	1544.67	1158.86
77305	4448.28	3845.35	3002.11	2932.52
56282	819.217	1355.61	367.342	322.568
14211	6307.53	5301.82	4840.65	4424.98
235459	826.946	789.044	783.358	923.594
54394	2528.31	2165.42	1519.88	1293.95
26926	2347.25	2186.18	1304.98	1436.39
70361	3537.43	2871.41	2768.84	2600.77
80287	2547.08	2209.92	1518.04	1765.4
227290	1837.17	3549.71	994.579	674.545
106821	1160.37	1118.31	1287.53	1477.75
12315	2304.19	2942.6	1242.54	1371.15
94088	4086.15	3419.19	4240.97	3925.04
27054	3019.62	2799.23	2214.16	2044.77
20630	548.721	881.989	634.584	664.436
21788	1387.81	1157.86	1935.89	1933.57
15288	1523.61	1607.75	998.253	985.166
24068	794.928	805.853	627.237	656.165
100043034	4505.7	3960.05	3252.82	3127.35
14852	7837.77	6460.67	5186.87	5174.88
83557	3813.45	3441.93	1800.9	2027.31
108907	3177.5	2555	2165.48	2401.34
70396	2504.02	2161.47	2584.25	2892.09
66929	1543.49	1410.98	1381.21	1631.22
19663	1854.83	2095.22	1417.94	1562.3
100088	2366.01	3139.37	1420.7	1322.44
71701	2803.23	2330.55	1378.45	1361.04
68092	2064.6	1757.06	1464.78	1559.54
15368	1512.57	1959.75	2382.22	2433.51
73689	708.811	682.256	1124.99	1267.3
68349	761.806	751.47	767.745	1137.72
50799	3325.45	2901.07	1789.88	1683.61
212627	1777.55	1533.59	1419.78	1401.47
66588	1866.98	1649.28	1861.51	1794.8
22228	1503.74	1673.01	1477.63	1643.17
13885	1696.95	1398.13	1867.94	2184.46
67619	1584.34	2432.39	850.398	783.906
66271	548.721	547.782	378.363	407.116
53893	1732.28	1603.8	1289.37	1291.19
432467	1373.46	1191.48	1228.76	1419.85
70699	6558.16	5545.06	3671.59	3499.55
22042	5434.22	4548.37	11547.4	11214.5
218952	3457.94	2953.48	2509.87	2450.05
14390	5193.53	4290.3	3183.02	2899.44
70047	2384.78	1923.17	1812.83	1715.77
70465	3815.65	3338.11	4359.44	4559.15
269536	3287.91	2908.98	2802.82	2830.52
20916	2082.27	1895.48	1515.29	1746.1
66161	1077.57	953.181	930.294	1066.96
19712	7998.96	7252.68	3340.98	3204.55
12040	1337.02	1095.56	723.664	845.479
319554	2995.33	2521.38	1586.92	1518.19
66978	2675.15	2667.72	2407.01	2657.74
14911	2105.46	1822.32	1496	1428.12
13427	2589.04	2116.97	2044.26	1993.31
66949	3030.66	2544.12	2561.29	2366.42
433804	2763.48	2469.96	1487.74	1510.83
109754	2016.03	2495.67	1601.61	1484.18
52626	1812.88	1445.59	1419.78	1690.04
56551	1133.88	1710.58	901.825	1056.85
65098	1466.2	1316.06	1669.57	1822.37
67669	852.339	797.943	836.622	868.454
20768	2177.22	1839.12	1684.26	1819.62
66359	173.338	176.991	85.4071	116.713
24070	1183.56	1290.35	1021.21	1108.31
68375	564.178	602.165	611.625	554.156
240832	3588.22	3247.14	4309.84	4383.62
80986	2716	2292.97	3342.82	3177.9
56451	1255.32	1185.54	815.5	917.161
67125	1430.87	1205.32	1296.72	1519.1
106504	3399.42	2828.89	1886.3	2136.67
15982	1745.53	1442.62	1981.81	2019.96
68554	690.042	633.806	595.095	697.52
75339	3051.64	2428.43	2820.27	2928.85
13018	4163.44	3964	2990.17	2915.98
13495	1707.99	1717.5	775.092	748.065
11757	1310.53	1149.95	843.969	895.105
218975	5016.88	4826.22	4624.84	4538.93
19672	3174.19	2737.92	1934.06	2196.41
69823	3799.09	3260	4106.89	4025.21
74142	3062.68	3497.3	2544.76	1996.98
108664	2027.07	1746.18	1769.67	1724.04
11749	2700.55	2471.94	1304.07	1338.06
18759	4769.57	4194.39	3262.92	2956.42
228410	2608.91	2130.81	2068.14	2139.43
74006	4223.06	3671.33	3691.79	3676.91
67711	735.308	766.302	620.809	697.52
19821	3328.76	2794.28	2358.34	2280.04
69071	1169.21	1195.43	725.501	922.675
13046	6428.98	5822.9	5450.44	5394.52
108989	8269.46	7577.98	6379.82	6239.08
19687	5040.06	4272.5	3340.06	3381
20587	1515.88	1605.77	923.866	1139.56
13202	342.261	889.899	298.466	239.859
103136	2586.83	2330.55	1875.28	2043.85
18100	871.109	929.45	625.4	786.663
67959	1742.22	2024.03	1646.61	1776.42
54351	1264.16	1086.67	1215.9	1454.77
58875	1618.56	1445.59	1633.76	1618.36
66743	1985.11	2047.76	1572.23	1311.41
224742	3226.08	5234.58	2364.77	2431.67
66128	460.396	541.849	352.649	444.795
216987	4034.26	3344.04	2595.27	2734.94
69654	1794.11	2264.3	1450.08	1362.87
18612	2232.42	2182.23	1349.98	1534.73
21335	2201.51	1926.14	2281.2	2634.77
74022	3388.38	3078.06	3223.43	3154
407819	727.58	739.605	666.726	680.978
20397	3671.59	3565.71	2488.57	2080.39
53860	2870.57	3297.57	1173.66	1052.25
66423	563.074	552.726	479.382	567.941
235559	5379.01	4940.92	5197.89	4816.47
56399	3852.09	3747.46	3049.86	3136.54
238799	5547.94	4644.28	2084.67	1877.51
103963	3729.54	3335.14	3919.54	3845.09
18637	1590.96	1478.22	1286.62	1497.97
76055	4985.97	4207.24	5087.69	5070.11
75320	6788.91	5842.68	7232.97	6660.9
50772	4346.71	3896.77	2168.24	1967.58
111241	1427.56	4072.77	692.44	476.96
68523	412.921	475.601	496.831	407.116
326618	1992.84	1676.96	1820.18	1925.3
12036	1634.02	2232.66	631.829	427.334
70349	3345.32	2973.25	3288.63	3315.75
16592	715.435	616.008	1230.6	1454.77
74195	2857.32	2565.87	2084.67	2216.62
433702	3090.28	2594.55	2742.21	2794.67
68592	1074.26	936.371	914.682	855.588
16573	6359.42	5292.92	3973.73	3672.32
14894	1094.13	974.934	1204.88	1392.28
94061	1310.53	1072.82	1184.68	1265.46
22628	3633.48	4495.97	3676.18	3716.43
12035	8355.58	7339.69	5969.31	6531.32
69263	1001.39	912.641	904.581	945.65
208715	3551.78	3180.89	2414.36	2229.49
12235	4443.87	3605.08	4472.39	4503.09
226519	8072.94	7671.92	4993.1	4511.36
66855	3377.34	3127.5	3515.47	3367.21
97212	2654.18	2309.78	2726.6	2877.38
433693	1343.65	1171.7	1369.27	1426.29
57312	1349.17	1286.4	848.561	773.797
233871	3764.87	4643.29	2897.41	2361.83
18949	3471.19	3379.64	2547.52	2592.49
52874	3571.66	3528.94	2463.03	2598.93
66073	1059.9	832.55	967.029	1134.96
71957	2233.53	1993.37	1615.39	1712.09
70579	4685.66	4278.44	4361.27	4104.25
18024	2399.14	2067.53	1678.75	1765.4
69241	808.177	751.47	1269.17	1343.58
53382	2462.07	2346.37	2141.61	2417.89
52036	5022.4	4663.07	5021.57	4705.27
68026	2271.07	1817.37	875.193	995.275
18016	4035.36	3495.32	2018.55	1922.54
27395	3671.02	3126.51	2208.65	2637.53
67345	3888.52	3118.6	2993.84	2926.09
97820	2378.16	2080.39	3094.86	2935.28
100336	1892.37	2085.33	1409.68	1430.88
12808	5620.8	5091.21	2908.43	2860.84
52440	3244.85	2891.18	4251.99	4409.36
51798	903.127	969.99	366.424	374.032
71967	1581.02	1312.11	1269.17	1280.16
52432	1878.02	1734.31	1580.49	1671.66
56443	1390.02	1491.07	1558.45	1547.59
20719	1223.31	921.54	989.988	1162.53
76130	2501.82	2471.94	1972.63	2096.24
18020	3333.18	2765.61	3215.16	3286.34
24075	485.789	510.209	500.504	616.648
217337	2405.76	2501.6	1733.86	1618.36
13663	2017.13	1776.83	3127.92	3535.39
75786	6935.75	5701.29	4227.19	4350.54
414077	421.753	366.836	300.302	294.08
71819	3309.99	2720.12	2868.94	2863.6
18747	2117.6	1915.26	2168.24	2112.78
448850	743.037	677.312	663.971	662.598
16468	6168.42	6569.43	10168	10562.1
66405	527.744	470.658	312.241	340.029
17420	1352.48	1061.95	1042.33	1103.72
21982	1709.1	1528.65	1579.57	1553.11
98053	1542.38	1762	1621.82	1647.76
18518	1300.59	1134.13	1267.33	1271.89
56196	1794.11	1465.37	1552.02	1665.23
56321	1603.1	1430.76	693.359	839.965
108911	3705.25	10521.6	1914.77	1266.38
60321	2515.06	2991.05	2388.64	2310.36
18023	3931.58	5224.69	2256.4	1993.31
26894	1537.96	1878.68	1038.66	1027.44
14479	3111.26	2713.2	2645.78	2693.58
54392	3636.8	2957.43	3162.82	3263.36
68196	917.479	911.652	1181.92	1445.58
59015	6094.45	5082.31	3461.28	3089.67
72183	1685.91	1717.5	1518.96	1595.38
22352	1629.6	1664.11	1296.72	1424.45
16008	729.788	3397.44	926.621	680.059
20466	4955.05	4219.11	3649.55	3485.76
11534	1578.82	1420.87	644.686	577.131
57785	556.45	800.909	291.119	378.627
66865	2954.48	2540.17	3202.31	3193.52
192176	8574.18	7826.17	7277.97	6682.04
13244	1575.5	1499.97	1453.76	1456.61
26965	2907.01	2377.02	1730.18	1737.83
338467	4100.5	3397.44	2874.45	2492.32
52398	5004.73	4395.11	3503.53	3348.83
12388	5717.96	4752.06	4701.06	4686.89
17993	1296.17	1269.59	1301.31	1668.9
56426	1707.99	1431.75	1590.59	1567.81
12449	2954.48	3462.7	2667.82	2712.88
67242	862.276	788.055	667.645	694.763
21665	3045.02	2617.29	2142.52	1897.73
74164	4212.01	3573.44	3359.35	3606.15
58184	2920.26	2492.71	2400.58	2426.16
107732	1406.58	1448.56	1083.66	1131.29
66511	2697.23	2568.84	2674.25	2846.14
22088	1641.75	1349.68	1749.47	1843.51
26554	4057.45	3336.13	3675.26	3607.99
50793	2294.25	1894.5	1738.45	1757.13
110109	2435.57	3111.68	2081.91	1663.39
67683	1509.26	1525.68	985.396	1112.91
66054	1914.45	1808.47	1656.71	1917.95
76803	2553.71	1969.64	1464.78	1640.41
70767	2615.53	2345.38	1982.73	2190.89
234549	2978.77	2435.36	2282.11	2258.9
237107	4796.07	4288.32	2607.21	2501.51
232314	3613.61	3026.64	3407.1	3266.12
57438	3456.83	2764.62	3121.49	2954.58
19193	1531.34	1340.78	701.624	794.015
69456	1320.46	1184.55	842.132	862.021
20832	527.744	508.231	544.585	589.997
19684	4003.35	3859.19	2849.66	2680.72
115489417	11168.7	8843.62	11424.3	10981.1
72068	2473.11	2114.99	2183.85	2294.74
56724	899.814	744.549	927.539	1095.45
116848	8428.45	7833.09	6665.43	5178.56
54169	7134.48	6339.05	5555.13	4588.56
54196	1539.07	1902.41	921.111	852.831
56205	1892.37	1728.38	1809.16	1857.3
67201	2294.25	1941.96	1013.86	1122.1
22275	1167	1023.38	797.133	731.523
69684	1067.63	1315.07	616.217	594.592
66258	1054.38	1238.94	878.867	854.669
52715	2101.04	1643.35	1346.31	1411.58
18570	1077.57	935.383	1041.42	1074.31
108660	1683.7	2192.12	1154.37	1120.26
60409	856.756	716.863	555.605	599.187
232679	1551.21	1493.05	1183.76	1308.65
21857	593.988	584.367	269.078	291.323
66830	4085.05	5905.96	2099.36	1662.47
100034361	1619.67	1321.99	1136.92	1108.31
69227	3343.11	2951.5	3290.47	3252.34
269470	3201.79	2799.23	2109.46	2178.95
15925	4804.9	3975.87	2583.34	2599.85
17450	2808.75	2311.76	1585.08	1836.16
18392	2770.1	2620.26	1663.14	1699.23
627375	844.611	788.055	943.151	1106.47
268490	1620.77	1378.35	1274.68	1551.27
13688	1511.47	1624.56	1426.21	1186.43
218210	5343.68	4280.41	3673.42	3415
19058	2579.1	2236.61	2185.69	2184.46
27225	2632.1	2342.41	2638.44	2705.53
70021	1298.38	1483.16	754.889	639.623
66508	894.294	881.989	937.641	958.515
232536	772.847	672.368	555.605	659.841
67602	2127.54	1851.98	1846.81	1760.8
23924	1513.68	1287.39	1501.51	1826.05
53381	686.729	615.019	872.438	1014.57
107829	1964.13	1872.74	1085.5	1060.52
68059	2802.12	2457.11	3055.37	2913.23
20419	1892.37	1657.19	1098.35	1150.59
54353	1351.38	1215.21	791.623	844.56
68966	904.231	1120.28	801.725	867.535
68501	861.172	878.033	843.051	876.725
218914	6123.15	5187.12	4663.41	4499.42
15473	693.354	570.524	648.359	658.003
108155	5065.46	4272.5	5895.84	5660.11
56215	2989.81	3566.52	2638.44	2353.56
52690	2329.58	1924.16	2278.44	2227.65
110157	2452.13	2223.76	1923.04	1916.11
18203	857.86	716.863	731.93	880.401
75616	1568.88	1250.8	1261.82	1114.75
234413	2427.84	1956.79	1817.43	1728.64
56752	2558.12	2380.97	1832.12	1705.66
67486	2771.21	2246.5	2105.79	2087.96
75734	1429.77	1317.05	1687.02	1769.07
18542	1237.66	1898.45	413.26	422.739
20646	1724.55	1874.72	1333.45	1432.72
224092	2004.99	1973.6	1923.04	1676.25
20924	3228.29	3521.03	4076.58	3772.49
226982	5911.17	5343.35	4783.72	5136.28
20932	1922.18	1822.32	2228.85	2167
75620	910.855	818.707	577.646	549.561
14381	2038.11	1664.11	1172.74	1378.5
108682	4041.99	3460.72	1003.76	976.895
73192	5672.69	5449.15	3113.23	2884.74
68250	947.289	1092.6	1103.86	1134.96
226432	5005.84	4001.58	2941.49	3003.29
104263	3398.32	3009.84	3813.01	3636.48
76687	3157.63	2805.16	3172.92	3104.38
66212	243.999	352.993	205.712	232.507
66126	628.214	666.435	477.545	472.365
14548	738.621	679.289	764.99	883.158
13198	648.087	741.582	809.072	953.92
27756	560.866	601.176	517.034	658.922
56418	2160.66	1960.74	2051.61	2084.29
69104	2584.62	2201.02	3005.78	3074.05
56422	2551.5	2145.64	2508.03	2664.18
11431	2782.25	2268.25	2282.11	2430.75
77591	3043.91	2565.87	2475.89	2540.11
19243	3797.99	3302.51	5054.63	5317.33
69878	500.142	625.895	502.341	599.187
56382	932.936	917.585	731.011	767.364
233876	2141.89	2314.73	933.05	1020.09
28146	2125.33	1877.69	2089.26	2131.16
75398	454.875	541.849	458.26	496.259
19230	2640.93	2198.05	2272.93	2318.63
29876	3721.81	3093.88	3111.39	2805.7
232164	2985.4	2652.89	4476.07	4406.6
84704	1692.53	1838.14	1289.37	1391.36
224171	3619.13	3063.23	2403.34	2380.21
15183	1675.97	1291.34	1546.51	1640.41
66420	690.042	2546.1	520.708	264.672
56529	801.552	753.448	877.948	1039.39
59026	14181.7	11995.8	11875.3	11369.9
76789	1919.97	1586	1639.27	1397.8
67052	1864.77	1542.49	1476.72	1520.02
52683	2972.15	3372.72	2740.37	2365.5
14615	1624.08	1492.06	1156.21	1134.04
66840	2001.67	1705.64	1848.65	2007.09
57905	1289.55	1275.52	619.89	687.411
68215	1524.72	1285.41	1012.03	976.895
57750	2660.8	2301.87	1576.82	1762.64
209354	1668.24	1486.13	1198.45	1246.16
20224	2287.63	2101.15	2909.35	2969.28
67958	7244.89	5903	4283.21	4331.24
56367	1588.75	1249.81	1511.61	1503.48
20744	3088.07	2466.01	2317.01	2143.1
18938	596.196	1106.44	360.914	314.298
22384	2107.66	3133.43	2913.94	2714.72
68744	3677.65	3148.26	2699.05	2281.87
72657	364.342	638.75	336.118	345.543
67203	1890.16	1796.61	1200.29	1107.39
56292	665.752	956.147	329.69	343.705
75430	832.466	775.201	689.685	818.828
94232	2978.77	3135.41	2215.07	2414.21
16993	1692.53	1455.48	1822.02	2100.83
68801	2395.82	2119.94	2157.22	2031.91
217995	6276.62	5799.17	3446.59	3420.51
52033	1206.74	1007.56	806.316	889.591
320951	1808.46	1855.93	1638.35	1537.48
26429	1710.2	1467.34	1582.33	1773.67
320267	2963.32	3012.8	3680.77	3406.73
230075	338.948	528.007	482.137	548.642
59052	1226.62	1038.22	990.906	1032.04
102339	2368.22	1916.25	1550.18	1650.52
68999	979.307	821.673	880.703	962.191
66366	1049.97	1049.09	1130.5	952.082
69692	524.432	460.77	648.359	774.716
56520	546.513	484.5	484.892	481.555
67493	2625.47	2602.46	1016.62	1025.6
13726	1248.7	1324.96	1200.29	1336.22
17279	2345.04	1986.45	1985.49	2168.84
53421	2635.41	3514.11	2334.46	1969.41
76425	2893.76	2573.79	2927.72	3065.78
272551	702.186	986.799	475.708	337.272
109129	1068.74	1041.18	1138.76	1273.73
14155	5957.54	5086.27	4659.74	4437.84
28030	2201.51	1736.29	1878.96	1712.09
72047	3523.08	3093.88	3650.46	3697.13
67472	2534.94	2092.25	1732.02	1543
17698	3390.59	2969.3	2977.31	2757
226562	9479.52	8700.24	6992.36	6520.29
14923	593.988	948.237	460.096	494.421
232989	2920.26	3373.71	2384.05	2190.89
67830	1270.78	1245.86	1441.82	1595.38
67285	1536.86	1296.29	1053.35	1198.37
56208	1457.37	1202.35	1635.59	1699.23
69612	2554.81	2295.94	2121.4	2031.91
12069	566.386	571.513	591.421	516.477
12224	1355.79	1189.5	683.257	493.502
192185	2468.69	2235.62	2489.66	2597.09
12793	1121.73	975.922	1210.39	1335.3
94062	1297.28	1067.88	1298.56	1380.34
212880	5165.93	4490.03	3478.73	3181.57
75553	3053.85	2453.15	3490.67	3552.85
22210	1408.79	1252.78	1492.33	1601.81
114896	2219.17	2193.11	1252.64	1151.51
21428	1446.33	1211.25	707.134	839.046
66629	2335.1	2034.9	2614.56	2476.7
72649	3040.6	2444.26	2064.46	2072.34
11750	2178.32	2083.35	1587.84	1612.84
11834	4358.86	4065.85	4121.58	3790.87
22003	1313.84	1293.32	1216.82	1153.34
19395	395.256	560.636	89.9989	87.3049
271457	1949.78	1715.53	2467.62	2355.39
56036	2734.77	2662.78	2834.05	2768.94
20174	1293.97	4378.3	842.132	675.464
66432	1152.65	1008.55	1160.8	1232.38
104130	508.975	660.503	592.34	708.548
19084	2850.7	2863.5	2903.84	3073.13
12649	2967.73	2385.92	1503.35	1512.67
23942	2595.66	2458.1	2235.28	2056.72
18074	4330.15	4999.25	5821.46	5234.62
102122	1301.69	1327.93	1531.82	1896.81
11520	1295.8	1294.87	662.44	551.737
68991	1085.3	1166.76	1494.16	1780.1
20168	2292.04	2037.87	2331.71	2439.94
14784	2168.39	2215.85	2741.29	2511.62
114584	802.656	697.087	818.255	903.376
17966	4036.47	3511.15	3111.39	3133.79
67771	1499.32	1243.88	1455.59	1568.73
76295	4341.19	3508.18	3550.36	3125.51
66921	2849.6	2423.49	2456.6	2552.98
14884	2231.32	1952.83	1885.38	1762.64
211151	345.573	333.218	488.565	555.994
56194	5542.41	4514.75	3954.44	3793.63
67704	626.006	776.19	538.157	573.455
224143	2455.44	2040.83	1129.58	1199.29
67500	3896.25	3361.84	2994.76	2879.22
22099	2759.06	2484.8	2482.32	2588.82
67979	2342.83	1917.24	1782.53	1696.47
74200	2522.79	2115.98	2278.44	2234.09
56742	1338.13	2141.69	1389.47	1317.84
17246	2637.62	2173.33	5494.52	5468.04
20740	7121.23	7098.43	8077.86	7427.35
12534	3777.01	3612	3789.14	3921.37
70495	1924.39	1617.64	1865.18	1751.61
18045	2095.52	1899.44	1772.43	1811.35
70612	1194.6	1024.37	975.294	1061.44
56790	2360.49	2101.15	1721.92	1524.62
56515	2436.68	2078.41	1663.14	1609.17
240641	4845.75	3973.89	2937.82	2736.78
69957	1882.43	1639.39	1997.42	2073.26
55980	1961.93	1718.49	1672.33	1750.69
67956	2173.91	2445.24	1217.74	1140.48
14958	1846	1857.91	1287.53	1460.29
20815	2093.31	1984.47	1468.45	1478.67
74351	2346.14	2628.17	1717.33	1485.1
78920	2278.79	2111.04	1988.24	2058.56
16319	2587.93	2813.07	2276.6	2537.35
77053	3255.89	2957.43	3524.65	3324.02
14567	2172.8	1837.15	1952.42	2049.37
16430	5091.96	4454.44	4474.23	4617.97
69192	2845.18	2807.14	3307.92	3624.53
67044	280.433	788.055	281.017	280.295
74377	1327.09	1390.22	891.724	897.862
73945	6286.56	5486.72	5124.43	4641.86
78372	482.477	545.805	382.954	460.418
68549	3950.35	3336.13	2283.03	2321.39
69792	690.042	584.367	610.707	656.165
26886	870.005	713.897	967.029	1022.85
72017	1395.54	1630.49	1345.39	1448.34
17827	722.06	689.177	438.056	452.147
68544	539.889	550.748	654.788	839.965
98710	1537.96	1350.67	729.175	739.794
51869	11558.5	9294.5	7375.32	6689.39
18005	2675.15	2464.03	1261.82	1226.86
108160	984.827	887.921	883.458	1210.32
103742	399.672	435.062	335.2	373.113
15251	3667.71	3287.68	2344.56	2189.97
67267	154.569	597.221	141.427	138.769
20479	2710.48	2287.04	2249.05	2263.49
22137	2356.08	2034.9	2208.65	2312.2
14084	3765.97	3328.22	2674.25	2975.72
67381	908.647	772.234	1144.27	1253.51
66660	2975.46	2423.49	2204.97	2279.12
16709	3714.08	3000.94	2433.64	2354.47
231413	1933.22	1618.63	2497.93	2576.87
69072	2411.28	2400.75	2368.44	2768.94
78656	3461.25	2951.5	2332.62	2184.46
67163	2697.23	2303.85	2399.66	2235
53328	1416.52	1313.1	1819.26	1899.57
83797	2580.2	2811.09	1407.84	1252.6
68365	2516.17	2114.99	2722.01	2574.11
74838	5242.11	4284.37	3405.26	3386.51
20430	3657.77	3272.85	2388.64	2183.54
50911	1184.66	981.855	974.376	1133.13
67153	1074.26	956.147	800.806	953.001
213464	3277.97	2807.14	2845.07	2786.4
70823	2819.79	2422.5	1603.45	1486.02
71827	1381.19	1382.31	388.465	374.032
13822	3526.39	3280.76	2833.13	2632.01
108737	3799.09	3175.95	2811.09	3024.42
20603	2883.82	2328.57	1638.35	1701.07
218035	2607.81	2292.97	2467.62	2476.7
57376	2348.35	2299.89	1465.7	1359.2
15247	2225.8	1881.64	2017.63	1846.27
83945	2025.96	1820.34	1503.35	1470.4
68441	1170.31	1174.67	1225.09	1213.08
667666	3499.89	2969.3	2540.17	2372.85
66603	1148.23	1030.31	721.828	809.638
66914	579.635	692.144	477.545	479.717
217109	2063.5	1756.07	1267.33	1314.17
18120	1268.57	1143.03	1164.48	1238.81
73158	5565.6	5645.91	3880.97	3565.71
67154	4040.88	3569.48	2234.36	2097.15
72674	2518.38	2395.81	2178.34	2265.33
69597	2552.6	2152.57	2424.46	2268.09
24086	2723.73	2303.85	3700.06	3932.39
110172	932.936	888.91	919.274	1130.37
21843	2362.7	1979.53	2074.57	2229.49
53375	845.715	724.773	867.846	1068.8
110074	1742.22	1691.8	1496	1696.47
14562	1282.93	1315.07	381.118	346.462
15277	4545.44	4410.93	2515.38	2410.53
17758	4680.14	4248.77	5672.68	5890.78
110749	1427.56	1513.82	963.355	994.356
105348	2889.34	2687.49	1798.14	1977.68
14869	394.152	452.86	208.467	221.479
207214	5531.37	4682.85	3900.26	3609.83
59005	267.184	269.936	280.099	412.63
15894	2012.71	2246.5	2715.58	2632.93
330959	401.88	360.903	340.71	321.649
104457	443.835	572.502	288.364	231.588
12282	3656.67	3322.29	4094.95	3926.88
19186	591.78	881	493.157	568.86
26914	1561.15	1469.32	2100.28	2060.39
231086	1537.96	1322.98	1590.59	1693.71
66580	2731.46	2131.8	1986.4	1872.92
16418	1049.97	1320.02	802.643	923.594
69270	685.625	665.447	402.24	473.284
14489	3298.95	2810.1	4142.7	4042.67
22223	739.725	1017.45	844.887	874.887
107047	694.458	729.717	712.644	767.364
12367	2027.07	1738.27	1327.94	1280.16
223593	3297.85	2891.18	2112.22	2048.45
229504	2314.12	1855.93	1643.86	1502.56
67851	560.866	499.332	479.382	673.626
20687	3323.24	2640.03	2129.67	1992.39
77619	364.342	331.24	505.096	659.841
19060	1373.46	1715.53	1024.89	862.94
76205	952.81	891.876	1165.39	1222.27
94064	405.192	304.543	406.832	435.605
66676	2757.96	2295.94	2659.56	2486.81
18983	2073.44	1601.82	1883.55	1811.35
56524	1709.1	1495.03	1431.72	1539.32
98956	3137.76	2965.34	1878.04	1820.54
228889	2000.57	2563.9	1659.47	1745.18
74202	2392.51	2653.88	1122.23	1009.06
12349	1225.51	1143.03	915.601	807.8
54141	3004.17	2505.56	2419.87	2503.35
103551	1549.27	1781.02	686.729	1099.52
72542	1545.69	1263.66	1769.67	1723.12
15107	1292.86	1603.8	1756.81	1607.33
12856	123.655	244.228	134.998	168.177
106021	2945.65	2476.89	2111.3	1983.2
333182	205.356	193.8	426.117	472.365
77134	2065.71	1752.11	1991	2054.88
26943	1886.85	1738.27	3883.73	3989.37
232187	1902.31	1944.92	1428.96	1507.16
56700	1067.63	963.068	1119.48	1256.27
102334	3328.76	3204.62	1929.47	1651.44
13209	4820.36	4456.42	2632.01	2347.12
78893	2161.76	1969.64	1774.26	1622.95
268470	3185.23	3008.85	3264.76	3672.32
26949	2104.35	3077.07	1776.1	2204.68
67444	967.162	867.157	679.583	768.283
11853	646.983	783.111	483.974	416.306
66467	751.869	645.671	909.172	1100.04
68572	460.396	422.208	275.507	385.06
72416	3550.68	3116.62	3597.2	3488.52
80913	5074.29	4248.77	3783.63	3685.18
54342	1863.66	1544.47	1575.9	1589.87
69232	2508.44	2278.14	2546.6	2509.79
58198	4206.49	4579.02	902.744	728.766
66077	775.055	800.909	585.911	596.43
68879	2364.91	2341.42	2386.81	2598.93
74254	1934.32	1775.84	1072.64	1231.46
64138	969.371	899.787	978.049	1107.39
215387	2044.73	1929.1	1782.53	1872
70472	4605.06	3695.06	3250.98	3020.75
319370	1003.6	1770.9	584.993	564.265
104444	654.712	537.894	489.484	510.044
229709	3032.87	2596.53	2727.52	2711.05
21366	4787.23	4410.93	2759.66	2384.8
20742	6905.94	5837.74	4410.86	3834.98
56424	788.304	935.383	840.296	888.672
66151	712.123	815.741	501.422	483.393
14824	1569.98	1553.37	2788.13	2822.24
545085	1413.21	1424.83	1477.63	1543
69804	476.957	478.568	551.932	692.006
22343	3264.73	2709.25	3114.14	3016.15
666532	3249.27	2821.97	1559.37	1686.36
232341	8468.19	7230.92	10737.4	10535.4
20501	3504.31	3376.67	2744.97	2484.97
19777	2345.04	2239.58	2568.64	2725.75
233802	2190.47	1950.86	1677.84	1768.15
12544	1552.32	1374.4	1333.45	1429.96
78246	1359.11	1391.21	1250.8	1320.6
59021	1529.13	1503.93	1562.12	1631.22
75221	1980.7	2499.63	1144.27	1226.86
231915	2846.28	2427.45	1940.49	2132.08
228994	2416.8	2199.04	2526.4	2599.85
228026	4120.38	3690.11	3830.46	3690.7
66834	317.971	377.713	314.078	396.088
71770	4252.86	4144.95	3110.47	3243.15
26921	4711.05	4453.45	2902	2811.22
56298	2775.62	2419.54	2094.77	2091.64
52538	1003.6	1092.6	1054.27	979.652
13383	3553.99	3059.27	2734.86	2620.98
224619	2013.82	2265.29	1968.04	1962.98
13723	1946.47	1643.35	755.807	925.432
108671	1111.8	1045.14	1221.41	1419.85
234865	4612.79	3897.76	2486.91	2524.49
98366	1541.28	1278.49	1820.18	1798.48
54161	3058.26	2933.7	2435.48	2428.91
15369	798.24	671.379	836.622	1077.07
73703	1366.83	1125.23	1591.51	1708.42
67148	932.936	853.314	1095.6	1144.15
66065	878.837	1126.22	348.057	353.814
66213	908.647	784.1	841.214	940.136
67144	1999.46	1938	1728.35	1681.77
12306	899.814	759.38	3382.3	4315.62
19042	2160.66	1850	1889.98	1707.5
229363	3710.77	3171.99	2657.72	2879.22
68581	2687.3	2354.28	2633.84	3120
106143	3419.29	2900.08	3392.41	3453.6
53312	2475.32	2214.86	2537.42	2354.47
56463	2648.66	2963.36	2778.94	2339.77
234407	2391.41	2377.02	2026.81	1821.46
217031	1459.58	1278.49	1044.17	1078.9
69556	909.751	854.303	950.498	1091.77
80795	589.572	470.658	654.788	680.059
56433	2039.21	1720.47	1464.78	1595.38
118451	1467.3	1335.84	1570.39	1690.96
212999	3799.09	3773.17	3639.44	3440.73
72692	2278.79	1842.09	1576.82	1475.91
68995	596.196	466.702	410.505	501.773
171567	1193.5	1122.26	654.788	740.713
68970	2334	1970.63	2395.99	2472.11
18176	3450.21	2925.79	2362.93	2389.4
68936	161.194	147.328	219.487	220.56
57439	2370.43	1976.56	1973.55	2195.49
269061	2720.42	2277.15	2097.52	2188.14
68036	3395.01	3039.5	3526.49	3823.95
76843	3231.6	2643	2161.81	2291.06
67826	1331.5	1235.97	935.805	818.828
28077	512.287	532.951	831.112	700.277
381306	2166.18	1835.17	1739.37	1895.89
19720	1745.53	1523.7	1623.65	2038.34
74360	1807.36	1560.29	1212.23	1139.56
69527	917.479	1471.3	650.196	629.514
74776	872.213	845.404	772.337	868.454
67797	1359.11	1172.69	1246.21	1264.54
65106	844.611	789.044	836.622	880.401
19346	2382.58	2079.4	3025.06	2961.01
216825	3387.28	3061.25	3368.53	3591.45
226517	4523.36	3884.9	4463.21	4471.85
15199	616.069	514.164	845.806	920.837
[truncated: 10,470 more rows]
