# Supplementary material for: ZFP560 facilitates KAP1-dependent chromatin repression to regulate exit from totipotency
Source: Research Square preprint supplement (doi:10.21203/rs.3.rs-7290036/v1), 2025-08-25
Supplement: Supplementary file 3 [file 4d0fcf7288119a17fff6e023.xlsx]

## Sheet: human 
gene	pronuclear	zygote	2 cell	4 cell	8 cell	morula
ZBBX	0.0866667	0.345	0.98	0.48	0.25	0.4
ZBED3	2.69	1.235	1.74667	1.9975	0.29	0.16
ZBED4	5.76333	8.26	4.48667	1.92	4.56727	1.69
ZBED5	1.83333	0.78	5.72	3.34	11.5318	7.85667
ZBED6	0.413333	0.245	4.78	1.04	0.738182	0.163333
ZBTB1	1.40667	3.255	6.85333	1.2575	4.49818	7.33
ZBTB10	19.1967	13.755	39.2333	14.65	28.92	23.96
ZBTB11	7.19667	8.41	22.22	19.7	25.8327	16.5833
ZBTB12	0	0	0	0.025	0.460909	0
ZBTB16	71.58	18.19	28.3267	17.1975	6.54182	0.03
ZBTB17	24.3033	16.23	11.9567	31.6225	15.7818	6.91333
ZBTB2	65.6867	40.47	54.2	49.68	18.8209	24.1667
ZBTB22	6.94333	3.1	1.7	0.7125	1.33909	0.313333
ZBTB24	2.46333	7.94	8.94	20.8125	23.6991	6.46
ZBTB25	0	0	0	0.025	0.663636	1.22
ZBTB26	0.47	0.415	0.0866667	0.41	0.280909	1.89
ZBTB3	0.126667	0.345	0.403333	0.355	4.08364	1.55
ZBTB32	0	0	0	0.025	0.0581818	0
ZBTB33	30.4533	47.98	73.99	53.4875	4.76545	4.77333
ZBTB34	0.476667	1.69	0.83	1.29	1.54727	2.14333
ZBTB37	4.99667	6.56	7.76333	17.425	14.3364	0.14
ZBTB38	5.41	4.03	6.27	6.8925	0.894545	0.116667
ZBTB39	23.88	21.715	25.7533	22.9	3.55364	0.836667
ZBTB4	0.8	0.585	0.76	1.2275	0.855455	0.16
ZBTB40	1.86	1.915	3.48667	4.745	8.27636	1.90333
ZBTB41	0.433333	1.32	3.31667	1.525	0.104545	0.693333
ZBTB43	33.9767	15.22	26.41	23.2675	6.13091	2.11667
ZBTB44	6.06667	4.03	5.82	12.035	4.30727	4.78333
ZBTB45	2.32	1.35	0.296667	0.44	0.562727	0.223333
ZBTB46	0.566667	0.045	0.153333	0.025	0.0172727	0.0533333
ZBTB48	0.796667	0.505	0.873333	1.06	5.04364	5.42333
ZBTB49	63.4533	39.39	18.75	20.6125	3.45182	0.263333
ZBTB5	21.6933	28.455	21.2467	30.1575	14.6455	1.99667
ZBTB6	0.836667	6.44	7.40333	1.54	1.96	3.22333
ZBTB7A	0	0.005	0.28	0.025	0.0527273	0.0833333
ZBTB7B	0.35	0.385	2.79333	1.805	0.897273	0.116667
ZBTB7C	2.02	0.865	3.33333	2.0725	0.303636	0
ZBTB8A	0.85	0.355	1.29667	0.415	5.04818	5.90333
ZBTB8B	2.94	5.45	6.85667	3.78	1.36364	0.433333
ZBTB8OS	0.953333	0	0.67	2.585	7.13818	97.4367
ZBTB9	2.85667	2.51	0.826667	6.76	19.2491	9.43333
ZC3H10	0.5	0.415	0.273333	0.315	10.8727	0.68
ZC3H11A	3.47333	9.435	9.27333	4.2425	23.4555	21.13
ZC3H12A	22.44	7.38	4.67333	3.665	0.367273	2.03
ZC3H12B	0	0	0	0.025	0.112727	0.406667
ZC3H12C	0.0466667	0.025	0.0533333	0.025	0.0381818	0.86
ZC3H13	31.38	5.93	11.6667	8.5975	10.5627	1.25
ZC3H14	19.3767	34.305	46.82	41.17	8.45909	6.94333
ZC3H15	296.757	179.45	312.143	125.888	151.276	252.213
ZC3H18	132.52	41.445	38.3367	50.45	15.7255	1.49667
ZC3H3	25.66	32.44	15.3967	28.9425	5.49	3.09667
ZC3H4	0.0566667	0.22	0.77	2.3975	15.3827	2.09333
ZC3H6	0.0733333	0.145	0.353333	0.7225	0.0672727	0
ZC3H7A	34.69	41.755	43.5633	29.0425	1.23818	4.63333
ZC3H7B	0.00333333	0.005	0	0.025	0.390909	0.09
ZC3H8	101.447	78.065	82.21	35.5825	2.48	10.37
ZC3HAV1	0.01	0.005	0	0.025	0.726364	0.32
ZC3HC1	57.0967	56.415	31.4633	21.665	29.1509	17.6033
ZC4H2	0.0933333	0.81	0.0566667	0.6775	0.00545455	0.0433333
ZCCHC10	5.78667	5.915	7.44	4.165	79.8236	42.58
ZCCHC11	0.0333333	0.115	0.0633333	2.6625	1.52909	1.91333
ZCCHC12	2.36333	1.915	0.213333	4.045	0.954545	0.146667
ZCCHC13	0	0.13	0.13	0.025	0.00545455	0
ZCCHC14	30.6	27.96	24.1033	33.7025	9.54545	1.83
ZCCHC17	62.92	39.72	129.607	53.82	96.6127	37.8967
ZCCHC2	14.19	14.83	25.5633	19.835	4.68727	0.313333
ZCCHC3	41.1033	41.025	29.1767	11.5875	18.69	10.6967
ZCCHC4	1.26	5.46	2.93333	1.72	0.560909	5.84333
ZCCHC6	0.786667	2.94	5.48333	4.415	6.70364	3.00667
ZCCHC7	69.12	31.38	47.4433	64.875	24.08	21.6433
ZCCHC8	6.07	6.905	14.4333	4.91	28.8791	12.35
ZCCHC9	9.87667	8.79	4.33333	8.2825	35.0691	27.1
ZCRB1	207.523	105.8	197.023	106.233	70.8709	72.7967
ZCWPW1	13.2367	7.365	9.45667	12.92	3.35636	0.0133333
ZCWPW2	0.846667	0.15	0.97	0.025	0.822727	0.566667
ZDBF2	0.29	3.175	3.15	4.8425	1.78727	0.206667
ZDHHC1	0.03	0.025	0	0.1675	0.112727	0
ZDHHC11	0	0	0	0.025	0.0272727	1.65
ZDHHC12	1.70667	2.62	0.626667	2.6225	16.5627	19.5133
ZDHHC13	1.94	3.265	0.466667	1.4025	0.929091	1.37333
ZDHHC14	0.07	0.01	0.343333	1.215	0.813636	0.226667
ZDHHC15	0.0533333	0.14	0.176667	0.025	0.00545455	0
ZDHHC16	53.7267	27.805	7.57	6.6675	10.8382	29.7667
ZDHHC17	0.276667	0.295	0.956667	1.205	4.51364	2.46
ZDHHC18	26.4433	24.365	9.54	7.325	5.71091	6.78333
ZDHHC2	0.82	0.77	0.766667	0.2325	0.887273	0.846667
ZDHHC20	0.173333	0.03	0.423333	0.025	4.59091	1.74667
ZDHHC21	0.623333	0.515	0.3	1.18	0.85	0.456667
ZDHHC23	0.0466667	0.155	0.14	0.025	0.163636	1.93667
ZDHHC24	1.67333	1.635	0.03	0.33	2.68636	1.50667
ZDHHC3	6.61	5.035	2.91333	2.395	6.73364	4.89667
ZDHHC4	33.43	31.245	34.98	18.015	6.94091	19.04
ZDHHC5	31.17	30.535	23.9133	10.675	20.5191	8.26333
ZDHHC6	8.94	7.355	9.14	2.455	7.88455	21.0533
ZDHHC7	116.847	147.87	64.0367	43.0575	24.1773	15.3667
ZDHHC8	3.78	2.415	1.86333	3.9025	0.880909	0
ZDHHC9	0.993333	0.82	0.666667	2.9475	1.59273	3.62
ZEB1	1.21667	0.62	2.56667	2.9875	0.309091	0.52
ZFAND1	3.65	5.33	6.71667	0.68	2.42909	14.31
ZFAND2A	938.823	966.5	714.31	952.69	477.642	117.8
ZFAND2B	0.476667	1.415	0.31	0.795	10.56	10.0367
ZFAND3	10.1133	7.04	8.14667	14.2025	11.7727	2.67667
ZFAND5	128.713	172.565	180.057	108.953	316.994	273.56
ZFAND6	189.68	56.045	150.87	36.5	69.8982	67.1633
ZFAT	1.86	1.65	0.526667	7.2225	1.00273	0.04
ZFC3H1	4.37667	8.705	5.51333	16.4825	4.72182	2.49333
ZFHX3	6.83333	5.11	4.17333	5.7275	1.40545	0.15
ZFHX4	0	0	0	0.025	0.684545	0.02
ZFP1	2.94333	10.07	12.9767	12.035	4.63364	2.79333
ZFP106	13.99	7.24	5.86667	16.185	6.83182	14.95
ZFP112	0.00333333	0	0	0.36	0.765455	0.576667
ZFP14	1.72333	1.365	1.45	1.2375	0.633636	0.423333
ZFP161	2.26333	5.15	4.8	1.37	1.80818	3.17
ZFP2	0.19	1.82	0.61	0.025	0.08	0
ZFP28	1.05333	3.76	5.41	8.51	6.58636	2.98
ZFP3	1.9	4.46	3.19333	2.28	8.15455	1.91333
ZFP30	0.05	0.07	0.283333	0.195	0.0854545	0.483333
ZFP36	21.6133	19.995	7.50333	8.9125	0.940909	0.333333
ZFP36L1	0	0	0.0666667	0.025	2.12273	8.33667
ZFP36L2	0.303333	0.815	0.0366667	1.2025	4.65455	22.1767
ZFP37	0.0866667	0.18	0.386667	0.1175	12.0527	0.73
ZFP41	0.5	0.49	1.52667	0.105	1.25545	0.266667
ZFP42	0	0	0.103333	0.1975	30.6927	48.8533
ZFP57	0.106667	0.11	0	0.025	0.00545455	44.1467
ZFP62	6.01	11.265	16.03	20.945	10.2345	6.82667
ZFP64	1.93667	0.67	1.70667	2.555	0.588182	2.76333
ZFP82	5.85333	10.04	16.63	10.605	17.9855	7.5
ZFP90	2.62667	2.31	9.60333	2.8025	12.0682	2.13
ZFP91	4.97667	3.81	3.99333	5.17	29.5527	6.73667
ZFPL1	10.3533	7.99	0.563333	3.79	4.38818	9.07333
ZFPM1	0.0166667	0.045	0.0166667	0.025	1.21	0.0233333
ZFPM2	23.7367	36.545	37.4	29.9925	9.26182	0.02
ZFR	15.94	15.87	42.37	55.1475	14.2382	19.8667
ZFR2	0.546667	1.345	0.996667	0.665	6.70182	9.6
ZFX	0.106667	0.465	0.966667	0.44	1.42727	2.99
ZFY	0	0	0	0.025	0.205455	1.56
ZFYVE1	1.45333	1.26	2.01333	1.315	42.6064	16.3567
ZFYVE16	1.82	3.915	6.58	3.085	2.66636	2.53667
ZFYVE19	0.916667	0.73	1.59333	0.53	66.2	12.7433
ZFYVE20	1.2	1.8	2.08	3.51	0.583636	3.92
ZFYVE21	220.17	279.025	116.833	59.785	17.6245	21.1733
ZFYVE26	0.356667	0.33	1.03333	0.3225	0.446364	1.41333
ZFYVE27	0.0766667	0.05	0.193333	0.025	8.39909	0.753333
ZFYVE28	0.00666667	0.02	0.0133333	1.3125	0.00545455	0.123333
ZFYVE9	1.94667	2.065	3.82333	9.85	1.42273	0.573333
ZHX1	56.1033	32.01	58.3733	70.41	16.7636	1.04
ZHX2	6.28	6.635	3.19333	1.865	0.112727	0.09
ZHX3	18.55	14.295	18.65	25.3175	5.51273	0.113333
ZIC1	0	0	0	0.025	0.0872727	0.0866667
ZIC2	0.673333	0.21	0.0166667	0.93	0.607273	4.12333
ZIC3	0.16	0.04	0	0.025	0.138182	0
ZIC5	0	0	0	0.1075	0.645455	0.773333
ZIK1	3.52	11.775	18.6933	3.3425	140.1	24.3833
ZIM2	56.8333	29.72	33.21	13.9475	2.50727	0.423333
ZIM3	0	0	0.313333	28.985	340.85	29.1067
ZKSCAN1	0.273333	0.125	0.44	1.865	4.53	0.176667
ZKSCAN2	11.08	10.4	11.1133	7.195	6.11	1.01333
ZKSCAN3	0.25	0.4	0.04	0.025	0.00545455	0.92
ZKSCAN4	6.62667	3.9	5.20333	1.08	9.84455	4.27667
ZKSCAN5	7.66333	5.745	8.33333	3.1025	22.7673	7.10333
ZMAT2	23.7533	34.74	54.1333	23.785	69.7664	55.33
ZMAT3	0.453333	0.305	0.82	0.3025	1.93727	6.64667
ZMAT4	0	0	0	0.025	0.864545	0
ZMAT5	4.34667	4.525	1.19333	2.06	115.299	47.58
ZMIZ1	0.03	0	0.0166667	0.025	0.166364	5.32667
ZMIZ2	3.90333	1.79	0.636667	3.9725	2.58091	0.06
ZMPSTE24	18.94	29.835	32.2533	16.4775	28.5709	37.4833
ZMYM1	0.506667	0.355	1.22333	0.135	7.11273	35.0467
ZMYM2	46.7467	73.68	98.0967	107.268	14.6127	16.3133
ZMYM3	7.46333	5.24	3.79667	4.3575	0.988182	0.8
ZMYM4	1.51333	4.895	10.7967	7.1275	4.89909	7.31
ZMYM5	11.6933	14.19	15.57	18.4525	13.3109	13.75
ZMYM6	1	2.19	6.91667	5.49	3.84182	3.1
ZMYND10	0.0166667	0	0	0.025	0.00545455	0
ZMYND11	5.41	6.13	7.89667	7.695	0.361818	5.61333
ZMYND12	1.49	4.705	4.17333	9.085	7.39636	0
ZMYND17	0.0133333	0.24	0	0.025	1.27727	0.04
ZMYND19	14.0467	9.755	12.1	21.1625	30.59	12.14
ZMYND8	114.187	55.535	70.72	94.9075	52.3573	7.24333
ZNF10	5.54333	24.505	31.6467	32.595	8.77364	2.49667
ZNF100	0.12	1.175	0.51	1.5	16.4873	14.46
ZNF101	0.616667	1.63	0.77	2.94	41.3891	27.1767
ZNF107	1.94667	2.965	7.60667	17.5225	2.82636	2.00333
ZNF114	0.0133333	0.025	0.0866667	0.1075	13.3109	7.53
ZNF117	0	0.02	0.0866667	0.3825	0.155455	0.0966667
ZNF12	0.936667	1.03	2.29	0.6925	1.28273	7.30667
ZNF121	3.55	1.67	10.4233	2.4375	8.23	3.74333
ZNF124	3.3	1.625	3.96667	3.5775	11.1791	4.42
ZNF131	85.5233	38.765	119.287	89.2525	53.3136	15.3567
ZNF132	2.78	2.255	4.53667	2.45	12.2618	4.29
ZNF133	0.746667	1.585	2.92333	2.495	0.652727	3.21
ZNF134	32.23	31.5	52.1567	66.26	56.5118	62.5367
ZNF135	1.86	1.625	6.63	4.0025	0.858182	0.586667
ZNF136	40.0533	25.58	40.0567	39.2525	26.7655	3.8
ZNF138	1.88333	1.74	7.51	1.79	28.1155	35.1167
ZNF14	8.57	17.905	16.8933	13.8375	2.57636	3.69
ZNF140	11.3533	12.705	17.3233	19.1425	20.5118	8.13333
ZNF141	0.293333	0.73	5.34333	11.72	1.67182	0.103333
ZNF142	11.93	11.88	14.6533	10.72	14.7327	5.44333
ZNF143	26.3067	38.9	63.7333	62.1575	41.2445	10.98
ZNF146	3.23667	9.12	22.36	16.605	6.27545	27.6467
ZNF148	16.93	9.655	21.57	12.9725	11.9855	3.80333
ZNF154	0	0	1.04667	0.025	0.0145455	0
ZNF155	342.957	344.01	325.727	191.573	13.7336	5.10667
ZNF157	0.00666667	0	0	0.025	20.0436	0.08
ZNF16	8.83667	19.4	13.4433	18.595	10.8818	6.48
ZNF160	13.7667	14.865	20.06	17.725	5.33727	2.43
ZNF165	0	0.83	0.213333	0.025	1.78182	13.5233
ZNF167	3.16	1.855	3.55667	1.695	0.0154545	0.00666667
ZNF169	0.0766667	0.105	0.0266667	0.315	3.63	1.16
ZNF17	5.33667	11.01	12.2333	12.4825	10.0945	10.62
ZNF174	13.5433	4.96	3.18667	0.17	36.9573	7.50667
ZNF175	0	0	0	0.025	2.98818	1.76667
ZNF177	8.63	10.155	8.22667	4.2275	1.00545	4.78
ZNF18	11.52	18.545	15.96	19.61	8.40364	7.56667
ZNF180	1.14333	4.685	10.9833	0.3675	5.78182	18.68
ZNF181	7.45333	11.555	29.8467	10.8175	0.385455	1.03667
ZNF182	7.44	3.405	7.24333	25.6875	0.751818	0.06
ZNF184	8.98667	16.765	32.28	6.4375	19.91	1.89333
ZNF185	0.246667	0.32	0.2	1.1	0.0527273	0.143333
ZNF187	25.69	29.255	16.49	26.7925	9.41364	6.24333
ZNF189	14.4933	25.83	14.1	34.21	11.74	6.48
ZNF19	6.97	21.145	20.37	3.2725	5.87727	4.98333
ZNF192	1.06	0.555	0.793333	4.13	0.821818	0.0366667
ZNF193	13.62	31.035	34.7367	3.635	11.4527	19.5133
ZNF195	15.3267	15.57	25.1	25.5825	13.5782	31.9
ZNF197	0.483333	0.365	0.83	0.1825	0.2	0.456667
ZNF2	3.50667	4.525	5.54	1.3575	6.95818	3.07
ZNF20	0.00666667	0	0	2.9975	20.0564	6.92333
ZNF200	40.1	74.915	92.0133	45.1275	47.9327	27.97
ZNF202	15.6567	22.01	21.3367	15.32	11.5209	5.22333
ZNF205	0.776667	0.01	0.11	1.2925	0.485455	1.30667
ZNF207	80.3733	121.875	112.623	112.73	243.146	181.057
ZNF208	0	0.12	0.186667	0.0875	2.68636	5.72
ZNF211	46.8367	59.895	38.2167	7.8525	62.5382	12.5267
ZNF212	2.76333	1.56	2.24	1.43	14.3973	3.76667
ZNF213	0.18	0.085	0.0333333	0.7825	1.58455	0.493333
ZNF214	8.75333	18.915	22.0533	7.4875	4.22818	0.22
ZNF215	140.93	167.895	155.893	105.065	15.6045	8.87333
ZNF217	1.43333	2.915	6.47	17.455	13.7591	31.5567
ZNF219	0	0.005	0	0.2075	0.299091	0.0166667
ZNF22	97.59	97.67	125.527	101.36	14.0927	29.5033
ZNF221	0.01	0.02	0.24	0.0825	6.94	0.136667
ZNF222	38.5367	86.355	80.6767	69.875	0.0790909	6.32333
ZNF223	1.61667	1.66	6.79667	1.015	0.05	0.0233333
ZNF224	0.983333	0.485	1.72333	0.1575	14.2309	6.02333
ZNF225	2.01333	3.61	1.51333	2.475	5.14636	2.73
ZNF226	0.34	0.875	0.606667	5.96	13.48	14.93
ZNF227	45.07	93.585	102.33	109.712	5.37	10.24
ZNF229	19.9533	29.905	32.0667	43.88	6.97091	3.15667
ZNF23	1.32	3.86	5.96	4.86	24.7782	14.7867
ZNF230	0	0	0	0.305	6.49818	2.50667
ZNF232	1.89	2.145	2.98333	8.985	5.03273	19.6233
ZNF233	0.03	0.025	1.03	3.3625	0.241818	1.58667
ZNF234	0.493333	0.33	0.216667	0.1525	0.740909	0.363333
ZNF235	1.75	7.925	10.7367	9.15	3.37182	3.17
ZNF236	3.67667	1.88	2.70667	4.275	2.10818	1.41667
ZNF238	1.01	0.685	1.54667	3.29	3.52727	0.843333
ZNF239	1.53333	11.05	2.77	4.94	11.7873	5.99667
ZNF24	6.32	2.45	5.68	5.7125	7.96455	8.61333
ZNF248	0.213333	0.215	0.173333	1.8125	0.0718182	0.64
ZNF25	6.67	7.525	8.00667	6.995	0.548182	0
ZNF250	0.74	0.72	1.19333	2.315	1.17727	0.843333
ZNF251	35.07	24.405	23.3933	31.4275	7.22091	1.20333
ZNF253	0.0966667	0.82	1.28667	1.1475	3.21182	6.17
ZNF254	0.14	0.005	0.136667	0.325	26.7855	12.2433
ZNF256	43.8233	23.08	39.2733	23.51	54.1173	22.3167
ZNF257	2.84	2.66	10.52	24.915	6.73818	11.2067
ZNF259	2.94333	6.42	8.15	11.3325	7.16182	66.5167
ZNF26	0.11	0.095	2.11667	0.1225	10.4327	5.22
ZNF260	0.34	0.675	1.68333	1.01	4.11182	16.4033
ZNF263	0.01	0	0.226667	0.2075	29.5982	20.1167
ZNF264	0.02	0.13	1.06333	0.5675	1.85545	0.536667
ZNF266	8.11333	8.165	8.29	12.3875	45.2418	23.76
ZNF267	25.0167	30.015	60.0533	7.62	21.67	25.7833
ZNF268	3.70667	3.73	8.64667	6.5225	12.5591	19.38
ZNF273	0.236667	0.305	2.54	1.445	10.0273	20.3833
ZNF274	1.1	2.145	2.60667	4.0525	7.18273	12.49
ZNF275	0.0466667	0	0	1.26	1.28273	0.0333333
ZNF276	0.37	0.655	0.116667	0.2925	3.20182	0.92
ZNF277	10.6667	6.405	6.38667	20.7175	2.23	12.64
ZNF28	0.956667	1.68	9.6	2.08	1.76818	7.79667
ZNF280A	0	0.02	0.516667	4.33	535.973	62.4133
ZNF280B	66.4933	57.375	86.6733	39.0225	11.2118	0.42
ZNF280C	46.2	56.885	72.94	59.0475	1.68818	0.473333
ZNF280D	1.74	2.07	6.73	1.5575	0.00545455	0.69
ZNF281	120.883	75.55	82.9267	170.25	38.86	5.34
ZNF282	4.76333	2.195	0.373333	1.6175	0.599091	2.74667
ZNF283	0.03	0.025	0.183333	0.025	0.818182	2.95333
ZNF284	0.07	0.05	0	2.1075	5.17182	0.203333
ZNF285	19.46	49.4	39.4467	25.7725	2.79909	6.19333
ZNF286A	0.04	0.06	0.243333	0.5225	3.32273	0.696667
ZNF286B	0.00333333	0.015	0.0233333	0.025	0.195455	0.05
ZNF287	0.136667	0.135	0.26	0.025	1.08909	0.203333
ZNF292	3.72333	0.765	2.02333	2.41	0.423636	1.26333
ZNF295	3.01667	4.99	7.82	8.1775	4.66909	3.75667
ZNF296	5.40333	4.83	3.48667	3.92	193.184	14.0267
ZNF3	59.09	48.23	47.0733	41.8275	7.11	18.29
ZNF30	1.37333	6.07	7.24667	3.05	4.63909	14.14
ZNF300	0.726667	2	2.15667	6.1675	10.45	3.59667
ZNF302	4.25333	2.375	10.69	1.785	6.68273	11.1267
ZNF304	21.7667	25.37	41.4733	37.405	22.4082	4.19
ZNF311	0	0	0	0.025	1.01273	2.06667
ZNF317	0.0633333	0.045	0	0.7425	1.35455	3.15
ZNF318	4.9	5.23	6.31	9.1775	4.28818	5.99667
ZNF32	0.72	0.1	3.64667	0.025	0.00545455	4.48333
ZNF320	0.4	0.575	0.57	1.02	0.876364	1.56
ZNF321	0.0633333	0.33	2.4	3.7775	2.02636	2.28
ZNF322A	0.08	0.48	0.84	0.025	0.607273	0.496667
ZNF322B	0.00333333	0.16	0.476667	0.235	0.0609091	0.00333333
ZNF323	0.176667	0.53	1.49667	0.8925	0.182727	0.163333
ZNF324	35.0167	6.145	6.77	29.1925	19.9091	1.94
ZNF324B	0.00666667	0.035	0	0.025	1.06818	0
ZNF326	0.0566667	0.03	0.15	1.2225	1.77273	3.41667
ZNF329	0.933333	2.85	1.95333	10.115	1.16182	1.36
ZNF330	73.7267	108.3	165.483	88.3025	40.8982	31.4167
ZNF331	0.11	0.305	0.03	5.275	4.34909	10.5033
ZNF333	0.0466667	0.45	0	0.025	0.218182	0.803333
ZNF334	0	0.185	0	0.025	0.00545455	2.91667
ZNF335	2.01333	1.835	2.40333	2.86	13.4436	12.6133
ZNF337	12.5367	15.525	25.1633	37.7575	5.07273	4.99
ZNF33A	0.866667	1.51	1.65333	0.7825	1.07636	4.95667
ZNF33B	0.05	0.185	1.04333	0.24	0.415455	2.21667
ZNF34	1.53667	0.575	5.44333	0.025	14.8591	5.01333
ZNF341	2.01	0.485	0.546667	1.4625	3.34091	0.34
ZNF343	1.33	1.54	6.15667	5.72	2.59818	2.08333
ZNF345	0.1	0.055	0	0.025	0.98	0.783333
ZNF346	12.9	5.61	11.71	19.275	4.27727	2.08333
ZNF347	0.916667	0.79	0.146667	0.025	4.12091	3.38667
ZNF35	0	0	0.0766667	0.025	1.67636	0
ZNF350	4.40333	10.445	6.09333	1.6025	36.6018	26.8667
ZNF354A	16.8467	38.125	51.9933	108.638	10.4655	21.2467
ZNF354B	0.866667	2.28	3.81	1.7025	0.96	0.606667
ZNF354C	0.273333	2.41	1.19667	5.1175	1.91909	0.0133333
ZNF358	0.0133333	0.01	0	0.025	0.464545	0.18
ZNF362	0.493333	1.145	1.19333	0.48	0.214545	0
ZNF365	0.366667	1.05	0.39	0.885	0.0745455	0.15
ZNF367	0.346667	0.07	0.926667	0.1	0.618182	0.963333
ZNF37A	0.0266667	0.135	0.0266667	0.1625	0.356364	0.333333
ZNF382	1.19	1.87	6.38	6.76	0.00545455	1.58
ZNF383	0.89	3.435	3.94333	2.18	1.25727	4.37
ZNF384	2.7	1.35	1.99667	3.7475	2.65273	0.386667
ZNF385A	0.0266667	0	0.596667	0.025	0.0281818	0.2
ZNF385B	1.86667	3.895	4.57333	4.155	1.59	0.37
ZNF385D	0.0633333	0.14	0.316667	0.5975	0.198182	0
ZNF389	0.00333333	0	0	0.025	1.24091	0.6
ZNF391	0.973333	3.59	9.47667	9.8775	0.56	1.73667
ZNF394	6.17	6.525	4.03333	11.0725	245.027	51.0767
ZNF395	54.3133	26.22	27.6133	58.47	4.23909	0.32
ZNF397	41.96	18.955	32.82	36.76	7.72727	1.87667
ZNF397OS	0.0466667	0.33	0.13	0.0525	1.84182	0.253333
ZNF398	1.81667	2.22	2.02333	2.7075	8.32091	13.7267
ZNF404	1.32667	7.215	20.4567	5.7175	0.130909	0.273333
ZNF407	9.17	10.1	9.04667	9.18	1.27818	0.963333
ZNF408	2.93667	2.16	1.77	2.1375	81.9373	7.69667
ZNF41	0	0.005	0	0.0475	0.995455	0.84
ZNF410	8.97333	30.78	32.35	18.9025	116.945	25.0267
ZNF414	0.1	0.21	0.38	0.4025	0.521818	0.193333
ZNF415	3.29333	1.91	13.7867	19.54	7.76727	13.3467
ZNF416	47.9267	60.205	65.4033	84.535	51.1009	15.05
ZNF417	0.0133333	0.04	0.236667	0.1375	4.8	0.38
ZNF418	0.146667	0.335	0.123333	0.3275	1.67727	0.09
ZNF419	65.28	79.88	47.0667	42.165	19.0209	18.0933
ZNF420	14.2767	7.5	24.4433	9.8075	0.335455	1.41
ZNF425	7.22667	4.785	10.43	9.8	1.57636	0.05
ZNF426	84.31	33.53	83.9633	31.075	28.9291	6.90333
ZNF428	0.66	0.43	1.06333	1.845	11.32	1.22333
ZNF429	0	0	0	0.375	0.696364	1.44667
ZNF43	1.40333	0.52	3.53	1.8725	9.55	3.62667
ZNF430	1.23667	1.555	2.8	0.7325	1.84	1.21667
ZNF431	0.0933333	1.21	4.75333	2.695	3.28182	2.65333
ZNF432	0.656667	0.85	1.3	0.3375	7.23364	1.80667
ZNF433	2.37	4.59	2.27	1.2575	6.14909	3.6
ZNF434	1.24	5.165	1.16	0.1925	17.7018	6.14333
ZNF436	10.9933	20.435	18.18	16.45	7.96273	1.20333
ZNF438	11.55	13.315	12.6667	15.335	5.80091	0.116667
ZNF439	0	0	0	0.025	1.58727	0
ZNF44	34.8733	12.065	21.45	16.79	5.23455	8.52667
ZNF440	0	0	0	0.025	0.205455	0
ZNF441	0	0.095	0	0.025	0.249091	0.106667
ZNF442	0.0833333	0.065	0	0.08	0.02	0.47
ZNF443	11.7633	37.065	24.9333	2.155	2.15727	4.66333
ZNF444	0.643333	0.19	0.326667	1.2675	2.68182	3.44333
ZNF445	2.79667	5.365	6.60667	4.935	1.22636	0.356667
ZNF446	0.00333333	0.015	0.326667	0.025	6.48818	0.836667
ZNF449	20.9267	24.975	29.34	11.395	2.15909	3.31333
ZNF45	1.5	2.565	3.24	8.815	6.67545	5.81
ZNF451	2.31667	3.34	4.33333	2.6675	5.86545	4.14333
ZNF454	0.26	0	0	1.12	0.101818	0.636667
ZNF460	0.863333	1.785	2.51333	0.5425	4.03364	0.23
ZNF461	25.7533	44.325	31.5033	38.6525	3.07	3.02333
ZNF462	5.05	2.91	4.83	3.12	1.15091	0.0366667
ZNF467	0.0466667	0.03	0.48	0.025	0.168182	0.0266667
ZNF468	2.88667	3.745	3.16333	16.8325	5.78182	16.9733
ZNF470	0.04	0.525	0.31	0.83	1.15909	1.57667
ZNF473	4.15333	2.635	5.36667	5.455	85.6255	19.99
ZNF479	0	0	0.0866667	0.025	6.04273	0.03
ZNF48	0.00333333	0	0	0.025	8.45182	2.46667
ZNF480	0	0	0.93	5.0575	1.77636	9.39667
ZNF483	3.48	7.255	10.1233	4.405	0.00909091	0
ZNF484	0.0666667	0.885	0	0.355	6.16545	3.69
ZNF485	1.16	3.48	1.13	0.025	3.3	10.7267
ZNF486	0.27	0.97	3.92667	7.3	53.1518	40.1333
ZNF490	2.58	4.215	3.19667	3.21	12.4082	8.66667
ZNF491	0.0133333	0	0.23	0.2175	0.177273	0
ZNF492	0	0.025	0	0.09	0.235455	0.463333
ZNF493	1.52	3.06	4.64	10.28	0.978182	1.93333
ZNF496	0.97	0.435	2.54333	0.61	1.19	1.70333
ZNF497	0.313333	0.575	0.356667	1.0075	4.73455	1.64333
ZNF498	2.58	3.62	6.73	2.6225	4.84182	2.31333
ZNF500	0.69	0.105	1.28333	1.9975	0.274545	0.243333
ZNF501	16.1233	23.445	18.7	7.6525	17.1555	5.87667
ZNF502	96.3067	16.055	38.8167	58.3225	25.8664	7.23
ZNF503	0.00666667	0.045	0	0.2375	0.983636	0.0533333
ZNF506	9.82333	13.34	24.78	2.85	23.0236	4.82667
ZNF507	1.11667	2.56	3.32333	4.16	2.94273	3.83667
ZNF510	3.41667	10.59	11.98	12.91	3.54727	3.85333
ZNF511	3.98	4.325	1.44	3.75	13.5173	21.7433
ZNF512	1.78333	6.745	3.25333	8.995	1.90182	0.92
ZNF512B	0.18	0.45	0.406667	0.4	0.143636	0.07
ZNF513	47.45	43.45	40.6433	15.5275	22.72	3.4
ZNF514	1.29333	0.805	1.77333	1.0375	0.985455	0.06
ZNF516	0.03	0.125	0.39	0.025	0.155455	0.42
ZNF517	0.04	0.065	0	0.31	0.474545	0
ZNF518A	0.836667	2.77	3.81667	3.2725	14.0755	18.0633
ZNF518B	2.94	5.79	5.37	17.81	1.77909	7.46667
ZNF519	0.22	1.485	1.64	0.1175	0.279091	0.963333
ZNF521	0.316667	0	0.433333	0.465	0.105455	0
ZNF524	0.516667	1.31	0.626667	0.5925	4.13727	3.58667
ZNF526	4.71667	5.965	4.07333	7.3425	10.2909	7.90667
ZNF527	0.0866667	0.585	1.00333	0.885	0.376364	0.59
ZNF528	1.50333	3.76	2.8	2.63	7.83909	5.53333
ZNF529	2.42333	4.255	5.95333	2.0225	4.16909	5.22
ZNF530	5.58333	2.995	2.88667	7.3475	21.98	4.47333
ZNF532	7.05333	5.485	9.96333	12.2225	2.93818	2.22
ZNF534	10.2433	1.41	7.31333	5.25	13.4036	8.10333
ZNF540	6.6	10.795	17.4067	1.275	0.573636	0.396667
ZNF541	0.77	0.325	0.18	2.0925	1.59364	0.226667
ZNF543	0.5	1.215	0.443333	0.23	1.54182	0.626667
ZNF544	3.52667	4.88	6.87	4.28	16.6673	6.91333
ZNF546	1.83	0.21	2.21	2.3375	0.363636	0.446667
ZNF547	1.04667	4.95	12.0133	3.475	13.0327	4.42667
ZNF548	9.19667	10.53	15.7333	23.6825	8.39273	2.86667
ZNF549	14.29	18.4	16.9567	18.08	6.95545	2.15
ZNF550	2.25333	0.995	1.17667	9.225	0.829091	1.13
ZNF551	0.77	1.555	2.72667	8.0025	2.88727	1.29667
ZNF552	1.91333	4.045	6.10333	1.905	1.39727	20.8267
ZNF554	4.13667	9.865	12.4333	18.6575	3.17545	2.30333
ZNF555	13.3467	24.875	38.3567	29.395	8.13818	1.30333
ZNF556	5.33	6.18	1.70667	3.65	0.586364	0
ZNF557	0.603333	0.81	1.55667	6.6275	15.0455	2.31667
ZNF558	28.8667	33.925	10.32	4.91	0.885455	1.31333
ZNF559	39.7533	43.66	25.34	7.59	5.95364	11.79
ZNF560	1.73667	1.93	2.99333	7.985	11.4282	1.51667
ZNF561	5.33333	14.77	9.63333	13.5425	9.90091	26.66
ZNF562	2.90667	10.885	9.81	7.4175	4.25909	6.76333
ZNF564	8.44	18.23	16.61	2.6975	5.29909	7.57667
ZNF565	1.08667	5.56	2.79333	20.3925	6.54364	18.22
ZNF566	1.35667	1.61	4.30667	0.735	4.97545	11.8567
ZNF567	1.7	5.25	6.32667	3.8275	4.03091	9.61667
ZNF568	0.38	1.335	0.99	0.025	9.53636	1.84
ZNF569	5.42	5.89	21.6033	3.2025	7.19727	8.01667
ZNF57	22.2333	65.78	47.3567	36.7825	10.86	78.9733
ZNF570	1.62	6.06	4.49	2.2225	6.98091	4.54
ZNF571	25.5333	85.705	108.643	53.725	7.53273	5.77
ZNF573	7.77	1.19	2.82667	1.865	0.0381818	0.0766667
ZNF574	159.427	116.66	88.67	124.415	84.7373	36.2133
ZNF575	0.223333	0.02	0.04	0.22	0.105455	0.0966667
ZNF576	2.06	0.2	1.8	2.2425	36.5382	20.74
ZNF577	0.02	0.15	0.116667	0.085	7.36455	5.81
ZNF578	0.153333	0.16	0.196667	1.165	7.25727	5.84333
ZNF580	3.53667	7.835	5.34333	2.985	3.38636	1.12
ZNF581	54.51	32.175	32.71	39.3575	153.881	152.263
ZNF582	0.39	0.275	0.08	0.3725	4.93636	2.66667
ZNF583	0.173333	0.37	0.263333	0.0725	3.28273	2.82667
ZNF584	45.5067	17.98	21.97	14.4775	53.9918	31.8967
ZNF585A	6.86333	5.875	6.08667	8.2475	2.13545	2.13667
ZNF585B	2.37	2.495	3.10333	1.6775	4.07364	1.36667
ZNF586	38.2933	46.4	59.25	39.9775	48.0818	43.1233
ZNF587	0.45	2.15	2.19333	5.86	1.12091	0.883333
ZNF589	13.8267	10.63	15.8033	23.4175	40.4782	33.4267
ZNF592	0.89	0.825	2.78	1.9625	1.79909	1.64
ZNF593	99.2333	70.535	30.2367	77.275	307.184	201.41
ZNF595	30.27	65.075	86.8767	27.5625	41.2855	41.21
ZNF596	0.136667	0.555	4.65	0.17	22.9173	3.21333
ZNF597	5.21333	12.595	6.00667	7.58	69.2536	10.4233
ZNF598	20.0133	13.485	3.04667	9.9125	7.37182	2.77
ZNF599	0.16	0.05	0.05	0.12	1.08909	0.336667
ZNF600	13.7167	19.455	19.0233	22.5575	10.6427	76.67
ZNF605	0.0166667	0.255	0.0333333	0.14	4.94636	0.96
ZNF606	6.44	12.98	11.3667	4.5125	5.47273	1.94333
ZNF607	8.72667	15.31	10.32	12.15	1.37455	3.48667
ZNF609	2.08667	1.285	3.22	2.7575	0.756364	0.3
ZNF610	29.82	28.245	53.4067	43.72	0.995455	1.96333
ZNF611	1.14	0.195	4.00667	2.12	2.63182	1.42333
ZNF613	0.366667	0.665	0.15	0.025	24.3282	20.9233
ZNF614	0.256667	0.24	0.323333	0.1375	10.0791	12.5067
ZNF615	0.436667	1.39	4.73667	2.735	3.09182	6.15
ZNF616	5	10.955	11.26	5.4875	16.6891	4.60333
ZNF618	24.5833	9.775	17.67	13.8875	1.22636	0.37
ZNF619	0.08	0.7	0.463333	1.7225	1.41818	0.25
ZNF620	0.936667	0.585	0	1.2625	4.48818	6.38333
ZNF621	0.0466667	0.44	0.39	0.395	3.97727	0.816667
ZNF622	0.02	0	0.0933333	9.665	110.827	49.1567
ZNF623	6.08667	9.49	6.74667	8.355	9.16909	3.07667
ZNF624	0.253333	1.26	1.43667	10.4725	0.540909	0.0633333
ZNF625	0.02	0	0	0.1175	9.79182	3.44667
ZNF626	3.74667	5.01	2.86	0.9825	2.87818	4.27667
ZNF627	0.936667	1.055	0.513333	0.3325	6.30091	1.04667
ZNF628	0.96	1.175	1.74	0.6175	2.66545	0.683333
ZNF629	0.16	0.51	0.526667	2.6875	0.500909	0.22
ZNF630	0	0	0	0.025	0.360909	0.246667
ZNF638	8.74667	5.31	15.72	27.665	10.9164	18.0567
ZNF639	3.66	6.465	5.71667	31.325	73.4418	71.72
ZNF641	8.26667	10.255	13.9233	14.4575	1.43636	3.22667
ZNF642	16.57	24.49	37.5067	81.7775	2.35545	5.76667
ZNF643	1.76	2.835	5.53	3.435	1.23182	11.77
ZNF644	0.18	0.105	1.19333	1.1825	2.33545	5.23333
ZNF646	1	1.215	1.68667	6.5375	0.791818	0.0666667
ZNF649	11.8267	6.97	22.14	28.7925	8.46636	12.0033
ZNF652	11.2567	12.45	13.34	18.76	2.33364	1.09333
ZNF653	0.0933333	0.195	0.266667	0.2625	0.0263636	0.02
ZNF654	29.39	20.415	44.7067	71.21	6.06091	2.72667
ZNF655	4.88	3.995	5.88333	6.935	7.32636	0.653333
ZNF660	0	0	0	0.025	0.844545	0
ZNF662	8.38	11.945	9.30667	7.8075	2.28909	0.746667
ZNF664	18.3967	25.065	21.41	25.12	3.46182	13.79
ZNF665	5.45667	1.075	2.67667	9.1125	7.40455	0.643333
ZNF667	0.686667	0.425	1.15	0.38	0.331818	1.45
ZNF668	0.01	0	0	0.13	31.49	4.80333
ZNF669	0.0166667	0.015	0.743333	2.85	119.054	5.82667
ZNF670	1.61	1.04	2.35667	16.7275	28.3327	24.9133
ZNF671	0.596667	1.065	2.73333	0.025	0.544545	1.2
ZNF672	9.62667	2.35	1.64333	3.6025	2.26727	5.07
ZNF673	0.04	0.225	0.03	0.6825	12.1455	5.76333
ZNF674	0.0766667	1.015	0.866667	0.265	0.201818	0.373333
ZNF675	0.826667	1.29	1.07667	1.3625	96.2909	110.727
ZNF676	0.996667	0.93	8.88333	1.7525	18.4482	26.67
ZNF677	3.30667	1.97	3.69333	2.5525	11.4573	5.55667
ZNF678	0.63	1.41	3.16667	1.1925	0.0163636	1.69333
ZNF679	0	0	0	0.025	25.0782	0.0733333
ZNF680	1.12	0.565	9.78	0.3475	7.89818	15.29
ZNF681	0.0366667	0.005	2.35667	0.2175	1.7	11.4667
ZNF682	6.60667	16.625	18.1933	16.635	9.17909	8.55333
ZNF683	0	0	0	0.025	1.10636	0
ZNF684	0.346667	4.18	1.89	0.4275	24.1536	20.3967
ZNF687	0.26	1.155	1.41	4.925	1.60273	0.15
ZNF688	0	0	0	0.025	0.383636	0.51
ZNF689	145.54	39.24	55.4933	44.785	24.7864	1.20333
ZNF691	1.84333	5.035	4.8	5.9825	18.35	12.9133
ZNF692	0.88	0.88	0.0233333	0.265	5.30636	6.22667
ZNF695	0.45	0.375	0.873333	0.025	0.36	2.87667
ZNF696	0	0.03	0	0.345	0.0309091	0.993333
ZNF697	1.10667	1.535	2.56333	4.325	0.387273	1.47
ZNF699	0.0233333	0.025	0	0.025	0.404545	0
ZNF7	0.796667	1.19	1.95	4.06	20.9536	23.8567
ZNF70	0.156667	0.225	0.226667	0.07	0.841818	0.00333333
ZNF700	0.0433333	3.255	2.96667	0.1975	23.0991	21.71
ZNF701	0.493333	1.03	1.34667	2.4025	9.12182	6.74333
ZNF703	0.00666667	0	0	1.52	5.59727	0.52
ZNF704	1.8	1.3	1.48333	10.81	0.11	0.0133333
ZNF705A	0	0	0	1.0175	3.73909	0
ZNF705G	0	0	0	0.025	0.689091	0
ZNF706	14.8567	14.125	7.48667	15.0225	5.86636	22.7367
ZNF707	1.74	0.815	0.85	0.405	42.5455	2.64
ZNF708	0	0	0	0.025	0.0536364	1.01333
ZNF709	0.223333	0.745	0.556667	0.025	1.9	3.74667
ZNF71	3.50333	1.455	1.98	0.9575	1.29273	0.31
ZNF710	0.223333	0.69	2.85667	0.56	1.30273	0.203333
ZNF711	0	0	0	0.025	0.670909	0.0366667
ZNF713	0.15	1.19	0	0.245	0.00545455	0.356667
ZNF714	0	0.02	0.566667	0.025	0.218182	0.0366667
ZNF716	0.13	0.64	0.14	0.79	9.04273	1.44
ZNF717	1.51	1.185	4.63	9.435	0.243636	0.00666667
ZNF718	0.14	0.12	0.243333	1.515	12.7564	6.86667
ZNF720	0.586667	0	0.103333	4.3925	0.0327273	0.0166667
ZNF721	13.6967	35.65	49.9867	106.15	7.68455	6.13667
ZNF727	1.27333	2.615	12.6033	33.0175	9.15273	0.806667
ZNF732	3.58333	9.12	15.9367	14.415	2.69909	1.49667
ZNF735	0	0	0	0.18	106.947	6.42333
ZNF736	0.383333	3.505	6.54	5.09	36.9982	3.24333
ZNF737	1.16667	2.795	6.73667	4.2825	2.14727	0.453333
ZNF74	1.28	0.235	0.243333	1.4375	0.22	0.913333
ZNF740	0.14	0.1	0.0333333	0.9275	0.0209091	0.27
ZNF746	5.67	6.525	8.23	5.1025	4.16727	5.41667
ZNF747	0.983333	2.93	0.596667	1.015	0.0572727	0.0533333
ZNF749	0.643333	0.465	0.266667	3.485	2.16182	1.92333
ZNF75A	0	2.77	0.116667	0.7225	12.2245	22.3867
ZNF75D	0.08	0	0	0.025	0.00545455	0.83
ZNF76	39.49	22.475	11.39	12.935	4.44364	3.1
ZNF761	41.66	97.05	127.967	104.392	5.50909	9.09667
ZNF763	3.65333	0.69	5.29333	2.28	2.86727	0.516667
ZNF764	3.40333	2.725	1.03333	1.2475	2.90818	7.49
ZNF765	11.57	21.915	27.66	17.99	4.46364	4.06333
ZNF766	15.5967	15.335	23.04	19.7975	19.6482	22.75
ZNF768	0.826667	0.105	0.0933333	0.5475	0.705455	0.496667
ZNF77	48.7233	50.755	36.35	8.575	17.8955	11.0367
ZNF770	5.35333	10.675	22.1567	9.5225	0.999091	9.78333
ZNF771	0.00666667	0	0	0.025	0.456364	0.663333
ZNF772	14.2967	19.43	23.0533	10.9625	4.51	1.83
ZNF773	30.7667	8.485	23.66	8.36	9.86545	4.37
ZNF774	0	0.005	0	0.025	0.395455	0.0733333
ZNF776	0.35	0.8	3.91333	1.1625	1.81455	1.34
ZNF777	2.99333	2.735	3.90333	4.4375	3.17636	0.71
ZNF778	1.77	2.86	4.73	0.42	11.26	1.74667
ZNF780A	0.113333	0.235	1.31	0.3975	0.00545455	0.746667
ZNF781	0.03	0.46	0.0366667	0.025	2.37909	1.60667
ZNF782	1.17	2.03	3.21667	1.8225	0.416364	0.72
ZNF784	0.86	1.565	0.11	0.1175	0.0554545	0.563333
ZNF785	0.01	0	0.0933333	0.025	0.101818	0
ZNF786	0.09	0.04	0.113333	0.485	0.118182	0.0633333
ZNF787	1.23667	1.925	0.886667	2.0175	2.70818	0.766667
ZNF789	0.0166667	0.31	0.826667	0.115	25.9055	19.58
ZNF79	1.89333	1.52	3.65	0.0775	38.3018	5.79667
ZNF790	0.00333333	0.09	1.08667	0.045	1.28909	0.83
ZNF791	1.40667	0.015	0.166667	1.31	17.0155	6.39
ZNF792	0.313333	1.865	0.04	6.7675	3.44909	0.67
ZNF793	0.206667	0.125	0.746667	0.205	1.14727	0.38
ZNF799	46.87	119.02	95.22	46.765	4.19818	1.13667
ZNF8	0.16	0.545	0.27	0.1875	8.77091	1.22333
ZNF800	0.45	0.88	3.89667	0.6325	1.27091	2.75333
ZNF804B	0.00666667	0.075	0.476667	0.0425	0.00545455	0
ZNF805	5.10333	4.11	4.56667	10.555	0.602727	1.92
ZNF808	0.65	2.955	8.31333	9.6725	1.19545	0.166667
ZNF813	3.52	5.05	10.6467	9.03	0.876364	0.646667
ZNF814	6.67667	18.7	15.0933	8.3775	4.65455	15.3
ZNF816A	8.38	14.485	17.4167	3.4775	20.2855	29.1167
ZNF821	32.83	16.15	14.2967	13.0625	12.6818	3.49333
ZNF823	4.51667	13.7	7.38333	11.335	62.1591	11.85
ZNF826	0	0	0	0.025	3.09818	0.773333
ZNF827	5.12333	0.83	2.44333	2.305	0.296364	0
ZNF828	11.3833	35.11	70.8533	61.1525	1.82273	0.286667
ZNF829	0.346667	1.68	4.41333	3.8575	2.44455	2.52667
ZNF83	2.30333	9.42	10.9533	8.345	3.11909	18.2733
ZNF830	9.72	12.76	39.9567	12.2325	69.9182	21.8467
ZNF835	0.226667	0.085	0	0.025	0.00545455	0
ZNF836	0.0766667	0.15	1.24	0.025	5.28455	0.876667
ZNF837	0.01	0	0	0.025	2.32909	0.0566667
ZNF839	1.37	0.88	1.18	3.195	2.21636	7.08667
ZNF84	3.76667	4.965	9.77	8.915	4.96	5.00667
ZNF841	0.373333	0.835	0.366667	0.025	4.12182	2.09333
ZNF843	0	0	0	0.025	0.61	0.0566667
ZNF844	5.39667	5.415	13.2733	8.6125	14.8673	4.88333
ZNF845	11.6267	25.025	23.3233	12.8725	12.1736	10.2167
ZNF846	0.263333	0.085	2.19	2.1925	1.02545	0.103333
ZNF85	2.96333	2.405	12.52	1.585	4.09727	15.2967
ZNF860	0.74	1.47	1.13667	2.405	0.570909	0.0166667
ZNF878	0	0	0.67	1.32	57.1564	0.516667
ZNF879	2.22667	5.6	3.86333	3.5975	0.999091	3.81333
ZNF880	1.86333	3.105	5.97	2.5475	20.5355	7.23
ZNF883	0.443333	1.355	0.493333	1.4975	0.978182	0.09
ZNF90	1.71	7.515	8.85	1.2975	8.12818	30.9
ZNF91	0.61	1.585	2.13667	1.76	6.91364	1.99
ZNF92	3.77	0.875	8.81333	1.4675	39.05	35.72
ZNF93	48.5733	98.495	89.93	76.4275	53.51	22.0067
ZNF98	0.16	0.69	0	0.0475	2.68273	0.666667
ZNF99	0.04	0.215	0.476667	1.3025	0.983636	0.143333
ZNFX1	2.24	1.325	1.11333	1.3225	15.9755	4.41667
ZNHIT1	1.38	0.775	0.583333	1.8575	90.81	64.2433
ZNHIT2	3.31667	5.29	2.56	2.3475	58.2345	19.56
ZNHIT3	425.383	459.305	344.14	353.467	541.401	173.013
ZNHIT6	0.593333	1.31	1.69667	13.94	16.3718	8.26333
ZNRD1	217.773	201.985	122.933	158.457	127.195	83.4567
ZNRF1	6.14667	5.665	6.27	1.9875	4.94364	6.14667
ZNRF2	9.42667	2.04	5.28333	2.7075	1.15909	0.766667
ZNRF3	0.46	0.295	0.473333	0.2575	1.23091	0.816667
ZRANB1	11.56	16.14	11.7333	22.31	25.7273	9.64667
ZRANB2	2.12667	1.755	0.943333	1.335	24.58	51.0367
ZRANB3	0.263333	0.725	3.17	0.2125	0.834545	3.12333
ZRSR2	1.98	1.85	0.923333	4.5875	1.27091	0.64
ZSCAN10	1.46667	0.68	0.213333	0.025	1.55636	0
ZSCAN12	0	0.02	0	0.025	2.39182	0.296667
ZSCAN16	7.15333	28.765	33.9933	43.655	1.05455	12.56
ZSCAN18	1.86333	1.27	1.85333	0.615	2.88727	5.85667
ZSCAN2	32.0133	39.775	9.28333	13.94	3.77273	1.52
ZSCAN20	0.00333333	0	0	0.025	0.988182	0.903333
ZSCAN21	66.7767	69.665	72.5967	51.195	7.79364	23.94
ZSCAN22	3.27	3.44	1.69333	6.8325	0.244545	2.21667
ZSCAN29	18.67	16.18	18.12	26.295	2.44	4.59
ZSCAN4	2.27	0.01	3.49	200.148	913.702	6.52333
ZSCAN5A	2.90667	7.675	11.4067	182.222	86.5518	11.7367
ZSCAN5B	0.306667	0.075	1.88	179.027	808.885	9.84
ZSWIM1	0.34	0.42	0.04	0.26	0.109091	0.276667
ZSWIM3	323.973	237.255	167.173	147.708	2.67818	6.89
ZSWIM4	2.84333	5.345	7.35	2.2175	4.44636	0.16
ZSWIM6	0	0	0	1.1	0.428182	0.126667
ZSWIM7	70.2933	67.045	31.8367	28.3275	25.3645	32.7267
ZUFSP	17.04	33.88	26.6833	17.855	8.44273	23.92
ZXDC	2.26333	2.755	2.01	1.14	0.116364	0.463333
ZZEF1	0.53	0.33	0.996667	0.4525	3.89636	0.123333
ZZZ3	2.69333	4.405	4.65667	8.8225	40.8273	11.5367
KLF1	0.223333	0	0	0.025	0.0990909	0
KLF10	0.0266667	0	0.263333	3.2375	18.8209	3.61333
KLF11	155.57	149.99	87.1333	66.3775	17.2227	11.7667
KLF12	2.78667	5	7.25	9.1025	1.10818	0.0566667
KLF13	0.116667	0.085	0.0333333	0.085	0.491818	1.98
KLF14	0.143333	1.085	0	0.025	0.0336364	0.32
KLF15	0.116667	0.065	0.0266667	0.025	0.00545455	0
KLF16	2.21667	2.545	0.44	2.7075	22.3773	3.11667
KLF17	0	0.005	0.28	3.0375	328.485	6.62667
KLF2	6.40667	7.58	2.84333	3.9675	0.132727	0
KLF3	0	0.005	0.123333	1.1625	5.47	26.9733
KLF4	0.373333	0.435	2.08333	3.15	43.7227	254.933
KLF5	43.9333	10.33	17.07	13.8125	134.966	142.833
KLF6	0.416667	0.03	0.133333	0.23	0.24	0.233333
KLF7	0.263333	0.055	0.0333333	3.9525	0.926364	0.14
KLF8	0	0	0	0.025	0.00545455	4.58333
KLF9	0	0	0	0.025	7.39455	9.51667
