# Supplementary material for: ZFP560 facilitates KAP1-dependent chromatin repression to regulate exit from totipotency
Source: Research Square preprint supplement (doi:10.21203/rs.3.rs-7290036/v1), 2025-08-25
Supplement: Supplementary file 4 [file 4e63e2b2ee5ce870cfcb8de8.xlsx]

## Sheet: Naive-Primed
name	E14_2i_1	E14_2i_2	E14_2i_3	E14_EpiLC_1	E14_EpiLC_2	E14_EpiLC_3	E14_SL_1	E14_SL_2	E14_SL_3
Zbbx	2	1	3	0	0	0	0	1	2
Zbed3	248	365	457	203	287	211	1090	968	1557
Zbed4	0	0	0	0	0	0	0	0	0
Zbed6	153	268	300	235	319	280	349	300	382
Zbp1	488	861	796	25	25	22	68	64	113
Zbtb1	12	27	24	213	287	210	44	45	60
Zbtb10	0	0	0	0	0	0	0	0	0
Zbtb11	76	97	152	144	138	119	58	56	71
Zbtb12	503	840	788	480	577	497	848	730	887
Zbtb14	238	325	535	387	466	412	470	384	636
Zbtb16	219	360	360	100	105	110	171	151	259
Zbtb17	108	166	184	25	36	24	66	54	70
Zbtb18	0	0	0	2	1	4	6	6	6
Zbtb2	0	0	0	0	0	0	0	0	0
Zbtb20	62	97	98	41	37	40	60	45	81
Zbtb21	501	772	751	420	564	457	775	678	882
Zbtb22	1	0	0	0	0	0	0	1	0
Zbtb24	0	0	0	0	0	0	0	0	0
Zbtb25	64	146	121	223	308	248	196	154	179
Zbtb26	381	511	617	300	430	368	1215	992	1792
Zbtb3	0	0	0	0	0	0	0	0	0
Zbtb32	0	0	0	0	0	0	0	0	0
Zbtb33	29	41	69	10	13	9	232	196	252
Zbtb34	0	0	0	0	0	0	0	0	0
Zbtb37	0	0	0	0	0	0	0	0	0
Zbtb38	108	133	167	48	51	62	229	188	312
Zbtb39	0	0	0	0	0	1	1	2	1
Zbtb4	0	0	0	0	0	0	0	0	0
Zbtb40	252	367	436	103	149	121	295	263	371
Zbtb41	0	0	0	1	0	0	0	0	0
Zbtb42	29	56	46	24	34	27	97	83	74
Zbtb43	0	0	0	0	0	0	0	0	0
Zbtb44	0	0	0	0	0	0	0	0	1
Zbtb45	2	6	12	3	4	0	0	0	1
Zbtb46	102	153	158	24	23	22	195	141	238
Zbtb48	0	0	0	0	0	0	0	0	0
Zbtb49	0	0	0	0	0	0	0	0	0
Zbtb5	3	4	7	7	7	6	9	8	12
Zbtb6	0	0	0	4	4	4	1	1	2
Zbtb7a	929	1309	1610	216	245	214	266	210	363
Zbtb7b	0	0	0	0	0	0	0	0	0
Zbtb7c	894	1384	1271	452	664	531	924	814	1163
Zbtb8a	0	0	0	0	0	0	0	0	0
Zbtb8b	2468	3809	3539	99	136	115	2484	1939	3228
Zbtb8os	21	37	52	44	66	66	51	30	68
Zbtb9	0	0	0	0	0	0	0	0	0
Zc2hc1a	0	0	0	0	0	0	0	0	0
Zc2hc1b	0	0	0	0	0	0	0	0	0
Zc2hc1c	0	0	0	0	0	0	0	0	1
Zc3h10	0	0	0	0	0	0	0	0	0
Zc3h12a	869	1352	1371	202	273	226	533	397	625
Zc3h12b	967	1448	2340	672	893	715	3595	2938	5477
Zc3h12c	14	16	40	16	27	23	39	39	69
Zc3h12d	1040	1752	1517	1295	1542	1283	1849	1461	2015
Zc3h13	0	0	0	0	0	0	0	0	0
Zc3h14	314	443	380	228	266	250	807	665	723
Zc3h15	0	0	0	0	0	0	0	0	0
Zc3h18	46	70	66	19	28	36	200	147	158
Zc3h3	0	0	0	0	0	0	0	0	0
Zc3h4	365	574	461	345	447	328	490	399	450
Zc3h6	3	2	8	4	7	4	10	10	12
Zc3h7a	464	750	621	1573	1882	1584	618	562	899
Zc3h7b	0	0	0	0	0	0	0	0	0
Zc3h8	0	0	0	0	0	0	0	0	0
Zc3hav1	9	17	12	3	2	2	8	2	7
Zc3hav1l	8	7	11	104	96	96	324	243	450
Zc3hc1	78	84	95	23	27	34	165	111	269
Zc4h2	406	584	688	240	314	265	448	360	557
Zcchc10	0	0	0	0	0	0	0	0	0
Zcchc12	8	11	8	7	11	10	1	4	4
Zcchc13	35	46	36	189	261	203	175	133	221
Zcchc14	462	695	1051	9	15	14	2726	2113	3392
Zcchc17	0	0	0	0	0	0	0	0	0
Zcchc18	816	1276	1188	1284	1637	1415	2094	1588	2166
Zcchc2	0	0	0	0	0	0	0	0	0
Zcchc24	0	0	0	0	0	0	0	0	0
Zcchc3	2570	3645	3871	2119	2714	2493	5860	4776	8096
Zcchc4	0	0	0	0	0	0	0	0	0
Zcchc7	0	0	1	0	4	0	0	1	3
Zcchc8	0	0	0	0	0	0	0	0	0
Zcchc9	37	66	54	33	49	42	92	63	67
Zcchc9-ps	0	2	1	1	1	0	1	2	0
Zcrb1	205	335	303	15	12	9	9	4	2
Zcwpw1	2	0	5	0	0	0	4	0	3
Zcwpw2	1025	1519	1471	1148	1274	1181	2586	2225	2750
Zdbf2	762	1195	1574	1038	1266	1155	830	710	1239
Zdhhc1	0	0	0	0	0	0	0	0	0
Zdhhc11	0	0	0	0	0	0	0	2	1
Zdhhc12	819	1371	1065	809	975	928	988	765	940
Zdhhc13	0	0	0	0	0	0	0	0	0
Zdhhc14	0	7	0	5	8	10	3	0	3
Zdhhc15	0	0	0	0	0	0	0	0	0
Zdhhc16	0	2	2	0	0	0	0	1	0
Zdhhc17	424	588	661	351	442	356	979	786	1150
Zdhhc18	0	0	0	0	0	0	0	0	0
Zdhhc19	0	1	0	0	0	0	1	2	1
Zdhhc2	0	0	0	0	0	0	0	0	0
Zdhhc20	1649	2162	2917	721	818	780	3311	2708	4111
Zdhhc21	75	125	89	76	100	77	239	177	222
Zdhhc22	714	1073	1144	206	290	249	801	654	928
Zdhhc23	87	100	132	82	116	123	159	123	181
Zdhhc24	0	0	0	0	0	0	0	0	0
Zdhhc25	0	0	0	0	0	0	0	0	0
Zdhhc3	0	0	0	0	0	0	0	0	0
Zdhhc4	748	1112	987	222	269	229	509	402	569
Zdhhc5	0	0	0	0	0	2	6	7	6
Zdhhc6	30	30	28	3	6	1	47	61	42
Zdhhc7	0	1	1	0	0	0	0	0	0
Zdhhc8	0	0	3	0	0	0	1	0	2
Zdhhc9	305	629	410	977	1246	925	331	297	321
Zeb1	0	0	0	0	0	0	0	0	0
Zeb2	0	0	0	0	0	0	0	0	0
Zeb2os	0	3	2	1	0	0	1	0	1
Zer1	61	65	71	57	74	62	170	141	201
Zfand1	0	0	1	0	0	0	0	0	1
Zfand2a	0	0	0	0	0	0	0	0	0
Zfand2b	0	0	0	0	0	0	0	0	0
Zfand3	1951	2485	2942	1377	1527	1561	5869	4814	6708
Zfand4	0	0	0	0	0	0	0	0	0
Zfand5	0	0	0	0	0	0	0	0	0
Zfand6	0	0	0	0	0	0	0	0	0
Zfa-ps	727	1185	966	1396	1602	1368	1526	1222	1531
Zfas1	879	1297	1252	1367	1664	1409	1250	1040	1282
Zfat	0	0	0	0	0	0	0	0	0
Zfc3h1	0	0	0	0	0	0	0	0	0
Zfhx2	0	0	0	0	0	0	0	0	0
Zfhx2os	28	50	38	28	25	13	43	34	37
Zfhx3	0	0	0	0	0	0	0	0	1
Zfhx4	0	0	0	0	1	0	0	0	0
Zfp1	0	0	0	0	0	0	0	0	0
Zfp101	78	145	128	770	902	858	238	202	353
Zfp105	0	0	0	0	0	0	0	0	0
Zfp106	4	9	13	3	2	0	11	13	20
Zfp108	13	22	17	10	4	4	1	3	2
Zfp109	548	962	748	1591	1849	1629	527	404	570
Zfp11	1157	1658	1786	1551	1910	1570	1846	1522	2620
Zfp110	1	1	0	0	0	0	0	1	2
Zfp111	0	0	0	0	0	0	0	0	0
Zfp112	0	0	0	0	0	0	0	0	0
Zfp113	0	0	0	0	0	0	0	0	0
Zfp114	0	0	0	0	0	0	0	0	0
Zfp119a	8	14	7	8	9	10	10	15	15
Zfp119b	0	0	0	0	0	0	0	0	1
Zfp12	0	0	0	0	0	0	0	0	0
Zfp120	0	0	0	0	0	0	0	0	0
Zfp125	0	0	0	1	0	0	1	1	0
Zfp128	0	0	0	0	0	0	0	0	0
Zfp13	584	906	1043	925	1182	920	1515	1339	2051
Zfp131	1	18	5	2	3	6	9	5	5
Zfp133-ps	0	0	0	0	0	0	0	0	0
Zfp14	0	0	0	0	0	0	0	0	0
Zfp141	1278	1903	2572	1303	1598	1404	6180	5140	9067
Zfp142	0	0	0	1	0	0	0	0	0
Zfp143	50	68	87	9	13	8	53	48	67
Zfp146	387	617	526	789	1023	810	584	485	534
Zfp148	0	0	0	0	0	0	0	0	0
Zfp157	1	4	4	1	3	1	1	4	4
Zfp160	1	2	1	1	3	0	5	1	8
Zfp169	0	0	0	0	0	0	0	0	0
Zfp174	223	393	344	193	240	192	241	231	275
Zfp180	33	61	60	8	15	6	47	37	65
Zfp182	0	0	0	0	0	0	0	0	0
Zfp184	0	0	0	0	0	0	0	0	0
Zfp185	67	97	90	141	176	135	98	65	72
Zfp189	0	0	0	0	0	0	0	0	0
Zfp2	55	106	142	2	3	3	5	2	12
Zfp202	16	14	25	6	8	5	39	23	49
Zfp207	0	0	0	0	0	0	0	0	0
Zfp212	368	644	405	1051	1294	1098	430	352	435
Zfp213	0	0	0	0	0	0	0	0	0
Zfp217	0	0	2	0	0	0	2	0	1
Zfp219	238	334	375	185	188	226	442	353	517
Zfp229	0	3	0	0	0	0	0	2	0
Zfp235	600	757	915	219	263	260	1772	1370	2438
Zfp236	0	1	0	1	0	1	2	1	2
Zfp239	0	0	0	0	0	0	0	0	0
Zfp24	92	142	126	24	32	32	113	96	147
Zfp248	0	0	0	0	0	0	0	0	0
Zfp251	0	0	1	1	0	1	0	0	1
Zfp26	0	0	0	0	0	0	0	0	0
Zfp260	27	26	25	4	2	7	22	4	19
Zfp263	2	2	5	0	0	0	1	0	4
Zfp266	152	143	207	61	74	47	293	253	345
Zfp267	0	0	2	0	0	0	1	0	3
Zfp268	0	0	0	0	0	0	0	0	0
Zfp27	1035	1581	1888	339	434	372	434	345	573
Zfp273	0	0	0	0	0	0	0	0	0
Zfp275	8	13	10	95	119	106	17	16	19
Zfp276	0	1	2	1	5	2	2	2	4
Zfp277	0	0	0	0	0	0	0	0	0
Zfp28	405	489	808	179	201	174	1682	1447	2126
Zfp280b	0	6	2	0	0	0	8	4	11
Zfp280c	1	0	1	4	4	6	0	0	1
Zfp280d	0	0	0	0	0	0	0	0	0
Zfp281	1	5	2	3	5	2	9	10	4
Zfp282	1	3	2	2	3	1	13	9	19
Zfp286	1	0	0	0	0	0	1	2	1
Zfp286os	0	0	0	0	0	0	0	0	0
Zfp287	0	2	4	1	1	2	0	1	2
Zfp292	329	540	429	168	196	146	526	481	818
Zfp296	0	1	0	0	0	0	0	0	2
Zfp3	0	0	0	0	0	0	0	0	0
Zfp30	0	1	1	1	0	1	1	2	0
Zfp300	0	0	0	0	0	0	0	0	0
Zfp316	1	3	1	0	0	0	0	0	0
Zfp317	0	0	0	0	0	0	0	0	0
Zfp318	919	1189	1898	340	352	321	2522	2083	3259
Zfp319	0	0	0	0	1	0	0	0	0
Zfp322a	0	0	0	0	0	0	0	0	0
Zfp324	0	1	0	0	1	1	1	0	0
Zfp326	0	5	4	5	0	2	3	3	5
Zfp329	0	0	2	1	3	2	0	0	0
Zfp330	0	0	0	0	0	0	0	0	0
Zfp334	0	0	0	0	0	0	0	0	0
Zfp335	4	4	5	16	17	11	6	4	8
Zfp335os	0	0	0	0	0	0	0	0	0
Zfp341	33	40	54	17	11	10	69	64	88
Zfp345	170	226	258	82	91	93	280	246	392
Zfp346	0	0	0	0	0	0	0	0	0
Zfp35	1	2	0	0	0	0	1	0	1
Zfp352	0	0	0	0	0	0	0	0	0
Zfp353-ps	1	0	0	1	0	0	0	1	0
Zfp354a	0	0	0	0	0	0	0	0	0
Zfp354b	0	0	0	0	0	0	0	0	0
Zfp354c	0	0	0	0	0	0	0	1	0
Zfp358	211	305	462	85	114	125	336	303	483
Zfp36	477	793	529	309	411	327	518	429	464
Zfp362	0	0	0	0	0	0	0	0	0
Zfp365	0	0	0	0	0	0	0	0	0
Zfp366	0	0	0	0	0	0	0	0	0
Zfp367	329	440	1072	23	34	17	3	4	2
Zfp369	588	1008	773	80	109	94	83	69	112
Zfp36l1	13	8	10	11	27	22	7	7	7
Zfp36l1-ps	148	223	294	89	109	96	298	250	350
Zfp36l2	0	0	0	0	0	0	0	0	0
Zfp36l3	33	51	42	46	83	53	71	67	93
Zfp37	0	0	0	0	0	0	0	0	0
Zfp382	551	855	962	677	802	674	1415	1152	1650
Zfp384	0	0	0	0	0	0	0	0	0
Zfp385a	0	0	0	0	0	0	0	0	0
Zfp385b	0	0	0	1	4	3	6	2	2
Zfp385c	0	0	0	0	1	0	0	0	0
Zfp386	3	1	9	2	7	5	8	5	8
Zfp389	0	0	0	0	0	0	0	0	0
Zfp39	0	0	0	0	0	0	0	0	0
Zfp395	648	1219	818	2226	2947	2199	643	526	499
Zfp397	63	85	77	32	39	29	78	52	101
Zfp398	3	2	1	0	2	2	0	5	1
Zfp40	0	0	0	0	0	0	0	0	0
Zfp407	13	27	23	14	12	19	113	93	141
Zfp408	718	1096	1098	205	254	240	1243	1035	1553
Zfp41	0	0	0	0	0	0	0	0	0
Zfp410	1	2	3	2	1	0	0	0	1
Zfp414	398	605	662	254	326	293	977	800	1121
Zfp418	66	76	131	31	38	25	50	48	69
Zfp419	225	352	320	200	278	196	410	368	559
Zfp42	0	0	0	0	0	0	0	0	0
Zfp420	0	0	0	0	0	0	0	0	0
Zfp422	177	361	224	668	868	711	257	204	210
Zfp422-ps	0	0	0	0	0	0	0	0	0
Zfp423	0	2	0	8	5	5	5	3	12
Zfp426	1	1	0	0	0	0	1	0	0
Zfp428	29	46	52	9	16	15	109	78	162
Zfp429	1	0	0	0	0	0	0	0	0
Zfp433	238	372	317	292	354	267	365	279	354
Zfp438	15	21	24	12	29	21	27	29	46
Zfp442	0	0	0	0	0	0	0	0	0
Zfp444	31	55	43	57	51	40	47	53	58
Zfp445	0	0	0	0	0	0	0	0	0
Zfp446	0	0	0	0	0	0	0	0	0
Zfp449	0	0	0	0	0	0	0	0	0
Zfp451	358	584	603	308	375	298	922	774	1324
Zfp454	13	11	17	2	6	4	38	24	55
Zfp455	63	105	93	23	29	18	73	64	105
Zfp456	188	289	433	20	19	27	232	191	293
Zfp457	0	0	0	0	0	0	0	0	0
Zfp458	0	0	0	0	0	0	0	0	0
Zfp459	0	0	0	0	0	0	0	1	0
Zfp46	9	4	13	10	20	14	9	12	21
Zfp462	1	1	1	1	0	1	0	0	0
Zfp467	95	104	163	32	51	35	124	102	168
Zfp469	21	35	32	0	2	3	61	54	74
Zfp472	0	0	0	0	0	0	0	0	0
Zfp473	1	0	5	0	0	1	0	1	1
Zfp474	98	120	166	93	88	85	122	92	129
Zfp488	838	1099	1220	643	747	672	3507	2767	3964
Zfp493	0	2	1	0	0	0	3	2	3
Zfp503	379	588	585	320	380	338	657	519	819
Zfp507	0	0	0	0	0	0	0	0	0
Zfp51	41	45	84	13	28	21	45	45	63
Zfp511	2744	4332	3852	3674	4802	4306	3421	2692	4268
Zfp512	5	3	5	9	10	11	30	15	22
Zfp512b	0	0	0	0	0	0	0	0	0
Zfp513	557	948	832	2264	2870	2505	1627	1386	1864
Zfp516	0	0	0	0	0	0	0	0	0
Zfp518a	0	0	0	0	0	0	0	0	0
Zfp518b	0	0	0	0	0	0	0	0	0
Zfp52	0	0	0	0	0	0	0	0	0
Zfp521	627	1036	1165	832	900	902	555	447	683
Zfp523	0	0	0	0	0	0	0	0	0
Zfp524	0	0	0	0	0	0	0	0	0
Zfp526	0	0	1	0	0	0	0	1	1
Zfp53	0	2	2	6	6	5	2	5	1
Zfp532	36	57	98	58	55	50	53	46	82
Zfp534	3	8	9	27	60	47	41	38	58
Zfp536	0	0	0	0	0	0	0	0	0
Zfp54	0	0	0	0	0	0	0	0	0
Zfp541	174	204	308	519	551	505	1111	890	1540
Zfp551	0	0	0	0	1	3	6	4	2
Zfp553	11	11	20	22	33	22	11	20	27
Zfp558	4	5	2	6	8	7	2	1	1
Zfp560	568	852	860	470	546	483	1509	1144	1786
Zfp563	0	0	0	0	0	0	0	0	0
Zfp566	0	0	0	0	0	0	0	0	0
Zfp568	1	7	5	4	8	7	19	19	28
Zfp57	209	304	274	465	596	690	267	213	263
Zfp574	548	1047	744	1241	1597	1425	661	509	473
Zfp575	2	2	3	0	0	0	0	0	1
Zfp579	0	0	0	0	0	0	0	0	0
Zfp58	6	25	26	4	5	5	21	19	33
Zfp580	0	0	0	0	0	0	0	0	0
Zfp583	0	0	0	0	0	0	0	0	0
Zfp59	1037	1872	1373	2049	2713	2408	1000	859	1280
Zfp592	0	0	0	0	0	0	1	0	0
Zfp593	0	0	0	0	0	0	0	0	0
Zfp595	29	18	28	73	74	84	929	746	943
Zfp597	2	1	1	1	1	1	2	3	4
Zfp598	0	0	0	0	0	0	0	0	0
Zfp599	1	0	0	1	1	0	1	1	0
Zfp60	413	651	812	326	395	356	1495	1145	1766
Zfp600	2246	3408	2822	2347	2828	2438	4068	3275	3949
Zfp605	1	0	2	1	3	2	21	16	21
Zfp606	0	0	0	0	0	0	0	0	0
Zfp607a	583	1039	856	99	139	121	310	260	285
Zfp607b	1229	1964	1653	1517	1865	1612	594	448	643
Zfp608	0	0	0	0	0	0	0	0	0
Zfp609	0	0	0	0	0	0	0	0	0
Zfp61	0	0	0	0	0	0	0	0	0
Zfp612	1	0	0	2	0	1	2	2	2
Zfp616	1	1	0	26	28	37	7	5	6
Zfp617	3472	5729	4336	3910	5043	4629	6532	5334	5758
Zfp618	0	0	0	0	0	0	0	1	0
Zfp619	0	0	0	0	0	0	0	0	0
Zfp62	0	0	0	0	0	0	0	0	0
Zfp622	0	0	0	0	0	0	0	0	0
Zfp623	406	581	909	602	738	662	1761	1393	2575
Zfp626	12	14	12	0	0	2	9	7	5
Zfp628	180	302	284	473	661	787	228	190	168
Zfp629	105	225	199	433	588	471	150	148	214
Zfp637	0	0	0	0	0	0	0	0	0
Zfp638	65	117	74	182	202	152	107	84	72
Zfp639	3	4	1	3	3	1	3	2	1
Zfp64	3963	7287	5048	10954	13992	10898	3261	2945	3167
Zfp640	34	45	35	17	15	11	39	38	53
Zfp641	127	202	193	58	84	68	146	136	210
Zfp644	6	13	11	0	0	0	0	0	0
Zfp646	0	0	0	0	0	0	0	0	0
Zfp647	217	335	314	581	687	645	244	178	223
Zfp648	21	10	26	28	44	28	19	16	33
Zfp65	0	0	0	0	0	0	0	0	0
Zfp651	3	3	3	5	14	5	2	1	1
Zfp652	0	0	0	0	0	0	0	0	0
Zfp652os	0	0	0	0	0	0	0	0	0
Zfp653	5	1	1	4	13	3	6	2	6
Zfp654	188	319	264	110	143	90	214	178	254
Zfp655	89	131	142	28	36	40	85	107	142
Zfp658	0	0	0	0	0	0	1	0	1
Zfp661	113	186	141	17	17	9	114	104	187
Zfp663	868	1643	1039	2061	2762	1965	666	640	774
Zfp664	1272	2004	1753	1549	1817	1664	3377	2739	3388
Zfp667	0	0	0	0	0	0	0	0	0
Zfp668	3	2	3	0	1	0	19	17	18
Zfp672	0	0	0	0	0	0	0	0	0
Zfp677	163	363	218	573	671	514	192	133	178
Zfp68	25	52	51	4	11	5	59	48	75
Zfp683	2	3	4	1	2	2	0	0	0
Zfp687	0	1	0	0	0	0	0	0	0
Zfp688	0	0	0	0	0	0	0	0	0
Zfp689	3	7	5	4	7	7	8	9	17
Zfp69	5533	8898	7453	6900	8603	6923	10247	8253	11707
Zfp691	0	0	0	0	0	0	0	0	0
Zfp692	351	546	683	225	282	231	1186	901	1354
Zfp697	91	179	192	436	544	475	147	152	236
Zfp7	0	0	0	0	0	0	0	0	0
Zfp703	0	0	0	0	0	0	0	0	0
Zfp704	8	8	25	0	3	0	14	5	10
Zfp706	0	1	16	3	17	12	8	14	20
Zfp707	0	0	0	0	0	0	0	0	0
Zfp708	0	0	0	0	0	0	0	0	0
Zfp709	0	0	0	0	0	0	0	0	0
Zfp710	7	11	17	1	5	1	12	8	5
Zfp711	241	377	399	258	327	266	388	352	449
Zfp712	0	0	0	0	0	0	0	0	0
Zfp715	10	10	11	0	0	0	0	1	0
Zfp719	0	0	0	0	0	0	1	0	0
Zfp72	0	0	0	0	0	0	0	0	0
Zfp729a	1656	2322	2079	1418	1593	1413	3425	2843	3387
Zfp729b	0	0	0	0	0	0	0	0	0
Zfp735	183	214	293	118	134	162	513	377	633
Zfp738	45	72	71	11	7	9	46	33	56
Zfp74	36	74	71	37	44	61	149	115	167
Zfp740	239	291	555	206	237	235	887	740	1128
Zfp746	13	8	8	9	18	16	16	18	18
Zfp747	0	0	0	0	0	0	0	0	0
Zfp748	0	1	4	0	0	0	0	1	0
Zfp750	1	1	1	1	1	0	0	0	1
Zfp758	0	0	0	0	0	0	0	0	0
Zfp759	0	0	0	0	0	0	0	0	0
Zfp760	416	638	797	393	440	490	941	820	1083
Zfp763	0	1	1	0	0	0	2	1	1
Zfp764	648	1013	1027	528	686	474	783	656	987
Zfp768	0	0	0	0	0	0	0	0	0
Zfp770	346	530	678	476	408	370	2609	2164	3377
Zfp771	290	605	422	211	265	216	175	132	173
Zfp772	9	8	26	0	0	0	1	3	2
Zfp773	0	1	1	1	2	2	0	1	1
Zfp775	0	0	0	0	0	0	0	0	0
Zfp777	0	0	0	0	0	0	0	0	0
Zfp78	13	6	26	14	8	10	6	3	6
Zfp780b	1	5	15	0	0	0	9	13	21
Zfp781	0	1	3	15	15	8	7	2	5
Zfp783	2847	5081	3685	4998	7217	5444	2917	2811	3875
Zfp784	85	134	131	127	164	133	143	146	162
Zfp786	0	0	1	0	0	0	1	1	2
Zfp787	495	804	862	510	621	557	962	741	1081
Zfp788	144	210	308	106	112	109	341	274	493
Zfp790	0	0	0	0	0	0	0	0	0
Zfp791	21	27	31	239	305	230	99	72	132
Zfp799	252	431	354	368	435	331	628	473	545
Zfp800	0	0	0	0	0	0	0	0	0
Zfp804a	0	0	0	1	0	0	0	1	0
Zfp804b	0	0	0	0	0	0	0	0	0
Zfp808	0	0	0	0	0	0	1	0	0
Zfp809	17	29	18	17	29	20	85	65	94
Zfp81	74	151	123	16	13	21	26	38	39
Zfp810	0	0	0	0	0	0	1	0	1
Zfp811	2191	2967	3480	2426	2847	2597	5412	4214	6810
Zfp819	0	0	0	0	0	0	0	0	0
Zfp820	0	0	0	0	0	0	0	0	0
Zfp821	0	0	0	0	0	0	0	0	0
Zfp825	0	0	0	0	0	0	0	0	0
Zfp827	1554	2092	2973	873	1069	1074	5368	4214	7490
Zfp830	0	0	1	0	0	0	0	0	0
Zfp831	0	0	0	0	0	0	0	0	0
Zfp839	0	0	0	1	0	1	0	0	0
Zfp84	0	0	0	0	0	0	0	0	1
Zfp846	653	947	974	1018	1217	991	2941	2362	3200
Zfp85	0	0	0	0	0	0	0	0	0
Zfp850	0	1	0	0	0	0	0	2	3
Zfp853	1	2	2	0	0	0	0	0	1
Zfp85os	0	1	0	1	1	4	0	0	3
Zfp865	519	716	955	376	393	367	1127	905	1512
Zfp866	43	54	89	4	8	4	33	32	44
Zfp867	0	0	0	0	0	0	1	0	0
Zfp868	0	0	0	0	0	0	0	0	0
Zfp869	0	0	0	1	0	0	1	0	1
Zfp87	0	0	0	0	0	0	0	0	0
Zfp870	0	0	0	0	0	0	0	0	0
Zfp871	38	75	72	38	49	32	70	69	120
Zfp872	0	1	3	0	0	1	6	3	3
Zfp873	391	518	744	431	475	495	5944	4825	7692
Zfp874a	0	0	0	0	0	0	0	0	0
Zfp874b	0	0	0	0	1	0	12	13	8
Zfp879	10	11	28	8	11	6	9	9	10
Zfp882	0	0	0	0	0	0	0	0	0
Zfp9	497	741	669	510	707	567	877	718	720
Zfp90	0	0	0	0	0	0	0	0	0
Zfp91	0	0	0	0	0	0	0	0	0
Zfp92	185	263	279	205	226	192	478	404	545
Zfp93	0	0	0	0	0	0	0	0	0
Zfp930	9	7	5	0	3	0	18	10	17
Zfp931	0	0	0	0	0	0	0	0	0
Zfp932	957	1319	1690	1108	1373	1219	2865	2306	3907
Zfp933	0	0	0	0	0	0	0	0	0
Zfp934	0	0	0	3	4	0	3	3	3
Zfp936	4	7	5	17	35	25	37	25	60
Zfp937	0	0	0	0	0	0	0	0	0
Zfp938	11	17	8	5	5	5	19	18	15
Zfp939	0	0	0	0	0	0	0	0	0
Zfp94	3	4	1	5	9	9	20	14	21
Zfp940	1	6	6	156	174	142	36	39	35
Zfp941	0	0	0	0	0	0	0	0	0
Zfp942	6	5	8	2	2	5	14	7	12
Zfp943	6	19	6	5	10	5	14	5	7
Zfp944	1621	2283	2776	679	779	813	5205	4377	6935
Zfp945	254	293	504	154	154	164	1081	900	1451
Zfp946	0	0	0	0	0	0	0	0	0
Zfp947	333	509	346	1443	1935	1450	225	192	282
Zfp948	4	4	2	2	3	0	2	0	0
Zfp949	1184	1383	2095	95	77	117	1314	1097	1559
Zfp950	696	1115	1026	874	1096	937	1216	929	1346
Zfp951	460	669	734	352	373	350	1254	1013	1339
Zfp952	5	4	3	4	3	0	1	2	1
Zfp954	0	0	0	0	0	0	0	0	0
Zfp955a	77	168	219	169	213	164	218	216	353
Zfp955b	0	0	1	0	0	0	8	5	7
Zfp956	0	0	0	0	0	0	0	0	0
Zfp957	0	0	0	0	0	0	0	0	0
Zfp958	0	0	0	0	0	0	0	0	0
Zfp959	0	0	0	0	0	0	0	0	0
Zfp960	0	0	0	0	0	0	0	0	0
Zfp961	19	45	27	48	73	66	45	53	54
Zfp963	0	0	0	0	0	0	0	0	0
Zfp964	28	64	42	89	101	100	167	134	166
Zfp965	0	0	0	0	0	0	0	0	0
Zfp966	415	494	647	140	127	147	843	668	1023
Zfp967	15	30	42	72	69	53	50	54	70
Zfp968	4	13	4	16	21	18	34	43	58
Zfp968-ps	0	0	0	0	0	0	0	0	0
Zfp969	0	0	0	0	0	0	0	0	0
Zfp97	0	1	0	0	0	0	0	0	0
Zfp970	0	3	3	1	0	0	11	7	8
Zfp971	0	0	0	0	0	0	0	0	0
Zfp972	0	0	0	0	0	0	0	0	0
Zfp973	671	986	1173	641	820	815	3984	3282	4918
Zfp974	504	715	707	342	431	387	693	593	873
Zfp975	0	1	0	4	10	5	1	1	3
Zfp976	0	1	0	1	0	3	0	0	0
Zfp977	4053	5638	7189	7556	9547	8257	12624	10481	15980
Zfp978	343	548	680	93	77	88	247	200	310
Zfp979	570	882	906	342	459	388	342	243	457
Zfp980	436	558	652	143	194	210	598	562	595
Zfp981	0	0	0	0	0	0	0	0	0
Zfp982	260	425	401	492	597	525	518	480	609
Zfp983	35	71	90	18	27	19	42	51	63
Zfp984	22	24	29	31	47	37	28	43	56
Zfp985	1	1	1	1	0	2	6	2	6
Zfp986	0	0	0	0	0	0	1	0	1
Zfp987	0	0	0	0	0	0	0	0	0
Zfp988	66	88	96	28	34	36	138	125	200
Zfp989	0	0	1	1	1	0	1	0	1
Zfp990	0	0	0	0	0	0	0	1	0
Zfp991	0	0	0	0	0	0	0	0	0
Zfp992	0	0	0	0	0	0	0	0	0
Zfp993	0	0	0	1	2	1	3	4	7
Zfp994	0	0	0	0	0	0	0	0	0
Zfp995	382	471	457	252	331	260	637	531	768
Zfp997	0	0	0	0	0	0	0	0	0
Zfp998	0	0	0	0	0	0	0	0	0
Zfpl1	575	913	731	934	1073	979	945	753	822
Zfpm1	8	17	12	20	26	28	12	15	18
Zfpm2	0	0	4	0	0	0	2	0	3
Zfr	36	56	41	67	97	69	78	71	66
Zfr2	544	905	795	208	299	223	445	406	476
Zfta	43	83	51	257	326	285	110	84	115
Zfx	0	0	0	0	0	0	0	0	0
Zfy1	316	437	470	355	514	427	656	508	863
Zfy2	0	0	0	0	0	0	0	0	0
Zfyve1	25	38	46	95	132	92	221	186	346
Zfyve16	0	0	2	0	0	0	1	0	6
Zfyve19	0	0	0	0	0	0	0	0	0
Zfyve21	3	2	0	0	0	0	1	1	0
Zfyve26	1	0	0	3	2	1	18	10	24
Zfyve27	0	0	0	0	0	0	0	0	0
Zfyve28	16	28	33	28	32	26	308	280	378
Zfyve9	0	0	0	0	0	0	0	0	0
Zhx1	0	4	3	0	1	1	39	33	47
Zhx2	3	14	12	0	0	1	39	21	39
Zhx3	0	2	3	0	1	1	1	2	3
Zic1	334	544	624	115	158	118	306	293	424
Zic2	641	960	1009	306	380	331	1585	1318	1987
Zic3	0	0	0	0	0	0	0	0	0
Zic4	4	9	8	5	2	3	3	3	6
Zic5	0	0	0	0	0	0	0	0	0
Zik1	0	0	0	0	0	0	0	0	0
Zim1	0	0	0	0	0	0	0	0	0
Zkscan1	277	470	316	789	893	739	473	437	390
Zkscan14	0	0	0	0	0	0	0	0	0
Zkscan16	2	2	4	4	5	8	0	0	1
Zkscan17	0	0	0	0	0	0	0	0	0
Zkscan2	0	0	2	0	0	0	0	0	0
Zkscan3	2	4	5	3	1	3	3	2	4
Zkscan4	0	0	0	0	0	0	0	0	0
Zkscan5	0	0	0	0	0	0	0	0	0
Zkscan6	14	11	8	0	1	1	10	11	14
Zkscan7	701	996	912	1758	2397	2234	1191	1045	1117
Zkscan8	0	0	0	0	0	0	0	0	0
Zmat1	1	0	0	0	0	0	0	0	0
Zmat2	0	0	0	0	0	0	0	0	0
Zmat3	0	0	0	0	0	0	0	1	0
Zmat4	0	0	0	0	2	0	0	0	1
Zmat5	905	1376	1429	428	591	469	778	622	957
Zmiz1	0	0	1	0	0	0	0	1	0
Zmiz1os1	1	0	0	3	0	4	1	1	0
Zmiz2	1	6	1	101	129	110	22	15	26
Zmpste24	0	0	0	0	0	0	0	0	0
Zmym1	0	0	0	0	0	0	0	0	0
Zmym2	12	8	21	6	2	4	3	3	5
Zmym3	120	240	307	40	38	34	119	113	176
Zmym4	598	933	910	867	1159	943	1268	1072	1835
Zmym5	0	2	0	1	1	0	0	1	4
Zmym6	0	0	0	0	0	0	1	0	1
Zmynd10	0	0	0	0	0	0	0	0	0
Zmynd11	408	651	536	740	975	757	231	208	271
Zmynd12	0	0	0	0	0	0	0	0	0
Zmynd15	0	0	0	0	0	0	0	0	3
Zmynd19	548	945	853	15	18	18	21	16	24
Zmynd8	9	9	15	0	0	0	8	8	10
Znf41-ps	96	99	136	20	19	14	206	195	195
Znfx1	112	180	142	21	29	24	155	121	180
Znhit1	0	0	0	0	0	0	0	0	0
Znhit2	66	111	131	68	74	57	145	120	138
Znhit3	0	0	0	0	0	0	0	0	0
Znhit6	481	772	734	295	348	290	834	729	942
Znrd2	381	566	608	392	473	375	654	547	725
Znrf1	0	0	0	0	0	0	0	0	0
Znrf2	98	181	87	331	412	274	66	66	87
Znrf3	0	0	0	0	0	0	0	0	0
Znrf4	0	0	0	0	0	0	0	0	0
Zranb1	615	909	986	178	205	152	192	157	299
Zranb2	231	428	359	929	1080	881	455	427	650
Zranb3	0	3	2	50	47	32	7	3	4
Zrsr1	133	187	235	4	10	6	72	62	109
Zrsr2	755	1132	1590	1008	1281	1093	1695	1287	1854
Zscan10	0	0	0	0	0	0	0	0	0
Zscan12	375	536	766	316	401	354	1956	1529	2780
Zscan18	126	199	190	638	914	759	70	74	106
Zscan2	1104	1562	1402	1258	1660	1268	2182	1759	2436
Zscan20	0	0	0	0	0	0	0	0	0
Zscan21	0	0	1	3	1	1	4	1	1
Zscan22	1061	1334	1821	871	937	1017	2450	1935	3085
Zscan25	0	0	0	0	0	0	0	0	0
Zscan26	0	0	0	0	0	0	0	0	0
Zscan29	0	0	0	0	0	0	0	0	0
Zscan30	703	885	1130	471	487	450	2388	1884	2944
Zscan4b	0	0	0	0	0	0	0	0	0
Zscan4c	0	0	0	0	0	0	0	0	0
Zscan4d	0	0	0	0	0	0	0	0	0
Zscan4e	194	268	308	269	287	278	764	614	644
Zscan4f	5	4	5	2	0	3	7	4	11
Zscan5b	0	0	0	0	0	0	0	0	0
Zswim1	0	0	0	0	0	0	0	0	0
Zswim2	0	0	0	0	0	0	0	0	0
Zswim3	0	0	0	0	0	0	0	0	0
Zswim4	3	2	8	1	2	2	4	2	5
Zswim5	0	0	0	0	0	0	0	0	0
Zswim6	708	1020	1288	365	415	363	6137	4956	7339
Zswim7	0	0	0	0	0	0	0	0	0
Zswim8	584	998	1172	586	808	619	762	662	940
Zswim9	154	223	326	50	62	64	197	160	334
Zup1	173	316	234	313	423	350	277	215	210
Zxdb	0	0	0	0	0	0	0	0	0
Zxdc	5	8	11	4	4	3	7	3	9
Zzef1	0	0	0	0	0	0	0	0	0
Zzz3	0	0	0	0	0	0	0	0	0
