# Supplementary material for: ZFP560 facilitates KAP1-dependent chromatin repression to regulate exit from totipotency
Source: Research Square preprint supplement (doi:10.21203/rs.3.rs-7290036/v1), 2025-08-25
Supplement: Supplementary file 5 [file 6673f6f8a0e598eae4bd593d.xlsx]

## Sheet: Sheet1
Gene sets used for GSEA, related to Figures 2, 3, 5, and Supplementary Figures 1, 2.
2C genes	Totipotent genes	Pluripotent genes	Minor-ZGA	Major-ZGA	Primed	Naïve	Heterochromatin organization	Facultative heterochromatin formation	P53 pathway
Gene	Gene	Gene	Gene	Gene	Gene	Gene	Gene	Gene	Gene
Unc5b	Ncoa2	Gm37569	Plekhg3	Zfp710	Hes6	Fam129a	Aicda	Aicda	Btg1
Tmem92	Eya1	Cnga3	Plekhg1	Mark4	Prkar2b	Crebrf	Apobec1	Apobec1	Tob1
Slc9a6	Gm28784	1700019A02Rik	Tubal3	Dusp14	Six1	Map1a	Atf7ip	Atf7ip	Abat
Ubtfl1	Rims1	Fn1	Sorbs1	Hpse2	Pxdc1	Robo1	Atf7ip2	Atf7ip2	Cd81
Dppa4	Adgrb3	Apol7d	Tshz1	Zfp335	Marveld2	Gabbr1	Atrx	Baz2a	Sesn1
Tktl1	4931428L18Rik	Tns1	Mcemp1	Gtf3c5	Sfrp2	Phf11d	Bahd1	Bend3	Fuca1
Cenpl	Gm6489	Ralb	Usp2	Pom121	Lypd6	Ly75	Baz1a	Bmyc	Fdxr
4930503e14rik	Tmem182	Etnk2	Usp3	Hipk1	Galnt16	Saysd1	Bcl6	Dnmt1	Inhbb
Gm13242	Gm17767	Chil1	Fam13c	Egln2	Zic2	Akap2	Bend3	Dnmt3a	Clca2
Adrbk2	Mfsd6	Cyb5r1	Mlycd	Acap3	Gpat2	Mapt	Bmyc	Dnmt3b	Baiap2
Cd97	9130227L01Rik	Lamc1	Ncor2	Recql4	Limd2	Gfod1	Cbx3	Dyrk1a	Tcn2
Frs2	Gm28802	Tomm40l	Nkiras1	Zbtb24	Epha8	Chmp4c	Cbx8	Eed	St14
Idua	Gm29016	Gm7804	Fam234b	Tgfbr2	Nt5dc2	Zyg11a	Cdk2	Ehmt1	Rb1
Serpina1b	Pard3bos2	Slamf9	Lrriq1	Rab40c	Casp6	Hk2	Cenpv	Ezh1	Rxra
Lonrf3	Klf7	Pycr2	4930519G04Rik	Zfp628	Sbk1	Ooep	Dicer1	Ezh2	Procr
Cenpp	Gm28923	Iars2	Ptprz1	Mmp17	Camsap3	Slc44a1	Dmrtc2	Hdac1	Abhd4
Them4	Map2	Sfmbt2	Pold3	Mmp19	Mapk12	Slc6a6	Dnmt1	Hells	Jag2
9530077c05rik	Stk36	Msrb2	Hdac8	Pcdh7	Actn2	Lrrc2	Dnmt3a	Jarid2	Hdac3
Acer2	Irs1	Rabl6	Gmpr	Usp20	Nefl	Rbm47	Dnmt3b	Kcnq1ot1	Ak1
Mpc1	Daw1	Egfl7	Phc2	Tubb4b	Pfkm	Hcfc2	Dyrk1a	Kdm1a	Hexim1
Vps13b	2810459M11Rik	Col5a1	Extl1	Mafg	Aff3	Arhgap23	Eed	Kdm5a	Mknk2
Majin	Iqca	Zdhhc12	Extl3	B3galt4	Pdlim3	Esrrb	Ehmt1	Kmt2b	Ctsd
Gabarapl2	Col6a3	Fnbp1	Tmem164	Trim41	Xkr5	Rmnd5b	Ezh1	L3mbtl3	Zmat3
Igll1	Gpr35	Ak1	Tbc1d8	Leng1	Clic6	Tnfsf9	Ezh2	Mbd2	Sfn
Stat2	Serpinb3a	A930012O16Rik	Tbc1d1	Hinfp	Flywch1	Tgm1	Fam172a	Mbd3	Iscu
Kcnk5	Zfp813-ps	Platr26	Tbc1d5	Klhl29	Mboat1	Id1	H1f0	Mbd3l1	Vamp8
Plekhm3	Gm28362	Ube2l6	Akirin2	Kat2a	Arhgdig	Tdh	H1f9	Mbd3l2	Rps12
2210408i21rik	B020011L13Rik	Rtn4rl2	Ap3m2	Klf12	Megf6	Gjb3	H3f3a	Morc2a	Fbxw7
Adgre5	Gm29106	Mdk	Limd1	Sbk1	Rdh11	Tbx3	Hat1	Morc2b	Wrap73
Ascl2	Dpp10	Ppp1r14d	Kcnip2	Bgn	Tspan7	Dgka	Hdac1	Mphosph8	Stom
Vmn2r94	Slc26a9	AA467197	Secisbp2	Gli2	Fasn	Klf4	Hdac2	Myc	Plxnb2
Drd3	Tmcc2	Bloc1s6	Cacna1d	Pi15	Rbm46	N4bp3	Hells	Phf2	Abcc5
Olfr331	Prelp	Slc24a5	Cacna1g	Uhrf1bp1	Bend3	Pcsk6	Hmga2	Resf1	Cebpa
Fgf15	Rgs16	Slc12a1	Xrn1	Nrbf2	Tox3	Cdyl2	Hmgb1	Rrp8	Sdc1
Obox3	A830008E24Rik	Oxt	Cnot7	Sesn2	Ctnnd2	Fam81a	Hotair	Samd1	Ephx1
Grk3	Ier5	Tmx4	Cnot4	BB287469	Cyp7b1	Hs3st3b1	Hp1bp3	Setdb1	Ccnk
Gm5128	Myocos	Acss1	Nfic	Boc	Pcdh1	Esyt3	Kcnq1ot1	Setdb2	Blcap
Pramel3	Selp	Ahcy	Nfia	2900011O08Rik	Fads2	Cltb	Kdm1a	Sirt1	Tspyl2
Zfp229	Tbx19	Platr27	Cxcr3	Cabin1	Scd1	Dhrs1	Kdm5a	Smarca4	Pvt1
Hdc	Gm7694	Gtsf1l	Nfix	Kifc1	Ypel1	Mybl2	Kmt2b	Smarca5	Xpc
Sephs2	9130409I23Rik	Hnf4a	A930031H19Rik	Hcfc1	Parp8	B3gnt2	Kmt2d	Suv39h1	Pidd1
Rcan1	Dnah14	Spint5	Fam219aos	Rusc2	Lin28a	Emp1	L3mbtl1	Suz12	Def6
Tbc1d12	Gm38093	Mocs3	Grhl1	Dmrt3	Phf21b	Rapgef3	Lmna	Tasor	Prmt2
Rpl31	Lyplal1	Pmepa1	Asgr1	Tmem201	Plxdc2	Mras	Lmnb1	Tet1	Ier3
Acbd5	Esrrg	Gm14393	Asgr2	Mapk14	Sema3c	Tfeb	Lmnb2	Tex15	Fos
Zbtb20	Kcnh1	Gm14439	Barhl1	Gpc4	Phactr2	Ntn1	Mbd3	Trim28	Sp1
Slc4a11	Plxna2	Ogfr	Taz	Tenm1	Gramd3	Inhbb	Mbd3l1		Sphk1
Qpctl	Acbd7	Fundc2	Platr30	Ssh2	Fam107b	Slc15a1	Mbd3l2		Rpl36
Atf7ip2	Mrc1	Magt1	Lrrc17	Ctdnep1	Hs6st2	Notum	Mecom		Cgrrf1
Gpat3	Gm13269	Capn6	Zcchc10	Ubc	Arl4c	Ddah1	Mecp2		Zbtb16
Tmem198b	Gm17171	Impa1	Krt25	Rab43	Map3k15	Kit	Morc2a		Prkab1
Gm12824	Hnmt	Zfand1	Dnaja4	Haghl	Tmcc3	Cmtm7	Morc2b		Bax
Tmem146	St6galnac6	Sox2	Agbl3	Lzts3	Efemp1	Galnt4	Mphosph8		Lif
Acox1	Angptl2	Mgarp	Stard7	Tsc22d4	Ube2e2	Hbegf	Mthfr		Apaf1
Agpat9	Ttll11	Kirrel	Dock6	Dnd1	Itprip	E2f2	Myc		Ccng1
Ctsk	Lrp1b	Naxe	Slc23a2	Nell2	Ssbp3	Fblim1	Nrde2		Klf4
Grhl2	Gm13465	Slc50a1	Trdmt1	Aff1	Ier5	Laptm5	Pcid2		App
Rbp7	Rapgef4	Npr1	Dusp18	Sec1	H2-K1	Peg10	Phf2		Ercc5
Depdc1a	6430710C18Rik	Them5	Dusp12	Slc2a10	Nfasc	Rel	Phf8		Rpl18
Osbpl8	Hoxd13	Nudt17	Sptbn1	Dpp9	Wipf3	Angptl4	Pole3		Retsat
Adgrl1	Sestd1	Tbx15	Noct	Gm15455	Sertad4	Tfpi	Pphln1		Ankra2
Colgalt2	Fam171b	Gm43120	Dop1b	Taf6l	Gimap9	Sh3gl2	Ppm1d		Tprkb
Fbln1	Lrrc55	Vangl1	Dop1a	Rgs16	Fam101b	Ppp2r5a	Prdm16		Pmm1
Zfp353	Gm13715	Rhoc	Hsf2bp	Slc27a4	Greb1	Tfcp2l1	Rb1		Traf4
Zkscan1	Or8i2	Gstm7	Rab22a	Fga	Psors1c2	Bmp4	Resf1		Ccp110
Inpp4b	Or5d37	Cryz	Pecr	Zfp296	H2-Bl	Ckap4	Rif1		Ptpn14
Tdpoz3	Fjx1	Aco1	Golga2	E130309D02Rik	Tmem63a	Stk30	Rrp8		Mapkapk3
Eng	Or4k50-ps1	Aldh1b1	Golga5	Gbp8	Pxdn	Ablim1	Samd1		Phlda3
Sync	Slc28a2b	Trim14	Tbk1	Phex	Ldlr	Ak4	Setd7		Csrnp2
Atf2	Sema6d	Plin2	Abcc6	Fstl1	Maml3	Slc25a12	Setdb1		Hmox1
Tcfcp2	Fgf7	L1td1	Abcc3	Rhbdl1	Cdk5r1	Tnip2	Setdb2		Mdm2
Stag2	Zc3h6	Atg4c	Nt5dc3	Mir425	March8	Snx18	Sin3a		Rack1
Gcnt1	Prnp	Cpt2	Gtf2a2	Fam102a	Ajuba	Slc38a4	Sirt1		Vdr
Gm10069	Pak5	Txndc12	4930412C18Rik	Gm4349	St6gal2	Ppp1r14d	Sirt6		Ei24
Zscan4c	Macrod2	Dlgap3	Gm16845	Tob2	D8Ertd82e	Vangl1	Smarca4		Osgin1
Fbxo33	Insm1	Gjb5	Masp1	Prr12	Serpinb9b	Fzd5	Smarca5		Irak1
A230107c01rik	Snph	Gm12947	Daam1	Wdr62	Ccdc24	Camk1d	Smchd1		Cdh13
Commd6	Gm14164	Smpdl3b	Efr3a	6230400D17Rik	Med14	Dixdc1	Snai1		Rchy1
Apol7b	Gm14252	Rps6ka1	Efr3b	Zfp217	E2f6	Cobl	Suv39h1		Wwp1
Ikbkg	9430021M05Rik	Gm13010	Mrpl9	C1qtnf4	Pld4	Prss35	Tasor		Pom121
Chic1	Gm11476	Masp2	Gm2762	Nfs1	Efr3b	Cd38	Tet1		Nupr1
Zfp871	Bcas1	1700096K18Rik	Gm15767	Osbpl11	Rcbtb2	Dnajc6	Tex15		Elp1
Wipf2	Slco4a1	Cgref1	Wwox	Pheta1	Gpc6	Klf8	Tpr		Tgfb1
1700018f24rik	Bhlhe23	Babam2	Pdzk1	Irgq	Cachd1	Sept1	Trim28		Ifi30
Ttll6	Bmp15	C330024D21Rik	Tmem181c-ps	R3hdm2	Arnt2	Chga	Trip12		Pdgfa
Krtap4-13	Dgkk	Gm42735	Crym	Ppp1r16a	Wnk2	Gfpt2	Ubr2		Cyfip2
Pten	Gm14635	Commd8	Aasdh	Tpo	Slit3	Tdgf1	Ubr5		Notch1
Pemt	Maob	Mlec	Kdm6a	Gm7104	Zfp521	Pgm1	Uhrf1		Hint1
Spz1	Chst7	Oas1g	Kdm6b	Man2a2	Slc43a3	Fam63a	Wdhd1		Btg2
Ptpn2	Klhl13	Oas1a	Dnah7c	Samd4b	Pdzrn3	Ech1	Znfx1		Nudt15
Zfp677	Tesl2	Sumf2	Pcgf1	Prdm2	Efnb2	Dstyk			Bak1
1700123i01rik	E330010L02Rik	Gusb	Ccndbp1	Slc25a25	Insig1	Ptges			Ier5
Tdpoz1	Gm7437	Tes	Bend6	Slc25a28	Gatm	Tmem38b			Dnttip2
Rpl39l	Gm2309	Retsat	Bend5	Fam53a	Slc22a23	Plek2			Sat1
Marveld1	Btg1b	Rtkn	Plekho1	Prr23a1	Ms4a4d	Nudt4			Jun
Ppp1r16b	Prr32	Tia1	Fcho1	Apold1	Lrrn4	Neurod1			Triap1
Ecm2	Zic3	Gdf3	Mical2	Sp2	Nck2	Trf			Polh
Stox1	Magea10	Nanog	Gm904	Zdhhc5	Cgrrf1	Cd1d1			Pitpnc1
Obfc2a	Gabra3	Clec2i	Abhd16a	Donson	Gpsm1	Ifitm3			Ccnd2
Atxn7	Prrg1	Apoe	Acox3	Ptk7	Rasd2	Decr2			Hras
Trak2	AU015836	Numbl	Fry	Mospd4	Cacnb3	Elk3			Klk8
2700089e24rik	Gm371	Shkbp1	Tmco3	Gm13128	Mfap3l	Pqlc1			Aen
Bb287469	Ophn1	2200002J24Rik	Zmat1	Med26	Lhfpl4	Irak3			Nol8
Csrnp1	Nlgn3	Gm17768	Zmat4	Exoc8	Serpinf1	Zc3h12a			Ptpre
Fkbp6	Taf9b	Irf3	Ankrd44	Pi4k2a	Sema5a	Manba			Ada
Gba	Scml2	Myod1	Rnf165	Pramef17	Pde4b	Ceacam1			Trib3
Smim10l1	Hey1	Tmem126b	Rnf169	Dpt	Psme2	Arntl			Rrp8
Tbrg3	C230057A21Rik	Nars2	Mtmr7	Gpank1	Pitx2	Nup62cl			Ccnd3
Mob1b	Gm10745	B3gnt6	Abcb11	Btn2a2	Plcl2	Mcam			Pcna
Zfp810	Ralyl	Mogat2	Abcb1b	Sipa1l3	Chst15	AU015836			Tgfa
Gal3st2	Dnajc5b	Gm3200	4732416N19Rik	Vmn1r227	Hmgb3	Snap29			Perp
Ap5z1	Cpb1	Tead1	Gm5779	Ficd	N6amt2	Atp11a			Plk2
Tex15	Naaladl2	B230311B06Rik	Dnal4	Klrg2	Lpl	Ptprv			Plk3
Glb1l	Nlgn1	Aqp8	Tmtc4	Robo1	Psmb9	Atp9a			Fgf13
Cab39	Gm38153	Apobr	Tmtc2	Ncoa1	Wt1	Tmem102			Epha2
Ptpn4	Samd7	Maz	Arfip1	Armc7	Rimkla	Helz2			Atf3
Nepro	Gm15496	Zfp688	Snap29	Tmem132c	Gbp2	4930452B06Rik			Rgs16
Tex12	Kcnmb3	Kndc1	Ndc80	Smarcd2	Pla2g10	Plcb3			Hbegf
Ticrr	Cetn4	Fuom	Cgas	Smarcd1	Fzd8	Pik3c2b			Adgrb1
Igfbp2	5930409G06Rik	Ric8a	Dhx32	Fgf7	Mfhas1	Sigirr			Atm
Nabp1	2610316D01Rik	Calhm5	Acap2	Camkk2	Mid1ip1	Sec14l1			Atr
Slc25a42	Trpc4	Marcks	Tnrc6c	Fzd2	Slfn9	Atp2a3			Bbc3
Zfp599	Aadac	E130307A14Rik	Psg17	Snord104	Gstt2	Pcolce			Bid
Pisd-ps1	P2ry1	Mical1	Crtam	Uts2r	Mapk8ip2	Itgb7			Casp3
Lphn1	Gpr149	Sgpl1	Dclre1a	Fthl17d	Pcsk9	Hck			Casp8
Prr11	Gm29999	1110002J07Rik	Hyls1	Glis2	Fgf13	Krt17			Casp9
Aste1	Dclk2	Ggt1	Kcnmb2	Fscn1	Ccdc36	Ripk3			Ccnb1
Ttc30b	Paqr6	Misp	Oxct1	Cd80	Cdh10	Casz1			Ccnb2
4732471d19rik	Creb3l4	Nuak1	Aadac	Pramef8	Trim67	Khdc3			Ccnb3
Slc26a9	Gm9113	Dram1	Nol10	Fam104a	Htr3a	Parvb			Ccnd1
Zfp809	Spopfm1	Hal	Psd3	Brf2	Dnajb3	Pou2f3			Ccne1
Arih2	Rfx5	Gm47599	Adamts17	Tm4sf1	Igfbp5	Tet2			Ccne2
4932415m13rik	Car14	Cnpy2	Gsdme	Prob1	Mfap2	Tmem8			Ccng2
Lnpk	Gstm5	Col4a1	Tac1	Rnf126	Tead3	Atg2a			Cd82
Psap	Ugt8a	Col4a2	Tmem47	Pkmyt1	A930004D18Rik	Tns1			Cdk1
Zfp71-rs1	Sgms2	Fgfr1	Tmem42	Tchp	Syde1	Atp2b4			Cdk2
Lclat1	Gm29811	Cbr4	Gm17767	Tbc1d13	Chpf2	Myo1g			Cdk4
Gm52	Lrriq3	Lpar2	Cntn2	Cnnm2	Slc5a5	Prdm14			Cdk6
Abhd6	Gm11784	Tmem161a	Fat2	5730408K05Rik	Marcks	Cmtm6			Cdkn1A
Fbxo15	Gm11827	Homer3	Lrit3	Slc30a1	Pbx1	Nab2			Cdkn2A
Smarca5	Cdh17	Adgre5	Sall2	Slc30a2	Pcyt2	Hsd17b14			Chek1
Hnf4aos	Triqk	Mri1	Calhm4	Mgat5b	B4galt2	Rab6b			Chek2
Retsat	Gm11924	Fbxl9	Klrb1c	Il6ra	Cap2	Mov10			Cop1
Rsrp1	Bach2	Fhod1	Crnn	Ccdc137	Mpp3	Smarcd3			Cycs
C330019l16rik	Tmem215	Slc9a5	Kalrn	1110038F14Rik	Slc25a24	Igsf21			Ddb2
4933437f05rik	Pax5	Hsd11b2	Rara	Cav1	Prr19	Grhl3			Gadd45A
B020004j07rik	Mexis	Tat	Fbn2	Slc25a44	Gmip	Bcl3			Gadd45B
Rint1	Gm11232	Fam25c	Pcdh9	Fancf	Slc39a8	Tmem50b			Gadd45G
Gbgt1	C630043F03Rik	Dhrs4	Obox2	Gm1995	Cdk14	Tmem51			Gtse1
Zfp346	Gm11487	Rec8	Obox1	Clec10a	Cdh24	Nid1			Igf1
Prr19	Gm11238	Nfatc4	Ogdhl	Tacc1	Fbn2	Cd37			Igfbp3
Dennd5b	Gm13867	2410022M11Rik	Oprm1	Tubgcp6	Efna5	Akap1			Mdm4
4632434i11rik	Bnc2	Trim52	Tmem184b	Stk10	Gadd45g	Fbxo6			Pmaip1
Setx	Zfp352	Vstm5	1700028K03Rik	Ccdc86	Unc5b	Dennd2c			Ppm1D
Rabgap1	Dock7	Zfp26	9330159F19Rik	Lars2	Spred3	Tesc			Pten
Slc5a4b	Pramel18	Yipf2	Tspyl5	Socs1	Pgbd5	Sik1			Rprm
Lrrn1	Pramel19	Slc37a2	Ccdc170	Zfp574	St6gal1	Gas7			Rrm2
Fbxo8	Dab1	Thy1	Ccdc172	Mknk2	Samd4	Fam102a			Rrm2B
Zfp560	Cyp4a14	Sdhd	Usp28	Qtrt1	Prickle1	Gpr4			Serpinb5
Wdr45	B4galt2	Tspan3	1700012H19Rik	Zfand2a	Crmp1	Cnp			Serpine1
4933411g11rik	Rimkla	Neil1	Zc2hc1a	Mamld1	Hsd17b7	H2-M5			Sesn2
Abcb5	Tent5b	Ppcdc	Camk2g	Ranbp10	Capn3	Kcnd1			Sesn3
H2-bl	Runx3	Gm6166	Xkr5	Stk40	Tmem229a	Bcl6			Shisa5
Plk3	Oog4	Stoml1	Fbxw5	Zfp707	Fzd6	Synj2			Siah1
Arl4d	Pramel20	4930461G14Rik	Pard6g	Brsk1	Igdcc4	Cd9			Steap3
Sp4	Pramel21	Itga11	Pard6b	Ormdl3	Gypc	Klf5			Thbs1
Tacr3	Pramel24	Cd109	Dnaic1	D230025D16Rik	Aif1l	Xaf1			Tnfrsf10B
Tdpoz4	Pramel16	Plod2	Trpv3	Lime1	Pea15a	Atg14			Tp53
Gnpnat1	Trp73	4930579K19Rik	Zfp473	BC030867	Mrc2	AU018091			Tp53Aip1
Mettl27	Speer4b	Hemk1	1700012D14Rik	4930413G21Rik	Pim2	Cpt1a			Tp53I3
Pi4kb	Htr5a	Mst1	Ss18	Sgms1	Lrp3	Tead4			Tp73
Zfp40	Gm42848	Wdr6	Susd4	Ccnq	Dusp4	Sox2			Tsc2
Bc027231	Afap1	Prss42	Paox	Mbd6	Lss	Dlc1			Bmp2
Rif1	Sorcs2	Acaa1a	Nfya	Ccdc85b	Ust	Tfrc			Ndrg1
Fbxw9	Stk32b	Tcn2	Thra	Nkiras2	Zhx2	Dhtkd1			Socs1
Ovol1	Msx1	Ccm2	Eri2	Cptp	Ctgf	Krt42			Itgb4
Hmgn2	Gm20052	None	Slc35c2	Gtf3c4	Tbc1d9	Fry			Mxd1
Znrf3	Ldb2	C1qtnf2	Camkmt	S100a4	Bin1	Retsat			Steap3
Tbc1d23	Gm43769	Adam19	Rftn1	Zbtb32	Lrrk2	Pramef12
Epc2	Gm26725	Rnf130	Cage1	Pdrg1	Fdps	Hibadh
Bcor	Npffr2	Pdlim4	Rgs7	Dmwd	Mfsd2a	Gli2
Grk5	Gm6205	Sparc	Rgs3	Defb13	Tdrkh	Ildr1
Tlk2	Pramel47	Myh13	Rgs9	Dgcr8	Cpeb1	Alpk3
Rfpl4b	Cxcl13	Slc13a5	Pde6h	Pigm	Sqle	Elmod3
Masp2	Cnot6l	Lyrm9	Lgals3	Fam83d	Fam19a5	Osbpl10
Calcoco2	Antxr2	Gm11427	Rbm18	Dgke	Slc16a10
Slc39a4	Hsd17b13	Epop	Hmg20a	Srcap	Fndc3c1
C2cd2l	Tgfbr3	Tmem106a	Wwc2	Zyg11a	Gja1
Selenos	Btf3-ps11	Cd79b	Plcxd3	2510039O18Rik	Trp73
Hist1h2bc	Rph3a	Icam2	Nr2e1	Ly75	Vat1l
Nxf2	Gm2479	Fdxr	Nr2e3	Dedd2	Fbxw4
Slc6a8	Gm42953	Septin9	Lhx2	Zfp771	Lrrc8c
Xist	Tmem132c	Mcrip1	Lhx9	Cebpd	Eml1
Ei24	Gm42817	Tex19.2	Nfkbia	Zswim1	Pycr2
Nup210l	Septin14	H2ac11	5730403I07Rik	Terf2ip	Bst2
E330014e10rik	Caln1	H3c8	Dennd6a	Col6a1	Mafb
Rb1	Spdye4b	Eci3	Bcl2l1	Tprn	Nefm
Tceb3	Kpna7	Gm3325	Mxd1	Esx1	Col2a1
Olfr815	Plut	Gm48170	Clip2	Crtc2	Cdkn2b
Ddr2	Gm36241	Gm48412	Shtn1	Zbtb49	Cdh2
Ell2	Gm20617	Gm7896	Birc3	Gm2016	Cdkn2a
Zfp600	1700012J15Rik	Zfp459	Lurap1l	Mmrn2	Pkdcc
Gla	AA545190	Gm47428	Gkap1	A930007A09Rik	3110009E18Rik
Gm4971	Gm6578	F2rl1	Pdp1	Ercc4	Lefty1
Sumo1	Gm44129	Gm32376	Leng9	Ier5	Fam131b
Usp26	Vwde	Cdc20b	Pde6d	Fam43a	Lhpp
Npl	Foxp2	5033421B08Rik	Fmo4	Psme4	Cd24a
Ly96	Cftr	Efcab10	Ackr4	4933402E13Rik	Grip1
Lexm	Asb15	Gm48847	Mettl24	Lix1	Epha1
Cspp1	Spam1	Dglucy	Nmnat2	Il17rd	A930024E05Rik
1700023i07rik	Plxna4	Serpina3m	Gm4981	Bud13	Nkd1
Snhg11	Lrguk	Rtl1	Kcnn4	Cox6b2	Aacs
Tdpoz2	Wee2	Coa8	Kcnn2	Dand5	Shc4
Zc3hav1	C530044C16Rik	Slc1a3	Cfap97	Csgalnact1	Fabp5
Wdr44	Gm31579	Gm35248	Hoxd13	Mt4	Tmem246
Acyp1	Tril	Cyrib	Mapk3	Usp36	Gpm6a
Gulo	4921529L05Rik	Ptp4a3	Mapk4	Eif1	Fgf8
Plin2	Tnip3	Gml2	Mapk8	Snhg15	Syt13
2810474o19rik	Il23r	Naprt	Fbln5	Taf5l	Thbs1
Au015228	Igkv13-87	Adck5	G3bp2	Nfe2l1	Igfbp3
Cdc5l	Dnah6	Foxh1	4930578E11Rik	Znrf3	Skida1
Ocm	Gm20362	Slc38a4	Ms4a6d	Cdip1	Ccl27a
Rpgrip1	Gm5577	Gm32885	Ebpl	Tmem120a	Tmem80
Mll3	Gm1965	Rnd1	Th	Eml3	S100a6
Sycp3	Gm6507	Etv5	Map4k2	Ier5l
Tex18	Gm839	Gm46560	Map4k5	Srp54a
Simc1	AY512915	Stfa1	Fam217b	Fndc1
Dbr1	Pdzrn3	Gm49599	C1qtnf12	Zc3h10
Lemd3	Cntn6	Poglut1	Rapgef2	Tmem92
Gm16367	Gm19757	Zbtb11os1	Cnih1	Arid5a
Map3k2	Cntn4	Pros1	Rnf212	4930444G20Rik
Diap2	Gm34933	2310043M15Rik	Bptf	Slc17a9
Zfp707	0610040F04Rik	Ezr	Fbxo7	Irf7
Fbxo47	Kcna6	Zfp13	Slc47a2	Pip5k1a
Serping1	Gm53052	Gm50022	Mfhas1	Xirp1
Tex101	Gm53051	Nme4	Arhgef15	Arl16
Ai606181	Gm6600	Gm10505	Arhgef17	Ccdc96
Neto2	Gm44133	Cyp4f16	Arhgef18	Nsun5
Olfr153	Ptpro	Zfp799	D5Ertd579e	Tada2b
Ptger4	Slc15a5	Gm50050	Ift122	Dnajb12
Gm10439	Gm6288	Mymx	Stau2	Slc9a9
Gm1527	Gm15762	Gpr108	Mab21l3	Ddx54
Dbt	Gm3854	Kcnk12	Fam8a1	Pex19
Mlh3	Zscan4a	Crem	Ltc4s	Foxm1
Phf11	Zscan4c	Gnpda1	Psd	Pcdhga3
Lipo3	Zscan4d	Cidea	Hspa12a	Rreb1
Mbnl2	Zscan4f	Acaa2	Gm31579	Tbc1d10b
Cpeb2	Zscan4-ps3	Rbfaos	5830418P13Rik	Ccnjl
Tcta	Obox3-ps1	Cpt1a	C8a	Izumo4
Zfp386	Obox3-ps3	Foxb2	Sec22c	Tmprss9
Xpr1	Obox3-ps4	Sgms1os1	Sec22b	Ids
Syt17	Obox3	As3mt	Sec22a	4930519H02Rik
Oxct2a	Obox3-ps6		C87977	Fthl17-ps1
Lass4	Dact3		Llgl1	Pcsk1n
Trip11	Mill1		Nup54	Ntmt1
Zfand2a	Psg20		Ifi208	Gsdmc3
1700067p10rik	Igsf23		Strn4	Frk
Dpm1	Gm4526		Olfr976	H2-Q4
Gm13119	Vmn1r139		Cog3	Plppr2
Bcas3	Nlrp4e		4933431E20Rik	Odf3b
Mobkl1a	Gm44796		Klf11	Pram1
Rnpc3	Nlrp9a		Zfp536	Cacna2d2
Tnfrsf19	Gm29129		Apex2	6430550D23Rik
Folr2	Lhb		Bms1	Pdxp
2410076i21rik	Gm21037		Slf2	Mmp11
Pramel6	Gm16478		Slc23a4	Gm14164
Zfp101	Gabra5		Abhd12	Kif1a
Erc1	Vmn2r-ps61		Mrtfb	Rbm15
Hormad1	Gm32983		Efhc2	Tcp11l1
Zfp689	Mesp2		Mest	Wnk4
Usp17l5	Gm44996		Gm1965	Plcxd1
Mysm1	Sytl2		Gabrg2	Gxylt1
Zfp407	Dlg2		Fam107b	Asprv1
Hist1h2bg	Usp17ld		2700054A10Rik	Fmo5
Gm2022	Usp17lc		Ctsm	Ggnbp2os
Aqp3	Gm45272		Pdhx	Ptpn9
Myo9a	Gm45040		Nipbl	Gm5577
Apoc1	Lmo1		Svop	Klc1
Zfp352	Ampd3		Uchl1	Agbl5
Zfp263	Irag1		Yipf6	Gpx7
Crem	A730082K24Rik		Trim66	Dleu2
Clhc1	Mfsd13b		Nat8f3	Ccr7
Mme	4933432K03Rik		Zfp873	Nsd3
Mdn1	4933440M02Rik		Abca8b	Plxdc1
Cd52	Ifitm3		Prickle1	Hmbox1
Tcstv3	Ifitm6		Prickle2	Klhdc7b
Clp1	Plekhg1		Prickle3	Scnn1g
Kbtbd10	Ipcef1		Rictor	Scnn1b
Zfp758	Gm6150		Zfp28	Cnr2
1110012d08rik	Rab32		Zfp27	Prnp
Snrpc	Gm5177		Wdr37	BC037704
0610008f07rik	Eya4		Atp6v0e2	Mapk15
Tsen15	Gm36908		Il12b	Tuba8
Zfp985	Themis		Tiam1	Vmn2r1
Rps9	Clvs2		Tiam2	Gnao1
A630001g21rik	Hs3st5		Zfp3	1110028F11Rik
Acot6	Rfpl4b		Cfh	Rab42
Gm4787	Fyn		Cdc42bpa	Cdkn2c
Zscan29	Nr2e1		Chsy1	Cdkn2d
Pdcl	Ctnna3		Paip2b	Cercam
Mad2l1bp	Lrrtm3		Nsd1	Sertad2
Sp140	Rtkn2		Nsd2	Ankrd50
Sgk3	Gm47078		Plxdc2	Tnxb
Zfp9	Gm33035		Ablim1	Ulk2
3110052m02rik	Gnaz		Ablim2	Papln
C130073f10rik	Gm48158		Rnf38	Pif1
Ccdc189	Ascl4		1700011B04Rik	Fgg
Tmem106a	Ascl1		Ankrd17	4933401D09Rik
Zfp654	Fgd6		Rnf34	Ankrd23
Avpi1	Gm16239		Rnf150	2210011C24Rik
Trpm7	Tph2		Pcm1	Lrrc3b
Zfp820	Ptprr		Golph3	Kctd12b
Rpl10l	Grip1os3		Olfr288	Psg16
Usp17la	Grip1		Pear1	Rnf43
Atp5l	Gm47027		2900057B20Rik	Spdef
Obox6	Tafa2		Atp2c2	4933427D14Rik
Tmx3	Tac2		Me2	Slc34a2
Bola1	Ikzf4		Ccdc73	Fam78a
Fam178a	Cd209g		B3galnt2	Zfp609
Spata7	Nalf1		Shisal1	9330151L19Rik
C1s	Myo16		Tmem130	Hpd
Gm428	Sox1		Tmem134	Gm13830
Pglyrp1	Defb8		Tmem135	Sema6b
Slc5a11	Ap3m2		Ndufaf4	4930525D18Rik
C330006k01rik	Htra4		Atp6v1b2	Jak2
Gpx1	Gm45490		Med13l	Xpa
Sesn1	7420700N18Rik		Synj1	Sec24a
Alg2	Gm38572		A330033J07Rik	Arhgap22
Tdpoz5	Gm45587		Hs6st1	Adamts1
Wdr47	Sorbs2		Gfod1	Ctse
Dub1	Tll1		Gm10436	Ctss
Cdkn3	Psd3		Ankrd13d	Micall1
C130026i21rik	Lzts1		Ankrd13a	Rab39
Rnf160	Calr3		Bpifc	Crebl2
Af067063	Rasd2		Prkaca	Gm10653
Ddit4l	1700067K01Rik		Nrg3	Zdhhc1
Tsx	Gm10637		Nrg4	Stpg3
Ccr4	Zfp423		Galnt12	Shb
Spdye4b	Tox3		Magi1	Gm10865
4933406j08rik	Mmp2		Slco1a5	Gm11423
5730590g19rik	9330175E14Rik		Klhl28	Inka1
Srr	Cdh8		Otx1	Paupar
C1d	Gm45277		Lrrc41	Sez6l
Malat1	D030068K23Rik		Lrrc40	Fam89a
Sec1	Gm30052		Arel1	Cpd
Rbmx	Osgin1		Slc44a5	AW011738
Klhl41	Tubb3		Pls1	Nrsn2
Capsl	Pgbd5		Cdk17	Zfand4
Cers4	Nrp1		Nudt15	Sap30l
Bc059842	Fezf2		Zkscan7	Qsox2
Fgf5	Nek10		Zkscan6	Pitpnm1
Zfp51	Gm30108		Zkscan8	Ubtd2
Frg2f1	Zfp503		Cyp2c69	Htra3
Rmnd5a	Gm10248		Eef2k	Stat2
1700034f02rik	Dennd6a		Tnni3	Mex3d
Snai1	Cacna2d3		Taf3	Stk35os1
Apol7e	Gm49030		Cd177	Stradb
Glb1	Gm7995		Tmtc3	Ralgds
Mbd5	Gm49965		Ms4a10	Acvrl1
Av320801	Gm17184		Tert	Pde6g
Gm11487	Gm43305		Phldb1	Pik3ip1
Plbd1	Shisa2		Pygo1	Jakmip3
Atm	Gm26969		Mgat4c	N4bp2l1
1700029p11rik	Fam167a		Ube2q2	Zmynd15
Igf2r	Trim35		Zfp362	Nectin4
Irak2	Nefl		4930556M19Rik	Nptx1
Sppl2a	Gm31227		Arid3c	Fv1
Snx1	Adam7		Arid3b	Gm13648
Ltn1	Gm49164		Urad	Tlcd2
Hmmr	Ccdc122		Adss	Adamts15
Olfr328	Scel		Abi1	C920021L13Rik
Gm5635	Gm26791		Hmgcll1	Prdm15
Ai747699	Gm33906		Lrrtm3	Icam1
Aff1	Gpr83		Lrrtm2	Vwa5b2
Lrrc15	Smco4		Ddi2	Chrne
Cycs	Cnn1		Ripk2	Serpinb5
Diap3	Or8b35		Fam133b	Slc35g2
Gpbp1l1	Or10d5j		Ctnna2	Syna
Zswim2	Gm47877		Dbndd1	Zfp575
4632427e13rik	Gm15507		D030068K23Rik	Rit1
Mrps17	Lrrc49		Tm7sf3	Pla2g4d
Lnp	Rab8b		Nt5c3	Eid2b
Tbx3	Scg3		Nt5c2	Tmem170
Dub1a	Hmgcll1		Txndc2	St3gal1
H2afx	Cgas		Hcfc2	E2f7
Acad9	Mei4		Ccne2	Dixdc1
Wdr81	Gm34397		Tspyl4	Gid4
Phkg2	Ephb1		Baz2b	C230035I16Rik
Zfp617	Tmem108		Samd10	Ccnk
Tctn1	Col6a6		Mmd	Cldn9
2010106g01rik	Fbxw20		Adcy5	Tmed6
Zzef1	Itga9		Adcy8	Tmed9
Ap1s2	Scn10a		Krtcap3	Gm5088
Uap1	Gm47066		Zfp442	Mid2
Sft2d3	Gm47182		Zfp449	Thsd1
Psd4	Ramp3		Rimkla	Plvap
Trabd2b	Vwc2		Abhd2	Degs2
Tfcp2	Egfr		Abhd4	B430010I23Rik
Cebpa	Gm10466		Bdkrb1	Prokr2
Gm13040	Ccdc85a		Clvs1	B230219D22Rik
Luzp4	Gm12122		Clvs2	Zyg11b
Pnp2	Atp10b		Dach1	Nlk
Csrnp3	Ccnjl		Sdc2	Bcl2l13
Fthl17	Irf1		Mapk10	Abca2
Slfn2	Dnah9		Naa30	Creb3l2
Terb2	Ntn1		Pde1c	Zfp36
Rad54l2	9230020A06Rik		Pde1a	Zfp30
Spic	Rph3al		Dnm1l	Ccdc88b
Rdm1	Sebox		Kif23	Slc45a1
Lmbrd1	Gm11426		Nol4l	Dact1
Tmem41b	Gm20234		Znfx1	Sertad4
2410089e03rik	Lhx1		H6pd	Lysmd1
Olfr330	Hsf5		Acbd3	Frem2
Stag3	Car10		Gm13752	Slc1a5
Frat1	Gm11543		Enox1	D17Wsu92e
Mcf2	Dlx3		Tenm2	Sox30
1700019n12rik	Skap1		Smox	B020004C17Rik
Ddias	None		Palb2	P3h1
Gm4858	Fzd2		H2-T22	Gm15545
Tex11	Gm22000		Synpo2l	Eml5
Dusp28	Itgb3		Arhgef11	2810029C07Rik
Slc1a1	Cd300c		D6Ertd474e	9530059O14Rik
Glt25d2	Cd300lf		Dok4	Ppp1r36
P4ha2	Bahcc1		Dok5	Galns
Ttll1	Cd7		Rims1	Rdh12
Duxbl	Tubal3		Rims2	Tmem269
Bc055111	Gm35330		Ddhd1	5031425E22Rik
Wnk3	Adarb2		Slc25a1	Igtp
Slf2	Chrm3		Dcp1b	Cd47
Etv3	Lyst		Dcp1a	Best2
Catsperd	Gli3		Oas1h	Slc4a1
Slc34a2	Pou6f2		Oas1c	Wbscr25
Naalad2	Elmo1		Oas1e	Vat1
Bc061212	Zkscan4		Igf2bp3	Synm
Car6	Prl8a2		Igf2bp2	Ypel1
Cidea	Foxc1		Dcn	Ypel3
Gm9	Gm11381		Onecut1	Zfp821
Wars2	Gm40910		Gnat1	Ap4e1
Tulp2	Gm48704		Celf5	Sacs
Kctd12b	Gm31834		Celf3	Npat
Sord	Gm48510		Kras	Lix1l
Rab30	Gm10790		D630033O11Rik	Ctdspl2
Slc16a6	Gfod1		Bank1	Slc23a1
Pls3	Rnf182		4933432K03Rik	Mtmr6
Qsox2	Gm5083		Stk24	Dpy19l4
Impdh2	Id4		Ppp2r2d	Trmt2b
Rbbp6	Gm30302		Slc7a11	Apol7a
Satb1	Gm8674		Rab4a	Gm2694
Ncoa1	Diras2		Adam32	Csl
Armcx5	Gm2762		Heatr6	Ccdc171
Bc080695	Gm35333		Ippk	Usp29
Slc19a3	Cts3		Tmem181a	Zfp983
Mrps28	AA414992		Klf7	Ahi1
Ostm1	Gm31219		Ccdc181	Atad5
Il6ra	Gm48399		Ms4a15	Cysltr1
A430089i19rik	Pde4d		Tceal8	Ppp3cb
Eu599041	Cspg4b		Parp4	Fabp9
Cnnm2	Gm47913		Mas1	Gm16973
Papolb	Tcstv1		Klhl35	Trim63
Plekhh2	Gm21761		Gtf2ird1	Prr15l
Steap3	B020031M17Rik		Hmgcs1	Tceanc2
Foxa1	Gm20767		Serpine2	Mbd3l2
Emc7	Gm21818		Lzts1	Spata33
Cthrc1	AF067061		Tsc22d1	Lrrc42
Rpl22l1	BC147527		Hirip3	Cop1
Gm8994	Tcstv3		Fbxl8	Cdk19
Tc2n	Gm48762		Fbxl4	Cyp2c67
Zfp983	Gm48584		Sertad3	Ndst4
Pdk4	Tpo		Gm13032	Nkd2
Adam4	Prkar2b		Matn1	Uhrf1bp1l
Oxct1	Hdac9		Matn2	Spag5
Coch	Agr3		Zim2	Rims3
Mov10l1	Tspan13		Gm33301	9930021J03Rik
2310001a20rik	Gm33680		Gm19299	Oaz3
Cpn1	Gm48578		Gorasp2	Ralgapa1
Fam83d	C87198		Pgbd5	Stk26
Gm13154	Mdga2		Emb	Gne
2610008e11rik	Gm47432		Kcnj15	Coq8b
Epm2a	Gm8075		Sema5a	Tgm4
Pde6a	Acot3		Vav3	Rala
Mybl1	Tgfb3		Myrip	Zbed6
Tect1	Gm18983		Rph3al	Adgrv1
Bex6	Eif1ad2		Slc2a12	Poln
Klf8	Eif1ad4		Krt73	Usp44
Dnajb9	Eif1ad14		Ap3s1	Senp7
2210409e12rik	Eif1ad17		Ms4a1	Dagla
Gm5595	Eif1ad16		Fxr1	Myadml2
Au019990	Gm5955		Edn1	Oprk1
Als2	Gm8605		Rbm44	2610028H24Rik
Vdr	Eif1ad10		Rbm46	Prdm5
Sytl5	Eif1ad15		Rbm48	Prrx2
Aa415398	Kcnk13		Dpp6	2700012I20Rik
Eapp	Gpr68		Sipa1l1	Fam135a
A930001n09rik	Ppp4r4		Pacrg	Rbm3os
Slc38a6	Tcl1b2		Epb41l3	Sp4
Usp17ld	Tcl1b1		Mlxipl	Zfp760
Ott	Tcl1b5		Fam71e1	Neurog2
Gm10696	Tcl1b3		Epha5	6430584L05Rik
Eif2ak3	Tcl1b4		Gm19466	Sec63
Guca1a	Gm32635		Wbp1l	Smg1
Glrx2	Ighg3		Opalin	Rad51ap1
Gm4340	Rapgef5		Timeless	Lrrc69
Sp110	Fbxl7		Trim11	Gata1
Pramel7	Gm15941		Slc48a1	Casp3
Tmc8	Gm49271		Ube2i	Gprasp1
Wbscr27	Trps1		Ube2h	Zfand6
Ric3	Gm7489		Treml4	Fzd4
Zfp672	Enpp2		Gab2	Lrrc3
Hexim1	A1bg		Ulk4	Fbxo16
Rtn4rl1	Gsdmc3		Mpzl1	9530077C05Rik
Lat2	Gm49409		Foxp2	Zfc3h1
Usp17lb	Il2rb		Eps15l1	Map7d3
B430203m17rik	Gm3924		Irgm2	Susd1
Gss	Bik		Gspt2	Foxr1
Apoc2	Adm2		Hhat	Rem2
Anpep	Gm36480		Rgs17	Spag6l
Mex3b	Cntn1		Il31ra	Kcnj2
Brp44l	Prph		H13	Synpr
Dub2a	Krt84		Lingo2	N4bp2l2
Eloa	Krt71		B3gntl1	Kcnrg
Gm1564	Gtsf2		Tunar	Dcdc2c
Sdr39u1	Grin2a		Dazl	Fam227b
Usp17lc	Ccdc74a		Foxo3	Fam227a
Was	Iglc3		Foxo6	Nxt2
2900064a13rik	Iglv1		Slc24a2	Fam171b
Kif18b	Iglc2		Tgm7	Slc26a4
Senp7	St6gal1		Strn	Tbc1d23
Mael	Trp63		Ces5a	Gpt2
C1s1	None		Angel2	Sbno1
Meioc	Muc20		Nsg2	Mbd4
Hoxd11	Adcy5		Oas1f	Ccdc39
Tmem167	Fbxo40		Zfp735	Ccdc36
Atxn3	B4galt4		Epb41l2	Tut7
Cyp2t4	Igsf11		Ebf3	Rubcnl
D4wsu53e	Gabrr3		Ebf2	Orai3
L3mbtl2	D16Ertd519e		Lmln	Oat
Kng1	Gm23083		Lgr6	Lrrc74b
Lrrn4	Olig1		Insm1	Irs4
Gm5622	Erg		Epdr1	Katna1
Mblac2	4930579D07Rik		Pms1	Swt1
Ccdc116	None		Amigo1	Ccdc88a
Pramel5	Pde10a		Pgm5	Ggps1
Sesn2	Gm10512		1700028I16Rik	Zfp385c
Speer4d	Gm16050		Cps1	Ccdc66
Ctsc	Tcte2		Tmem108	Agtr1b
Olfr1136	Vmn2r94		Tmem107	Prph2
Fancm	Vmn1r227		Pdzrn4	Fam43b
Zfp54	Vmn1r234		Cyp2b19	Lpar6
D5ertd577e	Gm18270		Snap47	Rilpl2
Gtf3c6	Cacna1h		Herc3	Ints6l
Sirt7	H2-M10.4		Lpcat2	Nfat5
Hoxc13	Pgk2		Asb15	Baat
Speer4e	Cyp39a1		Tbc1d32	Adam17
Polr2a	Gm17830		Dhx57	Usp32
Tsen2	Dazl		Fstl4	Rsf1
Arsk	Plcl2		Blcap	Pnisr
Pramel1	Adgre4		6030458C11Rik	Snhg10
D230025d16rik	Pdzph1		Meis2	Nfe2l3
H47	AU016765		Med15	Eda
Prnp	Gm49870		Ece1	1700086L19Rik
Tfpi	Gm49871		Lrrc31	Mga
Ndufa11	Emilin2		Sla2	Micu1
Akap11	Xdh		Cacfd1	Gm11634
Gm12794	Gm50056		Rhpn2	Cd24a
Sycp1	Gm35031		Gipc2	Zfp791
Kmt2c	Gm50097		Nlrp6	Nbeal1
Phf20l1	Cdh2		Nlrp2	Jazf1
Mfsd7c	Dtna		Dnajc9	Rprd1a
Klf9	Fhod3		Pxdn	Speer4d
Bc013712	Rit2		Mocos	Speer4e
Uncx	Reep2		Srp72	Speer4a
Speer8-ps1	Egr1		Ffar2	Arhgef26
Chit1	Prob1		Zdhhc14	Sorcs1
Crebrf	Pcdhb17		Il19	Tcof1
Timm8a2	Gm5820		Auh	Tinf2
Fxyd5	Sh3rf2		Hif1a	H2afv
Mpp7	Cdo1		Ebag9	Gm21083
2010107h07rik	Zfp608		Tulp3	Prss46
Dppa2	Marchf3		4930546K05Rik	Gcnt2
Gm166	Myoz3		Wdr60	Calhm6
Gm16522	Adrb2		Aldh9a1	1600015I10Rik
Gm6803	Oacyl		Fam122b	Tnfrsf13b
Gm20767	Gm19784		4931408C20Rik	Wnt4
Gm2056	Mro		Vwc2	Rrh
Gm4340	Gm47272		Ctnnd1	Id4
Gm2046	Gm52988		Als2cl	Sorcs3
Gm21818	Gm8189		Nlrp4a	Trub2
Gm2035	A430093F15Rik		Nlrp4f	Gcm1
Gm13335	Ms4a1		Fcna	Ccnyl1
D13ertd608e	Vps13a		Gpatch2l	Fiz1
Bc147527	Gda		Nrbp2	Zcchc13
Tcstv3	Gm21542		Kdm4a	Soga1
Gm5039	Gm48775		Usp46	Gsdmc4
Gm13101	Gm815		4732490B19Rik	Gm136
Drr1	Glis3		Kcnk1	Fem1c
Gm21761	Pax2		Zfp963	Plekho2
Gm2075	Lbx1		Galr1	Btbd17
Dcc	Fbxw4		Tubb2a	Acoxl
Gm27167	Tdrd1		Nek7	H2-Q5
Gm14742	Gm37381		Senp1	H2-Q1
Zscan4c	Adhfe1		Ext1	Mtmr2
Gm43049	Tfap2b		Upk3bl	Fbxl12os
Gm16243	Pkhd1		Comtd1	Dpep1
Gm13191	Il17f		Mapre1	Dpep2
Zscan4d	Col19a1		Trak1	Cryba1
Gm13078	Gm5698		Mapre2	Tnfsf15
B020031m17rik	Bend6		Tcf7	Setd1a
Zscan4f	Tsga10		Tet3	Dclre1b
Usp17lc	Lonrf2		C1qtnf1	Apol7b
Gm12800	Il1r1		C1qtnf6	Ccsap
Af067061	Slc9a4		Fam189a1	1700066B19Rik
Gm8300	Bivm		Stra6	Cdc20
Sva	Slc40a1		Snph	Morn3
Gm7104	Dnah7b		Ppm1b	Zbtb20
Gm13083	Dnah7c		Ica1l	Gm5095
Rp23-32a8.10	Tmeff2		Lcor	A930015D03Rik
Gm13964	Stat4		Trappc3l	Camk2n2
Gm8953	Ankrd44		Setd6	Snord99
Tcstv1	Plcl1		Bcl6	Vmn1r51
Bc080695	Casp8		Bcl2	Tbcc
H2-m10.4	Stradb		Fam78b	Arl2bp
Spz1	Cdk15		R3hdm4	Espl1
Rp23-32a8.11	Gm11587		Krt80	Zfp622
Gm4027	Cmklr2		Amfr	Mmp1a
Aa792892	Unc80		Stx12	Mmp14
A530040e14rik	Cps1		Dbx2	Mmp24
Au019990	Spag16		BC039771	Atad3aos
Gm13119	Abca12		Cd55	Fbn1
Gm21936	4933417E11Rik		Ppp1r42	Gm20594
Gm10696	Tmem169		Ppargc1a	Ppp2r5b
Gm5662	Gm29183		Nobox	Usp26
B020004j07rik	Vil1		Med28	Fbxw9
Bb287469	Gm17751		Rassf1	Gm21992
Gm12794	Pax3		Ccdc180	Gm19710
Inpp4b	Col4a3		Rassf6	4930407I10Rik
Gm2016	Pid1		Myt1	Gm5127
Gm21319	Ecel1		Dlec1	Gm5129
Tmem92	Gbx2		Mea1	F13b
Lmx1a	Gm29483		Xrra1	Fbll1
Pramef25	Macir		Fam84b	Unc119b
Sp110	Serpinb12		Tox	Rgs4
Usp17la	Zfp813-ps		Klhl32	Rgs6
Platr31	Gm7145		Dlx4os	9330159M07Rik
Zscan4b	Cfap221		Gldn	Mad2l1bp
Colgalt2	Nckap5		Thsd7b	Man2c1os
Gm7682	Thsd7b		Thsd7a	Tnip3
Gm28940	Cd55b		Kcnh5	Msantd1
Gm21847	Il20		Kcnh3	Ddx28
Gm8994	Mfsd4a		Sgcd	Cd2bp2
Ac125149.3	Gm19461		Sgcb	D1Pas1
Atxn7l1os1	Nek7		Sgcz	Ldhal6b
Ctf2	Crb1		Pmp22	Rab19
Gm13040	Gm34816		Cabp1	Gm32014
Rp23-10i8.1	Rgs2		Jph3	Hymai
Gm33466	Rgl1		Coq10b	9930111H07Rik
Phf11a	Rabgap1l		Ccdc158	Ccdc71l
Ankrd22	Fmo4		Secisbp2l	Hcrtr2
1700030l20rik	Slamf1		Mansc4	Chst12
Slc10a6	Dusp23		Mansc1	Fabp6
Prr18	Fmn2		Gm17066	Vgll2
4933440m02rik	Gm36307		Atp11a	B020018J22Rik
Gm43391	Opn3		Tbc1d22b	P2rx1
Prex2	Cnst		E330016L19Rik	Gm6568
Dcdc2c	Cdc42bpa		Prdm6	Carns1
Fgf1	Psen2		Ppil6	Gm4872
Duxf3	Gm33973		Cndp1	Fam107a
Cml2	Ush2a		Prkd2	Reg3b
Iqcf1	Gm30725		Olfm1	1700013H16Rik
Gm7102	Atf3		Zc3h12c	Ift20
Gm4981	Hhat		Erg	Isg15
Dner	Olah		Gm11545	Gm8267
Adcy2	Gm13180		Zfp955b	Efnb2
Ccser1	Camk1d		Zfp955a	Hoxa13
Slc27a2	Celf2		Stard3nl	Uncx
Aqp9	Gm13211		Cetn4	Gm10638
Csrnp3	1700061F12Rik		Naa80	Khdrbs1
Ai838599	Il2ra		Snx9	Snora64
Cfap52	Itga8		Osmr	Ccdc78
Tie1	Pter		Rapgefl1	Cactin
Clec10a	Cacnb2		Arhgap20	9930012K11Rik
	Nebl		Arhgap26	Hs6st2
	Gm13346		Arhgap24	Alox15
	Gpr158		Lrrc75a	Csf1r
	Tbpl2		Olfr461	Ankrd13c
	F730016J06Rik		Copb1	Dido1
	Stxbp1		Tubd1	Galnt18
	Stom		Pkd2l2	Lrrc43
	Lhx6		Nfkb2	Vgf
	Gm43970		Cpsf4l	Ror2
	Kynu		Nr2c1	A530032D15Rik
	Arhgap15		Htr5a	Gm4311
	Lypd6b		Fam53b	Slc14a2
	Lypd6		Dvl2	Alkbh4
	1700057H21Rik		Mylk	Med1
	Tnfaip6		Parn	Pnlip
	Tank		6430710C18Rik	Gm10190
	Slc4a10		Adamts5	Timm29
	Cobll1		Adamts3	Mmp25
	Stk39		Gabra2	Metrnl
	Sp9		Trim68	Kifc2
	Chn1		Trim60	Thap1
	Ccdc141		Trim61	Tomm34
	Zfp385b		Cts3	B230354K17Rik
	Ptprj		Cts6	Gpr151
	Accsl		Rhobtb1	Slc7a5
	Prr5l		Hspa13	Tmem203
	Ldlrad3		Tpk1	Zfp445
	Ehf		Rasgef1c	Prpsap1
	Qser1		Fbxo28	Rgn
	Slc5a12		Asf1a	Snip1
	Gm13990		Zfp108	Megf10
	Duoxa2		Ahr	Ranbp3l
	Gatm		D830013O20Rik	Spag6
	Astl		Mroh7	Gpc2
	Nphp1		Mroh3	Fam209
	Gfra4		Rab3b	4930553P18Rik
	Plcb4		Rab3a	Ppp1r15a
	Sptlc3		Rab36	Gm4532
	Flrt3		Rab32	H2-T24
	Tox2		Cep68	Sf1
	Pabpc1l		Aldh3a2	Gpc1
	Zfp334		Hoxa1	F12
	Phactr3		Sh3rf1	F10
	Ppp1r3d		Bin3	Fem1a
	Cdh4		Hnmt	Klra3
	Ss18l1		Hamp	Oaz2
	Samd10		Dlgap4	Magel2
	Shroom4		Dsn1	Gm16701
	Prickle3		C530044C16Rik	Aes
	Gm14820		Cd1d2	Dda1
	Efhc2		E130218I03Rik	Usp38
	Zbtb33		Rbfox3	Armcx5
	Tmem255a		Kdelr2	Gm32810
	Zfp449		Arhgef39	Scarna13
	Tm9sf5		Grap2	Scarna10
	Gm14664		Ift140	Gm17019
	Gpr50		Ttc6	1700028J19Rik
	Fate1		Ttc8	Btbd18
	Xlr3c		Ehf	Enkur
	Zfp92		Unc50	Kcnj14
	Plxnb3		Rmi2	Ckap2
	Gab3		Cxcl3	Rbm42
	Cfap47		Disc1	Gpr143
	Tmem47		Nlrp4g	Gm10354
	Arx		Spry4	Gm11756
	Pdk3		Pde10a	Spdye4b
	Gm5401		Fbxl17	Spdye4a
	Asb12		Nup37	Mycs
	Zc4h2		Ndfip2	Jade1
	Pgr15l		Hace1	3000002C10Rik
	Cxcr3		Lonrf1	Brd2
	Dmrtc1b		Speg	Phf11a
	Tent5d		Sptssb	Dyrk3
	Tex16		Taf9b	Gtse1
	Gm7823		Nras	Ermap
	Sytl4		Cept1	Cfap69
	Zcchc18		4930442L01Rik	Cmah
	Tbc1d8b		Ophn1	Tssk2
	Nup62cl		Msl1	Gria2
	Tsc22d3		Brap	Thap11
	Lhfpl1		Wdr19	Cracr2a
	Gm5946		Palld	Strc
	Shroom2		Nod2	1700047M11Rik
	Usp51		Rad18	Rnf4
	Cldn34b2		Hsdl1	Rbpjl
	Sh3kbp1		Hsdl2	Ankrd22
	Ap1s2		C86187	Cstf2t
	Bmx		Abcb6	Cfhr2
	Egfl6		Abcb9	H2-Eb1
	Tlr8		Ift43	Rfx1
	Frmpd4		Trappc2	Tmem100
	Zfhx4		Bglap	Nktr
	Il7		Acpp	Bspry
	Lrrcc1		Wdr11	Prag1
	Gm33819		Cdc25b	Rmdn2
	Cyp7b1		Tdrd12	Rprd2
	Gyg		Foxj2	Fastkd3
	Fndc3b		Ankmy1	Olfr665
	Tnik		Cxcl14	Gjc1
	Egfem1		Fam193a	Bex2
	Kcnmb2		Ntsr1	Bex1
	Gnb4		LOC108168459	Prcc
	Bbs7		Nrsn1	Rhno1
	Hspa4l		Plekhn1	Wdr63
	Sclt1		Aldh8a1	Zfp689
	Pcdh10		Mzt1	Brpf1
	Slc7a11		Snai3	Irf2bp1
	Lhfp		Cmya5	Sac3d1
	Postn		Rad51ap2	Trabd2b
	Nbea		Riok1	Nxpe5
	Sptssb		Brox	Tmeff2
	Tdo2		Tas1r2	Zfp961
	Map9		Atp2a2	Nek2
	Gm43348		Scmh1	Dmrtb1
	Fhip1a		Iqsec2	Arrdc5
	Crabp2		Prelp	Gm14851
	She		Cpvl	4930556G01Rik
	Tdpoz8		Slc6a12	Gm15201
	Gm9121		Slc6a15	BC031361
	Gm9124		Tprg	Gm12789
	Gm5542		Sdcbp2	Dbx1
	Spopfm3		Rspo2	Gm7102
	Txnip		Laptm4b	Mtor
	Cd160		Obox5	AF366264
	Bcl9		Mfap1a	AA414768
	Casq2		Rps6ka3	Nav1
	Cttnbp2nl		Shprh	Trmt61b
	Csf1		Sybu	Setdb2
	Eps8l3		Comp	Npy
	4933431E20Rik		Zfp597	Gm21190
	Gstm1		Zfp592	Fbxl6
	Wdr47		Actr1a	Aif1
	Aknad1		Disp3	1700008J07Rik
	Henmt1		Isl1	Poldip3
	Extl2		Ppard	Olfr1
	Ptbp2		Fam3c	Guca1b
	Bcar3		Bbs12	Slc25a29
	Rrh		Il1r1	Cggbp1
	Mcub		Lrrc61	Olfm3
	Col25a1		Lrrc66	Zc3h12a
	Lef1		Trp73	Gm9
	Papss1		Bco1	Slc35e3
	Bank1		Spam1	Tmem8
	Tspan5		Ect2l	Tex11
	Gm4862		Redrum	Snx4
	Unc5c		Thbs4	Taf11
	Bmpr1b		Tub	Taf10
	Gbp7		Nqo1	Rbsn
	Ttll7		Spin1	Gm6634
	Dnajb4		Bmx	Hspa12b
	Ak5		Arntl2	Adamts2
	St6galnac3		Tspan14	Gabra5
	Slc44a5		D6Ertd527e	Gm1527
	Lhx8		Gnai2	Upk1a
	Fpgt		Siae	Sp8
	Gm42947		Kdelc1	Dxo
	Wls		Zp1	Abt1
	4930423M02Rik		Zp2	Mroh8
	Tox		Spg20	Rab3c
	Car8		Robo2	A630066F11Rik
	Clvs1		Zfp389	Nmb
	Pdp1		Zfp383	Pisd-ps1
	Gm11846		Galc	Fcgr1
	Calb1		Madd	Tm274
	Ripk2		Dzip1l	Raver1
	Gm11884		Klhl5	Cst7
	Gpr63		Emp2	Fbxo33
	C9orf72		Kdm1b	Mcm9
	Lingo2		4930524B15Rik	Mepce
	Rigi		Herpud2	Med29
	Stra6l		Cdc42se2	Lrrn3
	Ccdc180		Ccdc162	Ppp4r3a
	Galnt12		Mks1	Tnpo2
	Musk		Ndel1	Gm16853
	Zkscan16		Usp11	Slc10a3
	Frmd3		2610037D02Rik	Ppp1r2-ps7
	Ptprd		Slc4a1ap	1110006O24Rik
	Sh3gl2		Ice1	Mlkl
	Adamtsl1		Ncoa6	Romo1
	Mllt3		Camk1d	Cd3eap
	Pramel32		Calcoco1	Atp2a1
	Gm49891		Lrrc14b	Gm6902
	Gm12633		Cd36	Snora47
	Gm12670		Ttc28	Pou6f2
	Efcab7		Ttc23	G6pc
	Raver2		Zfp469	Tuba3b
	C8b		Slc6a9	Rbm15b
	Fyb2		Gm3143	Gm19345
	Glis1		Tmem132b	A830082N09Rik
	Rab3b		Ncaph	1700010D01Rik
	4930522H14Rik		Ncapg	AA543186
	Nsun4		Tgfb2	Sp140
	Slc6a9		Tgfb3	AA543401
	Hivep3		Gm11538	Mgat2
	Kcnq4		Khdc1b	Robo4
	Zfp69		Nap1l3	Csnk1g3
	Mfsd2a		Nap1l4	Clp1
	Tfap2e		Gmds	Chil5
	Gja4		Fgf9	Lrrc24
	Spocd1		Rel	BC020402
	Gm12992		Vapb	Fam222a
	Map3k6		Dgkh	Emp1
	Man1c1		Bicc1	Csprs
	Zfp46		Rsph3b	Agfg2
	C1qb		Rbm20	Ccdc166
	Ece1		Cspg4	Pou3f1
	Kif17		A430033K04Rik	Bard1
	Mfap2		Specc1l	Fus
	Gm13041		Suco	Usp16
	Gm13058		Tmlhe	L3mbtl2
	Pramel23		Pgap3	Ep300
	Pramel26		Col6a3	Ncoa3
	Pramel27		Col6a6	Nefm
	Pramel11		Creb3l4	Dnajc5b
	Gm13100		Snx25	Ttc24
	Pramel15		Ppp1r13b	Tgfb1
	Dhrs3		Cipc	Fgf1
	Pik3cd		Mtbp	Ogn
	Ttc34		Igf1r	B4galt3
	Mxra8		Plxnb1	Atf7ip2
	Steap2		A830018L16Rik	Serpina3g
	Abcb4		Tjap1	Stmn2
	Cacna2d1		Poc5	Eif2ak2
	Cd36		Zfp653	Olfr450
	Lrrc17		Zfp652	Snapc2
	Speer4a		Fam81a	Zc3h18
	Dpp6		Srrm4	Tnnc2
	Gm26608		Zcchc3	Fzd8
	Slc30a3		Zcchc2	Fzd9
	Fndc4		Tent5b	9330020H09Rik
	Gckr		Cyth3	Zfp654
	Zfyve28		Clcf1	Trmt12
	Rgs12		Gm10768	Srrm2
	Acox3		Zxdc	Hic2
	2210406O10Rik		Tm2d3	Brat1
	Gm7181		Akr1c20	Abca13
	Gm43303		Lbh	Gm11961
	Adgra3		Hectd2	Zfp91
	Tbc1d19		Gfra4	Fthl17b
	Pcdh7		Gfra1	Fthl17e
	Rhoh		Gfra3	Adam1b
	Zar1		Aldh3b1	Tmem39b
	Slc10a4-ps		Emx2	Smpd3
	Dcun1d4		Nfasc	Nudt4
	Usp46		Hoxd8	Slc22a28
	Kit		Hoxd9	4931440F15Rik
	Thegl		Glis1	4930507D05Rik
	Sult1d1		Tpra1	Gm12596
	Adamts3		Rcan1	Ccl11
	Rassf6		Dyrk4	Taf4b
	Cxcl10		Klhl13	Pin1rt1
	Stbd1		Lancl2	Gm9758
	Ccdc158		Lancl3	Rnf138rt1
	Plac8		Nudt6	1700128F08Rik
	Hpse		Nudt7	Dkk2
	Mapk10		Rcsd1	Strip1
	Lrrc8b		Ttc39a	Foxi3
	Gm15484		4921524J17Rik	D030056L22Rik
	Gm32996		Hook3	Mir144
	Ccdc60		Tmcc1	Ptprq
	Taok3		Tmcc2	Zbtb9
	Ksr2		Tmcc3	Imp3
	Gm43269		Cped1	Pde6a
	Oas1c		Stat3	Nepro
	Oas1b		Ccnt2	Snora78
	Oas1f		Sorbs2os	Tmem129
	Oas1h		Efna5	1700010N08Rik
	Oas1d		Mcub	Ubqln2
	Ccdc62		Tusc3	4930455G09Rik
	Dnah10		Cyp27a1	Tchh
	Gm42945		Repin1	Cd209a
	Gm42952		Magea10	Snord8
	Gm42980		Taok3	Tfpt
	Tmem132d		Skint5	Tbc1d12
	Piwil1		Nlrp14	Notum
	Galnt17		Frmpd4	Pgr15l
	Castor2		Frmpd3	Gm5801
	Rasa4		Cyp2u1	Cwc22
	Zfp68		Vezf1	Ppp1r27
	A430033K04Rik		Zfp541	Gm14403
	Wasf3		Tek	Nanos1
	Flt1		Vps9d1	4931402G19Rik
	Tex26		Cntrob	2010320M18Rik
	Fry		Bmp6	Pth2r
	Stard13		Per2	Ppbp
	Calcr		Runx1t1	Hhipl2
	Dync1i1		Dbn1	Ttc19
	Umad1		Ifi27l2a	Tmem215
	Ica1		C87414	Sstr1
	Thsd7a		Flnc	2010005H15Rik
	Tfec		Hdgfl1	St6galnac4
	Cttnbp2		Gm16104	Pde2a
	Tspan12		Dux	H1fx
	Grm8		4930402H24Rik	Ppp1r14b
	Lrrc4		Clcn5	Mta2
	Cpa1		Adm2	Trf
	Agbl3		Pid1	1700052K11Rik
	Svopl		Cmc4	4932415M13Rik
	Hipk2		Tdrkh	Tacc3
	Parp12		Patl1	Gfi1
	Nobox		Cckar	Polr2d
	Cntnap2		Camk4	Abra
	Gpnmb		Ptprt	Fbxo45
	Gm18765		Ptpre	Arsk
	Hoxa1		Ptprd	Stk11
	Hoxa7		Ptprc	Hyal6
	Fkbp14		Ptprb	Gm6268
	Pde1c		Ptpro	C1ql1
	Qrfprl		Ptprj	Kat6a
	Il12rb2		Akap13	Eya4
	Sh2d6		Tmc4	Pabpc6
	Gm44113		Tmc3	Nptx2
	Tet3		Tram1l1	Grm5
	Alms1-ps2		Pde6b	Atp4b
	Mxd1		Cryl1	Zfp783
	D6Ertd527e		Pbx1	Crispld2
	Hmces		Rnf24	B4galnt4
	4933427D06Rik		Rnf26	Alyref
	Adamts9		Rnf123	4921531C22Rik
	Tafa4		Tm9sf2	Cpsf4
	Mitf		Myocos	Aspn
	Foxp1		Pdlim1	Gm11564
	Gm43950		Pdlim2	Mllt11
	Bhlhe40		Pnrc1	Tbxa2r
	Cpne9		Pcsk5	Dennd2a
	Pparg		Mff	Olfr161
	Efcab12		Cttnbp2	Enpp6
	H1f8		Chrdl1	Srr
	Or6d14		Pacsin1	2410004B18Rik
	Ninj2		Pacsin2	Gm11487
	Vmn2r25		AY512915	Klk1b24
	Tuba3a		Jakmip2	Ranbp17
	Kcna1		Gmip	Ptpn1
	Parp11		Tbc1d15	Als2
	9330102E08Rik		Nlrp9c	Slc7a6os
	Cd69		Itgb2l	Cdk5r1
	Clec12a		Lca5	Zfp706
	Gm27047		Lrrc57	Rps19bp1
	Gm44525		Umodl1	Nxt1
	Gm21940		Hsd17b7	Lgsn
	Gm44134		Gpnmb	Il20rb
	Gm44150		Ergic2	Cdca8
	Gm5581		Ergic1	Scand1
	Styk1		Dsg1c	Plk3
	Mansc1		Crls1	Slc26a1
	Grin2b		Cnst	Slc26a3
	Gm15476		Erbb4	Wtap
	E330021D16Rik		Gm20187	Gmeb1
	Rerg		Man1a	Gtpbp3
	Eps8		Abcg1	Gm6524
	Lmo3		Abcg3	Platr22
	Pde3a		Nsmce2	Gm4832
	Slco1a4		Dock10	Dr1
	Slco1a5		Astn2	Ap5b1
	D6Ertd474e		Prr36	Mocs3
	Casc1		Wdr41	Atp1b4
	Itpr2		Wdr47	Cldn14
	E330012B07Rik		Lnx1	Ifng
	Gm15767		Fam120c	Esp24
	Pthlh		2310022A10Rik	Nup210l
	Lair1		Rubcn	Kti12
	Nat14		Msl3l2	Btla
	Rfpl4		Nanos2	Ankrd54
	Nlrp2		Stox2	Cldn5
	Gm5065		Slc41a3	Dnajc30
	Zim1		Cep170b	Nrros
	Zik1		Stx6	Maz
	Nlrp4b		Hamp2	Csrnp1
	Gm45379		2610035D17Rik	Gtf3c2
	Gm7789		Txnrd3	Gm4432
	Zscan4-ps1		Daglb	2010310C07Rik
	Zscan4-ps2		Siglece	Usf1
	Vmn1r76		Siglecf	Ylpm1
	Gm4224		Slc15a4	Nr2c2ap
	Vmn1r88		Pyurf	Gnb3
	Pla2g4c		Ppil4	Cdc34
	Obox7		Afap1l2	Olfr788
	Obox1		Trim5	Olfr787
	Zfp541		Mn1	Akap8
	Hif3a		Ttc17	Gm14322
	Gm44561		Trpc4ap	Nkapl
	Psg17		Slc25a40	Tatdn3
	Nanos2		Slc25a48	Tatdn2
	Fosb		Sh3rf3	Fam161b
	Ceacam20		Zhx1	Adamts20
	Nlrp9b		Grm4	Apoc2
	Gm6882		Eva1c	Gsk3a
	Zfp111		Acat1	Shisa8
	Zfp108		Rhbdf2	Ints5
	Lypd3		Pot1a	Pcdh10
	Cd177		Oasl1	Pcdh17
	Ceacam2		Gen1	4930599N23Rik
	Nlrp4a		Cplane1	Ptgdr2
	Sertad3		Gnpda2	Tfpi2
	Fcgbp		Bmpr1b	Mkrn2os
	Zfp420		Tfe3	Mia
	Garre1		Vps26a	LOC666331
	Gm12784		Nr1i2	Gm15417
	Gm28078		Fyco1	Cdh23
	AI987944		Syt14	Gm13710
	Siglece		Adamts18	Crlf1
	Klk13		Nceh1	Hexim1
	Slc6a21		Tro	Styxl1
	Gm2788		Atxn2	Hspa2
	Gm45282		Slc6a7	Bicral
	Nav2		Igsf3	Flt4
	Atp10a		Hp1bp3	Aip
	Apba2		Galnt6	Zfp809
	Lrrc28		Prdm16	Rnf225
	Ttc23		Scg3	Emcn
	Mctp2		Vwa5a	Zfp775
	Slco3a1		Zfp661	Zfp777
	Ttll13		Polr2g	Gm13078
	A530021J07Rik		Afp	Phf23
	Rab38		Fbxo40	Pth
	Chrdl2		Svopl	Gm8624
	C2cd3		Per1	Nr1d2
	Or52b6-ps1		Tbx5	9930104L06Rik
	Trim30a		Ccdc14	1700093K21Rik
	Usp17le		Hyal3	Platr17
	Usp17la		Rab5c	Klkb1
	Sbf2		9130015A21Rik	4930478L05Rik
	Adm		Nbr1	Scn3a
	Dkk3		Ube2e2	Rasa1
	Cyp2r1		Eya1	5031426D15Rik
	Iqck		Capn12	Rad21
	Acsm2		Postn	Rtl3
	Zp2		Vsnl1	Tktl1
	Eef2k		Npas3	Ddr2
	Mapk3		Npas2	Trp53tg5
	Rgs10		Vrk3	Gm32693
	Lhpp		Tmem63b	C2cd2l
	Ptpre		Gm29811	Kif18b
	Tcerg1l		Stk3	Kdr
	Lrrc27		Rasl2-9	Ncmap
	Nlrp6		Ptprn2	Scarna6
	Lsp1		Arap3	Msrb1
	Th		Fndc3a	Usp42
	Kcnq1		Syne2	Spata25
	Gm6667		Ccdc84	Aplp1
	Rgs17		Agtpbp1	Slco1b2
	Zc3h12d		Gm13023	Lrrc73
	Ust		Mfsd4a	Rtl1
	Samd5		Ago3	Rtl4
	Grm1		Casp8	Zbtb43
	Plagl1		Lsmem1	Pramel3
	Nhsl1		Rgl1	Pramel1
	Arfgef3		Fndc3b	Kpna6
	Raet1e		Mllt10	Coq4
	Slc2a12		Pafah1b1	B3gnt2
	Hey2		Sox6	Arf2
	Trappc3l		Mus81	Arf6
	Tspyl4		Tmem104	Pdcd2
	Fam229b		Kcnab1	Mlph
	Mfsd4b4		Kcnab2	Zscan4c
	Armc2		Socs6	Zscan4a
	Speer5-ps1		Dhrs3	Zscan4f
	Prdm1		Neil3	Zscan4d
	Grik2		Gna14	Slc29a2
	Man1a		Fnbp1l	Gm3286
	Pkib		Il1rl2	Gm3139
	Gm4981		Gdpd3	Tcerg1
	Gm6494		Mcoln1	Cdk9
	Srgn		Ccl28	Gan
	Ank3		Cyb5r2	Filip1l
	Fam13c		Rbm7	Nphs1
	Pcdh15		Mycbp2	Rnase10
	Derl3		Ldhd	1700013G24Rik
	Prmt2		Uggt2	Cmtm2b
	Pcbp3		Lrrc8d	Prmt6
	Cfap410		Cbln4	Gzmn
	Btbd2		Car11	Slc52a2
	Atcay		Car13	Gm648
	Bpifc		Enpp2	Zfp647
	Igf1os		Fbxw21	1700049E15Rik
	B530045E10Rik		Fbxw20	Pim3
	Mgat4c		Fbxw26	Taar7d
	Slc6a15		Dnah17	Atf4
	Syt1		Dnah10	Atf1
	Lgr5		A230108P19Rik	Gm17026
	Lyz2		Tcl1b2	LOC105246046
	Gm34045		Tcl1b3	Rrs1
	Prr36		Bmp15	Pln
	Gm18393		Midn	Hist1h2bh
	Gm44621		Mgrn1	Sycp1
	Tmem255b		Opn3	Prrt3
	Gm10699		A330093E20Rik	Gm5914
	Dlgap2		Zfp839	Tnfaip6
	Myom2		Pigc	Actc1
	Gm7706		Shld2	Gpr150
	Gm45271		Ofd1	Snhg12
	Fam90a1a		Lrig3	Zfp553
	Zmat4		Lrig2	Ptpn11
	Wrn		Lrig1	Gm4850
	Mfhas1		Gm5535	Pglyrp1
	Slc7a2		Kcnb2	Cbll1
	Zfp353-ps		Atl1	Epha2
	Cyp4v3		Farp2	Sult2b1
	Tlr3		Farp1	Gng11
	Lrp2bp		Mbl2	Mir7024
	Tenm3		Sc5d	Zfp142
	Neil3		Kctd5	Adora2b
	Wdr17		Arpc5l	4921533I20Rik
	Gpm6a		Plekhh1	Igsf21
	Mfap3l		Musk	C7
	Spock3		Noxo1	Gm30223
	Trim75		Hivep3	4930515G01Rik
	Trim60		Zfp709	Plekhj1
	Tktl2		8030455M16Rik	Supt4b
	Lpl		Brsk2	Sft2d3
	Gm43263		Spag16	Zrsr1
	Rln3		Notch1	Spdl1
	Nfix		Notch2	Aanat
	Nkd1		E330017A01Rik	Rpp25
	Nod2		Ifit1bl1	Gm16023
	Rpgrip1l		Gm16630	Fam205c
	Lpcat2		Rnf114	Spata2
	Mt4		Pcmtd2	Ppp1r3e
	Ndrg4		Dscam	Mirg
	Gm15681		1700018B08Rik	Mefv
	Cmtr2		Unc79	Ccl2
	Fa2h		Phf14	Prr22
	Ldhd		Doc2b	Cdan1
	Gm10280		Tmem171	Atxn7l3
	Nudt7		St3gal3	Medag
	Gm31717		St3gal5	Epc2
	Gm38416		Cd101	Gpatch2
	Irf8		Aplf	Gpatch3
	Pabpn1l		Pter	Pah
	Dbndd1		Afap1	Zfp951
	Ngly1		E2f1	Tmem190
	Thrb		Katnbl1	Colq
	Gm47601		Gtpbp1	Sde2
	Kcnma1		Klc2	Ccnf
	Dnah12		Tril	Tedc2
	Erc2		Trio	Lcn9
	Phf7		Gm13103	Atf7ip
	1700024B05Rik		Ktn1	Znhit2
	Ddhd1		Klhl2	Kansl1
	Rpl19-ps3		Ptgs2	Rab26os
	Rnase6		Rimbp2	Bbs1
	Sall2		Smkr-ps	Esm1
	Rem2		Mis12	Zmym1
	Myh6		Bahd1	Ampd1
	3110083C13Rik		Fam71d	Polr3d
	Fgf9		Mapkap1	Slc4a3
	Gm48453		Dusp23	Hormad1
	Atp8a2		Chd2	Cdkn3
	Neil2		Chd9	Serpinc1
	Ebf2		Flcn	E030013I19Rik
	Rubcnl		Mocs2	Ppif
	Cpb2		Lrrc32	Prex2
	Cby2		H1foo	1700017B05Rik
	Enox1		Wdr76	Slc25a33
	Gm1587		Plcg2	Slc25a38
	Epsti1		Unc13b	Srsf5
	Tnfsf11		Unc13c	Prkcq
	Zfp957		Unc13a	Riox1
	Kbtbd7		Cldn12	Haspin
	Pcdh9		Cldn15	9230116L04Rik
	Klhl1		Unk	Ash1l
	Gm41230		Gpr63	Gm15471
	Gm49292		Gpr68	Dnajb13
	Ednrb		Traf1	Dnajb14
	Obi1		Traf3	Cenpl
	Gm6201		Traf5	Ythdf2
	Cfap300		Traf6	Olfr118
	Izumo1r		Kit	Gm33517
	Rab3d		Tspan33	Ddx51
	Bbs9		Ldhb	Akr7a5
	Ntm		Eif2b1	Flrt2
	Sorl1		Ankrd52	Exosc6
	Gm39321		Cirbp	Dpagt1
	Gm31816		4930440I19Rik	Kl
	Usp28		Gm14085	Rprd1b
	Cldn25		Shoc2	Usp1
	Arhgap20os		Phtf1	Cdk13
	4930550C14Rik		Rit2	Dnaja2
	Cyp19a1		Ccdc38	Snord11
	Nrg4		Ccdc30	Soga3
	Snx33		4930470P17Rik	Aicda
	Nr2e3		Tmem243	Ankrd45
	Gm47923		C4a	Pcna
	Coro2b		Hoxc13	Mars2
	Pias1		Pcyox1	Brca2
	Ankdd1a		Usf2	Rps6kb1
	Aph1b		Nup93	Cdc27
	Gm19299		Cyp2f2	Mir1894
	Rora		4930423M02Rik	Bod1l
	Aldh1a2		Gmcl1	Qk
	Pygo1		4930417O22Rik	Ccdc178
	Gm16551		Parp11	Zfp987
	Gnb5		Camk1g	Zfp981
	Gm19531		Kcnma1	Zfp980
	Gm7972		Gnb5	Gabpb1
	Tmod2		Gnb4	Rbm10
	Bmp5		Akap7	Tagap
	5730403I07Rik		Akap9	Pum2
	Lrrc1		Zbtb39	Lca5l
	Col12a1		A330009N23Rik	Ddx20
	Lca5		Scyl2	Ddx24
	Elovl4		Fam161a	Sirt1
	Plscr1		Gm9999	Zfp534
	Dipk2a		Chl1	Gm4871
	Pls1		Gm2042	Fkbpl
	C430002N11Rik		Mitf	Chtop
	Gm33700		Tmem72	Sva
	7420426K07Rik		Tmem74	Zfp1
	Gm9451		Nprl2	Zfp936
	Tlr9		Itsn2	Zfp935
	Dusp7		D14Ertd670e	Gm10433
	Grm2		Troap	Utp23
	Fbxw13		9230112J17Rik	Cdk12
	Fbxw22		Ganc	Taf7
	Fbxw23		4833420G17Rik	Trmt10c
	Fbxw25		Aldh5a1	Ccne1
	Fbxw18		Snrnp27	Adam4
	Fbxw27		Mindy4	Pde12
	Prss44		Mindy3	Kif2a
	Dclk3		Atp2b4	Zfp780b
	AU023762		Tmem185a	Ppp2r2a
	Cmtm8		Rfpl4	Parp9
	Gm17399		Ccdc141	Eloa
	Myrip		Atp10a	Smpd4
	Gm39465		Atp10b	Elovl3
	Ano10		Stard13	Slc27a2
	Tcaim		Usp30	Rnf2
	Slc6a20a		Cit	Ankrd28
	Ccr3		Serpina7	Pms2
	Nlrp4g		Cyp2c53-ps	Sco1
	4921536K21Rik		F630040K05Rik	Prps1l3
	Ccdc201		Gm839	Apon
	Otx1		Nostrin	Cdc45
	Ehbp1		Creb5	Rbbp6
	Bcl11a		Elk4	Diexf
	Lcp2		Serac1	Rasef
	Cyfip2		Nckap5	Arid4a
	Timd4		A330023F24Rik	Gpr50
	Sgcd		Cadps2	Baz1a
	Cby3		Cdh8	Cul4b
	Jade2		Cdh3	Ccdc25
	Tcf7		Cdh6	Setd2
	Ccdc69		Thsd4	Speer4f1
	B9d1		Marveld2	Tpr
	Myh3		Fam110b	Brip1os
	Pld2		Fgd1	Smndc1
	Or1e1c		Phip	Yrdc
	Zfp735		Ninj2	Prdm4
	Zfp616		Nat14	Tmpo
	Ksr1		Lrch1	Dhx8
	E230016K23Rik		Lrch3	Skp2
	Tbx4		9530068E07Rik	Zbtb8a
	Gdpd1		Bglap2	Gm13034
	Stxbp4		Bglap3	EU599041
	Cdc34b		Slc38a9	Hecw1
	Copz2		Htr7	Prpf40a
	Krt12		4930429B21Rik	Zfp105
	Tubg2		Cdh20	Nom1
	Wnt3		Cdh26	Arhgap11a
	Sphk1		Serpinb1c	Pbrm1
	Narf		Bsn	Dhx9
	Zfp750		Dennd1a	Apc
	Gm47407		Lsp1	Zfp40
	Hecw1		Bace2	Smg8
	Gm20043		Has2	Usp9x
	Sugct		E230025N22Rik	Zfp229
	Gpx6		Hexim2	Nxf2
	Nrsn1		Myoc	Zfp599
	Gm48073		Arl6ip1	Topors
	Serpinb1c		Sik3	Ctcf
	Serpinb9		Sik2	Mid1ip1
	Ripk1		Gckr	Nefh
	Fam217a		Fbxw16	Mns1
	Ppp1r3g		Fbxw17	Pcyt1a
	F13a1		Fbxw19	Rbm27
	Gcm2		Pigf	Rbm25
	Sycp2l		Itgb6	Ireb2
	Nedd9		Ctdspl	Gm16222
	Gm47448		Fmn2	Mak16
	2010001K21Rik		AI987944	Trim33
	Kdm1b		Adgrb3	Zfp11
	Gm35733		Zfp111	Snora75
	Gm48648		Nab2	Nop16
	S1pr3		Fam155a	Fam72a
	Auh		Kif26b	Smarca5-ps
	Nfil3		Tprgl	Son
	Gm16249		Btnl1	Speer8-ps1
	Eif4e1b		Elmod2	Dbr1
	Slc25a48		Cfap54	Asxl2
	Gm47918		Rnf227	Rex2
	Cntnap3		Ralbp1	Tex15
	Nlrp4f		Cyp4v3	Ly6g6f
	Tppp		Smad5	Cntnap5b
	Slc9a3		Smad1	Rasal2
	Rhobtb3		Smad2	Aida
	Skic3		Sytl4	Cript
	Mctp1		Gpld1	Iqub
	Ssbp2		Efcab6	Smarca5
	Thbs4		Efcab3	Rrn3
	Cmya5		Pga5	2310068J16Rik
	Arsb		Rwdd2b	Kif5b
	Pde8b		Aldh1a2	Orc6
	Iqgap2		Aldh1a3	Orc1
	Gcnt4		Tmem14a	2810013P06Rik
	1700029F12Rik		Shank2	Esco1
	Arhgef28		Syt1	Cyp2b10
	Gm48050		Syt5	Uspl1
	Gm26559		Cnppd1	Etaa1
	Naip1		AA619741	Zfp830
	Gm28989		Edrf1	Bicd1
	3830408C21Rik		Zswim5	Noc3l
	Gm31452		Wls	Zfp708
	Plk2		Gpr180	Mir17hg
	Il6st		Mthfs	Zfp281
	Il31ra		Sfmbt1	Nufip1
	Ccno		2300002M23Rik	C030006K11Rik
	Gm34586		Edar	Rif1
	Isl1		Gzf1	Zfp62
	Gm20763		Tshr	Zfp979
	Pfn4		Upf3a	Zfp977
	Gm32442		Zfp521	Gtf3c6
	9930038B18Rik		Zfp523	Tmed5
	Rad51ap2		Skp1a	Rrp7a
	Cyria		Ibtk	Ppp1r8
	Gm35725		Klhl42	Ppp4r2
	Gm16497		C87436	Ints6
	Gm48538		Gm20125	Usp34
	Gm36862		Pskh1	Tex43
	Cmpk2		Col6a5	9430038I01Rik
	Silc1		Nacad	Zfp407
	Gm15691		Itprip	Cdh9
	Sntg2		Pramef20	Gm7244
	Sh3yl1		Tnfsf13b	Ddx3x
	Fam110c		Nrap	Haus3
	Gm47948		Spryd3	Zfp770
	Ahr		Gm10874	Exosc10
	9130015A21Rik		Rasa4	Rbm8a
	Gm5434		Nphp4	Setx
	Scin		Abca9	Naif1
	Akap6		Prr5l	Fam208b
	Npas3		Prg4	Olfr330
	Pax9		Sort1	Rpf1
	Ttc6		Wdr25	Zfp882
	Gm17821		Wdr20	Mob1a
	Klhdc1		Kcng2	Fam192a
	Atl1		Kcng4	Faap24
	Daam1		Fam126a	Otud6b
	Six1		Gm4632	Kpna1
	Syt16		Foxk2	Zfp280b
	1700086L19Rik		Mob4	Ino80
	Kcnh5		Il2ra	Tle4
	Esr2		Plpp7	Tex38
	Vsx2		Plpp6	Tex30
	Vrtn		Pitx2	Arglu1
	Angel1		Panx1	Irak3
	Eif1ad8		Panx2	Zdbf2
	Gm21939		Camta2	Ythdc1
	Nrxn3		Ndn	Nr5a2
	Ston2		Snapc1	Etf1
	Gm49732		Aire	N4bp2
	Ighg2b		Airn	Tug1
	Ighg1		Efcab14	Ncbp1
	Ighm		Trip4	Zbed5
	Ighv1-60		Elavl3	Gtf2f1
	Cdca7l		Scn10a	B230217O12Rik
	Sp8		Baiap2l2	Tgs1
	Mroh2b		Rnf146	Gm2004
	Ptger4		Rcn2	Pnp2
	Prlr		Slc45a3	Tfb2m
	Pdzd2		Sgo2b	Spata5
	Myo10		Fnbp4	Casp8ap2
	Ctnnd2		Csmd2	Rdh16
	Sdc2		Csmd3	Ccdc125
	Erich5		Hsd3b7	Usp50
	Fbxo43		Hsd3b1	Tra2b
	Ncald		Iffo1	Sigmar1
	Gm35167		Msrb3	Paf1
	Dpys		Zfp385a	Znhit3
	Rspo2		Zfp385b	Znhit6
	Tmem74		Rnf185	Zfp617
	Sybu		Mtss1l	Polr3h
	A930017M01Rik		Ccdc60	Gm20939
	Csmd3		Ccdc62	Cd247
	Gm30159		4930519F16Rik	Rrp9
	Gsdmc2		Spata22	Ppig
	Gsdmc4		Shc3	Arl15
	Asap1		1700010I14Rik	Slc25a32
	Adcy8		Btbd2	Cdv3
	Dnaaf11		Gyg	Prrc2c
	Parp10		Ubash3b	Srsf10
	Shisa8		Ifit1bl2	4930453N24Rik
	Mpped1		Apba2	4930522P08Rik
	Efcab6		Crtc1	Plaa
	Miox		Psen2	Lin9
	Pdzrn4		Lman1	Jmjd1c
	Gm30564		Gnaq	Zfp51
	Tmem117		Rtl6	Zfp54
	Slc48a1		Trp63	AA413626
	Or8s2		Hspb6	Hipk3
	Mettl7a2		Kpna7	Wdr89
	Slc4a8		Cdk20	Ceacam14
	Scn8a		Pfn2	Jmjd6
	Gm35853		Ttk	E230013L22Rik
	Krt72		Smurf1	B3galt5
	Krt76		Arf5	Pdpr
	Nckap1l		Pdcd7	Chst15
	Gm49448		Ssc5d	Gfer
	Mrtfb		Anapc4	Vwa1
	Myh11		Cadps	Gli1
	Spidr		Myzap	Fam228a
	Zdhhc8		Zfp398	Gm5481
	Fam131a		Gabrq	Me3
	Gm49742		Castor2	Zfp639
	Fetub		Dstyk	Rc3h1
	Masp1		Gm6787	4933416M07Rik
	Mb21d2		Togaram2	Anp32b
	Gm49755		E230016K23Rik	Ppp1r17
	Popdc2		Pabpc1l	Mgat4e
	Gm8609		Tram2	Ace2
	Zbtb20		Wnt7a	AB124611
	Gramd1c		Selenop	Sectm1a
	Sidt1		Emsy	Tmem204
	Slc35a5		D230030E09Rik	Adam7
	Cd200		Ccdc115	Gm9958
	Plcxd2		Ccdc112	Heatr9
	Abi3bp		Ccdc110	Rest
	Ftdc2		Rpap2	Lman1l
	Arl6		Sult5a1	2310010J17Rik
	Epha3		Dpp10	Med13
	4930500H12Rik		C87499	Gipc3
	Robo2		Cltrn	Gm19585
	Cldn8		Hgd	Senp6
	Tiam1		Tex35	4930528A17Rik
	1600002D24Rik		AU022751	Ascl4
	Dscam		Ing3	Lamp5
	Zdhhc14		Gm11665	Zc3h12d
	C87487		Plxnd1	Appbp2
	Smoc2		Ttc38	C3ar1
	Gm10509		Psme3	Hspa1l
	None		Tmem232	Vmn2r94
	Zfp760		Dvl3	D730048I06Rik
	Zfp946		BC037034	Col2a1
	Hs3st6		1110051M20Rik	Nfatc3
	Sox8		Tapt1	Usp9y
	Dusp1		Ppp3r1	Bcor
	Phf1		Cep83os	Casp1
	Grm4		Slc35a5	Ednrb
	Pnpla1		Bivm	Usp12
	Bnip5		Cpb2	Fgf3
	Sfta2		Rdx	Lbp
	Ier3		Ncald	Ttc39d
	Gm8801		Txlnb	A330035P11Rik
	Trim15		Map3k13	Glyctk
	E130008D07Rik		Map3k19	Tm4sf20
	Enpp5		Shisa2	Shroom1
	Runx2		Kif3a	Dsel
	F630040K05Rik		Cpne9	Jmy
	Rftn1		Cmtm2a	Mir1956
	Fsd1		Prmt2	Slc16a6
	Tnfaip8l1		Rttn	Stc2
	Fbxl17		Anln	Dubr
	Tmem232		Ppp1r12a	Trarg1
	Txndc2		Ppp1r12b	Ciart
	Gm49938		Snx32	Mirc35hg
	Themis3		Cdh13	Hmgb3
	Ptprm		Cdh18	Prdm14
	Arhgap28		Rab9b	Zfx
	Epb41l3		Pld5	Scaf11
	Lpin2		Pld1	Gpr179
	Gm4566		1700125G22Rik	Gm12238
	Clip4		Gstt3	Coch
	Ehd3		Gstt2	Zfp572
	Galm		Scamp1	Il20ra
	Gtf2a1l		Stra6l	A730090N16Rik
	Zeb1		H2-T10	Sv2b
	Dsg1a		Ldb2	Zfp326
	Asxl3		Champ1	Csnk1a1
	Mapre2		Lrguk	Mfsd4b4
	Tpgs2		Spef2	Ccna2
	AW554918		Xlr3a	Gtf3c3
	Celf4		Flicr	Npy2r
	Epb41l4a		Abtb2	Yy2
	Pkd2l2		Il17rb	Tab3
	3222401L13Rik		Dnah7b	1700001G17Rik
	Spry4		Dnah7a	Cr2
	9630014M24Rik		Sntb1	Pabpn1
	Arhgap26		Tfap2b	Prr15
	Gm50214		Osbp2	Fam83b
	Dpysl3		Fam160b1	6430548M08Rik
	Mcc		Samd4	Tcf20
	Gm31706		Samd5	Helb
	A330093E20Rik		Adgrg1	Gm5941
	Prdm6		1300002E11Rik	1700001K19Rik
	Gm15345		Atg4a	Lin54
	Ablim3		Stk35	P2ry1
	4930503L19Rik		Stk36	Six4
	Poli		Rab7b	Stab1
	Ctif		Terb1	Tmsb15b1
	Katnal2		Ntm	Arih1
	Pstpip2		2410141K09Rik	Mmrn1
	Pard6g		Tmem38a	Ntn3
	Tshz1		Rap1gap2	Amz1
	Cndp1		Atf7	Gm9926
	Rttn		Atf6	Serpind1
	Cd226		Atf3	Rlf
	1700030N03Rik		Paqr8	Pcdhac2
	Gal		Lrp1	Atcay
	Gm36608		Lrp6	B630019K06Rik
	Tmem151a		Map9	1700065O20Rik
	Zp1		Dis3l2	5730455P16Rik
	Ms4a6d		Frzb	Gdf5
	Oosp2		Fads3	Ankrd35
	Oosp1		Eps8	2410004I01Rik
	Oosp3		Nsrp1	Zc3h13
	Gna14		Mecp2	Mucl3
	Apba1		Pik3r3	Kdm5b
	Gm9895		Iqgap2	Slfn8
	Prkg1		Plekhb1	Gm10037
	Asah2		Dnaaf3	Ly6g5c
	Rnls		8430429K09Rik	1700019M22Rik
	Ifit1bl2		Tlr5	Larp4b
	Slc16a12		Prok2	Nabp1
	Hectd2		Ankdd1b	F930017D23Rik
	Cyp26a1		Coro2b	Zfp85os
	Cep55		Ell	Cul3
	Plce1		Tmem151a	Etd
	Cc2d2b		LOC106557447	Srsf1
	Opalin		Echdc1	Il31
	Sufu		1700001L05Rik	Defa29
	Ina		Srd5a3	Rsrc2
	Sorcs3		Itprid1	Kcna7
	Afap1l2		Zkscan17	Zfp428
	6720468P15Rik		Zkscan16	Utp14b
	Atrnl1		Spock3
	Gfra1		Tnfaip8
	Kcnk18		Dmrt2
	Prex2		Gpr158
	Tbc1d8		Reep2
	Dnah7a		Pdgfc
	1700066M21Rik		Agap3
	Tmem237		Tbc1d8b
	Cdh19		Snca
	Rassf5		Zfp551
	Prg4		Ispd
	Suco		Pinx1
	Syt14		Gm11264
	Plxdc2		Pglyrp2
	Ccdc73		Epha6
	Wdr76		Trim26
	Gm14004		Pdzd2
	Jag1		Gatad2b
	Zfp442		Thnsl1
	Xlr4a		Carmil1
	Radx		Pex26
	Bend2		Sorl1
	Nhs		Pm20d1
	Nceh1		Lama2
	Slc25a31		St7
	Col24a1		Fsd1
	Gm43574		Muc20
	Msh4		Zbed3
	Mos		Gtsf2
	Fsd1l		Kbtbd7
	Zfp618		Kbtbd6
	Hacd4		Ip6k3
	Cyp2j12		Ip6k2
	Pramel29		Grxcr1
	Prdm16		Grxcr2
	Elapor2		P3h2
	Sema3d		Ggta1
	Gm42560		Fam129c
	Gm35191		Pip5kl1
	Stim2		Tmem30b
	Nfxl1		Krt88
	Prkg2		9930014A18Rik
	Ccdc18		Cfap77
	Pde6b		2810408I11Rik
	Tbx3os1		Mat2b
	Ift81		Grin2b
	Ttyh3		Grin2a
	Zar1l		Wasf3
	Bmt2		Srgap1
	St7		Mcur1
	Aass		Cd5
	Smkr-ps		Dnm3
	Bpgm		Vopp1
	0610033M10Rik		Tmbim7
	St3gal5		Tmbim6
	Sspn		Nhlrc2
	Epp13		Gm14635
	Obox2		C2cd2
	Nlrp5		Emilin2
	Zfp235		Elf1
	Zfp60		Elf2
	Zfp74		Nfxl1
	Tdrd12		Ythdf3
	AW146154		Hrh2
	Bnc1		Padi4
	Anks4b		Padi6
	Gm32916		6820408C15Rik
	Edrf1		Phf8
	Aig1		Aknad1
	Raet1d		Tmem117
	Lama2		Lemd1
	Tube1		Capn7
	Plxnc1		Oacyl
	Abhd13		Gigyf2
	Plat		Myo9b
	None		Ankrd12
	Cfap97		Esrrg
	Sgo2b		Gpr3
	Chd9		Gpr1
	Terb1		Zfp750
	Mat1a		Arhgap20os
	Gm6526		Ywhab
	Gpr137c		Nrep
	Gm10364		Fndc5
	Cryl1		Oog4
	Senp8		Lrrc27
	Dock3		Lrrc28
	Fbxw21		Rab11fip4os1
	Fbxw14		Fam90a1a
	Fbxw28		Dnajb4
	Fbxw16		Xrcc2
	Fbxw19		Camsap1
	Fbxw15		Pfkp
	Fbxw26		Pfkm
	Chac2		4933412E12Rik
	Fstl4		Cnga4
	Gdf9		Msh4
	Tex14		Ppp1r3a
	Myl4		Gramd1c
	Cpsf4l		Nipal2
	Gm30239		Chdh
	Gmds		Naip1
	Lratd1		BB123696
	Etv1		Paip1
	Gm19276		Scn8a
	Gm33301		Rph3a
	Alg10b		Mtss1
	D030018L15Rik		Gabrr3
	A630010A05Rik		Nim1k
	Il1rap		Ccl6
	Rubcn		Ccl4
	Ccdc14		Nbdy
	Iqcb1		Mapkbp1
	Stxbp5l		Adipor2
	Fstl1		Zfp341
	Nectin3		Ube4b
	Dcbld2		Fam171a1
	Ftdc1		Phka2
	1700010I14Rik		Pcdhb17
	Dnah8		Pofut2
	Efna5		Olfml1
	Nlrc4		Slc36a4
	Arhgap12		Slc36a1
	Cfap53		Bmper
	Htr7		Rxfp2
	Dclre1a		C130060K24Rik
			F5
			Rdh11
			Micu2
			Veph1
			Iqck
			Mnd1
			Ica1
			Gpatch8
			Asb3
			Asb8
			Rraga
			Rragc
			4930428O21Rik
			Lig4
			1700066M21Rik
			Mfsd6
			Dip2c
			Pomk
			Runx2
			AW549542
			Gm8013
			Cbfa2t3
			Eif4enif1
			Ryk
			Pcbd2
			Pcbd1
			Myo16
			Myo1h
			Myo1c
			Ccny
			Naa16
			Naa11
			Slc17a6
			Slc17a2
			Agpat1
			Zbtb16
			Zbtb18
			D10Wsu102e
			Atxn2l
			Vit
			1810043G02Rik
			Fam167a
			Rell1
			Ehbp1
			Gm10248
			Nsdhl
			Amotl1
			Tctn2
			Tctn1
			Blzf1
			Bbs4
			Plac8
			Ampd3
			Top1
			Zfp612
			Kctd10
			Kctd17
			Kctd16
			Fchsd1
			Pthlh
			Zdhhc24
			Ube2d3
			Erich5
			Sav1
			Fkbp14
			Fkbp15
			Nedd4l
			Pgpep1
			Pcolce2
			Slc4a7
			Slc4a9
			Slc4a8
			Osgin1
			Dcbld2
			Fyn
			Stxbp4
			Rnls
			Alx1
			Lypd6b
			Smim19
			Plxna1
			Pard3b
			Zfp423
			Slc25a31
			Ldlrad4
			Prkcb
			Tom1l2
			Tom1l1
			Umad1
			Homer2
			Tead3
			E330011O21Rik
			Slc35f6
			Inpp5a
			Il34
			Eny2
			Osbp
			Syn2
			Syn1
			Nrn1l
			Arhgap12
			Arhgap10
			Dedd
			Catsper3
			Gpr165
			Nsun3
			E330021D16Rik
			Exo5
			Vash2
			Rbl1
			Mtf1
			Cenpq
			Ptpn21
			A930012L18Rik
			Sumf1
			Dcaf7
			Dcaf5
			Gabrb2
			Ralgapb
			Xlr4c
			Bmp2k
			Rere
			Zup1
			Zfp174
			Dchs2
			Ubap2l
			Mettl18
			Casc1
			Rab21
			Esr2
			Egfr
			Rab2a
			Whamm
			Cfap46
			Cfap45
			Igsf11
			Dcaf12
			Zp3r
			Tekt4
