# Supplementary material for: ZFP560 facilitates KAP1-dependent chromatin repression to regulate exit from totipotency
Source: Research Square preprint supplement (doi:10.21203/rs.3.rs-7290036/v1), 2025-08-25
Supplement: Supplementary file 6 [file 81916f0d67748075db2700ed.xlsx]

## Sheet: GO BP
GO BP	Count	p value	Gene	Fold Enrichment	FDR
endodermal cell fate commitment	5	8.93914e-05	PAF1, CTNNB1, RTF1, CDC73, POU5F1	17.3932	0.00380538
ribosome biogenesis	52	7.66339e-40	LTV1, NVL, PAK1IP1, AATF, PWP1, WDR43, IPO4, XPO1, C1QBP, RIOK2, RIOK1, UTP14A, UTP15, AFG2A, DDX56, WDR75, DDX51, GNL2, FTSJ3, EBNA1BP2, DKC1, GRWD1, MRTO4, SDE2, NAF1, DDX27, RRN3, NOC4L, SNU13, SDAD1, TMA16, PES1, RRS1, RRP36, HEATR3, BRIX1, DCAF13, NOP14, NOP58, UTP4, RIOK3, XRCC5, WDR12, BYSL, CUL4A, BOP1, RPS28, GNL3L, EIF6, MPHOSPH10, NOL11, NOP53	11.0106	1.01131e-36
regulation of stem cell differentiation	9	9.9142e-07	KDM3A, HDAC2, MTA1, RBBP4, HDAC1, MTA2, MTA3, GATAD2B, GATAD2A	10.4359	8.17715e-05
epigenetic programming of gene expression	3	0.0307929	ZFP57, TRIM28, DNMT3A	10.4359	0.280896
heterochromatin formation	15	3.129e-06	HELLS, H2AZ2, HDAC2, CBX3, HDAC1, EED, UHRF1, DNMT3A, MACROH2A2, MACROH2A1, LMNB2, H2AC25, H2AC20, LMNA, EZH2	4.68278	0.00023373
chromatin organization	52	1.08494e-12	SMARCB1, KDM1A, KDM1B, ASH2L, NUCKS1, CTCF, TRIM28, TLK2, WDR5, KAT7, BRD3, BRD2, PRMT5, PRMT7, GPX4, KDM2B, EED, ACTL6A, DNMT3A, HCFC1, DNAJC2, MORF4L2, HAT1, MTF2, WAC, KDM3A, HDAC2, L3MBTL2, HDAC1, UHRF1, KMT2B, RTF1, MACROH2A2, MACROH2A1, RNF2, RBBP4, RBBP5, H3C1, BRD9, ATG7, SUZ12, H2AZ2, CBX3, UTP3, EYA3, HMGA1, DEK, TDRD3, PWWP3A, OGT, BAP1, EZH2	3.14199	2.52665e-10
in utero embryonic development	40	2.34046e-08	NCKAP1, CCNK, RRN3, ELL, PRKCSH, PITPNB, CUL3, SRSF1, RTCB, PLOD3, YBX1, CTCF, N4BP2L2, TTN, INPP5B, CCNB2, CCNB1, SMPD4, TRIM28, KIF3A, NBN, SLC25A20, CERT1, WDTC1, PRMT1, ESRRB, TPM1, RPA1, MTSS1, TBX3, BYSL, GATAD2A, CUL4A, KIFBP, SP1, ERCC2, ERF, NMT1, CTNNB1, BAP1	2.75926	2.72526e-06
protein localization to kinetochore	6	7.17771e-05	IK, ZWILCH, ZW10, CDK1, TTK, BUB3	12.1752	0.00322915
