# Supplementary material for: ZFP560 facilitates KAP1-dependent chromatin repression to regulate exit from totipotency
Source: Research Square preprint supplement (doi:10.21203/rs.3.rs-7290036/v1), 2025-08-25
Supplement: Supplementary file 7 [file a50e2a32bd0d996be56863fa.xlsx]

## Sheet: Zygote--blast
	Zygota	2-cell early	2-cell mid	2-cell late	4-cell	8-cell	16-cell	blast early	blast mid	blast last
Zbbx	0	0.0128031	0.0183605	0.383732	0	0.114608	0.438317	0.00958811	0.00216546	0.00864761
Zbed3	5638.65	3920.89	2290.71	1124.42	66.9749	9.28922	34.977	1.2431	5.3702	1.43584
Zbed4	71.9079	73.9911	82.9003	85.4787	119.189	87.9802	76.8559	78.961	85.1283	82.0573
Zbed6	0.0232394	0.0431278	9.63651	10.6738	5.52208	1.93566	3.76592	4.38316	5.08064	4.55813
Zbtb1	2.08991	2.89755	1.80199	2.61989	6.85342	3.94776	8.04695	6.27484	3.07893	3.16042
Zbtb10	27.3874	31.3149	110.458	112.986	158.471	96.98	57.5698	25.1647	42.4692	47.739
Zbtb11	19.5052	21.6523	63.625	61.661	86.1473	43.9852	41.9135	19.337	21.0169	23.7322
Zbtb12	0.945375	0.180785	0.0148914	0.21969	0.21541	1.08546	0.498407	0.15363	0.245658	0.00211943
Zbtb16	93.5077	72.6358	15.8231	7.9443	2.18653	0.439092	1.15825	0.289382	0.524491	0.0623356
Zbtb17	4.61615	2.5348	20.8296	44.4995	78.8409	35.124	24.6619	15.966	22.2493	15.6746
Zbtb2	6.58277	7.6785	7.50854	7.72043	8.96311	8.40263	7.94896	4.33409	9.62122	5.2153
Zbtb20	0.851395	0.42366	1.04856	1.64579	0.255216	0.623719	0.0201754	0.127701	0.0922552	0.266068
Zbtb22	0.770753	0.792487	0.521111	0.311247	3.85915	3.20091	2.86062	1.40933	3.43895	4.231
Zbtb24	13.3	13.6636	8.95706	19.0589	8.85798	4.91372	4.86016	4.05597	7.34184	5.0273
Zbtb25	2.67252	0.848157	2.03628	0.0108726	0.015644	1.06488	0.472702	0.96959	1.85858	4.41808
Zbtb26	1.25351	1.07624	2.64613	0.93003	3.40446	1.14283	2.36883	0.639718	2.62996	0.683453
Zbtb3	0.034618	0	0	2.06221	6.34762	3.13107	4.45036	5.11783	5.57758	5.47943
Zbtb32	0.796005	0.435165	0.472518	3.64306	0	0.057334	0.135201	1.10025	1.7604	0.427766
Zbtb33	8.79525	10.0932	4.26794	3.24352	4.15215	0.333854	0.318938	0.0725107	0.0409624	2.01114
Zbtb34	5.36791	4.61332	8.26465	7.58432	22.4329	8.77286	5.82594	5.14368	3.20759	1.08603
Zbtb37	15.4289	22.0006	18.0391	21.1128	12.3757	3.32847	3.66923	0.703336	0.870776	1.06998
Zbtb38	0.223056	0.669222	0.0424803	0.031486	0.016746	1.00837	0.0355311	0.255019	0.142103	0.193777
Zbtb39	1.77217	1.46681	0.548336	1.03259	1.33363	1.90305	1.00328	0.357587	1.38125	1.12131
Zbtb4	0	0.0360483	0.224312	0.306764	0	0.0415874	0.00680696	0.000973958	0.330817	0.00181577
Zbtb40	1.24772	1.46631	1.16261	0.989654	3.21047	2.22903	5.06696	2.377	2.43346	9.68024
Zbtb41	5.16861	7.11296	10.4188	6.34442	9.77765	2.2051	2.12499	1.98394	1.35161	2.38258
Zbtb42	0	0	0	0.251396	0.0732689	0.212081	1.60593	0.247873	0.0503103	0.493184
Zbtb43	1.62794	1.49592	26.8727	73.3512	34.3517	22.2745	20.431	12.4248	16.697	9.61995
Zbtb44	13.1016	15.8498	11.5191	13.9796	11.8977	12.7341	11.4459	15.949	16.6853	13.6148
Zbtb45	29.9526	12.5789	10.3004	8.34342	8.91263	4.12397	3.08349	7.48491	8.00203	5.19994
Zbtb46	11.6064	11.0865	4.40351	4.25546	0.138919	3.93371	2.35243	2.97262	0.657225	3.5028
Zbtb48	2.70382	0.571771	5.15551	9.62036	9.04822	13.049	10.0127	3.58319	9.42285	3.95103
Zbtb49	0.656278	0.937938	0.793927	1.79613	0.31241	0.166836	0.784315	0.139298	0.484003	0.349511
Zbtb5	0.726597	1.21355	61.0326	69.2854	28.6962	6.31532	7.9224	1.53933	5.61195	1.73739
Zbtb6	0.203817	0.211872	0.860109	5.14635	7.10774	2.70512	2.63611	1.92533	1.0571	1.45196
Zbtb7a	0.48296	0.0579257	1.56424	1.62034	3.05959	1.36706	1.04444	1.2056	1.7352	0.937583
Zbtb7b	4.33402	2.7991	4.54542	2.62381	8.60439	13.299	10.291	9.55707	8.46156	8.98016
Zbtb7c	2.33934	1.7035	1.12944	1.08351	0.0931946	0.385444	1.22549	0.29283	1.03688	0.0347202
Zbtb8a	0	0.139308	9.07508	16.5983	18.4265	5.88797	3.32134	2.32262	4.33527	1.23755
Zbtb8b	24.9638	20.2417	5.01824	9.35814	2.51378	4.19412	1.63271	1.6712	1.1364	0.030036
Zbtb8os	8.47279	6.95471	10.6224	28.7495	28.844	52.3032	43.2149	106.165	83.6548	72.8894
Zbtb9	5.64726	4.46353	17.0848	37.8993	19.6975	7.99401	7.9161	4.56203	3.65498	5.00241
Zc3h10	2.72507	4.0814	3.48638	7.69196	3.01819	3.26188	6.70792	2.46752	4.19383	6.71688
Zc3h11a	87.3414	67.3917	75.7163	90.6009	85.7371	35.7347	35.8695	62.9292	105.469	101.524
Zc3h12a	0.00301351	0	8.78594	9.97986	3.34709	2.66533	2.64385	0.0939325	0.119829	0.323784
Zc3h12b	0.292241	0.427464	0.28621	0.112929	0	0.00613989	0.0990418	0.0205649	0.00209663	0.00112474
Zc3h12c	25.2344	33.4927	9.3045	12.8597	10.81	18.4205	11.0497	0.665912	0.733461	1.44847
Zc3h12d	0.605821	0.603993	0.480368	1.59451	0.00188512	0.0389346	0	0	0.000250024	0
Zc3h13	25.1317	19.8301	23.0715	37.9207	29.6128	13.2318	16.8189	16.7858	21.1166	10.1829
Zc3h14	40.55	70.3643	123.182	88.5015	50.8305	55.2204	36.0551	37.3294	31.6582	22.7789
Zc3h15	223.862	232.589	364.764	306.511	364.94	240.688	197.74	117.209	116.734	113.512
Zc3h18	31.6046	15.2816	40.2816	36.5173	31.9451	16.9493	14.889	9.24711	12.0157	10.8982
Zc3h3	84.2086	65.1101	33.5141	20.1891	4.86623	7.52367	6.54903	13.3535	13.0533	16.9917
Zc3h4	11.029	18.2335	16.4848	12.5791	13.4286	6.47017	4.73204	3.32066	9.32694	3.15735
Zc3h6	48.6855	57.7345	13.7469	3.6801	1.25439	0.265326	0.18304	0	0.858102	0.0161936
Zc3h7a	0.672341	1.11492	1.61859	0.471341	1.56181	3.62225	6.05251	12.63	19.0203	9.4221
Zc3h7b	14.1695	18.2769	14.3504	5.83016	3.09873	3.02592	3.98685	1.74662	1.83017	0.692387
Zc3h8	45.9653	38.9088	26.5257	15.7601	41.3047	30.5182	28.0389	14.9784	8.94541	13.4484
Zc3hav1	0.00380931	0.0128293	3.10184	4.7054	1.43408	1.8489	0.778764	18.2275	27.6343	14.4044
Zc3hav1l	0.00394302	0	0.203984	0.589766	2.48898	0.519264	0.0301676	1.36404	1.49351	2.52688
Zc3hc1	0	1.83601	198.587	271.81	204.716	327.69	366.13	95.6205	119.025	50.0424
Zc4h2	9.10881	14.3092	3.08073	2.34656	0.00334037	0.674205	0.00195756	0	0.0188407	0.0247071
Zcchc10	327.191	226.382	174.515	182.776	72.4813	80.6082	80.17	69.4339	59.8272	64.9084
Zcchc11	0.515621	0.130543	4.22969	4.74332	3.95939	5.34402	6.36668	11.8427	8.91965	4.12535
Zcchc12	0	0.271373	0.323972	0.0479122	0	0.0132542	0.000722396	0	0	0.00133034
Zcchc13	0	0	8.69358	29.0554	1.90006	0.0219823	0.00653773	0.00872625	0.00711736	0.00372654
Zcchc14	10.2862	7.70106	5.11382	3.79148	2.50288	0.600192	0.465845	0.950932	2.89404	1.9963
Zcchc16	2.92437	2.88984	11.0786	5.97325	6.67686	0.0433356	0.000753402	0.000462782	0.0144131	0
Zcchc17	263.354	119.481	42.1983	82.6201	69.7183	70.3227	71.3545	66.2869	84.3843	65.9954
Zcchc18	0.0769198	0.0635649	0.167549	0.443215	0.00374831	0.115418	0.000669944	0.00081874	0.00233766	0
Zcchc2	20.2781	18.6255	10.3218	8.36882	7.63063	1.0494	2.28848	1.99485	6.64877	2.48533
Zcchc24	0.0628266	0.351392	0.281332	1.82756	0.00163697	0.301149	0.20414	1.49605	0.000341481	0.11487
Zcchc3	64.1725	42.4593	19.8921	12.4386	7.08933	14.6718	14.2007	6.84665	8.26846	9.07168
Zcchc4	2.03729	1.16607	0.182836	0.864141	2.81381	5.41115	3.8393	3.10792	8.15493	3.3943
Zcchc5	0.101794	0	0.536981	0.152008	0	0	0	0	0.00087034	0
Zcchc6	7.33742	6.74573	6.01393	13.4377	11.5217	5.77724	3.79303	4.58227	11.6424	4.27778
Zcchc7	18.1811	10.9801	14.4145	41.5739	23.7579	16.8299	23.7247	27.4478	26.6797	25.8225
Zcchc8	78.7947	62.501	21.0997	13.7105	7.16898	6.90536	13.3883	15.5881	28.2591	13.5185
Zcchc9	4.66438	2.53886	13.4365	18.9626	46.7689	38.4755	18.3903	24.4011	24.6935	18.5549
Zcrb1	108.287	11.8498	76.6047	98.9154	92.313	81.7291	74.3795	36.262	39.056	45.2082
Zcwpw1	6.57035	6.9642	5.60595	8.21408	13.4777	7.28796	11.3515	2.4214	5.15774	7.29446
Zdbf2	0.389032	0.58489	1.41258	2.6144	0.817682	0.174097	0.953754	0.85171	0.495655	0.482303
Zdhhc1	0.0322363	0.0976833	0.833884	1.00463	0.079038	0.117128	0.178203	0.193529	0.288862	0.233871
Zdhhc11	0	0	0	0.00172725	0	0	0	0	0	0
Zdhhc12	17.7587	17.3826	4.25663	27.6154	13.7086	18.9618	9.28933	126.631	95.6678	116.792
Zdhhc13	18.624	21.8282	2.69631	0.936045	2.85823	1.99131	4.44659	5.52243	7.70984	9.76341
Zdhhc14	11.005	7.7518	1.8272	1.42127	0.127652	0.350491	0.000988941	0	0.0144732	0
Zdhhc15	0.844566	0.326934	0.137415	0.0130388	0	0.313308	0.273061	1.44928	0.755028	0.211655
Zdhhc16	4.46723	6.03884	5.56181	4.5669	2.35776	7.20574	5.5472	28.5478	29.1387	17.0273
Zdhhc17	3.06407	2.17091	1.69046	1.38167	4.77678	3.12246	2.27933	4.95807	6.36915	9.86052
Zdhhc18	25.1858	13.3526	8.11556	5.74831	4.51417	4.13948	5.48628	1.4168	2.08961	4.1145
Zdhhc19	0	0	0	0.00307007	0	0.489701	0.00243326	0.16028	0	0
Zdhhc2	0.0102853	0.0382201	0.00474412	0.0260218	0.00203243	3.08619	2.96515	5.79362	2.99974	14.6132
Zdhhc20	12.5862	9.43915	14.3408	37.6167	50.1382	33.5009	42.5424	30.0752	23.4144	16.1777
Zdhhc21	0.201783	0.0284878	0.265669	0.0917032	1.11337	0.746433	0.43343	3.29892	2.44268	3.42922
Zdhhc22	0	0	0	0	0	0	0	0.00238785	0	0
Zdhhc23	0.0764283	0	0	0.0332177	0.0712142	0.351688	0.00603639	0.144481	0.171263	0.0802421
Zdhhc24	19.6645	9.00813	2.85312	1.25956	5.64137	3.32514	6.50132	1.85995	3.77728	1.69891
Zdhhc25	0	0	0.0813374	0	0	0	0	0	0.00229893	0
Zdhhc3	11.5522	10.2781	8.72466	4.98751	8.76386	11.1415	11.0012	11.9823	14.2656	12.3632
Zdhhc4	2.15257	3.99674	0.949755	21.6995	10.7075	18.8155	24.3288	47.6785	69.1438	55.9797
Zdhhc5	25.8607	19.9454	33.0516	28.67	12.1472	8.66501	7.57927	8.11496	6.83564	8.02674
Zdhhc6	21.2371	33.9821	16.1754	12.4278	17.9424	23.994	26.6623	66.1885	56.9384	54.572
Zdhhc7	12.808	3.71335	10.6492	67.9073	56.9425	40.1029	19.6749	5.85506	10.7095	15.4011
Zdhhc8	17.0864	11.4656	6.84675	3.06107	0.194396	0.084787	0.363504	0.000498081	0.0326268	0.0500656
Zdhhc9	0.01569	0.411108	0.211769	0.227021	0.387859	0.0311296	0.416675	1.122	0.260876	2.13916
Zeb1	0.416117	0.816517	1.27083	0.347537	0.0690441	0.416083	0.00957515	1.23832	1.54798	0.596891
Zeb2	0.00326959	0.0537679	0.109772	0.0325935	0.00199258	0.103177	0.00447499	0.000667275	0.00514224	0.00128741
Zer1	0.319267	0.100033	0.0141996	1.31502	1.56356	2.99748	1.89657	1.18633	2.49767	2.52891
Zfa	0.00642161	0.0142203	0.616601	0.61162	0.783183	0.544774	0.378737	0.28998	0.256864	0.192861
Zfand1	2.70469	2.34435	1.06998	1.44697	1.71031	34.5722	23.1069	75.3679	116.021	74.0671
Zfand2a	41.7303	26.0389	118.842	180.473	174.753	99.9331	84.6925	17.7896	33.9547	13.0642
Zfand2b	10.5246	12.0773	5.78826	6.12772	6.18577	58.5336	56.6649	27.8683	46.0379	30.633
Zfand3	11.1759	6.5239	5.75489	5.602	8.44949	6.20229	4.97732	5.70061	7.07067	6.78136
Zfand5	33.7762	34.0635	63.2968	101.627	113.889	32.8973	20.6152	11.9304	10.4617	10.0991
Zfand6	188.065	250.572	340.859	266.967	97.8604	48.3757	47.0779	38.6564	31.4138	42.5309
Zfat	1.87884	1.47443	0.0446086	0.693668	3.53088	3.58162	3.14416	2.56678	5.02531	3.93166
Zfc3h1	8.44849	10.7883	5.56867	15.007	16.4781	2.65672	3.89938	5.14091	12.465	11.3157
Zfhx2	0.385304	0.479407	0.55997	0.687676	0.0128863	0.00889354	0.0565929	0.606558	1.59437	0.337081
Zfhx2as	0	0	0	0	0	0.972749	0	0	0	0.0773981
Zfhx3	3.98601	3.36938	2.85633	2.13288	0.665627	0.215723	0.250687	5.81993	5.40937	3.21146
Zfhx4	2.12208	1.82655	2.20552	1.13537	0.0589343	0.00742632	0.000270273	0.000321214	0.00889766	0.000650063
Zfml	28.2116	36.8099	17.4348	18.4486	57.6791	23.2606	21.2097	36.4766	39.3418	37.2385
Zfp1	4.0955	0.880397	30.3686	53.4013	34.3885	17.4225	19.8938	34.649	44.8689	25.0825
Zfp101	0.0434378	0.15802	4.72082	3.98773	9.76367	2.69264	4.23557	5.33939	4.16158	4.15676
Zfp105	0.529399	0.0826596	20.8962	7.97378	1.57429	0.821303	2.55048	5.97064	4.74907	4.67391
Zfp106	28.9587	27.5265	49.1704	49.835	55.7431	46.9796	29.0838	42.1882	46.7007	34.2833
Zfp108	79.6247	68.4934	13.2129	9.38205	1.01414	0.571116	0.97872	1.37838	4.47293	0.227685
Zfp109	0.3474	1.37728	0.477206	0.128031	0	1.22735	2.55242	1.88562	1.43206	0.355356
Zfp11	0.361434	0.0630745	0.0864266	0.379156	0.102271	0.0672174	0.379898	0.0891765	0.275278	0.186949
Zfp110	4.28332	5.71394	2.47109	4.45209	15.5341	9.13643	15.565	19.5439	22.3257	12.5018
Zfp111	2.01683	3.69349	2.00445	0.655124	0.327136	0.139663	0.24863	0.578803	1.85917	1.00441
Zfp112	0.0130285	0.182655	0.0791435	0.00229368	0	0.00189398	0.00510757	0.00160757	0.371254	0.00167647
Zfp113	3.2075	6.58914	14.3462	15.1541	10.7556	2.36954	1.67703	1.16911	1.00155	0.911165
Zfp114	3.40423	5.27749	0.695463	0.927675	0.136387	0.0836985	0.52011	0.365021	0.509689	0.104545
Zfp119a	1.25929	2.15325	0.373889	0.775968	2.44872	0.294765	0.0966894	4.6067	2.26934	0.0489633
Zfp119b	0.115127	1.06617	1.17065	0.845671	3.46598	0.616786	2.64256	2.05318	4.46943	1.73207
Zfp12	0.110658	0.0043952	0.0964682	0.0326653	0.554717	3.13628	3.62766	1.7178	0.472067	0.321967
Zfp120	15.3869	15.9361	4.89733	14.1134	7.67284	2.72244	3.12448	2.23476	4.05281	6.40503
Zfp128	0	0	0	0.00498869	0	0.0263938	0.000875598	0.00165131	0.0039504	0.00114728
Zfp13	0	0	0.0376093	0.851848	1.23577	1.13502	0.368168	1.92544	8.09387	2.38508
Zfp131	0	0	0	0	0	0	0	0	0	0
Zfp131	0	0	0	0	0	0	0	0	0	0
Zfp133-ps	0	0.00678012	0	0.00443374	0	0	0	0	0.00116289	0.00284505
Zfp14	0.234099	0.721286	0	0.0209561	0	0.202001	0.343128	0.546439	0.610013	0.557877
Zfp142	14.4239	13.9826	19.5373	34.6462	10.2516	4.28655	2.00786	3.89667	5.43006	2.95792
Zfp143	12.4341	11.3903	36.3636	77.8463	104.923	47.4929	50.9439	14.2982	18.4738	19.6782
Zfp146	0.0100099	0.367591	0.956226	0.112981	0.063563	1.82962	0.266987	1.14358	0.878471	1.01926
Zfp148	16.738	15.2519	16.9833	21.5272	17.5181	16.0506	14.8386	6.91197	8.60674	8.42724
Zfp157	0.365788	0.221215	0.241992	0.0377303	0.13588	0.884841	0.52809	3.71407	5.8936	0.998765
Zfp160	2.4395	2.10156	2.99738	2.80741	8.52285	2.98778	3.9462	9.09639	10.6465	7.44935
Zfp161	2.21516	3.05295	3.66528	5.95811	4.57871	10.0055	11.7402	7.97289	14.7347	7.25106
Zfp167	0.856319	2.65704	0.426022	1.34895	0.385324	1.79382	0.546819	2.12041	1.07797	0.319747
Zfp169	4.67318	5.53766	0.959556	0.416065	0.382389	0.00741842	0.0012034	0	0.00258798	0
Zfp174	1.69695	2.20318	0.558937	0.0624738	0.483455	0.107585	0.365652	0.17773	1.4161	0.00100914
Zfp180	0.498461	0.298937	0.326125	0.778671	20.6257	6.30351	11.3133	4.19662	7.00601	6.93264
Zfp182	1.67285	1.47099	0.803219	1.33483	1.49109	0.625913	2.13838	0.781575	2.20126	1.04691
Zfp184	5.45114	2.82001	4.60409	1.60637	4.99737	4.09407	4.00566	3.25003	1.30797	1.29361
Zfp185	0.0979825	0.122147	0.0387814	0.312961	0.0020974	0.0297447	0.352699	6.08729	1.24946	10.8916
Zfp187	1.74621	2.73861	0.419558	10.3173	24.217	7.77163	6.7129	17.7189	14.8059	32.5326
Zfp189	0.0158501	0.0216694	1.89311	0.213609	0	0.390123	0.756116	0.952132	2.06372	0.983659
Zfp191	2.04294	0.318762	0.0305648	2.06875	2.21028	7.35808	7.86133	8.39413	17.7871	12.5427
Zfp192	5.21645	5.21395	0.409442	1.21579	1.7316	0.163749	0.0930522	1.22665	1.69092	0.829912
Zfp2	0.00276262	0	0	0.0210328	0	0.198771	0.285546	2.68626	2.62176	3.18398
Zfp202	0.873514	2.1701	0.144216	0.107604	2.77322	0.148836	0.333892	0.0212371	0.0230573	0.105865
Zfp207	127.882	158.089	166.129	279.191	360.961	112.968	196.41	181.071	142.684	235.917
Zfp212	70.2058	54.4798	20.3808	11.6824	6.97024	3.19435	5.7322	2.98341	7.33874	0.836978
Zfp213	0	0	0.00805045	1.29023	0.891143	1.01071	0.931152	5.66901	6.15243	1.40327
Zfp217	5.19783	6.16872	119.16	88.8585	33.8127	31.3477	20.387	10.8513	8.83928	8.54441
Zfp219	0.0762655	0.372303	0	0.00825761	1.21679	0.496511	0.721172	0.6146	2.2049	1.4712
Zfp229	11.7633	14.3184	20.6751	25.1733	9.45928	1.70412	2.21924	1.4612	1.10383	1.35033
Zfp235	18.8026	16.396	2.62788	2.6714	2.29673	0.871039	1.22595	0.322202	3.02241	0.981458
Zfp236	3.1389	3.2815	4.96045	3.03349	2.86711	2.12848	1.42031	1.91801	3.17231	3.25
Zfp238	5.70332	5.27268	5.06458	2.45202	2.76385	3.02709	2.12438	2.36042	1.43387	2.15647
Zfp239	0.0179818	0.0568843	7.25634	25.0127	25.063	18.6511	14.4626	7.13638	8.43873	1.24737
Zfp248	2.13235	1.77548	0.21628	0.816138	0.00203298	0.103307	0.665365	1.05049	6.47794	0.402169
Zfp251	0	0.00269561	1.01789	3.59648	7.31069	4.54905	2.79676	3.25053	5.07413	4.58657
Zfp259	1.48636	3.30075	32.7505	87.6902	186.514	69.9634	50.8498	24.7277	23.4675	19.5668
Zfp26	0.359695	0.602951	0.817193	0.474168	1.2952	0.827857	0.479003	2.92096	4.92321	2.29247
Zfp260	3.71799	7.55306	2.60109	4.18993	2.44929	2.87345	2.86259	4.66233	4.68364	5.4416
Zfp263	0.505216	0.489014	6.92298	25.3022	12.2743	10.4185	11.3356	10.7604	13.7178	8.34464
Zfp266	0	0.00206091	0.0646735	0.0800708	0.290743	1.09583	0.0338146	0	0.621937	0.0308423
Zfp27	5.68289	13.1742	5.41167	2.39968	1.76605	0.138847	1.26729	2.00599	2.38721	1.43081
Zfp273	1.22197	2.93595	5.18183	3.50042	3.87002	1.69564	0.358446	1.44102	4.56788	1.22604
Zfp275	0	0.00535937	0.00636633	0.306895	0.681549	1.02716	0.478279	0.90449	1.55502	1.36913
Zfp276	2.91458	4.70688	0.854836	2.14881	3.88344	1.5849	1.84035	0.7769	3.61549	2.65593
Zfp277	30.0287	22.3974	11.2581	3.74697	5.90292	24.839	20.9616	32.0099	25.7662	21.5982
Zfp28	2.68231	3.67991	1.08236	1.07542	0.0580861	0.613444	1.01014	0.670343	0.547449	0.561543
Zfp280b	98.9463	119.565	161.11	115.812	89.491	41.3041	45.2961	12.4022	23.0185	11.5719
Zfp280c	0	0	1.50566	0.55442	0.00610624	0.388122	0.00522933	2.56444	10.615	7.25359
Zfp280d	40.8628	40.8775	48.4152	28.8865	30.5874	23.3912	23.2293	9.8526	13.8007	15.2994
Zfp281	2.67464	4.23869	42.4926	32.2075	22.1967	16.9978	21.6313	11.6291	12.081	9.08791
Zfp282	4.16429	2.59148	1.55928	1.16892	4.95169	0.237265	0.714445	1.17885	0.836056	0.927853
Zfp286	0	0	0	0.00953676	0	0.0788755	0.0038415	0.0011785	0.00075304	0.0170826
Zfp287	0	0.0517977	0	0.00755918	0	0.00801587	0.000379182	0.000521769	0.000968194	0.00214549
Zfp292	0.0461206	0.191605	2.21324	13.5505	16.9195	8.33665	7.03469	12.7603	12.4809	8.3479
Zfp295	18.4458	26.4945	15.2718	11.4889	5.11192	2.91723	5.52843	4.1866	4.96438	5.275
Zfp296	22.9442	9.92439	245.914	229.512	241.35	159.95	148.354	57.5923	80.0601	56.3098
Zfp3	6.75032	4.80478	0.185561	3.2215	0.0231062	1.51174	0.445621	0	0.759797	0.255659
Zfp30	0.432801	0.420725	1.93893	1.5701	0	0.121359	0.979646	0.927613	0	0.183754
Zfp300	0	0.00940796	1.673	1.06186	0	0.0237066	0.000430131	0.000938499	0	0
Zfp316	0.186583	0.169444	0.156093	0.284382	0.162884	0.0450765	0.0279919	0.0399526	0.0357507	0.0487092
Zfp317	0.477231	2.16377	1.11198	3.0621	3.32943	2.89998	2.03934	11.5098	9.7912	20.6902
Zfp318	21.4292	21.0719	26.9831	23.5075	11.579	2.39003	3.2233	4.61958	5.38468	2.34807
Zfp319	4.70346	6.80698	5.7012	2.51748	2.67368	0.076519	0.181157	1.78921	1.01277	0.330662
Zfp322a	16.1883	15.484	19.6961	4.92609	5.5471	3.67852	4.63036	15.2707	12.9917	8.0817
Zfp324	0.00735962	0	0.0861766	2.10269	1.35363	0.195118	0.52651	1.35869	1.15716	1.16753
Zfp326	1.80407	1.14064	4.70851	3.31084	1.00656	1.03515	2.52216	5.66255	2.50996	2.51532
Zfp329	1.79982	2.58972	1.88462	0.859662	1.98612	0.992175	2.62219	1.25134	1.0388	0.813697
Zfp330	116.297	146.094	77.5628	103.385	121.85	45.1013	58.023	61.4171	90.192	81.9615
Zfp334	24.48	17.2812	1.75038	1.64991	0.62006	0.000613479	0.338588	0	0.0181053	0
Zfp335	5.42444	6.73124	16.8138	40.0892	51.6386	13.7302	12.5908	5.40005	7.39227	5.5015
Zfp341	7.65271	5.6393	2.77324	4.6408	2.04141	1.8217	2.15373	0.661987	1.09159	0.572012
Zfp345	1.0488	3.10682	6.58649	4.70568	6.31722	6.54406	6.29502	11.6892	7.32353	6.67571
Zfp346	1.45279	0.60724	5.49317	18.9894	5.91919	2.46199	3.14416	1.3769	3.94738	2.47766
Zfp35	9.25704	17.4707	9.44594	5.23825	9.74591	10.4133	13.4135	7.36103	24.2356	23.9041
Zfp352	0.161576	7.41291	431.592	255.194	27.3776	0.2521	0.0152591	0.00940777	0.0228943	0.0693782
Zfp353	0.141599	2.62939	30.2565	13.5942	0.844568	0.0228608	0.0118327	0.00757998	0.0137752	0.0156795
Zfp354a	0.222859	0.390801	0	0.0264295	0.0335807	0.0651519	0.906224	1.81059	0.608572	0.25875
Zfp354b	5.13823	4.1852	0.0994208	0.50954	0.973356	0.0190199	0.499531	0.22973	0.0762741	0.0167145
Zfp354c	0.42351	0.265171	0.0710258	0.010611	0.0074626	0.14149	0.100435	0.103006	0.0564875	0.488169
Zfp358	0	0	0	0	0	0.0383904	0	0.044804	0.104901	0.0673195
Zfp36	0	1.52087	80.2767	47.285	66.821	44.47	30.777	16.8164	18.0033	8.67023
Zfp362	1.24478	1.21935	0.714111	0.119988	0	0.276665	0.0579398	0.0721475	0.210493	0.244647
Zfp365	0	0.169731	0.0153246	0.00531808	0	0.0239934	0.000398952	0	0	0.00266404
Zfp366	0	0	0	0.0122273	0.0037072	0	0.00170601	0.00172469	0	0.00307224
Zfp367	0.230248	0.738439	99.1179	94.4977	53.271	8.74035	12.3837	11.4333	10.2459	8.40008
Zfp369	0.0301939	0.0533788	2.2512	2.89915	0.100867	0.0796511	0.187389	0.22742	1.46944	0.863726
Zfp36l1	0.238027	0.405997	1.42361	0.61754	0.617471	0.631496	0.477342	17.9759	14.2982	20.8908
Zfp36l2	7.91908	6.3613	33.861	19.0917	14.2274	9.35049	8.32876	12.2591	18.2785	15.7385
Zfp36l3	0	0.00496876	0	0.0907838	0.637347	0.0102751	0.0066352	0.00571221	0.00969037	0.00151745
Zfp37	0	0	1.12481	0.013559	0	0.0162542	0.000523617	0.0818392	0.88343	0.638285
Zfp382	0.0306155	0.737417	0.237939	0.145603	0	0.327043	0.0722681	1.84642	0.0591043	0
Zfp384	1.82362	0.655412	1.36628	1.61591	2.13197	1.2531	1.2236	2.45924	2.07827	1.86701
Zfp385a	11.5428	6.44837	6.71132	5.252	0.030693	3.38023	4.67251	1.63596	1.12359	2.30217
Zfp385b	10.3862	6.74188	7.95397	2.80738	0.0571554	0.000952619	0.174214	0	0.064894	0
Zfp385c	0.0136051	0.00397706	0.532693	2.72814	2.64127	0.0252579	0.00551004	0.00585081	0.00857716	0.0136953
Zfp386	0.189867	0.0941909	4.52114	10.8539	9.36802	2.72278	4.53051	14.3555	5.81696	7.22388
Zfp389	3.55491	2.89848	0	1.84168	0.165231	0.0102973	0.00217222	0.00201728	3.63484	0
Zfp39	0.593601	0.0986129	0.00961591	0.83335	1.37753	0.645224	0.602425	5.21166	1.34655	0.454905
Zfp395	0.0493674	0.0356302	0.039594	0.277605	1.50892	5.84287	8.76976	10.9523	6.54934	3.51064
Zfp397	1.61165	1.52885	2.35682	3.27083	5.85689	1.6837	1.68334	3.66499	3.05354	4.06427
Zfp398	7.96762	7.40266	1.2159	2.11148	1.63764	1.4365	0.551013	2.77822	0.743803	0.0477286
Zfp40	0.90298	1.88502	2.47616	2.05399	0.361248	0.458481	0.356901	0.641305	0.677351	0.528519
Zfp407	10.4022	6.48658	10.338	14.826	5.17492	2.66132	3.70195	4.29842	5.4062	4.03833
Zfp408	2.84124	2.15991	5.19024	6.73998	2.06856	3.12688	2.53541	1.67758	5.75553	1.46606
Zfp41	2.95515	6.37956	2.58906	0.444524	0.396325	1.00502	0.535539	0.200016	0.0066311	0.456619
Zfp410	7.89497	18.248	26.9675	85.1525	71.5575	39.9416	24.8018	27.1225	34.4358	25.9014
Zfp414	13.3705	9.65944	11.8642	22.2061	40.5138	63.1435	46.9098	68.6212	66.4793	21.7293
Zfp418	0.941123	1.43279	0.266879	0.00376932	0.130893	0.268221	0.412064	1.13547	4.83485	2.23942
Zfp42	0.435073	1.25747	35.1486	60.6473	23.3244	75.2275	149.342	216.226	355.692	277.563
Zfp420	6.26592	7.56118	6.58138	4.78991	4.3934	2.57709	2.78914	4.19852	3.18448	7.87951
Zfp422	6.27021	6.30095	2.68011	1.5954	1.462	4.24671	2.40691	1.01767	1.30726	2.64055
Zfp423	3.97353	2.31279	1.89716	0.381657	0.0388572	0.0327338	0.00128636	0.000423327	0.00784679	0.0291859
Zfp426	0.00239307	0.0644476	0.372816	1.78427	4.75021	1.35602	5.61487	1.9674	3.20749	5.95176
Zfp428	0	0	0.421723	0.958784	0.131463	0.360878	0.245031	0.280602	0.15984	0.627423
Zfp429	8.87074	7.60919	11.2773	1.05466	2.94714	1.6312	1.45821	6.75136	8.56114	4.76668
Zfp433	11.8891	28.5067	109.633	228.658	176.591	114.082	120.517	53.6187	129.183	49.6682
Zfp433	5.4215	15.5339	61.8519	134.337	102.817	66.3042	67.7187	32.1437	72.6247	27.0114
Zfp438	2.26135	4.91527	2.95289	12.8617	6.04996	5.28993	4.21112	2.90522	1.60969	8.20019
Zfp442	3.06598	0.882245	1.43383	0.186641	0.516231	0.789978	0.417206	2.78633	1.08252	0.877915
Zfp444	1.04494	0.697863	2.19395	4.1856	5.13078	1.37803	0.870045	0.844165	1.19799	0.823305
Zfp445	13.8657	24.2731	21.9176	30.7396	27.3485	10.5057	14.1757	9.09312	12.938	16.67
Zfp446	0.00231117	0.121924	0.862875	5.5088	6.09647	2.58858	4.80053	3.24408	5.55878	2.17741
Zfp449	11.9838	15.7458	0.978608	2.83032	0.877212	0.0955618	0.00179697	0.0511191	0.144161	0.112741
Zfp451	34.8873	42.3563	35.9478	17.5299	16.0983	6.2268	7.83276	6.55027	4.63395	5.63259
Zfp454	0.004089	0	0	0.0233633	1.11989	0.00809624	0.359225	1.72646	0.696024	0.474949
Zfp455	0.139329	0.209646	0.148844	0.00680302	0.0407449	0.153346	0.197667	0.156235	0.28271	1.44185
Zfp456	0.965819	0.733852	1.44502	0.0169095	0.432593	0.189729	0.252094	0.625466	1.47498	1.0338
Zfp457	1.05347	0.0898953	0.256202	0.291955	0	0.142988	0.309666	0.0561972	0.0194956	1.77055
Zfp458	0.0540594	0.300995	0.233151	0.0818465	0.0136789	0.00262657	0.575283	0.408086	0.692512	0.967567
Zfp459	0.747381	0.370272	0.0264875	0.336938	1.60253	0.499449	0.716968	5.03804	10.5808	10.2476
Zfp46	14.5111	19.9555	9.20828	4.10274	5.05528	0.602903	1.11703	0.184394	0.190866	0.744499
Zfp462	0.592827	0.0268836	0.335748	0.435032	0.0298299	0.18602	0.131333	0.392532	0.494401	0.785418
Zfp467	0	0	0	0.0207184	0	0.0680683	0.0180012	0.0130826	0.018693	0.0227413
Zfp472	12.7484	4.25384	10.0154	2.91315	16.5478	7.70221	12.6938	15.6712	16.7961	15.2557
Zfp473	9.43595	6.08229	5.06766	4.34117	2.72584	0.252393	0.00129398	0.159454	0.1695	1.56668
Zfp474	1.46011	1.53623	0.660973	0.111082	0	0	0.000884749	0	0.00066676	0
Zfp488	0	0.0371977	0.0158477	0.00493395	0	0.00221317	0.0219527	0.00343123	0.00491528	0.00318882
Zfp493	0.381676	0.0698856	0.428612	0.0388313	0.333802	1.05511	1.14539	3.04245	4.13431	7.0459
Zfp498	0.0252756	1.10251	0.0437993	1.5859	3.53907	1.73001	1.33216	1.32188	1.39435	1.15255
Zfp503	0.026147	0.093049	0.347416	0.0474278	0.00410216	0.00722859	0	0	0	0
Zfp507	0.306472	0.211829	0.109151	1.1826	0.618645	1.05896	0.237184	2.23775	5.0178	3.63745
Zfp51	5.17066	17.4422	83.4479	69.7361	45.7368	32.4333	27.017	16.4021	16.7431	21.9959
Zfp511	16.5422	3.64488	1.95748	3.3969	20.8929	25.3978	25.3719	24.8383	14.6882	24.0373
Zfp512	3.77849	2.12004	0.829876	1.73959	1.21088	0.823731	1.04806	4.18768	4.3207	2.25852
Zfp513	110.865	66.0734	79.5904	50.2457	23.8622	11.7019	8.2257	5.81338	7.76881	10.5366
Zfp516	0.706357	0.0759792	0.174068	0.00320536	0	0.0476217	0.000840445	0.638798	0.486559	1.83731
Zfp518a	20.6422	23.1756	30.0663	16.6455	16.8367	5.52791	5.54951	6.48387	4.06157	5.01907
Zfp518b	0.275945	0.129918	0.962473	1.32831	5.68226	3.73337	1.9293	3.01297	5.79048	5.00843
Zfp52	0.0240269	0.0334364	2.48546	3.35188	6.4911	3.83608	3.11538	0.0114601	0.326021	0.0654891
Zfp521	1.27767	2.14138	1.38039	1.09028	0.0663792	0.0959121	0.00201319	0	0.00104664	0.0009595
Zfp523	3.97951	0.132433	0.0141304	0.285626	0	1.0266	0.000657325	0.0317518	0.0878108	0.202443
Zfp524	4.51036	0.140604	2.32201	0.757939	3.23904	8.60939	7.08854	9.66663	9.89281	12.7864
Zfp526	2.47943	2.89255	1.42915	0.190761	1.38026	0.779755	0.941757	0.913071	0.514374	0.819217
Zfp53	0.0607711	0.128656	1.27526	1.22929	5.08025	2.16266	1.03195	2.25424	4.82737	3.57687
Zfp532	6.67437	10.9012	7.9641	3.99745	0.502909	2.34264	3.50754	3.20397	5.31569	4.64111
Zfp534	3.19417	3.42315	169.945	126.159	43.9795	29.8433	30.4019	28.8354	52.4612	65.8953
Zfp536	0.619301	0.44456	0.188199	0.017239	0.00174862	0.000700361	0.000421888	0.00244362	0.000290113	0
Zfp54	0.448535	2.37694	192.606	100.038	10.5812	0.911276	1.94747	2.13392	1.67028	1.1497
Zfp541	13.0613	14.288	6.37533	4.42975	0.318103	0.016321	0.0722533	0.000438133	0.0305552	0.00603982
Zfp551	0.333511	0.216331	0	0.00561435	0	0.05054	0	0.407585	0.0370935	0.50888
Zfp553	8.18004	4.87019	23.0874	34.1141	5.39713	3.17802	1.22599	1.71488	5.57916	5.10913
Zfp558	2.51474	4.49029	5.04794	3.02931	2.35649	2.47296	3.78954	0.159664	0.63379	0.398549
Zfp560	2.78711	3.38173	13.2373	7.70092	1.02167	0.430753	0.489183	0.486293	0.385809	1.66553
Zfp563	0.546063	0.747444	0.749123	0.0453235	0.596138	0.0455172	0.686152	0.509754	2.12816	1.07512
Zfp566	0.313073	1.24199	10.8158	15.214	27.9138	20.8532	9.46323	13.3078	15.7786	21.5436
Zfp568	5.80691	5.46522	11.01	10.2252	48.8351	41.4185	37.3494	25.7206	29.097	26.4502
Zfp57	2160.28	2550.14	347.282	383.774	59.3825	22.6341	129.872	181.27	213.251	119.246
Zfp574	9.19192	7.7826	29.7498	31.771	13.055	7.2703	4.54805	3.54651	4.44513	3.409
Zfp575	0.414982	0.138747	1.10737	0.642719	0.177797	0.862524	0.835333	0.0663093	0.0631314	0.019641
Zfp579	0.225553	0	0.0141096	0.00557494	1.1755	1.24765	1.70737	2.19076	1.90228	0.2904
Zfp58	56.0848	57.5642	9.96827	5.48125	7.44338	4.71939	3.11219	2.45718	2.44029	3.9201
Zfp580	1.74672	0.957157	2.22625	0.44797	0	0.0237833	0.00537559	0.00154517	0.86958	0.00347497
Zfp583	2.00931	0.746981	0.990672	1.34684	3.04786	1.87118	1.90359	2.06362	5.39659	0.789341
Zfp59	0.115123	0.0829979	0.0688611	0.806591	5.10157	0.0886655	0.318044	3.25628	4.47619	2.37242
Zfp592	67.252	84.8274	52.551	40.1071	18.2629	7.80494	6.32104	8.39993	12.0963	8.46725
Zfp593	3.24901	1.3815	1.87816	13.5426	52.3284	24.2243	10.1656	13.0484	11.355	10.4056
Zfp595	3.43472	2.95493	1.31708	0.798047	0.664272	0.0854594	0.155223	0.281181	0.632322	1.12773
Zfp597	7.92843	9.9807	7.8268	3.15791	5.04321	4.39382	2.46291	3.65402	3.53199	1.57328
Zfp598	45.4571	29.9485	46.1868	57.6692	62.2418	29.1521	29.3283	20.8735	21.9913	23.8438
Zfp599	0	0.534181	114.475	99.6554	14.0009	33.1984	22.5061	10.9169	19.3847	7.35328
Zfp60	56.2346	66.5923	11.4092	7.89396	3.64353	2.91105	3.70999	5.98358	7.48166	2.95138
Zfp600	11.1044	17.4024	53.366	68.8018	47.8575	24.2715	33.1593	22.8284	33.8958	26.5884
Zfp605	2.85886	4.11195	5.61819	6.37364	1.51266	2.12	4.6799	2.12773	2.92534	1.96077
Zfp606	1.12119	1.97755	3.02467	0.0556286	1.84407	1.06895	0.172852	1.00993	2.99769	1.61296
Zfp607	0.39514	0.4912	0.797274	0.304953	0.672139	0.117291	0.027641	0.0356358	0.244836	0.050523
Zfp608	0	0.0309976	0.0283753	0.0973202	0.00238368	0.32841	0.00586716	0.0158689	0.236197	0.164174
Zfp609	3.0895	3.86435	3.36984	4.91025	2.37983	4.85501	2.86504	2.40913	2.30078	4.84002
Zfp61	15.0276	11.7398	1.95126	4.47897	2.57463	3.30577	3.15889	4.06829	4.61961	1.66477
Zfp612	15.9414	13.6241	2.09668	1.55182	2.05531	2.45552	2.53909	1.13542	1.44964	0.583583
Zfp616	34.9281	44.988	16.0381	6.91438	1.0461	0.178994	0.195264	0.126965	0.197932	0.000922114
Zfp617	2.6839	4.66794	10.7781	92.5729	39.9585	28.0466	22.5687	48.9415	32.5823	25.3922
Zfp618	0.36148	1.21037	0.269146	0.205946	1.59177	0.278415	0.000811822	0.00749276	0.0304316	0.0103599
Zfp619	0	1.49061	0.256008	0.00516878	0.881079	0.0473777	0.0228652	0.0418548	0.0158197	0.00271611
Zfp62	6.22261	5.22662	8.84488	6.83606	5.46676	1.45614	0.923809	6.51995	4.99885	2.90632
Zfp622	0	0.761491	216.787	299.835	244.215	67.2615	46.2147	15.9271	13.9049	13.2139
Zfp623	4.01465	1.72864	11.332	39.4462	25.7928	5.25176	4.88709	2.52728	4.52357	3.89285
Zfp628	2.45239	1.90856	3.85704	2.36753	1.31028	0.468996	2.02456	0.0923372	0.776	0.616736
Zfp629	0	0	0.00175283	0.0261859	0.457708	0.248447	0.0323118	0.151176	0.000941592	0.0932803
Zfp637	0	0.993253	16.7532	21.8769	29.0565	35.6653	51.1554	51.0959	29.1057	35.0363
Zfp639	12.3217	11.2645	29.5998	120.995	107.679	10.1262	9.48846	12.2524	15.9824	9.29005
Zfp64	3.04985	2.0783	0.0512412	0.272559	0.647647	3.20499	6.2723	12.2217	16.5924	12.7889
Zfp641	0	0.00283905	0	0.00257034	0.00141937	0.000559327	0	0.000744332	0.000531408	0
Zfp644	3.62124	5.70731	25.6273	35.9775	72.5194	6.432	6.1575	1.98153	2.66268	2.41659
Zfp646	2.05678	4.57431	2.26986	6.03976	10.7861	1.50075	3.28772	3.54392	4.99467	2.49747
Zfp647	0	0	0.342105	9.47669	3.4161	0.106314	0.379213	0.486601	0.367232	0.444834
Zfp648	0	0	0	0.00134236	0	0	0	0	0	0
Zfp651	0	0.0300224	0.0495798	0.0354256	0	0	0.000294419	0.00032711	0.00864124	0.000650933
Zfp652	18.0836	20.4022	5.98914	5.85331	3.82474	1.10257	0.673967	4.76404	3.86343	4.39039
Zfp653	19.1886	5.62766	0.248493	4.04573	5.24169	4.10872	3.96545	2.8416	2.82499	1.43321
Zfp654	15.5554	25.0363	50.1173	53.2141	29.5855	6.61531	6.26407	7.93183	8.84891	6.22202
Zfp655	120.79	139.616	89.954	99.6506	79.2323	59.4561	65.8937	56.9753	59.9244	30.4426
Zfp658	0.0023424	0.0041498	0.0329564	0.684057	2.28639	0.82882	1.20158	3.37701	1.03866	1.39948
Zfp661	0.038016	1.50969	0.0184366	0.00633611	0	0.319596	0.0545711	0.462677	0.415277	0.421592
Zfp663	0.731077	0.881316	0.013617	0.0791557	0.227659	0.000678243	0.00112579	0	0	0.00249559
Zfp664	120.969	78.6372	159.903	106.798	26.6521	8.48162	7.35403	8.96292	8.47347	8.41491
Zfp667	12.7792	16.9348	21.6544	14.8104	3.24239	0.215894	1.60635	1.98796	5.86514	5.18946
Zfp668	0.193122	0.106793	1.0187	2.56131	8.69255	2.09552	1.23377	1.12716	2.12407	3.64823
Zfp672	4.74898	4.35553	8.47567	21.9146	31.932	17.2628	20.5504	12.3823	13.2395	15.545
Zfp677	0.0769561	0.374148	7.7347	7.86563	4.18751	0.589351	0	0	0.280587	0.739024
Zfp68	1.19031	1.30254	4.13986	7.68872	4.183	1.98835	2.70812	1.83655	2.70715	3.58733
Zfp687	16.2202	13.482	5.43775	4.48783	1.52679	1.37377	0.66043	4.66807	2.66534	1.25926
Zfp688	0.230228	0.129277	0.0319077	0.0805494	0.0201154	0.522979	1.04869	2.75738	4.08424	1.06578
Zfp689	1.03409	0.49907	4.73475	3.9539	0.0785264	0.754139	0.185797	2.09977	1.63301	0.659026
Zfp69	30.3284	24.4698	12.3584	8.04481	0.703299	0.209111	0.780409	1.39144	0.439676	0
Zfp691	3.21959	2.44394	2.69956	0.0450659	2.92911	4.22369	10.6382	10.4518	3.74485	7.0377
Zfp692	14.6846	6.06686	1.07191	0.106667	4.2	5.0005	4.98857	12.1019	10.937	6.72743
Zfp697	0	0	0.00590554	0.277043	0.998878	0.0255553	0.000288231	0.0765208	1.20816	0.185507
Zfp7	0.304856	0.171319	6.68884	28.7557	45.4916	12.517	13.9378	11.2325	19.2869	13.864
Zfp703	13.9294	11.4134	56.8179	16.0074	3.41782	0.104513	2.1303	0.910891	1.91432	3.57878
Zfp704	1.57273	1.24647	1.12126	0.795599	1.47094	1.33399	1.08917	7.33321	6.60572	7.43596
Zfp706	103.316	100.395	172.162	121.209	63.2714	142.906	155.775	101.009	86.4729	96.181
Zfp707	3.18871	3.6138	440.779	602.708	176.604	36.1516	22.0778	17.9315	9.9083	5.51163
Zfp708	2.22829	1.0442	2.8835	11.1347	3.60551	4.28622	4.1204	8.94271	5.68525	2.21297
Zfp709	8.49542	11.3282	7.52579	4.64222	2.73349	0.21215	0.350149	0.962086	2.76457	1.85696
Zfp710	0.301059	0.0152706	5.79333	23.039	14.096	10.5189	6.73431	9.40117	10.576	6.44154
Zfp711	0	0.0956731	0.004958	0.020697	0	0.00071352	0.00155386	0.000388264	0	0.00158271
Zfp712	0.331895	0.0539634	0.00766114	0.0673325	1.85504	0.0970082	0.256819	2.86892	0.430833	0.318587
Zfp715	1.38031	0.478148	1.69149	2.90469	5.05803	2.32597	1.36606	5.96157	4.72461	2.93958
Zfp719	0.0261359	0.120341	0.125008	0.0291944	0.847228	1.21429	0.446457	1.82109	4.21022	1.61584
Zfp71-rs1	1.32816	2.05292	2.16601	1.48575	2.01606	1.69464	0.876875	2.17075	2.87777	3.34447
Zfp72	0	0.0155913	0	0.0164506	0	1.0798	1.15783	4.95431	4.06518	2.47361
Zfp735	29.9219	50.1918	15.1972	1.13353	0.495227	0.318589	0.00255753	0.00347288	0.108001	0
Zfp738	16.8334	28.5489	34.1409	14.9189	6.90754	0.470416	0.419459	1.50932	3.82087	1.04534
Zfp74	9.13564	11.838	7.63369	7.38352	2.14483	1.65848	0.89162	4.27075	2.66118	4.99211
Zfp740	3.27176	3.18161	2.45436	2.85006	20.4943	17.6471	12.3408	3.6521	15.2637	7.44315
Zfp746	7.39419	5.11696	2.69916	9.72898	7.25171	2.6004	3.07717	4.06335	8.18345	4.47221
Zfp747	0.605761	0.0765854	0.0630741	0.0994367	0.591488	0.850458	4.74789	2.34977	7.8563	3.45352
Zfp748	1.9619	1.50406	1.9629	2.48292	10.0189	12.0335	8.07554	16.2775	12.615	7.59594
Zfp750	92.1366	86.3957	14.01	6.59117	0.280941	0.300216	0.700639	0.12307	0.489178	0.0216323
Zfp758	2.0669	5.41617	8.4443	2.83674	13.4235	1.86318	1.92199	3.85821	2.24122	2.95339
Zfp759	2.01484	4.3649	5.53547	1.56535	1.29381	1.14972	1.30077	1.07654	2.64862	1.42529
Zfp760	3.26427	3.1432	14.5968	6.88045	3.21702	0.372272	0.20106	3.84227	1.1939	0.871519
Zfp763	0.350075	0.425221	0.547955	0.334435	2.40408	2.68589	1.0493	2.78718	3.0568	0.471546
Zfp764	0.702385	0.0783304	0	0.0225031	0.189061	0.243106	0.246413	1.21308	1.35808	0.972153
Zfp768	0.159846	0.360865	0.26202	0.187916	1.24282	0.0412967	0.242111	0.434858	0.930449	0.0449094
Zfp770	10.7731	19.3922	28.4668	13.6432	10.7036	2.27505	3.93376	1.70053	2.69603	3.83178
Zfp771	0	0.00440421	0.414923	0.336453	0.415912	0.0264295	0.106191	0.0721651	0.124898	0.013975
Zfp772	0.697419	1.03675	1.59314	2.93657	5.17278	6.71492	7.08454	3.79729	9.3391	3.21796
Zfp773	0.139755	0.0029185	0.00902652	0.00351841	0.0349191	0.0592431	0.000808383	0	1.05911	0.0109931
Zfp775	0.760802	2.18511	42.7361	89.9932	37.8099	6.0512	4.50044	1.1758	2.58637	0.659361
Zfp777	2.5989	1.33551	4.61253	8.55092	8.57849	3.45803	6.94255	2.09431	7.29875	3.17767
Zfp78	3.50844	3.72443	0.824376	3.16154	1.70106	2.23762	1.25269	1.90618	1.63074	0.373143
Zfp780b	0.151623	0.415832	0.977628	6.91255	3.5837	0.951892	1.66183	5.21379	3.34703	2.00879
Zfp781	11.1287	8.51034	202.183	153.337	120.654	24.9009	21.6929	18.6629	62.0384	33.3749
Zfp781	26.0453	19.5519	419.803	295.364	237.56	55.0983	48.2208	40.4593	116.233	70.2798
Zfp783	0	0.0143551	0.0338108	0.858038	1.55269	0.51689	0.112658	0.141367	0.101172	0.165893
Zfp784	26.2933	47.4863	13.8063	9.37093	32.5252	19.8954	0.0138964	0.152672	8.34367	0.0601496
Zfp786	0.178936	0.205407	0.435167	0.0031228	0	0.000812791	0.134232	0.0880354	0.531512	0.0803114
Zfp787	0.941665	0.640211	0.376337	0.0896075	1.72217	0.369388	0.00964228	0.733262	0.29915	1.67985
Zfp788	1.72207	2.55208	2.26662	0.595413	3.45035	2.65925	2.33122	3.66595	3.29599	1.48928
Zfp790	1.36932	1.51999	2.31363	3.14059	2.75648	3.2665	3.08848	2.66334	6.25851	1.31004
Zfp791	12.1054	5.63787	87.8006	81.4098	19.2768	7.34223	9.5437	8.62579	0.986616	0.879871
Zfp799	0.00901013	0	0.00258593	0.0156589	0.00155016	0.0866099	0.00340131	0.204311	0.35717	0.113389
Zfp800	0.862758	0.629728	3.55546	6.12332	13.6314	7.32372	10.5866	11.5293	7.30661	8.99439
Zfp804a	0	0	0	0.00520767	0	0	0.00199499	0.000927473	0.000300586	0.000693284
Zfp804b	0.499116	0.794374	1.37621	0.276151	0.310618	0	0	0	0.00158008	0.00204932
Zfp808	4.3057	5.57193	17.9885	11.6979	11.9174	11.1571	8.93831	45.1659	47.6254	42.9592
Zfp809	5.45526	7.84015	130.518	89.0464	42.6226	27.0573	25.0674	20.147	36.8915	20.2724
Zfp81	1.88609	1.02438	3.47838	7.40077	8.11318	5.58326	3.75893	7.68584	4.60768	1.75253
Zfp810	0.030223	0.18808	2.94745	4.36704	1.80322	0.659702	0.582076	1.71169	2.71248	2.14594
Zfp811	0	0	0.00490216	0.00992953	0	0	0.00164415	0.000772947	1.17299	0
Zfp819	24.5853	40.5523	31.2638	10.7042	13.5294	0.498587	1.42478	4.32142	9.78944	8.14948
Zfp82	7.67568	12.9697	5.29799	14.0788	9.69695	3.01696	1.7054	2.67799	4.20342	3.31202
Zfp820	12.063	14.7182	31.4732	33.4444	70.174	87.5292	99.8735	10.476	13.5248	2.48327
Zfp821	30.0815	26.943	70.2185	101.867	96.942	50.9237	57.5729	4.2202	15.0876	8.48952
Zfp825	2.31925	2.48252	1.15955	1.69455	5.71182	27.2973	19.3625	33.8359	40.123	19.3088
Zfp827	0	0.00361547	0.00171973	0.0102025	0.00325727	0.030385	0.00132124	0.0215298	0.000434228	0.000380901
Zfp828	84.0858	72.5814	7.92249	35.8365	37.8459	30.4595	21.7939	18.8835	18.0337	14.4798
Zfp830	31.5884	21.9487	27.0344	48.2497	25.6803	14.6123	16.4118	10.2436	16.665	14.7881
Zfp831	0	0.0147358	0	0.304324	0.000699632	0.0352832	0	0	0.000888083	0.000583465
Zfp839	8.54956	14.0886	3.10164	2.44706	4.88239	2.62087	0.901535	1.90199	5.25444	1.49952
Zfp84	18.3022	17.7596	13.3047	7.07842	3.11846	4.80802	6.92513	3.6436	3.94077	2.65192
Zfp846	7.76637	10.9221	5.71641	4.09577	4.77409	2.64176	3.15477	3.36834	4.11274	2.44593
Zfp85-rs1	1.21226	0.78594	2.24918	0.526463	1.93108	0.504416	0.0472334	2.46447	1.96451	5.34747
Zfp862	0	0	0	0.00557315	0.0267156	0.817229	0.373887	0.3271	0.713234	0.157229
Zfp865	0.991551	0.595375	0.202901	0.21735	2.34927	3.51696	1.41063	4.69802	2.21434	5.0774
Zfp866	9.73044	6.07233	1.20759	1.85316	2.72488	0.61395	1.6351	2.25663	4.57724	1.21757
Zfp867	0.00231547	0.268618	9.10542	2.49563	0.566176	0.558816	0.473649	1.00954	3.44919	0.0201659
Zfp868	0.823878	1.16303	20.2813	26.6023	14.4683	7.68965	9.36007	13.5007	17.169	10.126
Zfp869	1.58158	3.44087	7.87199	14.0234	16.3623	10.8346	17.1089	13.2101	20.0334	9.55683
Zfp87	0.333367	0.16729	1.87556	3.8547	4.98472	3.46974	2.11657	5.45135	7.11342	4.9583
Zfp870	0.809061	2.20226	1.11101	0.0507189	0.0208062	0.610228	1.70659	1.46772	5.42415	1.54781
Zfp871	0	0.000963579	1.97823	1.95798	2.05001	1.80977	2.30809	3.90116	4.84026	2.60247
Zfp872	0.00267772	0.317547	0	0.000850657	0.0590043	0.24291	0.506164	0.179531	0.421341	0.240374
Zfp873	17.2976	25.1558	1.84523	7.89524	4.53941	1.93859	4.81742	1.76882	2.50231	3.87334
Zfp874a	0.120341	0.281545	1.40924	1.69992	15.5172	3.8194	3.70727	6.55065	10.7022	5.41333
Zfp874b	0.0155502	0.180084	3.33047	5.1955	18.0303	1.25882	2.78537	4.68703	3.36768	6.7541
Zfp879	0.602772	0.757447	0	0.00300469	0	0	0.609464	0.549014	0.00220121	0.0032702
Zfp882	0.0111494	0.0794164	0.678001	0.702806	0.154439	0.45022	0.573743	0.611094	0.397575	0.500415
Zfp9	0.00651068	0	0.418665	1.72829	0.0123677	0.546047	1.61197	0.409471	0.653327	0.181162
Zfp90	7.46291	3.2512	1.01489	0.355702	0	0.114399	2.47687	0.647586	0.0216061	0.425858
Zfp91	30.7587	49.6414	54.9036	37.2703	27.297	26.3311	17.7493	16.9268	24.2901	17.7428
Zfp92	5.26294	6.74337	2.09282	0.650468	0.926652	0.00144848	0.109568	0	0.0117932	0
Zfp93	3.43928	3.85987	0.867128	1.71832	0.466406	0.0442349	0.373445	0.227739	1.80553	0.82246
Zfp930	2.37645	2.81986	0.942618	5.54873	3.38308	9.93064	11.558	9.62747	18.491	9.95713
Zfp931	2.16498	1.17374	2.81284	0.655481	0.347117	0.854719	0.750194	1.97818	6.40383	2.30764
Zfp932	42.5667	50.6935	40.8295	8.81718	45.1354	132.632	133.727	35.3635	55.5454	35.2337
Zfp933	0.453494	1.68396	0.0439413	0.239468	0.316323	1.25893	1.02884	5.74966	2.98031	2.80875
Zfp934	4.22956	6.07636	15.2743	11.0824	16.2011	8.96566	16.7908	51.2728	60.5001	85.6311
Zfp935	3.15175	2.5404	23.1207	30.1016	19.5633	8.8008	12.0992	14.6928	17.1164	10.6725
Zfp936	10.3008	11.1365	92.3925	159.462	119.889	41.5978	36.6714	26.4569	37.77	15.7051
Zfp937	1.04735	0.714029	1.66204	0.62582	0.488037	0.978374	0.135197	0.509482	1.53469	2.33113
Zfp938	2.16442	0.00265218	0	0.0392169	1.51565	0.611597	1.09144	4.29872	5.14323	2.72441
Zfp939	24.7923	17.7	59.805	73.9475	25.1888	15.9678	12.1808	2.87484	3.67292	1.52908
Zfp94	4.21963	3.68365	0.59607	1.70546	2.25684	0.424982	2.62735	0.977498	1.78109	0.736412
Zfp940	2.47623	3.35713	4.76598	1.94504	0.00318465	0.721954	0.827887	5.05221	0.586945	0.97563
Zfp941	0	0.0191759	1.55488	0.528227	0.0305565	0.218842	0.015992	0.253566	1.6414	0.109266
Zfp942	13.5285	17.1798	26.5498	22.8623	13.9575	10.2384	15.4964	9.43527	7.32747	5.8671
Zfp943	6.76981	9.92439	9.15059	2.25532	2.68821	0.756102	1.6281	1.89778	5.31975	2.6956
Zfp944	9.97143	17.631	29.2725	19.0566	8.31987	4.76572	5.36437	5.17994	4.53058	9.34715
Zfp945	0.0285282	0.0472511	0.112714	0.0368194	0.0194409	0.163328	0.0240666	0.0131131	0.0260562	0.0320827
Zfp946	1.82806	3.19318	5.68789	0.150296	0.559601	0.442921	0.141182	1.24315	3.17781	0.522754
Zfp947	3.12887	2.45872	1.9128	30.602	25.9308	19.1908	21.7509	19.7799	6.01841	10.0925
Zfp948	0.131977	2.01282	30.1568	18.7092	29.1152	6.0657	1.72226	0.210601	0.57232	3.21604
Zfp949	1.62379	1.13903	31.4243	25.9538	21.7424	7.3066	8.71078	6.90343	11.3782	5.85552
Zfp951	26.623	36.239	27.214	52.1793	22.8673	21.2566	34.2281	13.1053	23.6724	19.3733
Zfp952	31.7059	37.068	2.15408	3.51827	5.69873	1.224	1.56114	1.68968	5.49832	2.48435
Zfp953	0.9005	0.352242	0.186925	0.522138	1.23975	1.16084	0.466358	0.733523	2.31956	0.986359
Zfp954	0.0652942	0.968568	103.073	149.692	29.6968	20.9807	23.3097	10.9522	13.2676	20.7781
Zfp955a	39.7661	42.7695	6.72595	9.7444	16.3002	7.07859	8.70722	16.5831	11.3446	11.2486
Zfp955b	106.016	123.02	17.363	23.3002	23.7942	17.0869	19.9088	23.3761	25.3196	10.8395
Zfp956	24.6217	21.8007	6.07767	10.1677	17.7402	4.44814	3.37923	4.60449	5.00399	3.4388
Zfp957	91.9535	102.571	58.7429	37.4617	5.72594	0.809912	3.74793	0.0104333	0.212329	0.00971325
Zfp958	7.25132	14.5595	16.677	58.3041	23.9778	29.1795	16.0196	21.3999	29.1408	28.4073
Zfp959	1.58373	1.2212	0.366848	0.581559	3.55403	1.98453	1.69767	3.3281	1.65425	1.70819
Zfp960	28.3024	31.5069	123.867	109.132	195.223	210.473	191.479	101.039	114.83	50.0285
Zfp961	5.59643	6.04814	35.158	66.472	40.3656	18.9499	26.2847	47.2207	28.1011	45.1452
Zfp963	9.52343	11.5437	1.6058	0.270238	0.738124	0.474658	1.14912	0.803511	1.66816	1.50383
Zfp964	0.245815	0.382913	0.0210951	0.0174364	0	0	0.00426255	0.00104231	0.00164264	0
Zfp97	15.9818	18.8299	82.5755	68.7167	128.053	135.218	112.213	61.6211	76.619	30.9387
Zfpl1	6.22362	2.43852	1.10962	4.83833	7.311	13.8735	32.2822	20.4241	21.9975	17.7271
Zfpm1	0.364691	0.416983	0.129887	0.243705	0.0108335	0.174187	0.284346	0.103064	0.115468	0.465645
Zfpm2	0.217982	0.386006	0.00866043	0.00726056	0	0.00073124	0	0.000779366	0.00121956	0.00111902
Zfr	143.809	142.478	134.762	81.753	31.3773	21.3132	38.2311	37.4972	35.3278	34.8528
Zfr2	0.195811	0.0917054	0	0.0622561	0.422848	0	0.00296681	0	0	0
Zfx	0.183289	0.248719	14.6134	23.7019	24.1467	12.9053	8.86643	8.99612	8.41432	8.42064
Zfy1	0	0.0129904	9.18012	1.65104	0.0940282	0.0322042	0.163514	0.497022	1.38979	0.295673
Zfy2	0	0.275042	13.5517	0.352274	1.76046	0.60843	0	0.385546	0.903654	0.0772347
Zfyve1	1.00824	1.41385	2.32071	3.44723	5.34025	12.2866	13.2133	12.5458	18.3768	4.77851
Zfyve16	9.17004	9.17811	1.08128	1.72994	2.67154	1.42921	2.94316	6.19168	3.20934	2.74364
Zfyve19	5.45573	6.97632	3.72783	2.02994	5.09164	6.7249	12.398	31.5235	31.3312	17.9876
Zfyve20	6.60644	7.24902	41.0088	102.914	44.6424	14.5462	11.6365	5.94303	6.59602	6.58752
Zfyve21	222.223	151.252	62.0139	17.1064	2.52539	10.7711	16.7499	52.5468	32.4913	52.2264
Zfyve26	7.20292	10.9111	13.1354	5.81842	5.56777	12.3109	9.50131	7.56857	14.9448	7.07073
Zfyve27	0.0413403	0.0437436	1.23021	5.52091	15.8308	7.82252	5.25624	1.94295	6.74148	1.89209
Zfyve28	0.587969	0.760747	0.419142	0.0492627	0	0.126036	0.0405301	0.00141954	0.0834721	0.000831848
Zfyve9	4.64216	8.53761	12.4985	9.71937	3.95249	2.46414	2.15678	2.58832	2.19473	0.645408
Zhx1	1.10253	1.15813	0.947553	0.050233	0.242447	0.774725	0.00781536	0	1.05866	0.0218941
Zhx2	0	0	0.00755747	0.00590055	0	0.0193412	0	0.00135546	0.00133741	0.00197112
Zhx3	12.5866	8.80668	16.6561	11.2134	5.32652	0.987074	0.854029	0.483324	1.05665	1.16811
Zic1	0.00605945	0.0157824	0.0104262	0.00413513	0.00564871	0.000938199	0.00367022	0.00159976	0.00274799	0.0484217
Zic2	0.223555	0.0244858	0.00833797	0.111847	0	0	0.00092386	0.0140798	0.00851737	0.284733
Zic3	0.0358821	0.00818993	5.60546	1.32996	0.0580453	0.0088601	0.00194358	0.00117677	0.00324678	0.706321
Zic4	0	0	0	0.00344009	0	0.000462195	0.00157452	0.00223999	0.00249826	0.00192226
Zic5	0	0	0	0.0572732	0	0	0.000830342	0.688385	0.344721	0.194864
Zik1	1.63868	1.61266	0.881284	0.167658	0	0.552859	0.143498	0.204592	0.639124	1.43787
Zim1	0.360487	1.82027	0.992458	0.77709	0	0	0.00238259	0.50626	0.00188636	0
Zim3	0.164016	0.279567	0.419529	0.057359	1.14379	0	0	0.598444	0.316217	0
Zkscan1	4.63659	6.62134	7.37788	17.7051	17.8611	3.00518	1.59545	4.10557	3.63553	2.79127
Zkscan14	27.4139	17.1129	13.1037	42.9132	34.0317	14.1523	11.0764	2.79903	5.52605	2.46692
Zkscan16	2.39546	0.241644	0.35838	0.000630315	0	0	0	0.000999045	0.00372498	0
Zkscan17	12.858	17.8959	10.4841	7.46203	7.55511	4.1631	0.862024	6.25131	9.06951	10.3857
Zkscan2	0	0	0.0033345	0.00122388	0	0.000784723	0.000508692	0	0	0.0026573
Zkscan3	0	0.00242407	0	3.33878	5.46744	1.38405	0.392393	1.11057	8.43452	3.37286
Zkscan4	0	0	1.19159	2.13509	3.9395	0.0519043	0.00588427	0.0118098	0.100181	0.00851696
Zkscan5	28.0872	24.4806	17.3562	15.1902	8.90663	4.21153	5.3724	3.85256	7.71238	3.64163
Zkscan6	39.8793	57.4685	16.043	7.67855	10.7413	6.7664	6.21952	3.07597	7.73653	2.32935
Zmat1	0.427701	1.09683	0.171959	0.248471	0.00205561	0.0813743	0.109702	0	0.00427453	0
Zmat2	122.897	75.7302	65.6826	76.9387	57.9159	59.813	73.5095	87.0749	88.7126	86.849
Zmat3	0.353872	0.265862	0.487544	0.103748	1.24605	4.15962	1.32455	0.537906	0.717131	1.20421
Zmat4	24.0826	21.9166	7.97908	3.68114	1.42004	0.00639215	0.130894	0	0.055286	0.00922864
Zmat5	7.08089	1.24033	42.8585	67.154	59.4448	210.42	212.813	206.673	111.574	99.8972
Zmiz1	5.7866	7.70923	4.53007	28.6167	39.9539	31.4826	25.9843	33.3552	51.3952	40.3198
Zmiz2	39.8049	39.0564	36.5263	24.3356	14.5817	24.4979	23.4584	17.0296	27.4946	18.0585
Zmpste24	17.2561	18.9844	27.2299	107.135	202.522	280.961	352.67	99.2552	85.49	39.4924
Zmym1	31.2835	26.445	67.7474	82.0707	40.2472	24.6703	38.0661	35.7389	55.199	28.0399
Zmym2	9.20226	10.9731	16.0944	22.1323	20.9588	7.82938	6.17052	10.343	11.3953	7.84418
Zmym3	7.03388	12.3001	9.28999	6.25126	16.6359	17.8564	13.003	6.75986	15.9101	5.53698
Zmym4	15.7849	15.0336	9.25016	10.6532	6.3103	7.21009	4.37306	6.49825	9.10481	5.59556
Zmym5	0.8079	0.941943	9.13038	4.57239	7.40678	4.19455	5.41658	9.73677	9.94801	6.67715
Zmym6	5.14934	6.8377	3.8046	2.80899	1.71044	1.10421	0.9907	8.12447	10.6427	5.08664
Zmynd10	4.97144	5.00041	0.89612	0.122055	0	0.407207	9.09745	0	0.102298	0.101974
Zmynd11	0.910448	2.96912	1.91394	0.825177	0.574073	3.12902	1.52954	0.841662	2.32248	0.201933
Zmynd12	0.062105	0.0924616	0.0573327	0.221995	0.0549556	0.0110601	0.0657454	0.098637	0.215772	0.00288836
Zmynd15	0	0.0213129	0.847461	0.406343	0.00334985	0.00146879	0	0.0026426	0.00328421	0.00260159
Zmynd17	0.00434055	0.0213797	0.156517	0.357992	0.0424307	0.0312084	0	0.0687016	0.709965	1.83734
Zmynd19	111.129	70.4154	217.099	187.76	120.815	41.9026	33.0276	8.93926	9.13817	14.8985
Zmynd8	9.78164	10.7024	8.4965	12.4705	16.6866	9.06284	6.22872	8.05378	10.0484	12.8659
Znf512b	10.9796	17.1926	8.15412	4.74286	7.92559	4.9009	1.27426	3.89739	5.11726	2.22592
Znfx1	75.3174	84.0684	27.1203	7.60699	2.94395	1.44634	2.93819	1.97194	3.21123	0.626949
Znhit1	4.99387	1.78988	0.703794	6.38243	80.8852	107.823	114.732	72.4118	55.6031	49.084
Znhit2-ps	4.82688	0.561059	41.6554	66.8615	20.2401	4.3286	2.82523	2.60396	2.96074	2.83222
Znhit3	6.02554	6.53522	946.472	1415.47	1272.28	560.169	474.919	391.599	241.711	267.943
Znhit6	26.3054	12.8505	80.192	112.29	132.458	46.7881	33.9184	35.9892	38.7042	27.6575
Znrd1	20.7694	16.9417	227.29	326.766	232.408	264.373	199.404	220.745	175.138	172.771
Znrd1as	13.7329	10.8794	2.70256	9.10641	7.64586	15.1006	11.2255	22.726	20.2996	28.3084
Znrf1	2.40941	1.83708	2.35676	3.696	13.4139	7.92587	8.49017	2.05005	3.69172	2.46886
Znrf2	59.8751	37.0595	31.4984	55.2718	50.4538	30.6353	35.0262	34.2721	45.1701	40.6859
Znrf3	2.38218	2.70943	3.96295	7.23012	10.7739	3.07073	3.10784	4.76084	3.4654	2.96697
Znrf4	0	0	0	0	0	0	0	0	0.00135613	0
Zranb1	76.3084	85.3544	121.976	85.0248	35.9172	13.8963	18.9307	10.4279	11.2519	12.5314
Zranb2	30.2194	29.6108	30.0233	23.8428	64.1805	78.0864	77.1258	57.4503	56.5531	60.6103
Zranb3	7.71197	7.65652	2.39875	6.95731	2.48596	2.6289	1.78649	11.6413	9.06937	8.10761
Zrsr1	4.01978	2.91141	25.7923	15.0972	3.83232	1.49657	1.29649	2.53985	3.52907	0.425811
Zrsr2	4.19079	2.2747	4.84377	7.21584	10.6182	3.63963	3.25235	14.3876	5.92869	5.18754
Zscan10	0.526381	0.333409	17.0168	39.2519	65.8581	15.2033	3.31435	8.24582	14.5065	17.178
Zscan12	2.44172	2.74041	1.49868	1.58628	2.18116	0.422763	1.18822	5.93842	3.53802	4.84029
Zscan18	2.43852	1.32444	1.12352	0.0178094	0.516588	2.10027	2.19633	2.66833	2.28946	3.1209
Zscan2	1.0245	0.134893	0	0.00330488	0.150944	0.0200382	0	0.017365	0.111697	0.00116385
Zscan20	4.26672	7.14866	1.273	1.94948	3.61824	0.124081	0.759142	0.693905	1.56261	0.157824
Zscan21	19.6307	23.4678	23.826	52.9017	47.9957	23.2804	23.1181	27.3215	36.3128	14.0933
Zscan22	0.0401786	0.264872	0	0.269418	7.30713	1.8704	0.952644	9.14364	2.24119	1.31425
Zscan29	2.31855	2.63735	5.39671	8.45111	5.23738	2.63497	1.73195	1.05444	1.17865	2.77539
Zscan30	0.0240256	0	0.235567	0.00581663	0	0.0471194	0.00951729	0.0113559	0	1.96036
Zscan4a	0	0.425704	69.5907	40.597	2.65413	0.0357198	0.00369697	0	0	0
Zscan4b	0.0688449	5.13687	456.414	175.997	13.2062	0.231451	0.0390547	0	0	0
Zscan4c	0	5.06786	484.03	266.89	9.86808	0.368271	0.0237893	0.00878778	0.00448439	0
Zscan4d	0.00799402	4.24937	162.287	97.2412	2.29241	0.120489	0.00900854	0	0	0.00793114
Zscan4e	0	4.1731	288.821	126.161	11.3366	0.58929	0.0304472	0.020649	0	0
Zscan4f	0	18.1887	2100.84	1003.01	41.0077	0.869456	0.059234	0	0	0
Zscan5b	4.94679	9.64236	420.423	752.776	248.468	37.2061	31.4869	3.71809	3.25567	0.033119
Zswim1	1.05205	3.25417	60.7133	40.8961	41.2692	21.7386	26.8571	26.1387	47.2286	26.9367
Zswim2	0	0.0366002	2.50844	7.08094	1.93065	0.00596262	0	0	0.00249472	0
Zswim3	184.605	118.497	64.1384	139.805	45.8558	17.8977	13.1117	9.88036	12.2255	9.33638
Zswim4	12.4207	20.1257	17.876	21.6412	9.50568	4.61787	2.84563	1.75941	1.9804	1.53631
Zswim5	2.51127	6.39383	2.0554	0.487319	0.56017	0.891404	1.30385	0.75665	0.540213	0.941859
Zswim6	2.34375	0.979706	2.92621	1.25085	5.35332	0.435133	1.1855	0.282663	0.474915	0.972213
Zswim7	17.2284	10.1955	4.07575	4.07285	1.81656	4.88677	6.53235	51.3667	48.2261	16.6383
Zufsp	36.0178	38.7657	4.52676	4.569	6.13475	16.6995	19.851	15.4664	28.7127	14.0815
Zxda	0.200197	0.0444364	0.346175	0.00889336	0.00180443	0.0590082	0.00156458	0.00339242	0.0217931	0.0284967
Zxdb	1.3103	1.15381	0.573933	1.50733	1.47895	0.135105	0.714244	0.00301647	0.196713	0.0645028
Zxdc	10.8814	8.53771	3.16186	1.89295	2.27956	2.06014	3.97209	4.07806	7.72388	4.23433
Zzef1	1.32319	1.04506	3.14231	7.89588	6.65057	5.4951	4.83245	4.02817	8.52554	6.17674
Zzz3	8.04765	14.3549	23.8482	35.4646	22.1049	21.7065	19.0644	8.20909	10.7906	10.5426
