# Supplementary material for: ZFP560 facilitates KAP1-dependent chromatin repression to regulate exit from totipotency
Source: Research Square preprint supplement (doi:10.21203/rs.3.rs-7290036/v1), 2025-08-25
Supplement: Supplementary file 8 [file b33db0b32db8938a0c485da1.xlsx]

## Sheet: OE RNA-seq
Gene ID	Normalized read count OE_Control_1	Normalized read count OE_Control_2	Normalized read count OE_Zfp560_1	Normalized read count OE_Zfp560_2
108167871	0	0	85.9071	67.2384
100861880	0	0	164.655	209.865
670832	0	0.993412	76.7028	94.7451
115489397	0	0	2.04541	1.01876
666574	0	0	2.04541	1.01876
100043231	0	0	20.4541	0
101055915	1.96954	0	38.8628	49.9194
666501	0.984772	0	22.4995	20.3753
666738	0.984772	0	22.4995	20.3753
434377	49.2386	41.7233	3848.44	3905.94
74307	0	0	2.04541	0
115487466	0	0	2.04541	0
100042503	0	0	4.09082	0
102640707	2.95432	0	26.5903	23.4316
100043188	10.8325	2.98024	107.384	123.27
74129	3.93909	5.96047	77.7255	85.5762
434729	0	1.98682	5.11352	13.2439
108168387	4.92386	3.97365	54.2033	66.2197
626943	4.92386	1.98682	39.8855	35.6567
22361	0.984772	3.97365	33.7492	29.5442
20680	3.93909	5.96047	65.4531	60.1071
245423	17.7259	20.8617	239.313	229.222
212448	11.8173	19.8682	197.382	193.565
17536	30.5279	16.888	256.699	275.066
108167918	12.802	3.97365	81.8163	113.083
338352	3.93909	3.97365	53.1806	33.6192
12116	3.93909	6.95389	50.1125	67.2384
80982	20.6802	10.9275	160.565	152.815
100039100	0	7.9473	39.8855	33.6192
319188	0	1.98682	5.11352	5.09382
11847	5.90863	7.9473	54.2033	51.957
83555	29.5432	38.7431	258.744	272.01
108169063	1.96954	0	8.18163	2.03753
100861908	8.86295	8.94071	64.4304	62.1446
22420	5.90863	2.98024	28.6357	31.5817
23959	57.1168	70.5323	468.398	459.463
217071	0.984772	0	6.13622	1.01876
100042776	23.6345	26.8221	163.633	159.946
78174	0.984772	2.98024	12.2724	14.2627
15221	25.6041	23.8419	168.746	148.74
15415	4.92386	0	19.4314	15.2815
14465	27.5736	22.8485	156.474	165.04
208659	3.93909	3.97365	24.5449	22.4128
231382	6.8934	4.96706	37.8401	35.6567
668620	196.954	170.867	373.628	381.018
105242736	0.984772	0.993412	4.09082	9.16888
239102	105.371	106.295	677.03	645.897
118567871	1149.23	1084.81	6480.88	6647.44
19428	2.95432	0.993412	13.2952	10.1876
211623	2.95432	3.97365	26.5903	16.3002
620639	4.92386	3.97365	17.386	31.5817
14120	50.2234	47.6838	276.13	287.292
433485	17.7259	11.9209	83.8617	74.3698
115490161	591.848	602.008	3421.97	3194.84
100039052	113.249	127.157	656.576	644.878
17096	42.3452	53.6443	243.404	264.879
15511	25.6041	21.8551	156.474	91.6888
115489434	1.96954	0.993412	7.15893	9.16888
228802	5.90863	1.98682	22.4995	18.3378
64918	5.90863	4.96706	23.5222	32.6005
102631940	0.984772	0	4.09082	3.05629
72614	4.92386	1.98682	17.386	18.3378
83379	15.7564	8.94071	77.7255	64.1821
58176	17.7259	17.8814	98.1796	88.6325
100861891	53.1777	41.7233	475.557	2.03753
14202	13.7868	10.9275	62.385	60.1071
24088	47.2691	47.6838	242.381	229.222
637776	39.3909	68.5454	93.7479	84.5574
319189	5.90863	0	17.386	13.2439
212892	13.7868	8.94071	55.226	56.032
70054	7.87818	3.97365	36.8173	21.394
497114	0.984772	0.993412	3.06811	7.13135
17681	26.5888	22.8485	127.838	109.008
277328	21.665	29.8024	148.292	99.8389
17067	5.90863	4.96706	23.5222	27.5066
12570	14.7716	10.9275	66.4758	53.9945
668137	63.0254	57.6179	265.903	291.367
100041639	6.8934	7.9473	34.7719	38.713
13614	6.8934	4.96706	30.6811	23.4316
639910	40.3756	51.6574	241.358	192.546
20452	1362.92	1449.39	6145.43	6543.52
102640804	46.2843	31.7892	178.973	176.246
245350	29.5432	31.7892	43.2945	49.2403
100043292	109.31	86.4269	503.17	364.718
626995	38.4061	38.7431	166.701	172.171
72421	12.802	23.8419	83.8617	77.4261
83457	2.95432	2.98024	14.3179	8.15011
67412	42.3452	42.7167	63.4077	61.805
544881	53.1777	58.6113	80.1118	81.5011
74469	58.1015	66.5586	283.289	262.841
233801	13.7868	17.8814	74.6574	60.1071
665174	4.92386	9.93412	29.6584	35.6567
232333	69.9188	86.4269	324.197	338.23
24059	12.802	17.8814	56.2487	73.351
627488	136.883	0	217.836	363.699
68221	4.92386	2.98024	15.3406	19.3565
69329	8.86295	6.95389	33.7492	35.6567
21664	54.1625	58.6113	247.494	221.072
545763	2.95432	7.9473	19.4314	23.4316
75106	8.86295	14.9012	48.0671	41.7693
243834	21.665	19.8682	82.839	84.5574
23966	171.35	171.86	680.098	685.628
22341	131.959	124.177	513.397	520.589
100042782	2.95432	0	3.06811	8.15011
66654	3.93909	1.98682	11.2497	13.2439
74068	3.93909	8.94071	35.7946	23.4316
114642	18.7107	22.8485	74.6574	95.7638
13070	75.8274	63.5784	274.085	247.56
666214	2.95432	7.9473	21.4768	22.4128
74716	7.87818	14.9012	39.8855	52.9757
30951	4.09082	7.13135	23.6345	23.8419
67434	87.6447	64.5718	339.538	327.023
102640717	16.7411	8.94071	52.1579	50.9382
22441	9.84772	5.96047	36.8173	28.5254
433779	9.84772	9.93412	43.9763	32.6005
212712	29.5432	31.7892	120.679	123.27
107815	97.4924	84.44	340.56	368.793
320558	26.5888	30.7958	84.8844	130.402
105245236	11.8173	23.8419	82.839	50.9382
231510	31.5127	20.8617	105.339	95.7638
101604	11.8173	14.9012	49.0898	59.0883
232889	14.7716	24.8353	71.5893	50.9382
12519	45.2995	40.7299	55.9078	54.3341
434050	4.92386	2.98024	19.4314	10.1876
102632403	7.87818	2.98024	15.3406	20.3753
17380	847.889	835.46	3103.91	3183.64
14121	5.90863	11.9209	25.5676	42.7881
211135	12.802	17.8814	53.1806	62.1446
18595	57.1168	63.5784	236.245	221.072
329154	58.1015	61.5916	195.336	255.71
545126	47.2691	47.6838	166.701	184.396
544807	3.93909	1.98682	7.15893	15.2815
15364	457.919	469.884	1718.14	1718.66
105242435	164.457	134.111	596.237	513.457
18104	466.782	493.726	1819.39	1709.49
13132	79.7665	62.585	239.313	275.066
13853	3.93909	0.993412	4.09082	14.2627
240328	878.417	926.854	3180.61	3372.11
68511	42.3452	35.7628	50.1125	44.1464
19224	37.4213	43.7101	154.428	147.721
108169043	36.4366	58.6113	158.519	181.34
12523	51.2081	47.6838	174.882	178.284
319186	1.96954	0	4.09082	4.07506
211770	84.6904	82.4532	289.425	305.629
13813	87.6447	88.4137	311.925	302.573
72828	26.5888	17.8814	74.6574	63.1634
100043805	11.8173	4.96706	38.8628	17.319
214547	72.8731	90.4005	283.289	291.367
630077	24.6193	21.8551	76.7028	81.5011
16855	24.6193	10.9275	67.4985	57.0508
115489417	2993.71	2946.46	9402.74	10089.8
50523	48.2538	22.8485	101.248	96.7826
224598	18.7107	21.8551	63.4077	65.2009
170461	14.7716	11.9209	12.2724	30.5629
76261	10.8325	9.93412	41.9309	32.6005
67374	1135.44	1123.55	3776.85	3701.17
58175	15.7564	12.9144	51.1352	49.9194
18997	31.5127	42.7167	144.201	110.027
100502825	56.132	58.6113	208.632	190.509
12876	226.498	238.419	758.846	829.274
319187	2.95432	0	3.06811	6.11259
70676	27.5736	28.809	86.9299	101.876
100861668	2192.1	2195.44	7271.43	7450.22
544808	3.93909	3.97365	12.2724	14.2627
20899	208.772	204.643	702.598	642.84
69544	9.84772	14.9012	39.8855	42.7881
237009	0.984772	6.95389	11.2497	15.2815
18710	152.64	143.051	500.102	458.444
68070	66.9645	66.5586	226.018	238.391
434903	20.6802	18.8748	68.5212	61.1259
20537	24.6193	15.8946	62.385	70.2947
99890	105.371	86.4269	106.02	104.593
319876	20.6802	23.8419	76.7028	70.2947
208043	125.066	109.275	396.809	360.643
14735	316.112	300.01	330.674	340.946
545471	89.6142	102.321	309.879	305.629
12349	488.447	514.587	1558.6	1654.47
79554	61.0559	40.7299	56.5896	53.3153
74144	80.7513	59.6047	82.4981	68.9364
70951	5.90863	8.94071	26.5903	23.4316
110094	2033.55	1986.82	6150.54	6151.3
69574	1.96954	11.9209	23.5222	20.3753
384061	11.8173	14.9012	49.0898	35.6567
223664	52.1929	41.7233	131.929	128.364
14062	596.772	602.008	1917.57	1821.55
56096	2.95432	3.97365	7.15893	14.2627
319179	3.93909	2.98024	10.227	6.11259
100042698	73.8579	70.5323	205.564	130.402
97895	125.066	140.071	398.855	417.693
17203	23.6345	21.8551	70.5666	67.2384
241226	51.2081	36.7562	152.383	116.139
19766	125.066	119.209	389.65	362.68
56702	2.95432	4.96706	15.3406	9.16888
16911	70.9036	48.6772	164.655	198.659
100043227	3.93909	3.97365	0	22.4128
11484	14.7716	3.97365	23.5222	33.6192
118568243	39.3909	50.664	147.269	121.233
73614	23.6345	21.8551	74.6574	62.1446
67603	390.954	396.371	1200.65	1148.15
15433	21.665	22.8485	61.3622	71.3135
24113	21.665	20.8617	56.2487	71.3135
64113	206.802	117.223	387.605	565.414
17684	187.107	189.742	566.578	547.076
113853	5.90863	4.96706	20.4541	12.2252
243881	12.802	6.95389	27.613	30.5629
102639598	150.67	146.032	431.581	437.05
432999	69.9188	72.5191	69.5439	71.6531
52793	6.8934	0.993412	11.2497	12.2252
118568593	226.498	220.537	639.19	665.253
210573	26.5888	25.8287	81.8163	74.3698
68895	29.5432	38.7431	106.361	93.7263
320078	16.7411	14.9012	37.8401	55.0133
626596	29.5432	30.7958	92.0434	80.4824
381110	54.1625	70.5323	57.2714	63.8426
98558	164.457	160.933	472.489	464.556
628456	9.84772	3.97365	21.4768	24.4503
78703	31.5127	54.6377	138.065	109.008
71781	28.5584	32.7826	77.7255	94.7451
628709	481.553	504.653	1442.01	1414.04
235281	93.5533	103.315	265.903	289.329
240215	11.8173	16.888	42.9536	37.6943
24066	932.579	816.585	2476.99	2531.63
12151	107.34	118.216	310.902	328.042
70358	190.061	190.735	543.056	537.908
328365	227.482	173.847	543.056	577.639
13032	174.305	175.834	469.421	430.937
76367	36.4366	22.8485	83.8617	86.595
102991	16.7411	20.8617	44.999	58.0696
208777	198.924	198.682	549.192	547.076
381884	16.7411	20.8617	56.2487	48.9007
224224	165.442	153.979	430.558	453.35
67252	16.7411	10.9275	33.7492	43.8069
106407	27.5736	23.8419	73.6347	69.276
434693	114.234	111.262	311.925	307.667
229927	30.5279	23.8419	69.5439	80.4824
13819	253.086	281.136	716.916	754.904
14221	28.5584	31.7892	87.9526	78.4448
235180	121.127	108.282	290.448	323.967
13082	5.90863	8.94071	18.4087	22.4128
225724	72.8731	50.664	174.882	164.021
277978	107.34	129.144	326.243	304.611
115488129	38.4061	47.6838	128.861	112.064
78088	90.599	66.5586	217.836	210.884
242502	11.8173	6.95389	31.7038	18.3378
19289	121.127	108.282	323.175	303.592
232878	76.8122	75.4993	195.336	209.865
68797	25.6041	34.7694	93.0661	72.3323
67102	231.421	221.531	632.031	599.033
14368	66.9645	55.6311	169.769	168.096
12590	20.6802	30.7958	62.385	77.4261
103768	29.5432	22.8485	64.4304	73.351
626391	158.548	182.788	154.087	156.89
67168	42.3452	67.552	50.4534	49.5799
22717	524.883	513.594	1444.06	1354.96
319178	0.984772	5.96047	11.2497	6.11259
382231	153.624	168.88	389.65	398.337
381820	41.3604	63.5784	131.929	149.758
665622	5.90863	11.9209	14.3179	21.394
14187	296.416	321.866	851.913	817.049
76486	16.7411	18.8748	47.0444	49.9194
214058	42.3452	82.4532	174.882	145.683
207175	8.86295	8.94071	24.5449	23.4316
77634	3668.28	3750.13	14591.9	15003.3
115489487	2.95432	2.98024	8.18163	8.15011
20510	272.782	287.096	739.415	750.829
18022	12.802	10.9275	32.7265	32.6005
103551	1158.09	1162.29	3188.79	2978.87
241112	42.3452	27.8155	102.27	93.7263
117600	52.1929	60.5981	143.179	156.89
20649	52.1929	38.7431	115.566	125.308
68151	134.914	140.071	345.674	353.511
94089	36.4366	33.776	89.998	88.6325
245404	179.228	166.893	435.672	473.725
319185	2.95432	0.993412	5.11352	4.07506
13824	678.508	642.738	1617.92	1724.77
231724	113.249	117.223	299.652	293.404
232087	3395.49	3110.37	7746.98	7801.7
17131	378.152	347.694	918.388	984.126
101809	41.3604	43.7101	121.702	100.858
13731	71.8883	68.5454	178.973	183.378
15110	33.4822	21.8551	84.8844	58.0696
118567464	49.2386	51.6574	136.02	122.252
64009	2084.76	2111	5757.82	5850.76
631415	24.6193	19.8682	53.1806	59.0883
12577	39.8855	36.6755	103.401	107.289
67105	202.863	211.597	522.602	530.776
80889	53.1777	81.4598	186.132	155.871
381067	468.751	520.548	412.15	435.012
241230	37.4213	41.7233	98.1796	101.876
17869	185.137	183.781	497.034	437.05
71101	69.9188	52.6508	159.542	159.946
102633782	75.8274	75.4993	153.406	225.147
72281	18.7107	21.8551	52.1579	52.9757
434727	5.90863	7.9473	20.4541	14.2627
226101	1322.55	1373.89	3387.2	3377.2
73407	43.33	45.697	85.9071	87.6137
13482	174.305	173.847	440.785	465.575
104349	21.665	20.8617	57.2714	41.7693
232813	67.9493	74.5059	192.268	163.002
381990	520.944	532.469	659.644	681.553
234725	31.5127	32.7826	81.8163	80.4824
381217	57.1168	54.6377	132.952	141.608
68385	92.5686	89.4071	216.813	221.072
214601	30.5279	27.8155	25.5676	22.0732
105244717	7.87818	11.9209	21.4768	27.5066
20686	9.84772	9.93412	21.4768	27.5066
227697	49.2386	52.6508	119.656	131.421
12238	95.5229	119.209	284.312	250.616
214763	58.1015	54.6377	136.02	141.608
18037	14.7716	18.8748	35.7946	46.8632
73333	61.0559	62.585	146.247	157.908
100502880	128.02	112.256	303.743	285.254
102634030	144.761	156.959	355.901	381.018
319638	206.802	182.788	442.831	481.875
667666	1805.09	1747.41	4382.29	4279.83
333182	177.259	166.893	146.247	136.514
83557	3376.78	3356.74	8116.37	8186.5
18119	404.741	425.18	982.819	1035.06
12322	52.1929	72.5191	162.61	141.608
13506	34.467	53.6443	84.8844	129.383
74401	37.4213	36.7562	83.8617	95.7638
217664	246.193	240.406	194.655	202.394
328417	128.02	130.137	295.561	291.367
70081	100.447	89.4071	186.132	183.378
18019	102.416	93.3807	249.54	205.79
72512	27.5736	37.7497	76.7028	83.5387
192289	43.33	49.6706	99.2023	124.289
77777	38.4061	29.8024	74.6574	81.5011
75568	106.355	97.3544	238.29	259.785
118568335	2.95432	11.9209	17.386	18.3378
100861651	88.6295	94.3742	204.541	229.222
107869	1419.06	1390.78	3407.65	3338.49
24051	85.6752	76.4927	199.427	185.415
18671	190.061	169.873	404.991	444.181
242574	12.802	11.9209	27.613	31.5817
106861	35.4518	33.776	84.8844	77.4261
72128	36.4366	34.7694	86.9299	72.3323
211329	152.64	137.091	292.493	310.723
382562	27.5736	14.9012	52.1579	48.9007
100041979	204.833	211.597	432.604	437.05
225791	37.4213	33.776	76.7028	90.67
105245545	192.031	192.722	441.808	461.5
105245383	392.924	361.602	867.253	910.775
105245684	11.8173	0	7.15893	20.3753
56464	101.432	122.19	256.699	267.935
22227	13.7868	8.94071	27.613	25.4691
18802	32.4975	37.7497	79.7709	73.351
170722	18.7107	24.8353	46.0217	56.032
102636110	305.279	335.773	780.323	716.191
71775	19.6954	14.9012	41.9309	41.7693
20447	132.944	157.953	376.355	431.956
11864	65.9797	61.5916	153.406	147.721
236193	32.4975	39.7365	88.9753	77.4261
22643	149.685	144.045	351.81	329.061
230582	35.4518	21.8551	53.1806	56.032
14154	141.807	178.814	123.406	127.006
66812	470.721	506.64	1161.79	1171.58
231042	117.188	110.269	238.29	275.066
210105	89.6142	88.4137	203.518	202.734
14313	30.5279	28.809	65.4531	69.276
14459	2.95432	2.98024	5.11352	9.16888
118568028	10.8325	17.8814	47.0444	17.319
225884	25.6041	18.8748	46.0217	60.1071
76260	44.3147	51.6574	116.588	103.914
107303348	29.5432	26.8221	57.2714	69.276
228998	292.477	283.122	669.871	654.047
75847	290.508	284.116	641.235	684.61
72747	33.4822	37.7497	82.839	78.4448
74711	22.6498	14.9012	24.5449	44.8256
619605	330.883	358.622	831.458	757.961
71870	21.665	23.8419	49.0898	57.0508
100216455	155.594	178.814	387.605	369.811
108168963	1830.69	1866.62	4278.99	4121.92
230234	162.487	153.979	363.06	355.549
76223	11.8173	23.8419	41.9309	38.713
381651	7.87818	0	7.15893	11.2064
100503584	1659.34	1561.64	3646.96	3706.26
115489950	1299.9	1294.42	2942.32	2932
22689	110.294	108.282	272.039	229.222
22755	78.7818	81.4598	138.065	152.815
16782	306.264	258.287	628.963	631.634
236366	130.975	147.025	337.492	308.686
105245381	341.716	350.674	777.255	788.524
118567664	78.7818	82.4532	172.837	189.49
14807	423.452	409.286	929.638	951.526
12180	48.2538	43.7101	99.2023	107.989
272790	21.665	28.809	53.1806	60.1071
245020	22.6498	10.9275	27.613	37.6943
12913	83.7056	76.4927	172.837	188.471
100041283	34.467	38.7431	102.27	62.1446
102857	1840.54	1858.67	4065.25	4227.87
329504	66.9645	55.6311	138.065	134.477
107375	23.6345	10.9275	32.7265	34.638
213603	36.4366	45.697	93.0661	89.6513
73132	401.787	373.523	826.345	909.756
239435	204.833	275.175	567.601	510.401
20384	3837.66	3722.32	8228.68	8193.92
16668	359.442	357.628	801.8	804.824
13803	1469.28	1329.19	3100.84	3106.21
104271	198.924	200.669	429.536	442.144
269952	85.6752	86.4269	161.587	221.072
56758	154.609	142.058	330.333	328.042
22770	70.9036	77.4861	163.633	165.04
75458	109.31	96.361	197.382	201.715
100502941	76.8122	83.4466	190.223	165.04
66337	26.5888	34.7694	75.6801	64.1821
74352	153.624	140.071	307.834	341.286
224893	75.8274	69.5389	161.587	158.927
19655	169.381	221.531	371.242	422.787
21407	129.005	152.985	290.448	337.211
18751	78.7818	92.3873	171.814	165.04
56220	61.0559	53.6443	127.838	122.252
67155	32.4975	21.8551	57.2714	48.9007
17191	164.457	184.775	431.581	426.862
66808	322.02	313.918	725.097	731.473
664987	537.685	474.851	868.276	803.805
432879	46.2843	38.7431	86.9299	97.8014
217379	1278.23	1240.77	2692.78	2821.98
319653	1107.87	1049.04	1701.78	1747.18
16351	388.985	395.378	974.637	918.925
108167370	23.6345	22.8485	51.1352	49.9194
278240	15.7564	20.8617	44.999	38.713
100043034	2463.9	2391.14	5473.51	5142.72
330260	80.7513	62.585	158.519	154.852
56299	40.3756	51.6574	111.475	90.67
545938	82.7208	79.473	195.336	168.096
76498	14.7716	18.8748	25.5676	41.7693
109218	4.92386	7.9473	15.3406	19.3565
66686	410.65	478.825	981.796	966.807
331026	160.518	160.933	362.037	330.08
20618	63.0254	69.5389	153.406	139.571
80838	11.8173	8.94071	25.5676	20.3753
626316	2090.67	2024.57	4483.53	4434.68
56213	280.66	267.228	586.009	603.108
15417	15.7564	22.8485	43.9763	39.7318
76527	23.6345	25.8287	51.1352	55.0133
73284	135.899	121.196	269.994	286.273
22147	15.7564	15.8946	34.7719	33.6192
115489118	811.452	818.572	1784.62	1736.99
19672	1311.72	1317.26	2732.67	2938.12
17954	22.6498	20.8617	41.9309	51.957
68016	46.2843	49.6706	104.316	102.895
12955	78.7818	73.5125	142.156	173.19
320869	19.6954	25.8287	26.5903	42.7881
102639021	64.9949	55.6311	107.384	146.702
115488140	56.132	67.552	148.292	117.158
209334	280.66	294.05	609.532	624.502
320508	59.0863	40.7299	103.293	114.102
68755	44.3147	70.5323	85.9071	116.139
435818	21.665	14.9012	37.8401	43.8069
100505397	68.934	62.585	149.315	130.402
320563	68.934	90.4005	181.019	156.89
68276	317.097	301.004	643.281	680.534
238662	65.9797	51.6574	122.724	127.346
100041433	1001.51	1006.33	2187.56	2102.73
381845	29.5432	22.8485	59.3168	51.957
100271882	109.31	105.302	230.108	229.222
170439	2045.37	2042.46	4224.79	4473.39
217733	58.1015	77.4861	141.133	122.252
224585	124.081	148.018	285.334	293.404
245555	304.295	311.931	645.326	658.122
72219	52.1929	64.5718	131.929	118.177
66114	37.4213	36.7562	86.9299	70.2947
68659	146.731	170.867	351.81	321.929
238330	559.35	608.962	1269.18	1213.35
414801	38.4061	45.697	95.1115	79.4636
626854	673.584	697.375	1503.38	1424.23
11811	27.5736	29.8024	59.3168	63.1634
282619	169.381	174.841	174.882	170.134
70536	35.4518	37.7497	76.7028	77.4261
434179	283.614	283.122	599.305	595.977
30806	52.1929	30.7958	85.9071	90.67
12683	30.5279	21.8551	55.226	56.032
74405	28.5584	29.8024	58.2941	64.1821
100040500	65.9797	59.6047	144.201	118.177
105247207	593.817	607.968	1288.61	1235.76
100043257	35.4518	25.8287	72.612	55.0133
17180	22.6498	19.8682	38.8628	49.9194
226422	80.7513	68.5454	148.292	167.077
77200	44.3147	57.6179	99.2023	115.12
242691	47.2691	76.4927	144.201	115.12
71448	17.7259	26.8221	42.9536	48.9007
277154	271.797	228.485	498.057	546.058
68614	66.9645	63.5784	139.088	136.514
170938	360.427	301.997	663.735	715.172
102634296	145.746	152.985	319.084	303.592
12616	263.919	278.155	592.146	534.851
54128	159.533	176.827	349.765	351.474
70911	115.218	94.3742	202.495	219.034
57896	261.949	304.978	598.282	577.639
100163	219.604	221.531	457.149	442.144
100039707	100.447	105.302	287.38	252.654
56332	462.843	440.082	975.66	871.043
20706	40.3756	49.6706	91.0207	97.8014
623078	27.5736	28.809	55.226	62.1446
66892	16.7411	23.8419	35.7946	49.9194
100041379	3862.28	4098.82	8466.97	7956.55
68519	48.2538	48.6772	98.1796	97.8014
22700	84.6904	101.328	199.427	179.303
26408	115.218	110.269	233.177	229.222
76080	98.4772	76.4927	158.519	202.734
170716	153.624	139.078	265.903	310.723
434769	20.6802	5.96047	25.5676	30.5629
22025	146.731	149.012	303.743	305.629
239099	84.6904	58.6113	148.292	141.608
215160	192.031	200.669	421.354	376.943
71699	55.1472	36.7562	91.0207	97.8014
15423	10.8325	15.8946	26.5903	25.4691
70350	548.518	630.817	1202.7	1219.46
57279	883.34	916.919	1839.84	1859.24
114585	31.5127	22.8485	60.3395	50.9382
56707	264.904	246.366	476.58	462.519
210162	103.401	124.177	228.063	235.335
69834	78.7818	75.4993	171.814	143.646
268670	63.0254	51.6574	121.702	115.12
12038	62.0406	44.7035	100.225	118.177
106759	56.132	57.6179	104.316	128.364
414758	50.2234	55.6311	104.316	96.7826
93739	2817.43	2945.47	6139.29	5740.74
13511	725.777	692.408	1434.85	1443.59
106338	121.127	109.275	251.585	284.235
66356	1829.71	1948.08	3765.6	3879.45
320343	28.5584	30.7958	61.3622	58.0696
70227	73.8579	64.5718	120.679	163.002
77521	77.797	71.5257	150.338	160.965
75547	1178.77	1200.04	2589.49	2619.24
106878	75.8274	78.4796	157.496	155.871
449000	510.112	586.113	1110.66	1109.43
17387	221.574	223.518	428.513	468.632
630579	668.66	683.468	1333.61	1379.41
233280	83.7056	84.44	176.928	163.002
268860	45.2995	49.6706	94.0888	99.8389
21807	1924.24	1987.82	3716.51	3731.73
100041262	93.5533	79.473	177.951	171.152
69893	203.848	184.775	380.446	401.393
69226	95.5229	112.256	215.791	198.659
15422	28.5584	35.7628	59.3168	70.2947
78921	51.2081	36.7562	82.839	90.67
320360	192.031	216.564	385.559	414.637
105855	79.7665	70.5323	158.519	153.833
108755	93.5533	94.3742	184.087	192.546
18020	1952.8	2066.3	3931.27	4037.36
380669	812.437	754	1567.57	1553.97
118568062	48.2538	49.6706	105.339	89.6513
108652	67.9493	76.4927	141.133	119.195
327951	442.163	431.141	809.982	893.456
14472	124.081	96.361	231.131	206.809
225280	252.102	272.195	492.943	547.076
242736	283.614	268.221	529.761	563.377
22127	50.2234	43.7101	97.1569	93.7263
68119	84.6904	85.4334	169.769	168.096
72580	182.183	187.755	283.289	297.479
328381	51.2081	44.7035	110.452	91.6888
665113	71.8883	66.5586	137.042	122.252
65969	109.31	105.302	222.95	198.659
110956	441.178	414.253	838.617	864.931
53318	17.7259	9.93412	30.6811	24.4503
94092	41.3604	52.6508	88.9753	96.7826
11857	56.132	62.585	117.611	119.195
17916	126.051	160.933	277.153	288.31
70484	145.746	133.117	265.903	279.141
105732	71.8883	58.6113	130.906	103.914
77552	20.6802	17.8814	34.7719	41.7693
115489972	23.6345	20.8617	39.8855	45.8444
66854	636.163	657.639	1236.45	1306.06
22715	5093.24	5252.17	9936.59	10348.6
69288	32.4975	33.776	62.385	64.1821
75725	521.929	521.541	988.955	1028.95
140484	304.295	282.129	573.737	567.452
67198	35.4518	35.7628	74.6574	60.1071
102640673	235.36	243.386	493.966	444.181
118567355	24.6193	27.8155	47.0444	57.0508
78134	64.9949	62.585	121.702	128.364
14859	59.0863	55.6311	106.361	123.27
21941	61.0559	46.6904	85.9071	123.27
102639577	0	1.98682	2.04541	2.03753
107328	26.5888	30.7958	57.2714	46.8632
629242	107.34	113.249	223.972	205.79
78894	465.797	486.772	969.524	889.381
83669	1179.76	1102.69	2187.56	2262.68
16402	1340.27	1326.21	2546.53	2651.84
66161	555.411	577.172	1103.5	1112.49
20689	54.1625	80.4664	146.247	117.158
18952	18.7107	26.8221	47.0444	44.8256
14725	513.066	494.719	944.979	1011.63
26559	454.965	425.18	863.162	819.086
382073	44.3147	47.6838	89.998	90.67
78802	92.5686	95.3676	186.132	177.265
26549	81.7361	92.3873	205.564	227.184
67727	138.853	130.137	251.585	269.973
240038	26.5888	38.7431	59.3168	71.3135
74482	3.93909	4.96706	11.2497	6.11259
14179	4.92386	6.95389	6.13622	12.2252
18484	155.594	134.111	276.13	287.292
78833	371.259	370.543	714.87	725.36
554327	63.0254	47.6838	109.429	88.6325
80985	1409.21	1398.72	2719.37	2707.88
69051	808.498	792.743	1503.38	1607.61
74174	26.5888	20.8617	41.9309	48.9007
22759	823.269	798.703	1575.99	1558.71
408065	75.8274	70.5323	130.906	151.796
74519	14.7716	15.8946	38.8628	21.394
210808	87.6447	92.3873	162.61	175.227
68802	69.9188	61.5916	131.929	122.252
194237	57.1168	84.44	122.724	149.758
22673	342.701	288.09	640.213	579.677
224143	1206.35	1290.44	2408.47	2331.95
16495	28.5584	31.7892	50.1125	65.2009
20471	189.076	181.794	343.629	369.811
268759	62.0406	66.5586	126.815	121.233
242747	61.0559	53.6443	102.27	118.177
27410	165.442	148.018	298.63	302.573
72691	24.6193	12.9144	44.999	27.5066
93759	1203.39	1218.92	2326.65	2310.56
115488002	124.081	143.051	241.358	270.991
73671	78.7818	72.5191	145.224	142.627
93695	29.5432	41.7233	73.6347	74.3698
21974	957.198	956.656	1833.71	1829.7
433801	731.686	735.125	1382.7	1344.77
228432	164.457	145.038	296.584	327.023
11781	454.965	468.891	920.434	901.606
22364	8.86295	11.9209	24.5449	15.2815
71508	89.6142	104.308	199.427	172.171
17252	934.549	902.018	1745.76	1757.37
229905	329.899	362.595	700.552	630.615
98496	212.711	207.623	402.945	404.449
78890	89.6142	88.4137	184.087	155.871
103213	131.959	128.15	230.108	239.41
74682	1189.6	1210.97	2263.24	2302.41
68273	452.01	426.174	838.617	832.33
102644	26.5888	23.8419	54.2033	41.7693
104799	328.914	342.727	641.235	635.709
100043468	432.315	417.233	799.755	769.167
23881	10504.6	10465.6	19836.4	19728.4
213208	36.4366	30.7958	67.4985	60.1071
105245406	29.5432	40.7299	60.3395	72.3323
56554	116.203	117.223	212.722	229.222
329795	96.5076	123.183	202.495	212.922
20301	42.3452	33.776	61.3622	73.351
211482	16.7411	20.8617	30.6811	39.7318
97484	342.701	302.991	615.668	607.183
381678	770.092	774.861	1451.22	1473.13
16987	1434.81	1341.11	2647.78	2658.97
218734	92.5686	89.4071	160.565	136.514
12164	39.3909	31.7892	71.5893	63.1634
381062	288.538	324.846	527.715	463.538
118568683	111.279	127.157	215.791	252.654
58194	68.934	80.4664	146.247	135.496
27056	39.3909	48.6772	86.9299	76.4073
17395	37.4213	37.7497	67.4985	75.3886
99334	121.127	93.3807	198.405	213.94
14745	252.102	251.333	474.535	457.425
71918	229.452	192.722	380.446	413.618
74189	16.7411	14.9012	23.5222	36.6755
71709	19.6954	33.776	58.2941	43.8069
21687	172.335	142.058	267.948	323.967
228869	388	355.642	624.872	696.835
108673	199.909	192.722	377.378	362.68
108105	395.878	340.74	694.416	680.534
330301	32.4975	29.8024	58.2941	64.1821
55951	360.427	384.451	729.188	677.478
56047	42.3452	37.7497	77.7255	73.351
105242430	95.5229	95.3676	179.996	156.89
76803	915.838	957.649	1823.48	1788.95
118568032	38.4061	37.7497	83.8617	75.3886
113523645	22.6498	12.9144	27.613	39.7318
74186	180.213	163.913	334.424	311.742
74561	35.4518	34.7694	68.5212	63.1634
30934	388	399.352	742.483	735.548
13136	263.919	261.267	498.057	463.538
15394	48.2538	47.6838	83.8617	86.595
74729	39.3909	57.6179	79.7709	100.858
72107	158.548	121.196	247.494	269.973
77532	110.294	92.3873	211.7	168.096
19088	81.7361	76.4927	131.929	152.815
100233208	146.731	155.966	253.631	309.704
53945	47.2691	33.776	71.5893	79.4636
213011	53.1777	84.44	123.747	120.214
67161	139.838	171.86	260.79	316.836
19038	332.853	370.543	648.394	673.403
245595	36.4366	35.7628	67.4985	70.2947
320214	21.665	20.8617	40.9082	37.6943
22773	994.62	1060.96	1898.14	1933.61
140792	33.4822	43.7101	66.4758	77.4261
620807	24.6193	28.809	61.3622	38.713
64337	4.92386	5.96047	7.15893	14.2627
83396	232.406	257.294	485.784	479.838
223227	31.5127	39.7365	71.5893	61.1259
239133	8.86295	11.9209	20.4541	18.3378
11932	546.548	505.647	912.252	1021.82
74513	66.9645	66.5586	124.77	125.308
234669	27.5736	26.8221	43.9763	56.032
27226	87.6447	94.3742	158.519	180.321
105377	227.482	210.603	445.899	449.275
330149	21.665	31.7892	53.1806	40.7506
102637087	321.036	337.76	598.282	618.39
75801	296.416	324.846	586.009	529.757
238555	36.4366	48.6772	75.6801	80.4824
108168096	18.7107	20.8617	37.8401	34.638
100041279	1.96954	4.96706	4.09082	7.13135
96957	45.2995	53.6443	92.0434	81.5011
75991	712.975	690.421	1241.56	1280.59
66396	359.442	370.543	656.576	667.291
105245424	327.929	366.569	653.508	630.615
270156	381.107	403.325	732.256	715.172
104001	48.2538	44.7035	80.7936	101.876
93761	227.482	224.511	397.832	381.018
18585	256.041	264.248	467.376	515.495
67077	57.1168	62.585	115.566	109.008
97243	135.899	173.847	277.153	293.404
380855	61.0559	54.6377	110.452	103.914
12368	173.32	185.768	349.765	314.798
18611	557.381	500.68	938.842	1011.63
52829	23.6345	39.7365	62.385	55.0133
268958	25.6041	25.8287	44.999	53.9945
57784	129.005	119.209	221.927	220.053
16403	3094.15	2986.2	5480.67	5694.89
217066	39.3909	39.7365	79.7709	67.2384
12558	114.234	114.242	205.564	210.884
66952	62.0406	57.6179	112.497	107.989
240041	447.086	453.989	823.277	823.161
102639229	346.64	316.898	572.714	631.634
629016	89.6142	92.3873	164.655	166.059
76425	1670.17	1560.65	3032.32	3205.03
11555	57.1168	54.6377	92.0434	112.064
102637839	52.1929	54.6377	79.7709	105.951
56873	129.005	86.4269	170.792	186.434
109154	3242.85	3144.15	5597.26	5979.13
69590	41.3604	48.6772	86.9299	81.5011
21818	54.1625	60.5981	111.475	101.876
68172	182.183	191.729	337.492	352.492
68034	32.4975	30.7958	64.4304	50.9382
102636203	5.90863	0	5.11352	6.11259
68721	41.3604	34.7694	79.7709	94.7451
73713	72.8731	59.6047	127.838	115.12
229776	80.7513	59.6047	111.475	140.589
240892	246.193	243.386	439.763	446.219
100463512	116.203	150.005	272.039	258.766
67136	300.355	299.017	538.965	546.058
226351	152.64	135.104	250.563	270.991
13852	112.264	97.3544	190.223	189.49
27027	8.86295	16.888	22.4995	25.4691
207686	32.4975	26.8221	40.9082	52.9757
14463	71.8883	67.552	129.883	122.252
232879	131.959	124.177	278.176	220.053
108897	130.975	180.801	276.13	287.292
105245577	101.432	94.3742	193.291	161.984
30054	801.604	799.697	1437.92	1361.07
338354	102.416	87.4203	154.428	186.434
11432	249.147	210.603	411.127	420.75
16592	742.518	804.664	1445.08	1375.33
269823	86.6599	87.4203	156.474	151.796
66075	2593.89	2614.66	5793.62	5937.36
68024	47.2691	58.6113	129.883	130.402
75686	32.4975	29.8024	49.0898	53.9945
433804	1362.92	1358.99	2498.47	2426.7
18764	394.894	355.642	655.553	679.516
100043772	776.985	746.053	1405.2	1423.21
100043899	28.5584	13.9078	32.7265	32.6005
231151	143.777	165.9	254.653	296.46
665738	109.31	110.269	212.722	184.396
71163	216.65	237.426	400.9	417.693
75746	202.863	207.623	374.31	359.624
546024	131.959	139.078	221.927	201.715
108015	56.132	57.6179	96.1342	115.12
18619	16.7411	14.9012	31.7038	24.4503
73910	47.2691	41.7233	75.6801	83.5387
668212	204.833	202.656	365.105	357.586
114664	625.33	554.324	1022.7	1094.15
66552	536.701	454.983	829.413	867.987
66917	1174.83	1216.93	2115.97	2161.82
66461	150.67	131.13	249.54	256.729
28064	256.041	231.465	449.99	385.093
212679	173.32	162.92	278.176	321.929
230500	124.081	112.256	200.45	230.241
320916	59.0863	63.5784	114.543	103.914
108167945	97.4924	89.4071	175.905	156.89
277463	662.751	653.665	1133.16	1208.25
19272	978.863	970.564	1713.03	1744.12
76650	322.02	314.912	562.487	574.583
18669	677.523	668.566	1313.15	1270.4
13875	776	867.249	1525.87	1463.96
432582	130.975	141.065	207.609	275.066
15939	84.6904	90.4005	171.814	137.533
100862203	136.883	149.012	285.334	224.128
17158	674.569	724.197	1204.75	1271.42
72230	59.0863	76.4927	108.407	111.045
67369	64.0102	48.6772	117.611	82.5199
75424	210.741	200.669	350.788	376.943
118568053	287.553	312.925	544.079	520.589
15507	1514.58	1545.75	2759.26	2730.29
13423	124.081	95.3676	194.314	195.603
26879	219.604	208.617	375.332	386.112
223978	215.665	248.353	401.923	414.637
18162	72.8731	73.5125	122.724	113.083
118567641	104.386	82.4532	150.338	179.303
195531	783.878	807.644	1394.97	1410.99
19881	22.6498	29.8024	47.0444	45.8444
74388	402.772	376.503	637.145	732.491
58222	25.6041	17.8814	37.8401	34.638
101744	48.2538	41.7233	66.4758	69.276
26364	1416.1	1470.25	2602.78	2554.04
381236	97.4924	92.3873	158.519	177.265
211378	92.5686	84.44	155.451	158.927
100529082	8.86295	10.9275	22.4995	12.2252
230101	208.772	216.564	364.083	383.055
118568718	4145.89	4163.39	7397.22	7500.14
105450	294.447	310.938	535.897	525.682
72726	45.2995	44.7035	75.6801	82.5199
319581	184.152	164.906	331.356	284.235
54156	20.6802	24.8353	39.8855	39.7318
330217	17.7259	12.9144	23.5222	29.5442
619301	49.2386	55.6311	67.4985	59.0883
56473	1379.67	1365.94	2356.31	2454.2
100201	1352.09	1375.88	2393.13	2378.81
16432	704.112	713.27	1299.86	1189.92
100503572	103.401	131.13	204.541	209.865
626832	222.558	215.57	419.309	345.361
237222	467.767	452.996	794.641	786.486
22694	508.142	466.904	832.481	847.612
93897	104.386	130.137	209.654	199.678
229600	66.9645	49.6706	100.225	116.139
22701	303.31	276.169	485.784	449.275
328918	26.5888	31.7892	53.1806	44.8256
22704	47.2691	34.7694	81.8163	64.1821
72397	176.274	155.966	288.403	257.747
233913	58.1015	58.6113	109.429	95.7638
666584	163.472	131.13	249.54	262.841
16348	122.112	117.223	191.246	225.147
56364	1164.99	1077.85	1886.89	1890.83
330064	278.69	302.991	506.239	502.251
71566	58.1015	56.6245	96.1342	102.895
50754	467.767	481.805	814.072	824.18
67088	166.426	136.097	263.858	257.747
224093	97.4924	111.262	187.155	176.246
230657	291.492	277.162	499.08	487.988
69583	47.2691	67.552	96.1342	102.895
404337	5.90863	6.95389	9.20434	13.2439
108168098	60.0711	46.6904	96.1342	89.6513
16155	22.6498	21.8551	33.7492	43.8069
74901	365.35	332.793	591.123	618.39
117149	120.142	124.177	212.722	212.922
234577	49.2386	42.7167	66.4758	93.7263
270624	64.0102	91.3939	132.952	137.533
102633424	300.355	307.958	524.647	524.664
76137	67.9493	83.4466	122.724	139.571
71913	77.797	81.4598	126.815	154.852
108899	141.807	139.078	238.29	245.522
14314	1019.24	1001.36	1703.83	1792.01
13835	143.777	131.13	257.721	216.997
74012	245.208	268.221	443.854	443.162
75698	437.239	434.121	717.938	750.829
26903	184.152	197.689	331.356	319.892
105663	258.995	251.333	440.785	442.144
18584	311.188	312.925	546.124	536.889
14275	393.909	418.227	733.279	669.328
79233	58.1015	54.6377	93.0661	99.8389
66296	519.96	536.443	927.593	898.55
75533	6.8934	2.98024	12.2724	5.09382
258854	14.7716	13.9078	28.6357	21.394
66832	72.8731	61.5916	115.566	116.139
18028	275.736	238.419	440.785	450.294
117606	56.132	81.4598	116.588	120.214
18130	811.452	878.176	1430.76	1537.32
29857	119.157	122.19	251.585	168.096
14537	416.559	404.319	744.529	679.516
26901	78.7818	115.236	178.973	167.077
212862	299.371	316.898	444.876	429.918
115489888	34.467	19.8682	44.999	47.8819
70118	73.8579	74.5059	118.634	136.514
17472	35.4518	37.7497	66.4758	55.0133
66395	1874.02	1809	3024.14	3227.45
329575	630.254	609.955	1057.48	1068.68
231386	1309.75	1200.04	2173.25	2140.42
107022	76.8122	83.4466	138.065	137.533
12484	763.198	828.506	1319.29	1421.18
110454	238.315	182.788	368.173	365.736
112415	235.36	212.59	379.423	354.53
68178	595.787	572.205	969.524	1028.95
74238	145.746	166.893	244.426	230.241
246728	39.3909	38.7431	68.5212	57.0508
73218	65.9797	57.6179	114.543	95.7638
227960	476.63	502.667	861.117	815.011
544990	19.6954	14.9012	34.7719	24.4503
15235	42.3452	29.8024	62.385	62.1446
23912	294.447	299.017	353.856	334.155
434218	74.8427	71.5257	96.1342	102.895
72147	83.7056	113.249	171.814	175.227
170936	876.447	843.407	1436.9	1424.23
268656	570.183	538.429	917.366	983.107
12153	115.218	121.196	201.473	202.734
328977	1019.24	1032.16	1742.69	1790.99
353211	254.071	269.215	424.422	465.575
11610	640.102	600.021	1106.57	1007.56
67916	243.239	244.379	383.514	448.256
14570	98.4772	86.4269	184.087	134.477
12091	821.3	807.644	1407.24	1371.26
434233	1199.45	1159.31	2037.23	1999.83
72139	104.386	107.289	183.064	179.303
105242433	581.015	641.744	1037.02	1040.16
16475	834.102	795.723	1421.56	1389.59
67371	567.229	600.021	1007.36	979.032
68441	771.076	849.367	1401.1	1363.11
628705	7.87818	15.8946	24.5449	16.3002
17344	2587	2687.18	4150.13	4137.2
14972	584.955	563.265	984.864	953.563
71233	9.84772	9.93412	23.5222	10.1876
17961	29.5432	33.776	44.999	57.0508
433667	809.483	764.927	1316.22	1347.83
12817	37.4213	48.6772	62.385	74.3698
242521	336.792	340.74	552.26	592.921
233836	123.096	99.3412	182.041	207.828
170753	575.107	605.981	949.069	1043.21
93843	49.2386	64.5718	97.1569	97.8014
73852	70.9036	83.4466	128.861	124.289
225845	308.234	321.866	491.921	554.208
54378	56.132	49.6706	107.384	104.933
100041621	47.2691	42.7167	50.1125	87.6137
19664	6938.7	6824.74	11436.9	11789.1
545428	98.4772	83.4466	152.383	154.852
105785	589.878	625.85	996.114	1067.66
93709	86.6599	75.4993	127.838	143.646
16835	1204.38	1089.77	1960.52	1910.18
56314	103.401	92.3873	157.496	159.946
56077	629.269	637.771	1033.95	1082.95
60597	89.6142	141.065	211.7	177.265
170823	391.939	396.371	655.553	674.422
242109	445.117	436.108	748.619	689.703
102642386	493.371	537.436	881.571	855.762
241944	268.843	259.281	428.513	458.444
238130	133.929	129.144	203.518	234.316
56503	264.904	270.208	464.308	427.881
115487436	38.4061	27.8155	43.9763	68.2572
100040563	845.919	943.742	1434.85	1548.52
218121	52.1929	49.6706	73.6347	97.8014
18798	425.421	395.378	704.643	663.216
230837	149.685	169.873	271.017	257.747
93834	91.5838	90.4005	131.929	124.289
105833	13.7868	29.8024	31.7038	29.5442
66286	159.533	151.992	262.835	266.916
78412	45.2995	22.8485	43.9763	51.957
16691	618.437	623.863	1021.68	1064.61
14700	170.366	196.696	312.947	306.648
100043381	111.279	73.5125	227.04	120.214
67473	107.34	93.3807	168.746	156.89
50723	266.873	277.162	437.717	471.688
100040682	5.90863	9.93412	17.386	11.2064
73703	944.396	959.636	1592.35	1596.4
235048	211.726	190.735	316.016	356.567
58235	326.944	305.971	537.942	516.513
319801	1123.62	1093.75	2464.72	2390.02
74194	304.295	324.846	527.715	522.626
15378	66.9645	54.6377	106.361	96.7826
103080	644.041	593.067	1029.86	1010.61
380850	96.5076	88.4137	159.542	149.758
75914	802.589	806.651	1301.9	1377.37
108058	53.1777	48.6772	89.998	89.6513
270066	1098.02	1031.16	1719.17	1815.44
434197	89.6142	63.5784	137.042	121.233
208618	1401.33	1238.78	2168.13	2236.19
108012	321.036	359.615	601.35	526.701
382867	313.157	277.162	477.603	507.345
106143	2367.39	2352.4	3822.87	4000.69
66398	134.914	148.018	258.744	226.166
105171	1027.12	1088.78	1717.12	1724.77
210982	1098.02	1127.52	1791.78	1855.17
69577	402.772	358.622	650.44	573.564
68695	283.614	310.938	434.649	468.632
11987	1749.94	1829.87	2902.43	2995.17
233893	104.386	95.3676	160.565	172.171
106042	67.9493	72.5191	113.52	119.195
69482	456.934	427.167	717.938	746.754
67512	366.335	380.477	659.644	583.752
381629	194.985	166.893	301.698	309.704
20321	602.68	594.06	997.137	987.183
78257	57.1168	40.7299	77.7255	100.858
664969	0	3.97365	3.06811	3.05629
20732	676.538	664.593	1084.07	1134.9
106947	43.33	50.664	72.612	83.5387
20776	12.802	17.8814	18.4087	23.4316
378462	45.2995	54.6377	86.9299	82.5199
68545	39.3909	38.7431	61.3622	69.276
109169	27.5736	41.7233	49.0898	66.2197
20383	6302.54	6466.12	10537.9	10519.8
225895	269.828	258.287	442.831	428.9
321000	158.548	123.183	217.836	214.959
94191	455.949	510.614	808.959	778.336
12335	68.934	70.5323	116.588	116.139
71710	349.594	323.852	576.805	553.189
381549	87.6447	80.4664	140.11	141.608
72148	403.756	418.227	652.485	700.91
244049	180.213	172.854	282.266	295.442
100041734	290.508	290.076	457.149	482.894
108672	291.492	294.05	446.922	539.945
54399	246.193	254.314	401.923	427.881
223665	30.5279	27.8155	56.2487	39.7318
72144	713.96	614.922	1104.52	1089.06
74568	21.665	20.8617	35.7946	33.6192
68229	499.279	475.844	817.141	747.773
320492	54.1625	67.552	94.0888	100.858
19302	112.264	129.144	222.95	192.546
78767	55.1472	56.6245	86.9299	96.7826
20620	843.95	814.598	1355.08	1370.24
72008	151.655	127.157	223.972	236.353
16874	46.2843	53.6443	88.9753	75.3886
71242	57.1168	40.7299	91.0207	73.351
67305	96.5076	80.4664	136.02	155.871
67249	258.995	238.419	366.128	365.736
382252	1190.59	1143.42	1911.43	1922.41
109624	1025.15	977.518	1610.76	1671.79
227682	622.376	659.626	975.66	1073.78
19057	60.0711	48.6772	84.8844	91.6888
14661	6588.12	6611.16	10496	11100.5
230257	2275.81	2196.43	3601.96	3674.68
67011	472.691	452.996	669.871	763.054
67636	170.366	164.906	271.017	263.86
22222	856.752	893.078	1404.17	1439.51
11890	15.7564	16.888	32.7265	21.394
66136	591.848	559.291	960.319	965.788
379043	106.355	127.157	177.951	192.546
77485	220.589	285.109	401.923	412.6
110821	366.335	316.898	529.761	569.489
11569	2233.46	2182.53	3470.04	3569.75
69126	837.056	938.774	1440.99	1316.24
105246961	200.893	202.656	305.789	312.761
105940408	138.853	103.315	184.087	191.528
16469	107.34	123.183	203.518	172.171
239393	200.893	188.748	326.243	309.704
213389	37.4213	36.7562	63.4077	45.8444
73254	432.315	407.299	691.348	661.178
234362	577.076	560.284	910.207	909.756
110957	277.706	269.215	456.126	435.012
16543	72.8731	79.473	128.861	120.214
432442	200.893	184.775	282.266	322.948
70021	1593.36	1533.83	2549.6	2619.24
80902	76.8122	103.315	131.929	144.665
17118	606.619	666.58	1046.23	1053.4
22644	129.005	117.223	208.632	192.546
105348	2094.61	2114.97	3479.24	3358.87
114249	163.472	183.781	293.516	276.085
11745	142.792	128.15	222.95	219.034
117903916	650.934	647.705	1073.84	1039.14
78689	1229.98	1183.15	1928.82	1978.44
106564	207.787	187.755	330.333	312.761
105245389	81.7361	90.4005	138.065	153.833
330474	476.63	459.95	798.732	720.266
100034363	23.6345	32.7826	52.1579	40.7506
12121	167.411	162.92	242.381	236.353
56878	486.477	515.581	771.119	873.081
11988	79.7665	65.5652	105.339	128.364
102607	216.65	194.709	300.675	348.417
75599	111.279	105.302	179.996	175.227
74718	214.68	183.781	330.333	303.592
101056073	4039.53	3999.48	6716.1	6375.43
105243585	43.33	39.7365	70.5666	64.1821
17872	641.087	660.619	1069.75	1037.1
12803	19.6954	17.8814	32.7265	28.5254
20957	141.807	156.959	239.313	231.259
66614	545.564	515.581	808.959	895.494
268903	230.437	238.419	388.628	368.793
94279	92.5686	108.282	169.769	153.833
74386	916.823	950.695	1545.31	1505.73
71979	75.8274	79.473	137.042	114.102
76448	397.848	405.312	633.054	634.69
319181	1.96954	2.98024	2.04541	5.09382
110196	2777.06	2884.87	4648.19	4501.92
55947	259.98	252.327	417.263	414.637
13036	32.4975	36.7562	55.226	57.0508
230603	26.5888	30.7958	47.0444	49.9194
54636	221.574	225.505	380.446	337.211
81904	263.919	280.142	436.695	436.031
666244	32.4975	39.7365	67.4985	52.9757
27376	51.2081	43.7101	77.7255	74.3698
69697	734.64	749.033	1251.79	1100.27
56395	130.975	126.163	208.632	204.772
80752	35.4518	33.776	56.2487	53.9945
56389	377.168	369.549	600.327	567.452
56737	299.371	297.03	467.376	489.007
381410	191.046	168.88	288.403	289.329
16068	81.7361	87.4203	149.315	138.552
71891	341.716	407.299	420.331	418.712
15467	722.823	697.375	1104.52	1168.52
260409	102.416	89.4071	159.542	158.927
13478	228.467	193.715	351.81	333.136
21417	324.975	354.648	524.647	525.682
68972	100.447	97.3544	162.61	156.89
12460	479.584	449.022	753.733	746.754
235050	95.5229	103.315	161.587	165.04
243905	2842.05	2799.44	4335.24	4632.32
79044	166.426	198.682	290.448	300.535
216961	43.33	26.8221	58.2941	57.0508
140917	162.487	171.86	254.653	277.104
382019	77.797	69.5389	113.52	121.233
620419	57.1168	48.6772	87.9526	80.4824
77038	627.3	558.298	885.662	1003.48
11747	271.797	331.8	474.535	491.044
71591	95.5229	107.289	167.723	155.871
69870	361.411	416.24	359.992	403.431
74051	517.005	487.765	777.255	790.561
66610	41.3604	53.6443	65.4531	62.1446
665001	229.452	179.808	251.585	328.042
55927	116.203	100.335	156.474	189.49
77652	442.163	448.029	722.029	689.703
319535	134.914	140.071	219.881	212.922
67867	351.564	337.76	587.032	494.101
14073	52.1929	63.5784	100.225	84.5574
67946	283.614	301.004	471.467	432.975
231602	41.3604	46.6904	74.6574	63.1634
224860	46.2843	57.6179	88.9753	78.4448
58248	286.569	263.254	425.445	372.868
100040531	502.234	476.838	809.982	769.167
211986	361.411	329.813	550.215	547.076
12411	702.142	641.744	1039.07	1095.17
21912	178.244	198.682	306.811	317.854
69524	45.2995	53.6443	82.839	74.3698
68303	79.7665	83.4466	126.815	132.439
26409	1484.05	1498.07	2369.61	2353.35
24060	518.975	598.034	876.457	869.006
71862	143.777	148.018	215.791	239.41
19250	479.584	436.108	712.825	743.698
118567479	59.0863	55.6311	96.1342	84.5574
20449	344.67	354.648	577.828	534.851
209032	355.503	341.734	549.192	553.189
408062	111.279	130.137	189.2	179.303
64436	150.67	140.071	226.018	249.597
14872	157.564	156.959	263.858	247.56
230484	2694.34	2676.25	4184.91	4241.12
231252	106.355	107.289	182.041	156.89
320129	132.944	116.229	198.405	196.621
237411	132.944	127.157	204.541	208.847
109676	100.447	115.236	152.383	133.458
108958	160.518	144.045	222.95	259.785
101867	519.96	519.555	802.823	842.518
77422	92.5686	89.4071	132.952	156.89
75710	1008.41	994.406	1559.62	1606.59
100039794	17.7259	13.9078	28.6357	22.4128
94045	39.3909	50.664	75.6801	66.2197
27059	1043.86	1009.31	1640.42	1599.46
17936	267.858	240.406	413.172	397.318
18033	665.706	651.678	1074.86	1005.52
71702	4860.83	5026.67	7947.43	7673.33
75590	1672.14	1804.04	2785.85	2707.88
18294	174.305	197.689	309.879	280.16
66361	583.97	544.39	906.116	869.006
545725	106.355	124.177	178.973	183.378
109093	699.188	689.428	1074.86	1113.51
77604	393.909	438.095	663.735	643.859
13836	1218.16	1281.5	1990.18	1886.75
56535	284.599	327.826	466.353	494.101
12457	905.005	876.19	1460.42	1342.73
56741	227.482	246.366	368.173	389.168
226419	839.026	902.018	1375.54	1374.31
24001	43.33	28.809	36.8173	67.2384
67269	604.65	635.784	1025.77	997.37
11303	415.574	389.418	643.281	622.465
229731	63.0254	49.6706	86.9299	92.7075
68366	99.462	84.44	145.224	142.627
70238	538.67	573.199	882.594	860.856
11684	36.4366	45.697	62.385	66.2197
54409	24.6193	22.8485	40.9082	34.638
69635	947.351	948.709	1487.01	1483.32
108797	48.2538	46.6904	65.4531	83.5387
101489	414.589	393.391	629.986	637.746
67880	115.218	119.209	188.178	180.321
328789	18.7107	14.9012	19.4314	19.3565
108689	306.264	282.129	460.217	457.425
320267	3338.38	3191.83	5147.27	5108.08
27052	148.701	158.946	260.79	244.503
56176	182.183	144.045	273.062	246.541
232431	320.051	321.866	464.308	543.001
22756	46.2843	56.6245	73.6347	87.6137
69737	312.173	291.07	504.193	437.05
102632483	347.624	340.74	527.715	553.189
100273	1097.04	1136.46	1733.48	1717.64
66464	434.284	444.055	682.144	698.872
18612	1894.7	1773.24	2958.68	2780.21
29807	165.442	158.946	249.54	262.841
56693	919.777	895.064	1451.22	1394.69
626802	530.792	499.686	767.028	834.368
68817	858.721	901.025	1324.4	1422.19
219103	313.157	277.162	460.217	453.35
225372	118.173	116.229	198.405	181.34
68212	191.046	180.801	297.607	292.385
68617	904.021	851.354	1405.2	1337.64
94190	53.1777	50.664	76.7028	69.276
70891	49.2386	43.7101	64.4304	70.2947
67609	664.721	640.751	1040.09	1063.59
381591	5267.54	4831.96	7900.39	7847.54
21815	2370.35	2324.58	3581.51	3681.81
243833	26.5888	46.6904	48.0671	66.2197
118568297	25.6041	28.809	36.8173	46.8632
22634	171.35	171.86	265.903	254.691
76467	80.7513	92.3873	123.747	145.683
219134	96.5076	88.4137	145.224	142.627
432516	39.3909	34.7694	63.4077	48.9007
100041677	2065.07	2111	3307.43	3231.52
207565	214.68	230.472	365.105	320.911
229681	66.9645	64.5718	109.429	96.7826
76413	6.8934	7.9473	11.2497	12.2252
140630	632.224	550.35	950.092	950.507
71787	489.432	437.101	705.666	719.248
56174	153.624	162.92	234.199	262.841
24084	22.6498	22.8485	36.8173	32.6005
69470	292.477	243.386	410.104	417.693
72745	446.102	495.713	766.005	759.998
20720	451.026	439.088	717.938	666.272
100504116	35.4518	30.7958	51.1352	51.957
104806	840.01	796.717	1262.02	1265.31
67544	135.899	133.117	208.632	207.828
56075	269.828	264.248	394.764	425.843
433791	856.752	802.677	1343.83	1225.57
74007	219.604	221.531	313.97	353.511
19106	725.777	778.835	1062.59	1143.05
114715	1191.57	1164.28	1802	1834.79
13821	576.092	620.883	889.753	966.807
67563	251.117	238.419	400.9	341.286
56632	169.381	159.939	306.811	224.128
100039123	654.873	683.468	982.819	891.419
54204	1752.89	1810.99	2754.14	2731.31
66904	430.345	446.042	671.917	685.628
16164	60.0711	67.552	105.339	91.6888
67254	213.696	232.458	336.47	355.549
269401	624.345	590.087	938.842	966.807
24074	1681.99	1744.43	2599.71	2692.59
20832	433.3	449.022	712.825	665.253
22352	1320.58	1350.05	2040.29	2096.62
76976	258.995	234.445	399.877	365.736
231147	142.792	126.163	236.245	196.621
75530	28.5584	26.8221	48.0671	31.5817
104346	139.838	128.15	183.064	170.134
20336	2017.8	2014.64	3032.32	3180.58
11717	188.091	166.893	280.221	266.916
83486	1089.16	992.419	1608.71	1668.74
218232	113.249	105.302	164.655	176.246
76138	227.482	263.254	383.514	369.811
53618	274.751	307.958	407.036	399.356
20677	360.427	410.279	618.736	567.452
19244	3762.81	3709.4	5643.28	5844.65
112694759	9.84772	15.8946	22.4995	17.319
546143	63.0254	76.4927	114.543	101.876
192657	723.807	757.973	1127.02	1153.24
73233	163.472	154.972	243.404	250.616
66926	968.031	1005.33	1471.67	1560.75
118453	42.3452	40.7299	55.226	68.2572
14853	144.761	149.012	226.018	227.184
78797	549.503	606.975	880.548	901.606
230162	113.249	138.084	205.564	184.396
69713	323.005	330.806	521.579	531.795
59048	88.6295	96.361	148.292	137.533
71492	132.944	129.144	198.405	197.64
619331	64.0102	81.4598	111.475	112.064
20230	182.183	182.788	268.971	294.423
74998	111.279	98.3478	152.383	169.115
69772	202.863	211.597	329.311	314.798
18685	300.355	277.162	424.422	413.618
279561	744.488	820.558	1156.68	1235.76
17190	419.513	428.161	593.168	607.183
73390	18.7107	18.8748	26.5903	31.5817
94088	2573.21	2537.17	3907.75	3956.88
19366	1403.3	1376.87	2003.48	2076.24
210853	29.5432	29.8024	46.0217	45.8444
16599	740.548	736.118	1122.93	1131.85
22648	70.9036	67.552	111.475	99.8389
16790	608.589	653.665	902.025	1025.9
71340	559.35	506.64	784.414	843.537
12336	4135.06	4174.32	6291.68	6506.85
16149	89.6142	72.5191	125.793	126.327
170765	16.7411	23.8419	28.6357	33.6192
268491	880.386	941.755	1322.36	1400.8
12190	1963.64	1850.73	2830.85	2979.89
224697	122.112	119.209	162.61	182.359
100037283	235.36	275.175	418.286	387.13
77117	123.096	124.177	185.109	194.584
102633750	413.604	357.628	557.374	619.409
544848	513.066	527.502	756.801	748.792
75616	953.259	1017.25	1527.92	1491.47
320982	149.685	188.748	276.13	241.447
78405	22.6498	25.8287	36.8173	32.6005
50878	1460.42	1542.77	2277.56	2301.39
68017	126.051	142.058	208.632	202.734
22193	560.335	564.258	788.505	891.419
229211	782.894	819.565	1160.77	1249
666532	1674.11	1640.12	2519.94	2491.9
320701	67.9493	66.5586	117.611	91.6888
240332	58.1015	88.4137	98.1796	100.858
77219	570.183	606.975	909.184	885.306
70640	2559.42	2560.02	3943.55	3839.72
20357	207.787	244.379	376.355	305.629
328133	508.142	444.055	708.734	723.323
66869	449.056	414.253	661.69	666.272
17330	558.366	529.489	811.004	845.574
320376	242.254	258.287	362.037	396.299
270201	94.5381	83.4466	137.042	134.477
229603	900.082	860.295	1327.47	1345.79
17181	39.3909	38.7431	55.226	64.1821
19055	401.787	373.523	564.533	611.259
102639653	151.655	200.669	216.813	274.048
68023	173.32	166.893	260.79	258.766
105670	197.939	235.439	420.331	375.924
22276	83.7056	87.4203	114.543	117.158
56791	36.4366	39.7365	63.4077	53.9945
66712	22.6498	33.776	46.0217	39.7318
26363	78.7818	70.5323	114.543	104.933
100044193	500.264	509.62	795.664	736.567
13039	4704.26	4717.71	7208.02	7177.19
68514	152.64	151.992	227.04	236.353
234413	1548.06	1494.09	2325.63	2292.22
23807	2228.54	2281.87	3373.9	3457.69
13544	420.498	426.174	672.939	633.671
56357	399.817	419.22	633.054	608.202
21679	252.102	243.386	457.762	443.774
381406	159.533	180.801	250.563	265.897
101055987	90.599	106.295	142.156	157.908
270198	75.8274	81.4598	128.861	115.12
93679	257.025	252.327	370.219	385.093
384569	76.8122	101.328	123.747	144.665
77805	689.34	653.665	1031.91	997.37
214345	200.893	181.794	276.13	295.442
668923	174.305	172.854	263.858	261.822
70470	575.107	603.995	895.889	902.625
26886	610.559	685.454	1034.98	931.15
79202	272.782	281.136	433.627	424.825
26436	442.163	421.207	625.895	680.534
69277	559.35	596.047	820.209	846.593
219131	22.6498	29.8024	39.8855	43.8069
20181	169.381	133.117	216.813	232.278
107566	1067.49	965.597	1518.72	1569.92
78914	117.188	124.177	184.087	181.34
56264	248.163	227.491	344.651	374.905
77411	111.279	98.3478	149.315	163.002
68328	74.8427	88.4137	106.361	142.627
58245	187.107	195.702	272.039	254.691
100041574	328.914	284.116	412.15	485.951
66383	360.427	364.582	532.829	543.001
58801	821.3	965.597	1334.63	1365.14
71881	313.157	269.215	436.695	431.956
225467	660.782	705.323	1077.93	983.107
70153	139.838	147.025	198.405	234.316
73610	209.756	219.544	323.175	305.629
71752	2298.46	2220.28	3358.56	3451.57
67053	335.807	376.503	556.351	519.57
235956	395.878	362.595	590.1	553.189
74374	982.802	968.577	1401.1	1466
76108	302.325	292.063	410.104	484.932
19411	1550.03	1614.29	2331.77	2409.38
21871	521.929	514.587	782.369	777.317
56294	194	206.63	256.699	346.38
67311	282.63	288.09	441.808	422.787
208628	1991.21	1942.12	2886.07	2869.86
69068	15.7564	13.9078	29.6584	15.2815
13805	285.584	275.175	433.627	409.543
100504263	180.213	188.748	300.675	255.71
66302	33.4822	36.7562	48.0671	58.0696
12527	3784.48	3866.36	6892.21	7016.03
241447	587.909	558.298	809.982	909.756
18986	3798.27	3980.6	7824.71	8228.56
70681	304.295	283.122	442.831	471.688
207352	1077.34	1065.93	1451.22	1563.8
218885	557.381	606.975	856.003	894.475
16002	155.594	174.841	234.199	261.822
225288	255.056	261.267	376.355	396.299
231915	1536.24	1493.1	2198.81	2294.26
382423	804.559	812.611	1199.63	1224.55
66994	266.873	265.241	425.445	374.905
99730	552.457	526.508	796.687	832.33
18632	427.391	452.996	586.009	579.677
76932	450.041	405.312	667.826	611.259
66226	294.447	290.076	463.285	416.675
227541	500.264	553.331	919.206	1001.24
102093	977.879	969.57	1345.88	1368.2
236930	920.762	878.176	1342.81	1347.83
106021	1865.16	1816.95	2731.64	2771.04
100043915	837.056	758.967	1175.09	1170.56
67785	1727.29	1637.14	2451.42	2583.59
68544	401.787	439.088	652.485	623.484
14652	19.6954	16.888	21.4768	33.6192
69663	477.614	484.785	712.825	724.341
66826	231.421	273.188	361.015	401.393
71904	33.4822	38.7431	64.4304	42.7881
70574	64.9949	72.5191	107.384	95.7638
68140	193.015	186.761	284.312	283.216
67345	2423.52	2263.99	3434.24	3641.06
319604	1005.45	974.537	1479.85	1486.38
80911	160.518	185.768	251.585	269.973
242687	1754.86	1707.68	2619.15	2725.19
229906	549.503	471.871	761.915	774.261
232906	1501.78	1448.39	2179.38	2243.32
20148	25.6041	29.8024	43.9763	35.6567
14423	1232.93	1225.87	1815.3	1850.08
22380	535.716	553.331	841.686	782.411
14874	302.325	323.852	445.899	492.063
382090	307.249	310.938	441.808	470.669
22151	394.894	438.095	624.872	622.465
70408	588.894	570.219	897.934	828.255
75712	45.2995	45.697	61.3622	77.4261
29815	390.954	371.536	524.647	518.551
243308	116.203	94.3742	162.61	150.777
68567	96.5076	108.282	142.156	166.059
67839	107.34	119.209	174.882	140.589
69863	1550.03	1560.65	2271.43	2348.25
13110	38.4061	43.7101	59.3168	63.1634
75572	24.6193	36.7562	49.0898	43.8069
11898	6112.48	6308.17	9174.68	9377.72
80385	174.305	188.748	273.062	268.954
109077	608.589	620.883	908.161	919.944
105245382	57.1168	47.6838	71.5893	83.5387
108909	549.503	569.225	822.254	839.462
77583	110.294	126.163	182.041	182.359
22646	259.98	274.182	397.832	399.356
233887	496.325	499.686	770.096	711.097
16976	1043.86	1091.76	1624.05	1548.52
545893	14.7716	15.8946	21.4768	24.4503
230157	2202.93	2143.78	3216.4	3242.73
246179	533.746	486.772	759.869	755.923
53313	722.823	669.56	1210.06	1271.42
216119	109.31	112.256	149.315	177.265
59012	28.5584	36.7562	47.0444	49.9194
66880	931.594	992.419	1568.83	1563.8
213556	207.787	202.656	290.448	303.592
100038347	22.6498	37.7497	41.9309	47.8819
246257	196.954	190.735	294.539	280.16
74182	452.01	452.996	688.28	665.253
115486519	656.843	604.988	899.98	964.77
51813	752.366	776.848	1135.2	1238.82
50760	107.34	115.236	155.451	159.946
68552	536.701	595.054	841.686	826.218
21848	2315.2	2242.13	3356.51	3470.93
57434	306.264	346.701	492.943	472.707
97086	112.264	105.302	164.655	177.265
66789	142.792	134.111	203.518	206.809
259302	140.822	138.084	200.45	211.903
14082	48.2538	35.7628	68.5212	56.032
102058	148.701	164.906	244.426	219.034
71707	228.467	236.432	343.629	343.324
13872	1058.63	1125.54	1629.17	1598.44
66663	570.183	587.107	834.527	878.175
252876	316.112	302.991	447.944	428.9
11752	79.7665	91.3939	120.679	132.439
217734	353.533	336.767	514.42	504.288
79555	1048.78	1086.79	1536.1	1618.82
66072	389.97	409.286	586.009	593.94
56219	164.457	180.801	262.835	250.616
226090	1815.92	1809	2607.9	2732.33
238328	207.787	201.663	299.652	299.517
193043	46.2843	58.6113	88.9753	66.2197
12675	1668.2	1639.13	2378.81	2488.84
78796	539.655	563.265	695.439	748.792
224674	219.604	217.557	316.016	295.442
22249	670.63	626.843	902.025	972.92
53885	225.513	253.32	363.06	345.361
13663	2065.07	1980.86	2970.96	3003.32
14104	7762.96	7108.86	11232.4	10678.7
435684	40.3756	42.7167	60.3395	58.0696
59044	359.442	314.912	463.285	508.363
21924	7.87818	4.96706	7.15893	12.2252
13649	69.9188	73.5125	107.384	120.214
12192	827.208	799.697	1167.93	1226.59
16009	295.432	305.971	451.013	433.994
67045	1561.85	1586.48	2292.9	2336.03
108153	106.355	86.4269	138.065	144.665
67117	299.371	287.096	426.468	437.05
235907	322.02	310.938	477.603	456.406
11443	69.9188	62.585	83.8617	110.027
29877	129.99	159.939	183.064	240.428
234549	1795.24	1898.41	2627.33	2796.51
66753	423.452	449.022	563.51	586.808
68922	28.5584	18.8748	33.7492	35.6567
112422	2397.92	2374.26	3612.19	3426.1
209760	314.142	290.076	437.717	447.237
66606	361.411	388.424	542.033	566.433
13026	347.624	345.707	503.17	511.42
17762	172.335	170.867	344.856	264.064
30841	1707.59	1698.73	2382.9	2522.46
67733	155.594	200.669	288.403	249.597
381933	7.87818	10.9275	9.20434	17.319
231655	20.6802	23.8419	28.6357	35.6567
244962	507.158	483.792	751.688	702.947
67226	776.985	752.013	1043.16	1102.3
71778	96.5076	113.249	159.542	153.833
18973	2577.15	2478.56	3676.62	3701.17
20312	35.4518	42.7167	59.3168	55.0133
56386	1289.07	1234.81	1848.03	1775.71
72661	8.86295	14.9012	20.4541	13.2439
12916	148.701	139.078	194.314	174.209
54169	4520.1	4318.36	6187.36	6585.29
22284	10367.7	10356.3	14864	15340.6
14231	26.5888	37.7497	38.8628	56.032
11782	108.325	114.242	163.633	153.833
70696	30.5279	18.8748	33.7492	38.713
58230	293.462	278.155	435.672	401.393
72391	59.0863	61.5916	86.9299	86.595
207921	49.2386	57.6179	69.5439	89.6513
78834	203.848	225.505	296.584	327.023
65112	152.64	148.018	214.768	226.166
16431	310.203	336.767	490.898	457.425
103199	1336.34	1293.42	1948.25	1889.81
100043403	428.376	442.068	626.918	641.821
15201	8338.06	8214.53	12205	12147.7
74781	1630.78	1498.07	2298.02	2271.84
74277	269.828	299.017	436.695	394.262
71069	214.68	181.794	311.925	268.954
73836	396.863	414.253	617.713	607.183
20523	85.6752	68.5454	101.248	121.233
106583	1312.7	1281.5	1864.39	1912.22
93757	40.3756	43.7101	63.4077	60.1071
317717	232.406	258.287	353.856	353.511
52023	268.843	248.353	357.946	373.886
27224	827.208	907.979	1232.36	1291.79
242466	1450.57	1454.36	2063.82	2121.07
68310	1253.61	1310.31	1822.46	1860.26
626848	191.046	215.57	312.947	348.417
71934	414.589	450.016	644.304	616.352
225182	533.746	554.324	773.164	795.655
26465	776	794.73	1129.07	1160.37
170776	58.1015	60.5981	97.1569	78.4448
94186	1358.99	1382.83	1921.66	2091.52
70024	2577.15	2456.71	3549.81	3767.39
212377	1031.06	1026.19	1487.01	1552.6
58207	99.462	119.209	172.837	149.758
76539	347.624	358.622	522.602	524.664
328108	899.097	843.407	1277.36	1257.16
72181	365.35	306.964	498.057	482.894
213332	122.112	130.137	185.109	186.434
226251	151.655	149.012	246.676	276.289
232371	37.4213	31.7892	55.226	45.8444
12227	965.076	951.689	1362.24	1423.21
20377	1010.38	1074.87	1551.44	1475.17
12814	77.797	73.5125	99.2023	90.67
15205	178.244	179.808	257.721	262.841
108168114	15.7564	17.8814	25.5676	24.4503
407823	626.315	636.777	923.502	909.756
57390	59.0863	43.7101	79.7709	88.6325
67210	961.137	1004.34	1385.76	1471.1
320209	757.29	785.789	1122.93	1158.33
52440	2555.48	2515.32	3736.96	3622.73
73166	135.899	150.999	209.654	208.847
23942	2521.02	2590.82	3650.03	3729.7
20540	775.015	726.184	1020.66	934.207
320394	1453.52	1482.17	2192.68	2045.68
66684	797.665	758.967	1144.41	1116.57
71147	119.157	110.269	175.905	155.871
214254	112.264	89.4071	132.952	159.946
239122	300.355	294.05	457.149	406.487
94094	22.6498	29.8024	40.9082	34.638
18439	154.609	143.051	190.223	205.79
21648	2936.59	2914.67	4269.79	4358.27
27057	3222.17	3079.58	4585.81	4563.04
74330	568.213	573.199	843.731	797.692
72672	1321.56	1232.82	1789.73	1905.09
68778	169.381	162.92	235.222	242.466
230967	335.807	354.648	497.034	494.101
66291	188.091	195.702	289.425	278.123
232236	246.193	314.912	400.9	393.243
69632	1078.33	1002.35	1469.63	1528.15
71151	436.254	470.877	664.758	654.047
108937	789.787	821.552	1097.36	1209.27
68259	604.65	616.909	882.594	883.269
72472	144.761	136.097	220.904	174.209
106707	150.67	121.196	198.405	178.284
240095	171.35	178.814	332.583	306.852
56542	259.98	296.037	419.309	381.018
432628	37.4213	40.7299	51.1352	63.1634
100434	1892.73	1926.23	3243.61	3291.02
75607	73.8579	75.4993	101.248	119.195
109552	277.706	334.78	422.377	463.538
67180	764.183	778.835	1143.38	1088.04
237860	446.102	406.306	589.078	630.615
100503353	168.396	167.887	251.585	233.297
212986	165.442	136.097	228.063	232.278
67993	174.305	171.86	251.585	247.56
58243	15.7564	23.8419	29.6584	27.5066
264134	318.081	326.833	466.353	461.5
100317	154.609	181.794	253.631	234.316
77106	433.3	467.897	598.282	617.371
83815	443.147	380.477	601.35	565.414
17979	4367.46	4189.22	6066.68	6255.21
230709	820.315	827.512	1168.95	1205.2
212898	1282.17	1212.96	1727.35	1796.08
115490184	225.513	219.544	297.607	344.342
74666	60.0711	53.6443	74.6574	87.6137
70355	146.731	156.959	239.313	215.978
68073	64.0102	87.4203	70.5666	82.5199
75894	459.888	462.93	648.394	691.741
69256	514.051	506.64	728.165	731.473
17524	568.213	550.35	767.028	845.574
59079	518.975	511.607	704.643	778.336
72195	360.427	370.543	525.67	527.72
234740	699.188	703.336	1001.23	1025.9
252972	269.828	258.287	388.628	350.455
71902	3657.44	3739.2	5191.25	5434.09
217718	869.554	847.381	1197.59	1273.46
14609	1519.5	1355.01	2066.89	2129.22
73373	216.65	216.564	322.152	301.554
69606	168.396	177.821	248.517	250.616
67456	1446.63	1387.8	2008.59	1995.76
18950	2194.07	2105.04	3109.02	3072.59
58809	60.0711	51.6574	82.839	78.4448
67246	2280.73	2199.41	3208.22	3211.14
223776	63.0254	74.5059	81.8163	116.139
212167	61.0559	47.6838	72.612	77.4261
18793	173.32	195.702	283.289	252.654
53332	245.208	219.544	330.333	341.286
19210	784.863	735.125	1106.57	1076.83
210126	502.234	452.003	650.44	712.116
11647	1552.99	1581.51	2300.06	2195.44
246198	2443.22	2348.43	3387.2	3476.02
68744	2645.1	2705.06	3757.42	3839.72
23908	689.34	721.217	991	1007.56
73442	130.975	147.025	206.586	199.678
77035	41.3604	48.6772	60.3395	69.276
67121	1031.06	1001.36	1448.15	1444.61
240064	542.609	536.443	708.734	734.529
12193	577.076	612.935	798.732	907.719
54711	306.264	322.859	456.126	444.181
214489	191.046	222.524	285.334	307.667
18861	471.706	485.779	659.644	707.022
69554	581.015	577.172	830.436	834.368
12572	1167.94	1037.12	1544.28	1608.63
68295	488.447	468.891	671.917	679.516
380601	358.457	325.839	489.875	487.988
216011	106.355	115.236	155.451	172.171
622675	194	198.682	275.107	293.404
434178	1389.51	1339.12	1867.46	2042.62
73666	1161.05	1113.62	1633.26	1631.04
19691	496.325	508.627	684.189	677.478
235631	45.2995	69.5389	95.1115	71.3135
80517	309.218	321.866	451.013	450.294
68350	205.817	194.709	287.38	285.254
17423	142.792	150.005	194.314	224.128
67789	296.416	320.872	381.469	376.943
93684	2404.81	2271.93	3495.6	3231.52
18193	4203.01	4018.35	5658.62	5974.03
68094	472.691	497.699	666.803	688.685
19365	129.99	121.196	171.814	173.19
16476	51.2081	40.7299	65.4531	66.2197
225898	356.487	335.773	508.284	479.838
76775	690.325	663.599	943.956	1001.45
252875	355.503	388.424	526.693	544.02
100042165	500.264	502.667	701.575	716.191
68642	158.548	151.992	224.995	216.997
67936	924.701	819.565	1265.09	1239.84
18424	310.203	264.248	438.74	390.187
14772	50.2234	45.697	77.7255	59.0883
668225	151.655	126.163	194.314	197.64
76987	352.548	390.411	512.375	534.851
74107	2477.69	2506.38	3594.81	3485.19
66074	1011.36	1071.89	1514.62	1451.74
78755	1204.38	1249.71	1644.51	1622.89
211006	408.68	406.306	601.35	560.32
23856	1532.31	1490.12	2362.45	2367.61
65020	1301.87	1291.44	1802	1875.54
54384	947.351	999.373	1402.13	1372.28
20741	165.442	115.236	204.541	194.584
68043	193.015	224.511	303.743	300.535
233895	521.929	515.581	725.097	707.022
18720	763.198	773.868	1066.68	1049.33
12321	4971.13	4796.19	6921.66	7014.19
227154	176.274	199.676	276.13	260.804
78752	230.437	265.241	326.243	376.943
230868	35.4518	33.776	62.5895	52.5682
72982	251.117	211.597	303.743	359.624
107373	859.706	899.038	1267.13	1237.8
667692	53.1777	206.63	6.13622	363.699
23853	183.168	183.781	267.948	255.71
140780	194	144.045	233.177	263.86
52163	96.5076	103.315	144.201	141.608
75425	1000.53	950.695	1397.01	1379.41
628147	661.767	595.054	826.345	908.738
230935	1544.12	1458.33	2155.86	2097.64
18438	90.599	71.5257	124.77	107.989
320435	258.995	285.109	401.923	372.868
118568645	989.696	934.801	1428.72	1300.96
76858	33.4822	36.7562	52.1579	46.8632
68040	211.726	217.557	294.539	316.836
57342	115.218	106.295	143.179	170.134
378435	34.467	35.7628	61.3622	38.713
353499	87.6447	73.5125	114.543	115.12
54645	281.645	221.531	359.992	351.474
72404	243.239	244.379	326.243	364.718
118567987	65.9797	62.585	80.7936	99.8389
242406	484.508	479.818	695.439	671.366
14366	105.371	92.3873	116.588	143.646
66757	199.909	202.656	292.493	255.71
225028	1046.81	1031.16	1380.65	1531.2
15903	71.8883	89.4071	109.429	122.252
72020	730.701	757.973	1014.52	1091.1
26564	162.487	168.88	243.404	226.166
66309	287.553	276.169	418.286	409.543
24071	512.081	488.759	684.189	710.079
77286	451.026	449.022	625.895	648.953
105244402	90.599	87.4203	118.634	128.364
67120	1703.66	1762.31	2190.63	2237.21
74437	96.5076	88.4137	129.883	135.496
11792	2424.51	2484.52	3546.74	3460.74
107733	234.376	223.518	308.857	341.286
76273	484.508	564.258	741.461	747.773
18519	1266.42	1246.73	1764.16	1786.91
433904	78.7818	111.262	145.224	124.289
118451	1400.35	1300.38	1833.71	1985.57
94185	197.939	162.92	261.812	249.597
241066	135.899	104.308	162.61	177.265
333789	1929.17	1878.54	2646.76	2740.48
192651	109.31	102.321	172.837	155.871
67230	236.345	289.083	374.31	411.581
20410	124.081	122.19	157.496	185.415
208076	37.4213	29.8024	44.999	52.9757
408068	158.548	135.104	202.495	210.884
101543	188.091	226.498	310.902	277.104
20496	682.447	624.856	911.229	932.169
75202	97.4924	120.203	170.792	159.946
76630	72.8731	64.5718	85.9071	109.008
66105	5852.5	5701.19	8499.69	8509.74
243771	191.046	211.597	262.835	305.629
52575	750.396	772.875	1101.45	1058.5
101602	132.944	128.15	183.064	178.284
269997	158.548	140.071	214.768	207.828
104009	193.015	189.742	256.699	232.278
12400	1552.99	1514.95	2162	2169.97
50918	1208.32	1212.96	1726.32	1680.96
216739	164.457	158.946	224.995	246.541
225160	986.741	1088.78	1518.72	1485.36
27219	45.2995	53.6443	58.2941	82.5199
110557	124.081	148.018	202.495	181.34
102635360	161.503	166.893	234.199	228.203
66439	39.3909	32.7826	38.8628	63.1634
67391	582	594.06	849.867	809.918
67610	515.036	562.271	731.233	775.28
18590	320.051	305.971	446.922	421.768
13860	359.442	370.543	528.738	479.838
100604	86.6599	113.249	152.383	133.458
118568416	104.386	89.4071	129.883	143.646
170787	60.0711	65.5652	100.225	76.4073
28028	991.665	998.379	1355.08	1455.81
216274	403.756	422.2	596.237	566.433
109815	330.883	343.721	492.943	465.575
109232	626.315	664.593	914.298	911.794
20773	1393.45	1456.34	1951.32	2055.87
67467	837.056	845.394	1189.4	1175.65
140858	4583.13	4557.77	6309.06	6566.95
226153	520.944	532.469	689.303	696.835
20438	511.097	517.568	726.12	731.473
56550	2525.94	2430.88	3475.15	3508.62
230673	357.472	318.885	481.694	468.632
73919	26.5888	22.8485	39.8855	33.6192
218341	79.7665	63.5784	109.429	94.7451
52040	766.153	701.349	1053.39	1030.99
77644	499.279	488.759	689.303	697.853
66374	170.366	148.018	214.768	234.316
269800	544.579	564.258	788.505	784.448
100515	1275.28	1326.21	1794.85	1850.08
16956	340.731	364.582	522.602	481.875
11677	5258.68	5124.02	7439.15	7223.04
72123	66.9645	57.6179	92.0434	82.5199
69860	854.782	841.42	1118.84	1267.34
69151	575.107	583.133	808.959	745.735
22037	1961.67	1949.07	2719.37	2810.77
18718	265.888	309.945	412.15	391.205
13384	96.5076	77.4861	101.248	143.646
67469	225.513	205.636	287.38	318.873
103844	25.6041	18.8748	27.613	32.6005
100978	573.137	538.429	784.414	783.43
66885	760.244	799.697	1123.95	1062.57
76497	329.899	325.839	436.695	485.951
231086	1091.13	1026.19	1493.15	1488.41
74569	279.675	235.439	372.264	370.83
216853	395.878	407.299	579.873	545.039
216858	46.2843	44.7035	74.6574	52.9757
16499	79.7665	94.3742	103.293	140.589
272636	329.899	296.037	517.897	518.347
381066	287.553	296.037	389.65	419.731
654795	181.198	156.959	244.426	258.766
54667	786.833	731.151	1039.07	1081.93
50505	247.178	247.36	354.878	335.173
72947	89.6142	73.5125	123.747	100.858
56309	369.289	407.299	551.238	538.926
56336	742.518	728.171	1028.84	1023.86
105246	426.406	458.956	575.782	598.015
240063	160.518	165.9	234.199	227.184
109242	285.584	280.142	399.877	408.524
68473	197.939	199.676	294.539	260.804
67878	1015.3	1026.19	1370.42	1462.95
230810	312.173	331.8	444.876	435.012
50496	376.183	360.609	541.01	502.251
13713	129.99	107.289	197.586	195.603
54326	194	212.59	278.176	289.329
76890	873.493	938.774	1161.79	1104.34
67118	572.152	523.528	700.552	667.291
72699	181.198	148.018	237.267	223.109
208982	89.6142	100.335	163.633	136.514
67922	926.67	892.084	1320.31	1216.4
69938	90.599	78.4796	122.724	114.102
20218	2781.98	2803.41	3891.39	3891.68
67489	220.589	275.175	302.72	344.342
20843	1993.18	1995.77	2738.8	2769
72925	220.589	224.511	296.584	312.761
105827	39.3909	49.6706	58.2941	59.0883
17299	233.391	246.366	398.855	361.661
432940	206.802	194.709	280.221	282.198
330188	22.6498	32.7826	40.9082	33.6192
72567	5021.35	4841.89	6858.25	7011.14
66131	3308.83	3446.15	4702.39	4791.25
219181	1564.8	1507.01	2073.02	2194.42
227292	243.239	258.287	338.515	355.549
218335	729.716	770.888	1010.43	1079.89
18988	274.751	265.241	462.671	435.216
100170401	410.65	417.233	552.26	579.677
319996	827.208	864.269	1114.75	1210.29
74102	138.853	115.236	187.155	165.04
15242	84.6904	72.5191	95.1115	124.289
77877	594.802	618.896	849.867	881.231
27397	759.259	753.006	1055.43	1042.2
67266	134.914	147.025	208.632	184.396
67988	1213.24	1321.24	1761.1	1756.35
102182	578.061	517.568	763.96	780.373
20194	880.386	961.623	1348.95	1273.46
22247	2027.65	2190.47	2894.25	2952.38
78785	191.046	214.577	280.221	256.729
208111	531.777	524.522	708.734	756.942
218699	326.944	308.951	406.014	438.069
69227	2379.21	2541.15	3375.95	3450.55
17156	793.726	775.855	1109.63	1063.59
105501	894.173	881.157	1185.31	1276.51
76561	80.7513	81.4598	104.316	121.233
194952	359.442	369.549	423.4	456.406
18554	212.711	191.729	283.289	296.46
242642	92.5686	80.4664	109.429	131.421
23922	274.751	274.182	402.945	364.718
228136	1103.93	1071.89	1461.44	1547.5
20020	6761.44	6681.69	8694.01	9891.18
434234	234.376	246.366	316.016	317.854
66229	3763.8	3748.14	5158.52	5252.75
69792	458.904	422.2	637.145	594.958
27416	2474.73	2445.78	3454.69	3468.89
74777	142.792	122.19	178.973	187.453
242585	255.056	241.399	338.515	338.23
19230	1848.42	1882.52	2527.1	2636.56
19290	1444.66	1489.12	1953.36	1998.82
225651	75.8274	57.6179	87.9526	97.8014
71675	397.848	372.53	562.487	555.226
77853	1185.67	1156.33	1570.87	1660.59
225339	570.183	543.396	736.347	805.842
20319	129.005	118.216	181.019	161.984
93692	278.69	264.248	380.446	374.905
93760	3078.4	2977.26	4193.09	4146.37
13480	446.102	450.016	608.509	632.653
227615	16.7411	27.8155	31.7038	30.5629
224904	501.249	558.298	754.756	735.548
231999	780.924	722.211	978.728	1099.25
328092	215.665	196.696	278.176	301.554
14426	102.416	84.44	139.906	169.93
65961	1066.51	1086.79	1416.45	1568.9
17318	2605.71	2773.61	3890.37	3751.09
70791	432.315	462.93	610.554	585.789
239188	343.685	319.879	473.512	443.162
79264	686.386	677.507	890.775	935.226
668525	943.411	916.919	1290.65	1289.76
71643	621.391	624.856	933.729	890.4
26965	1803.12	1844.77	2463.69	2503.1
108168101	1023.18	1009.31	1403.15	1404.88
12286	367.32	359.615	508.284	476.782
665211	782.894	751.02	1003.27	1135.92
14658	38.4061	50.664	59.3168	62.1446
19895	116.203	155.966	179.996	195.603
66091	306.264	343.721	505.216	472.707
72776	267.858	267.228	432.604	367.774
56277	161.503	155.966	230.108	199.678
72881	279.675	283.122	388.628	371.849
50493	4707.21	4789.24	6477.81	6571.03
74741	1658.36	1556.68	2102.68	2277.96
212285	308.234	283.122	413.172	394.262
100270744	48.2538	40.7299	59.3168	63.1634
228859	95.5229	86.4269	126.815	124.289
71916	150.67	149.012	206.586	206.809
242362	382.091	390.411	527.715	531.795
79464	1045.83	1099.71	1474.74	1471.1
59288	767.137	758.967	1058.5	1046.27
210148	321.036	356.635	463.285	456.406
217869	6725.01	6833.68	9093.89	9480.62
97998	706.081	691.415	964.41	958.657
70052	1565.79	1527.87	2020.86	2191.36
67072	1367.85	1492.11	1918.59	1922.41
80744	1616.01	1514.95	2106.77	2209.7
628308	627.3	584.126	808.959	839.462
116940	1179.76	1103.68	1572.92	1550.56
50907	887.279	890.097	1150.54	1235.76
218035	2069.99	1992.78	2773.57	2781.23
13404	239.3	261.267	331.356	354.53
100041273	282.63	256.3	412.15	360.643
381204	30.5279	38.7431	51.1352	43.8069
27221	1883.87	1962.98	2629.37	2633.51
20619	1060.6	1093.75	1476.78	1489.43
63959	4366.48	4094.84	5749.64	5680.63
208869	164.457	190.735	228.063	255.71
30838	58.1015	65.5652	79.7709	91.6888
227522	154.609	145.038	203.518	200.697
66611	93.5533	86.4269	136.02	111.045
216049	405.726	411.273	571.692	544.02
271005	23.6345	26.8221	42.9536	31.5817
67064	426.406	419.22	599.305	557.264
66865	2731.76	2636.52	3585.6	3736.83
83997	1431.86	1498.07	1980.98	1995.76
27366	1459.43	1491.11	1837.8	1729.86
225027	4566.39	4503.14	6346.9	6047.38
227738	221.574	229.478	326.243	289.329
75329	225.513	201.663	419.309	400.374
243910	42.3452	42.7167	60.3395	56.032
67103	958.183	955.662	1301.9	1294.85
227867	588.894	600.021	813.05	810.936
17436	791.757	861.288	1120.88	1131.85
74213	3051.81	3204.75	4453.88	4482.56
94223	1155.14	1165.27	1580.08	1583.16
69698	165.442	145.038	215.791	200.697
14312	3243.84	3137.2	4308.65	4361.33
14815	362.396	408.292	484.762	575.602
69727	563.29	576.179	782.369	804.824
14828	8027.86	7994.98	10891.8	10965
13831	318.081	299.017	407.036	392.224
14873	404.741	396.371	547.147	554.208
71927	816.376	864.269	1151.56	1140
12041	888.264	834.466	1182.25	1167.5
13521	372.244	352.661	466.353	521.607
68251	639.117	649.692	913.275	854.743
70348	71.8883	74.5059	102.27	97.8014
103266	546.548	565.252	736.347	777.317
22183	483.523	506.64	653.508	693.778
70237	766.153	798.703	1079.98	1049.33
54427	4910.07	4894.54	6535.08	6880.73
224170	687.371	733.138	1004.3	1005.52
56403	6559.57	6486.98	8148.91	8180.68
77744	814.406	811.618	1069.75	1091.1
15199	507.158	487.765	699.53	667.291
217069	2781.98	2745.79	3717.53	3786.75
66595	179.228	162.92	228.063	229.222
15251	2529.88	2388.16	3258.34	3397.58
100048658	276.721	320.872	423.4	448.256
11416	265.888	238.419	331.356	356.567
14257	60.0711	64.5718	93.0661	76.4073
66320	340.731	342.727	419.309	492.063
170763	190.061	165.9	250.563	233.297
74270	139.838	117.223	185.109	164.021
16573	4267.02	4110.74	5619.76	5742.77
60534	323.99	290.076	408.059	418.712
21339	240.284	251.333	327.265	339.248
217449	378.152	347.694	486.807	496.138
65113	1548.06	1540.78	2073.02	2135.33
239796	322.02	325.839	416.241	464.556
68014	2733.73	2714	3658.21	3740.9
140488	1311.72	1358.99	1741.67	1881.66
13171	1110.82	1215.94	1580.08	1597.42
27392	481.553	457.963	633.054	636.728
109801	4355.65	4672.02	5777.26	6119.72
240174	979.848	920.893	1327.47	1351.9
72736	914.853	976.524	1287.58	1280.59
12450	5414.28	5586.95	7483.13	7423.73
244631	528.823	486.772	689.303	687.666
97064	946.366	968.577	1276.33	1303
208836	1198.47	1085.8	1534.06	1543.43
233410	507.158	567.238	730.211	722.304
241950	101.432	74.5059	129.883	111.045
74140	498.295	503.66	681.121	701.929
68277	220.589	174.841	260.79	275.066
18679	304.295	307.958	396.809	428.9
212974	197.939	206.63	284.312	260.804
68347	52.1929	60.5981	79.7709	75.3886
68988	1762.74	1720.59	2343.02	2369.65
72480	72.8731	71.5257	97.1569	97.8014
83703	682.447	670.553	949.069	879.194
268294	324.975	318.885	421.354	428.9
240614	318.081	328.819	430.558	443.162
211389	178.244	193.715	256.699	246.541
214505	118.173	117.223	169.769	172.171
624866	49.2386	46.6904	55.226	66.2197
22685	175.289	151.992	228.063	214.959
85031	98.4772	82.4532	120.679	126.327
68099	392.924	460.943	600.327	550.133
74446	424.437	502.667	613.622	638.765
226548	841.98	797.71	1079.98	1128.79
118567384	47.2691	63.5784	77.7255	75.3886
19819	367.32	321.866	457.149	478.819
215090	84.6904	94.3742	117.611	143.646
71887	429.361	404.319	574.76	556.245
18631	249.147	254.314	336.47	338.23
242553	223.543	190.735	271.017	287.292
22192	779.939	841.42	1050.32	1026.91
244886	14.7716	18.8748	29.6584	15.2815
75735	174.305	169.873	219.881	233.297
56643	248.163	241.399	375.537	416.878
20692	4400.95	4249.82	5744.53	5937.36
66311	138.853	167.887	194.314	202.734
219132	567.229	587.107	959.706	910.775
328971	34.467	41.7233	46.0217	47.8819
353208	196.954	209.61	276.13	243.485
17692	187.107	164.906	237.267	233.297
58521	249.147	254.314	355.901	322.948
192195	646.995	628.83	840.663	793.617
209018	469.736	441.075	539.988	590.883
243911	190.061	183.781	258.744	243.485
76357	446.102	460.943	613.622	577.639
232854	87.6447	93.3807	108.407	135.496
[truncated: 10,042 more rows]
