# Supplementary material for: ZFP560 facilitates KAP1-dependent chromatin repression to regulate exit from totipotency
Source: Research Square preprint supplement (doi:10.21203/rs.3.rs-7290036/v1), 2025-08-25
Supplement: Supplementary file 9 [file bd327380b195f18398dc1868.xlsx]

## Sheet: Gene signatures
Gene signatures
Gene	gene_set	Gene	gene_set	Gene	gene_set
ABCA13	8CLC	A1BGAS	8-morula	AADAT	ESC
ABCA17P	8CLC	ABCA17P	8-morula	AAMP	ESC
ABCF2	8CLC	ABCC5	8-morula	AARS	ESC
ACE	8CLC	ABCF2	8-morula	AASDHPPT	ESC
ACER2	8CLC	ABHD14B	8-morula	AASS	ESC
ACOT11	8CLC	ABHD15	8-morula	ABCB10	ESC
ACSBG1	8CLC	ABT1	8-morula	ABHD10	ESC
ADAP2	8CLC	ACBD5	8-morula	ABHD12	ESC
AHCTF1	8CLC	ACER2	8-morula	ABHD4	ESC
ANKRD37	8CLC	ACOT11	8-morula	ABHD5	ESC
AP4B1	8CLC	ACRC	8-morula	ABI2	ESC
ARF6	8CLC	ACSS2	8-morula	ACAA2	ESC
ARGFX	8CLC	ACTR5	8-morula	ACADM	ESC
ARHGAP11A	8CLC	ADAP2	8-morula	ACADVL	ESC
ARHGAP5	8CLC	ADM	8-morula	ACAP1	ESC
ARL11	8CLC	AFMID	8-morula	ACBD6	ESC
ARL4D	8CLC	AFTPH	8-morula	ACO1	ESC
ARL8B	8CLC	AHCTF1	8-morula	ACOT7	ESC
ARSD	8CLC	AK7	8-morula	ACOT8	ESC
ATG12	8CLC	AKAP8	8-morula	ACP2	ESC
ATG2A	8CLC	AKT1S1	8-morula	ACP6	ESC
ATG3	8CLC	AKT3	8-morula	ACTA1	ESC
ATG9B	8CLC	ALG2	8-morula	ACTB	ESC
ATP6V1E1	8CLC	ALPPL2	8-morula	ACTC1	ESC
ATP8B1	8CLC	ALX1	8-morula	ACTN1	ESC
ATP9B	8CLC	AMD1	8-morula	ACTR1A	ESC
AVPI1	8CLC	AMZ2P1	8-morula	ACTR1B	ESC
B4GALNT2	8CLC	ANAPC13	8-morula	ACTR8	ESC
BAG5	8CLC	ANKRD20A1	8-morula	ACY1	ESC
BATF3	8CLC	ANKRD20A4	8-morula	ADAMTS1	ESC
BCDIN3D	8CLC	ANKRD20B	8-morula	ADAMTS19	ESC
BCL2L11	8CLC	ANKRD30A	8-morula	ADCK1	ESC
BCYRN1	8CLC	ANKRD35	8-morula	ADCK4	ESC
BHMT	8CLC	ANKRD36	8-morula	ADCY2	ESC
BIK	8CLC	ANKRD36B	8-morula	ADD2	ESC
BNIP2	8CLC	ANKRD50	8-morula	ADH5	ESC
BRDT	8CLC	ANKRD54	8-morula	ADSL	ESC
BRMS1L	8CLC	ANKZF1	8-morula	AEN	ESC
BTG3	8CLC	ANO4	8-morula	AES	ESC
BTK	8CLC	AP1G1	8-morula	AFP	ESC
BYSL	8CLC	AP4M1	8-morula	AGBL5	ESC
C12orf60	8CLC	APOB48R	8-morula	AGPAT5	ESC
C15orf39	8CLC	ARF6	8-morula	AGPS	ESC
C15orf41	8CLC	ARGFX	8-morula	AGTPBP1	ESC
C16orf70	8CLC	ARHGAP11B	8-morula	AGTRAP	ESC
C16orf72	8CLC	ARHGAP21	8-morula	AHCYL1	ESC
C17orf51	8CLC	ARHGAP5	8-morula	AHSA2	ESC
C17orf80	8CLC	ARL17B	8-morula	AIDA	ESC
C18orf25	8CLC	ARL4D	8-morula	AIFM2	ESC
C19orf47	8CLC	ARL8B	8-morula	AIG1	ESC
C19orf48	8CLC	ARL9	8-morula	AK2	ESC
C21orf91	8CLC	ARMC7	8-morula	AK3	ESC
C22orf46	8CLC	ARPC5L	8-morula	AKIRIN1	ESC
C2orf16	8CLC	ARR3	8-morula	AKR1A1	ESC
C2orf49	8CLC	ARRDC2	8-morula	AKR1B1	ESC
C3	8CLC	ASB7	8-morula	ALCAM	ESC
C8orf33	8CLC	ASCC1	8-morula	ALDH16A1	ESC
C9orf64	8CLC	ASTN2	8-morula	ALDH18A1	ESC
CCDC126	8CLC	ATAD2	8-morula	ALDH1B1	ESC
CCDC142	8CLC	ATF3	8-morula	ALDH2	ESC
CCDC144B	8CLC	ATF4	8-morula	ALDH3A2	ESC
CCDC144NL	8CLC	ATG12	8-morula	ALDH4A1	ESC
CCDC86	8CLC	ATG13	8-morula	ALDH7A1	ESC
CCK	8CLC	ATG14	8-morula	ALDOC	ESC
CCNA1	8CLC	ATG16L1	8-morula	ALG3	ESC
CCNDBP1	8CLC	ATG2A	8-morula	ALG8	ESC
CCNE1	8CLC	ATG3	8-morula	ALKBH7	ESC
CD3EAP	8CLC	ATG4A	8-morula	ALKBH8	ESC
CDAN1	8CLC	ATG5	8-morula	ALPL	ESC
CDC20	8CLC	ATG9A	8-morula	ALS2CR4	ESC
CDC25B	8CLC	ATG9B	8-morula	AMDHD2	ESC
CDKN1A	8CLC	ATP1B2	8-morula	AMOTL2	ESC
CEACAM22P	8CLC	ATP6V1E1	8-morula	AMT	ESC
CENPA	8CLC	AVL9	8-morula	ANAPC11	ESC
CEP350	8CLC	AVPI1	8-morula	ANAPC16	ESC
CEP97	8CLC	B9D2	8-morula	ANAPC5	ESC
CES1	8CLC	BAG4	8-morula	ANGEL2	ESC
CFL2	8CLC	BAGE	8-morula	ANGPT1	ESC
CHD1	8CLC	BAGE4	8-morula	ANKLE1	ESC
CILP	8CLC	BAGE5	8-morula	ANKRD11	ESC
CITED1	8CLC	BAIAP2L2	8-morula	ANKRD18A	ESC
CLEC2L	8CLC	BAK1	8-morula	ANKRD28	ESC
CLK4	8CLC	BAMBI	8-morula	ANKRD33B	ESC
CLPTM1L	8CLC	BATF2	8-morula	ANKRD57	ESC
CNPY4	8CLC	BATF3	8-morula	ANKS3	ESC
COMP	8CLC	BBS5	8-morula	ANP32A	ESC
CORO1A	8CLC	BCL2L11	8-morula	ANP32E	ESC
COX6B2	8CLC	BCL8	8-morula	ANTXR1	ESC
CRHBP	8CLC	BCOR	8-morula	ANXA1	ESC
CRY2	8CLC	BDP1	8-morula	ANXA4	ESC
CST1	8CLC	BHMT	8-morula	ANXA5	ESC
CTNNBL1	8CLC	BIK	8-morula	ANXA9	ESC
CTSB	8CLC	BNIP2	8-morula	AP1G2	ESC
CUL2	8CLC	BRDT	8-morula	AP1S2	ESC
D2HGDH	8CLC	BRF2	8-morula	AP2M1	ESC
DBF4B	8CLC	BRMS1L	8-morula	AP3D1	ESC
DBR1	8CLC	BTAF1	8-morula	AP3S2	ESC
DCLRE1B	8CLC	BTG1	8-morula	AP4S1	ESC
DCTN5	8CLC	BTG3	8-morula	APBB1	ESC
DDX21	8CLC	BTN1A1	8-morula	APEH	ESC
DDX31	8CLC	BYSL	8-morula	APEX1	ESC
DDX3X	8CLC	BZW1	8-morula	APIP	ESC
DDX49	8CLC	C10orf2	8-morula	APOA1BP	ESC
DDX53	8CLC	C10orf28	8-morula	APOBEC3C	ESC
DHDH	8CLC	C11orf48	8-morula	APOE	ESC
DLEU7	8CLC	C11orf82	8-morula	APRT	ESC
DLL3	8CLC	C11orf85	8-morula	ARAF	ESC
DLL4	8CLC	C11orf86	8-morula	ARF4	ESC
DMBX1	8CLC	C12orf23	8-morula	ARF5	ESC
DNAJB1	8CLC	C12orf35	8-morula	ARFGAP1	ESC
DNAJB4	8CLC	C12orf43	8-morula	ARFIP2	ESC
DNAJB9	8CLC	C12orf44	8-morula	ARFRP1	ESC
DNAJC15	8CLC	C12orf47	8-morula	ARHGAP22	ESC
DPRX	8CLC	C12orf49	8-morula	ARHGEF10	ESC
DPY19L2P2	8CLC	C12orf50	8-morula	ARHGEF19	ESC
DQX1	8CLC	C12orf60	8-morula	ARHGEF35	ESC
DR1	8CLC	C13orf31	8-morula	ARHGEF5	ESC
DRAM1	8CLC	C14orf109	8-morula	ARID3A	ESC
DRG1	8CLC	C14orf118	8-morula	ARL16	ESC
DUXA	8CLC	C14orf119	8-morula	ARL2	ESC
DYNLL2	8CLC	C14orf128	8-morula	ARL6IP4	ESC
DYNLT3	8CLC	C14orf138	8-morula	ARL6IP5	ESC
EBNA1BP2	8CLC	C14orf142	8-morula	ARL6IP6	ESC
EID3	8CLC	C14orf21	8-morula	ARMC6	ESC
EIF1AD	8CLC	C15orf39	8-morula	ARMCX1	ESC
EIF3J	8CLC	C15orf41	8-morula	ARMCX2	ESC
EIF4A3	8CLC	C16orf61	8-morula	ARMCX3	ESC
ELL	8CLC	C16orf72	8-morula	ARMCX6	ESC
EML6	8CLC	C16orf80	8-morula	ARPC1A	ESC
EXOSC6	8CLC	C16orf91	8-morula	ARPC3	ESC
F11R	8CLC	C17orf100	8-morula	ARRB2	ESC
F2RL1	8CLC	C17orf103	8-morula	ARRDC1	ESC
FAM122C	8CLC	C17orf42	8-morula	ARRDC3	ESC
FAM126B	8CLC	C17orf44	8-morula	ARSE	ESC
FAM13B	8CLC	C17orf59	8-morula	ASAM	ESC
FAM151A	8CLC	C17orf88	8-morula	ASGR1	ESC
FAM162B	8CLC	C17orf96	8-morula	ASH2L	ESC
FAM19A3	8CLC	C18orf34	8-morula	ASMTL	ESC
FAM27C	8CLC	C19orf18	8-morula	ASNS	ESC
FAM50B	8CLC	C19orf38	8-morula	ASPHD1	ESC
FASTKD5	8CLC	C19orf43	8-morula	ASPSCR1	ESC
FBXL20	8CLC	C19orf47	8-morula	ASS1	ESC
FBXL3	8CLC	C19orf48	8-morula	ATAD3A	ESC
FBXO31	8CLC	C19orf51	8-morula	ATCAY	ESC
FBXO6	8CLC	C19orf53	8-morula	ATG4B	ESC
FKBPL	8CLC	C19orf73	8-morula	ATIC	ESC
FOXE1	8CLC	C1D	8-morula	ATOX1	ESC
FOXI3	8CLC	C1GALT1	8-morula	ATP11C	ESC
FOXR1	8CLC	C1orf100	8-morula	ATP5A1	ESC
FRAT2	8CLC	C1orf107	8-morula	ATP5B	ESC
FRG1	8CLC	C1orf156	8-morula	ATP5C1	ESC
FRG2C	8CLC	C1orf161	8-morula	ATP5D	ESC
FRMD4B	8CLC	C1orf162	8-morula	ATP5E	ESC
FRMD8	8CLC	C1orf216	8-morula	ATP5EP2	ESC
FUNDC1	8CLC	C1orf38	8-morula	ATP5G1	ESC
FYTTD1	8CLC	C1orf58	8-morula	ATP5G2	ESC
GABARAPL1	8CLC	C1orf63	8-morula	ATP5G3	ESC
GABRQ	8CLC	C1orf64	8-morula	ATP5H	ESC
GAGE2A	8CLC	C1orf77	8-morula	ATP5J	ESC
GAR1	8CLC	C1orf83	8-morula	ATP5J2	ESC
GATA6	8CLC	C1orf96	8-morula	ATP5L	ESC
GBA3	8CLC	C1QBP	8-morula	ATP5O	ESC
GBX2	8CLC	C20orf111	8-morula	ATP6AP2	ESC
GCK	8CLC	C20orf191	8-morula	ATP6V0A2	ESC
GDPD1	8CLC	C20orf4	8-morula	ATP6V1A	ESC
GEMIN6	8CLC	C20orf43	8-morula	ATP6V1C2	ESC
GEMIN8P4	8CLC	C21orf119	8-morula	ATPAF1	ESC
GINS3	8CLC	C21orf81	8-morula	ATPBD4	ESC
GIP	8CLC	C21orf91	8-morula	ATRIP	ESC
GPCPD1	8CLC	C22orf23	8-morula	ATXN10	ESC
GPR37L1	8CLC	C22orf34	8-morula	ATXN7L3	ESC
GPR50	8CLC	C2orf42	8-morula	AURKAIP1	ESC
GRPEL1	8CLC	C2orf49	8-morula	AUTS2	ESC
GTF2A1	8CLC	C2orf51	8-morula	AXIN2	ESC
GTF2A2	8CLC	C2orf69	8-morula	AXL	ESC
HAT1	8CLC	C3	8-morula	B2M	ESC
HBA1	8CLC	C3orf34	8-morula	B3GAT3	ESC
HES2	8CLC	C3orf75	8-morula	B3GNT1	ESC
HIST1H2AA	8CLC	C4orf49	8-morula	B3GNT7	ESC
HIST1H2AC	8CLC	C5orf27	8-morula	B3GNTL1	ESC
HIST1H2AG	8CLC	C5orf28	8-morula	B4GALNT4	ESC
HIST1H2AL	8CLC	C6orf114	8-morula	B4GALT4	ESC
HIST1H2BC	8CLC	C6orf147	8-morula	B4GALT7	ESC
HIST1H2BD	8CLC	C6orf204	8-morula	B9D1	ESC
HIST1H2BE	8CLC	C7orf40	8-morula	BAD	ESC
HIST1H2BH	8CLC	C7orf58	8-morula	BAG2	ESC
HIST1H2BJ	8CLC	C7orf64	8-morula	BAHD1	ESC
HIST1H2BN	8CLC	C8orf33	8-morula	BAT1	ESC
HIST1H2BO	8CLC	C8orf41	8-morula	BAX	ESC
HIST1H3A	8CLC	C9orf21	8-morula	BAZ2B	ESC
HIST1H3C	8CLC	C9orf40	8-morula	BBX	ESC
HIST1H3D	8CLC	CAB39L	8-morula	BCAS4	ESC
HIST1H3H	8CLC	CABP7	8-morula	BCAT2	ESC
HIST1H4H	8CLC	CACNB3	8-morula	BCKDHB	ESC
HIST2H2AA4	8CLC	CASC5	8-morula	BCKDK	ESC
HIST2H2BF	8CLC	CBLN1	8-morula	BCL11A	ESC
HK2	8CLC	CCDC103	8-morula	BCL7C	ESC
HOXA1	8CLC	CCDC115	8-morula	BEND4	ESC
HSPA2	8CLC	CCDC12	8-morula	BEND5	ESC
IER3	8CLC	CCDC144B	8-morula	BET1	ESC
IFIT5	8CLC	CCDC144C	8-morula	BEX1	ESC
IMP4	8CLC	CCDC150	8-morula	BEX2	ESC
IMPDH1	8CLC	CCDC46	8-morula	BEX4	ESC
IPP	8CLC	CCDC75	8-morula	BEX5	ESC
IPPK	8CLC	CCDC86	8-morula	BGLAP	ESC
ISG20L2	8CLC	CCDC89	8-morula	BID	ESC
ITGAL	8CLC	CCK	8-morula	BLOC1S1	ESC
ITGAX	8CLC	CCL14-CCL15	8-morula	BLOC1S2	ESC
ITGB1BP2	8CLC	CCL15	8-morula	BLVRA	ESC
JAGN1	8CLC	CCNA1	8-morula	BMP2	ESC
JRKL	8CLC	CCNB1	8-morula	BMP4	ESC
KBTBD6	8CLC	CCNE1	8-morula	BOK	ESC
KCNV2	8CLC	CCNE2	8-morula	BOLA3	ESC
KHDC1L	8CLC	CCNT1	8-morula	BOP1	ESC
KITLG	8CLC	CCRN4L	8-morula	BPHL	ESC
KLF16	8CLC	CDAN1	8-morula	BRD3	ESC
KLF17	8CLC	CDC20	8-morula	BRE	ESC
KLHL21	8CLC	CDC23	8-morula	BRP44	ESC
KLK15	8CLC	CDC25B	8-morula	BST2	ESC
KPTN	8CLC	CDC26	8-morula	BTBD3	ESC
KTI12	8CLC	CDC42EP1	8-morula	BTD	ESC
LAMA3	8CLC	CDC42EP2	8-morula	BTG2	ESC
LARP1B	8CLC	CDC6	8-morula	BTN2A1	ESC
LARP4	8CLC	CDIPT	8-morula	C10orf32	ESC
LEUTX	8CLC	CDK1	8-morula	C10orf57	ESC
LGALS4	8CLC	CDK17	8-morula	C10orf96	ESC
LHX6	8CLC	CDK5R1	8-morula	C11orf1	ESC
LIN54	8CLC	CDKN2AIP	8-morula	C11orf10	ESC
LLPH	8CLC	CDKN2D	8-morula	C11orf31	ESC
LMBR1L	8CLC	CDR1	8-morula	C11orf54	ESC
LONRF3	8CLC	CDR2	8-morula	C11orf58	ESC
LRP4	8CLC	CDS2	8-morula	C11orf59	ESC
LRRC57	8CLC	CDT1	8-morula	C11orf68	ESC
LUZP1	8CLC	CDV3	8-morula	C11orf73	ESC
LYSMD1	8CLC	CELA3A	8-morula	C11orf95	ESC
MAGEB1	8CLC	CEP55	8-morula	C12orf10	ESC
MAGEB2	8CLC	CEP97	8-morula	C12orf11	ESC
MAP3K13	8CLC	CETN2	8-morula	C12orf24	ESC
MAPK1	8CLC	CFD	8-morula	C12orf26	ESC
MAST2	8CLC	CFL2	8-morula	C12orf32	ESC
MBD3L2	8CLC	CHD1	8-morula	C12orf45	ESC
MBD3L3	8CLC	CHMP1A	8-morula	C12orf52	ESC
MBD3L5	8CLC	CHMP5	8-morula	C12orf57	ESC
MDM2	8CLC	CHRNA10	8-morula	C12orf73	ESC
MED7	8CLC	CHRNB1	8-morula	C13orf38	ESC
MED9	8CLC	CIDECP	8-morula	C14orf1	ESC
MFN1	8CLC	CKAP2L	8-morula	C14orf101	ESC
MFSD11	8CLC	CLC	8-morula	C14orf104	ESC
MKRN3	8CLC	CLK4	8-morula	C14orf115	ESC
MLF1	8CLC	CLN5	8-morula	C14orf126	ESC
MORC3	8CLC	CLP1	8-morula	C14orf132	ESC
MOSPD1	8CLC	CLPB	8-morula	C14orf156	ESC
MPP5	8CLC	CLPP	8-morula	C14orf179	ESC
MRPS23	8CLC	CNKSR3	8-morula	C15orf29	ESC
MT1A	8CLC	CNPY4	8-morula	C16orf13	ESC
MYC	8CLC	CNTLN	8-morula	C16orf45	ESC
MYLK3	8CLC	COPS2	8-morula	C16orf48	ESC
MYO5A	8CLC	CORO1A	8-morula	C16orf59	ESC
NANOGNB	8CLC	COX19	8-morula	C16orf75	ESC
NAP1L5	8CLC	COX6B2	8-morula	C17orf37	ESC
NBAS	8CLC	CPSF7	8-morula	C17orf58	ESC
NBPF9	8CLC	CREG1	8-morula	C17orf75	ESC
NEU1	8CLC	CREM	8-morula	C17orf90	ESC
NF2	8CLC	CRHBP	8-morula	C17orf95	ESC
NFKBIL1	8CLC	CRIPT	8-morula	C18orf10	ESC
NIP7	8CLC	CRNDE	8-morula	C18orf55	ESC
NKIRAS1	8CLC	CRP	8-morula	C19orf56	ESC
NKX2-5	8CLC	CRSP8P	8-morula	C19orf6	ESC
NMNAT1	8CLC	CRYGC	8-morula	C19orf62	ESC
NMT2	8CLC	CSAG1	8-morula	C19orf63	ESC
NMUR2	8CLC	CSNK1A1L	8-morula	C19orf66	ESC
NOL6	8CLC	CSNK1D	8-morula	C19orf70	ESC
NOL9	8CLC	CSRNP1	8-morula	C19orf77	ESC
NOLC1	8CLC	CSTA	8-morula	C1orf104	ESC
NPPC	8CLC	CT47B1	8-morula	C1orf106	ESC
NPTX2	8CLC	CTCF	8-morula	C1orf109	ESC
NR0B1	8CLC	CTNNBL1	8-morula	C1orf112	ESC
NR4A2	8CLC	CTSL2	8-morula	C1orf115	ESC
NSUN4	8CLC	CUL2	8-morula	C1orf151	ESC
NUDT4	8CLC	CWC15	8-morula	C1orf182	ESC
NUP153	8CLC	CXCL14	8-morula	C1orf187	ESC
NUPR1	8CLC	CXorf27	8-morula	C1orf198	ESC
NUSAP1	8CLC	CXorf40A	8-morula	C1orf21	ESC
NXT1	8CLC	CXorf40B	8-morula	C1orf27	ESC
OSBPL6	8CLC	CXorf49	8-morula	C1orf35	ESC
OTUD6A	8CLC	CXorf49B	8-morula	C1orf54	ESC
OVOL1	8CLC	CXorf61	8-morula	C1orf57	ESC
OXSM	8CLC	CYTH3	8-morula	C1orf85	ESC
OXSR1	8CLC	DAGLB	8-morula	C1orf86	ESC
PAGE2B	8CLC	DAP3	8-morula	C1orf91	ESC
PAGE4	8CLC	DAZAP2	8-morula	C1orf93	ESC
PCBP4	8CLC	DBF4B	8-morula	C20orf108	ESC
PCDHGA12	8CLC	DBP	8-morula	C20orf11	ESC
PDCD2L	8CLC	DBR1	8-morula	C20orf27	ESC
PDCL3	8CLC	DCLRE1B	8-morula	C20orf3	ESC
PDE12	8CLC	DCTN5	8-morula	C20orf7	ESC
PDP2	8CLC	DDI2	8-morula	C21orf33	ESC
PGBD2	8CLC	DDIT3	8-morula	C21orf58	ESC
PGF	8CLC	DDX11L2	8-morula	C21orf70	ESC
PHLDA2	8CLC	DDX20	8-morula	C21orf88	ESC
PHLDB3	8CLC	DDX26B	8-morula	C22orf25	ESC
PHOSPHO1	8CLC	DDX31	8-morula	C22orf28	ESC
PIGH	8CLC	DDX39	8-morula	C22orf32	ESC
PIK3CB	8CLC	DDX3X	8-morula	C22orf36	ESC
PIK3R4	8CLC	DDX3Y	8-morula	C22orf39	ESC
PIM1	8CLC	DDX49	8-morula	C2orf18	ESC
PKN2	8CLC	DDX5	8-morula	C2orf28	ESC
PLA2G15	8CLC	DEF6	8-morula	C2orf43	ESC
PLIN3	8CLC	DGAT2	8-morula	C2orf47	ESC
PLK1	8CLC	DGCR14	8-morula	C2orf64	ESC
PLLP	8CLC	DHDH	8-morula	C2orf74	ESC
PLSCR4	8CLC	DHODH	8-morula	C3orf1	ESC
PLXNB3	8CLC	DHX8	8-morula	C3orf10	ESC
PNMA1	8CLC	DIABLO	8-morula	C3orf26	ESC
PNO1	8CLC	DIS3	8-morula	C3orf39	ESC
POLDIP3	8CLC	DIS3L	8-morula	C3orf45	ESC
POLH	8CLC	DLEU7	8-morula	C3orf58	ESC
POLR3C	8CLC	DLK2	8-morula	C3orf78	ESC
POLR3H	8CLC	DLX2	8-morula	C4orf3	ESC
POLR3K	8CLC	DLX5	8-morula	C4orf43	ESC
POMC	8CLC	DLX6	8-morula	C4orf52	ESC
POTEF	8CLC	DNAH12	8-morula	C5orf13	ESC
PPARGC1B	8CLC	DNAH7	8-morula	C5orf15	ESC
PPP1R15B	8CLC	DNAJB1	8-morula	C5orf30	ESC
PPTC7	8CLC	DNAJB12	8-morula	C5orf35	ESC
PQLC1	8CLC	DNAJB14	8-morula	C5orf44	ESC
PRAF2	8CLC	DNAJB4	8-morula	C5orf62	ESC
PRAME	8CLC	DNAJB9	8-morula	C6orf108	ESC
PRAMEF1	8CLC	DNASE2	8-morula	C6orf115	ESC
PRAMEF10	8CLC	DNTTIP2	8-morula	C6orf125	ESC
PRAMEF11	8CLC	DOK4	8-morula	C6orf192	ESC
PRAMEF12	8CLC	DPH3	8-morula	C6orf225	ESC
PRAMEF14	8CLC	DPRX	8-morula	C6orf226	ESC
PRAMEF15	8CLC	DPY19L2P2	8-morula	C6orf62	ESC
PRAMEF17	8CLC	DR1	8-morula	C7orf16	ESC
PRAMEF18	8CLC	DRAM1	8-morula	C7orf36	ESC
PRAMEF19	8CLC	DRG1	8-morula	C7orf46	ESC
PRAMEF2	8CLC	DUSP12	8-morula	C7orf50	ESC
PRAMEF20	8CLC	DUXA	8-morula	C7orf55	ESC
PRAMEF5	8CLC	DYNC1LI1	8-morula	C7orf59	ESC
PRAMEF6	8CLC	DYNLL2	8-morula	C8orf38	ESC
PRAMEF8	8CLC	E2F6	8-morula	C8orf42	ESC
PRKAA1	8CLC	E4F1	8-morula	C8orf58	ESC
PRKAG1	8CLC	EDA	8-morula	C8orf59	ESC
PRKD2	8CLC	EDC3	8-morula	C9orf116	ESC
PRPF18	8CLC	EFNA4	8-morula	C9orf119	ESC
PRPH	8CLC	EFNB1	8-morula	C9orf123	ESC
PRPSAP1	8CLC	EFNB3	8-morula	C9orf125	ESC
PRR13	8CLC	EID3	8-morula	C9orf135	ESC
PRR23A	8CLC	EIF1	8-morula	C9orf16	ESC
PRR23B	8CLC	EIF1AD	8-morula	C9orf23	ESC
PRSS41	8CLC	EIF1B	8-morula	C9orf30	ESC
PSPC1	8CLC	EIF3I	8-morula	C9orf37	ESC
PTCD1	8CLC	EIF3J	8-morula	C9orf6	ESC
PTPN2	8CLC	EIF4A3	8-morula	C9orf69	ESC
PUF60	8CLC	EIF5	8-morula	C9orf86	ESC
QRICH2	8CLC	EIF5A2	8-morula	C9orf89	ESC
RAB21	8CLC	ELL	8-morula	CA11	ESC
RAB33B	8CLC	ELL2	8-morula	CA14	ESC
RAB6A	8CLC	ELL3	8-morula	CA4	ESC
RAD51C	8CLC	ELOF1	8-morula	CACHD1	ESC
RB1CC1	8CLC	EML6	8-morula	CAD	ESC
RBM15	8CLC	ENO2	8-morula	CALCA	ESC
RBM44	8CLC	ENSA	8-morula	CALCB	ESC
RBM5	8CLC	EOMES	8-morula	CALD1	ESC
RBM8A	8CLC	EPC2	8-morula	CALR	ESC
RBMXL3	8CLC	EPHX4	8-morula	CAMKV	ESC
RBP7	8CLC	EPM2AIP1	8-morula	CAND1	ESC
RCL1	8CLC	ETV3	8-morula	CANX	ESC
RDH10	8CLC	EXOSC6	8-morula	CAP1	ESC
RELB	8CLC	EYA3	8-morula	CAPG	ESC
REM1	8CLC	F11R	8-morula	CAPN1	ESC
REM2	8CLC	F2RL1	8-morula	CAPNS1	ESC
REV3L	8CLC	FA2H	8-morula	CAPZA2	ESC
REXO4	8CLC	FAF2	8-morula	CAPZB	ESC
RFK	8CLC	FAM105A	8-morula	CARD10	ESC
RFPL1	8CLC	FAM109B	8-morula	CARHSP1	ESC
RFPL2	8CLC	FAM113B	8-morula	CARM1	ESC
RFPL4A	8CLC	FAM117B	8-morula	CARS2	ESC
RFPL4B	8CLC	FAM119A	8-morula	CASP3	ESC
RGS10	8CLC	FAM122C	8-morula	CAT	ESC
RHEBL1	8CLC	FAM151A	8-morula	CAV1	ESC
RHOXF2B	8CLC	FAM162B	8-morula	CAV2	ESC
RLIM	8CLC	FAM166A	8-morula	CBL	ESC
RMND1	8CLC	FAM177A1	8-morula	CBLB	ESC
RNF11	8CLC	FAM179B	8-morula	CBLC	ESC
RNF113B	8CLC	FAM19A3	8-morula	CBR1	ESC
RNF115	8CLC	FAM200A	8-morula	CBR4	ESC
RNF125	8CLC	FAM32A	8-morula	CBS	ESC
RNF168	8CLC	FAM43A	8-morula	CBWD1	ESC
RPA4	8CLC	FAM53B	8-morula	CBWD2	ESC
RPF2	8CLC	FAM53C	8-morula	CBWD3	ESC
RPGRIP1	8CLC	FAM58A	8-morula	CBWD5	ESC
RPL10L	8CLC	FAM89A	8-morula	CBWD6	ESC
RPL32P3	8CLC	FAM9A	8-morula	CBX2	ESC
RPLP0P2	8CLC	FAM9B	8-morula	CBX3	ESC
RPP14	8CLC	FASTKD5	8-morula	CBX6	ESC
RRP12	8CLC	FBXL12	8-morula	CCBL2	ESC
RRP8	8CLC	FBXL3	8-morula	CCDC104	ESC
RRP9	8CLC	FBXO31	8-morula	CCDC134	ESC
SAMD8	8CLC	FBXO33	8-morula	CCDC152	ESC
SARS	8CLC	FBXO5	8-morula	CCDC24	ESC
SATB2	8CLC	FBXO6	8-morula	CCDC28B	ESC
SBNO1	8CLC	FBXW7	8-morula	CCDC51	ESC
SEMA4C	8CLC	FGFR1OP2	8-morula	CCDC56	ESC
SENP5	8CLC	FITM2	8-morula	CCDC58	ESC
SHQ1	8CLC	FKBPL	8-morula	CCDC69	ESC
SIAH1	8CLC	FLJ11235	8-morula	CCDC74A	ESC
SIRT4	8CLC	FLJ25758	8-morula	CCDC74B	ESC
SIX2	8CLC	FLJ39051	8-morula	CCDC84	ESC
SLAIN2	8CLC	FLJ39534	8-morula	CCDC90B	ESC
SLBP	8CLC	FLJ45983	8-morula	CCL26	ESC
SLC11A1	8CLC	FMR1NB	8-morula	CCNC	ESC
SLC12A6	8CLC	FOXD1	8-morula	CCND1	ESC
SLC16A6	8CLC	FOXG1	8-morula	CCNG1	ESC
SLC1A6	8CLC	FOXI3	8-morula	CCNJL	ESC
SLC25A18	8CLC	FOXN2	8-morula	CCNY	ESC
SLC25A19	8CLC	FOXR1	8-morula	CCS	ESC
SLC2A14	8CLC	FRAT2	8-morula	CCT3	ESC
SLC2A3	8CLC	FRG2	8-morula	CCT4	ESC
SLC30A1	8CLC	FRG2B	8-morula	CCT5	ESC
SLC34A2	8CLC	FRG2C	8-morula	CCT6A	ESC
SLC35E4	8CLC	FRS2	8-morula	CCT7	ESC
SLC4A1AP	8CLC	FUNDC1	8-morula	CD200	ESC
SLC6A3	8CLC	FUT3	8-morula	CD24	ESC
SLC6A8	8CLC	FUT4	8-morula	CD276	ESC
SMG1	8CLC	FXC1	8-morula	CD63	ESC
SNAPC2	8CLC	FXR2	8-morula	CD74	ESC
SNAPC4	8CLC	FYTTD1	8-morula	CDC123	ESC
SNF8	8CLC	GABARAPL1	8-morula	CDC14B	ESC
SNUPN	8CLC	GABPA	8-morula	CDC16	ESC
SOAT1	8CLC	GABRQ	8-morula	CDC42EP3	ESC
SOAT2	8CLC	GADD45A	8-morula	CDCA5	ESC
SP1	8CLC	GADD45B	8-morula	CDCA7	ESC
SPATA5L1	8CLC	GAGE12J	8-morula	CDCP1	ESC
SPESP1	8CLC	GAGE2A	8-morula	CDK14	ESC
SPIC	8CLC	GAR1	8-morula	CDK2	ESC
SPRED2	8CLC	GATA6	8-morula	CDK2AP1	ESC
SPRYD3	8CLC	GBA3	8-morula	CDK3	ESC
SRFBP1	8CLC	GBP5	8-morula	CDK5RAP3	ESC
SRSF8	8CLC	GBX2	8-morula	CDK9	ESC
SSX3	8CLC	GCFC1	8-morula	CDKN1B	ESC
STAM	8CLC	GDPD1	8-morula	CDKN2AIPNL	ESC
STYX	8CLC	GEMIN8P4	8-morula	CDO1	ESC
SUPT7L	8CLC	GINS3	8-morula	CDRT4	ESC
SURF6	8CLC	GIP	8-morula	CEBPZ	ESC
SYNGR4	8CLC	GLS	8-morula	CECR1	ESC
TAF12	8CLC	GLUL	8-morula	CECR2	ESC
TAF13	8CLC	GNAI3	8-morula	CECR5	ESC
TAF5	8CLC	GNAL	8-morula	CEND1	ESC
TAF7L	8CLC	GOSR1	8-morula	CENPH	ESC
TAS1R1	8CLC	GOSR2	8-morula	CENPM	ESC
TBC1D13	8CLC	GPATCH3	8-morula	CENPV	ESC
TCHH	8CLC	GPBP1L1	8-morula	CENPW	ESC
TESK2	8CLC	GPR155	8-morula	CER1	ESC
TEX11	8CLC	GPR37L1	8-morula	CERK	ESC
TFAM	8CLC	GPS2	8-morula	CGNL1	ESC
TFAP2C	8CLC	GRAPL	8-morula	CHAC2	ESC
TFB2M	8CLC	GRPEL1	8-morula	CHCHD1	ESC
TFPT	8CLC	GRWD1	8-morula	CHCHD3	ESC
TGS1	8CLC	GTF2A2	8-morula	CHCHD4	ESC
THOC5	8CLC	GTF2E2	8-morula	CHCHD5	ESC
TIGD7	8CLC	GTF3C4	8-morula	CHD1L	ESC
TIMM50	8CLC	GTPBP3	8-morula	CHDH	ESC
TIMM8A	8CLC	GTPBP4	8-morula	CHGB	ESC
TKTL1	8CLC	GUSBP1	8-morula	CHKA	ESC
TMEM167B	8CLC	H1FNT	8-morula	CHKB	ESC
TMEM30A	8CLC	H2AFZ	8-morula	CHML	ESC
TMEM41B	8CLC	H3F3C	8-morula	CHMP2A	ESC
TMEM70	8CLC	HAT1	8-morula	CHMP4A	ESC
TMF1	8CLC	HAUS2	8-morula	CHMP4C	ESC
TNFSF9	8CLC	HAUS3	8-morula	CHMP6	ESC
TOP3A	8CLC	HBEGF	8-morula	CHN1	ESC
TOPORS	8CLC	HCG26	8-morula	CHPF	ESC
TOR1B	8CLC	HDHD3	8-morula	CHST14	ESC
TOX4	8CLC	HEATR3	8-morula	CHST2	ESC
TPPP	8CLC	HECA	8-morula	CHST4	ESC
TPRX1	8CLC	HERC5	8-morula	CHST9	ESC
TRAPPC6B	8CLC	HES2	8-morula	CHTF18	ESC
TRIM29	8CLC	HEXIM1	8-morula	CIAO1	ESC
TRIM43	8CLC	HEXIM2	8-morula	CIB2	ESC
TRIM43B	8CLC	HHLA2	8-morula	CIRBP	ESC
TRIM48	8CLC	HIPK3	8-morula	CISD2	ESC
TRIM49	8CLC	HIST1H1B	8-morula	CISD3	ESC
TRIM60	8CLC	HIST1H1T	8-morula	CKAP4	ESC
TRIM61	8CLC	HIST1H2AA	8-morula	CKB	ESC
TRMT61A	8CLC	HIST1H2AB	8-morula	CKMT1A	ESC
TRPM6	8CLC	HIST1H2AC	8-morula	CKMT1B	ESC
TRPM7	8CLC	HIST1H2AD	8-morula	CLDN7	ESC
TSKS	8CLC	HIST1H2AG	8-morula	CLEC4G	ESC
TSPYL6	8CLC	HIST1H2AI	8-morula	CLIC1	ESC
TTC4	8CLC	HIST1H2AJ	8-morula	CLIC4	ESC
TUBA3C	8CLC	HIST1H2AL	8-morula	CLIP3	ESC
TXNDC11	8CLC	HIST1H2AM	8-morula	CLN6	ESC
UAP1	8CLC	HIST1H2BB	8-morula	CLNS1A	ESC
UBE2S	8CLC	HIST1H2BC	8-morula	CLU	ESC
UBP1	8CLC	HIST1H2BD	8-morula	CMAS	ESC
UBR1	8CLC	HIST1H2BE	8-morula	CMC1	ESC
UBXN1	8CLC	HIST1H2BG	8-morula	CMTM3	ESC
UBXN6	8CLC	HIST1H2BH	8-morula	CMTM7	ESC
ULK2	8CLC	HIST1H2BI	8-morula	CNDP2	ESC
URB1	8CLC	HIST1H2BJ	8-morula	CNIH3	ESC
USP29	8CLC	HIST1H2BK	8-morula	CNIH4	ESC
USP7	8CLC	HIST1H2BL	8-morula	CNN2	ESC
UTP23	8CLC	HIST1H2BO	8-morula	CNO	ESC
VMO1	8CLC	HIST1H3A	8-morula	CNOT1	ESC
VPS37C	8CLC	HIST1H3C	8-morula	CNPY2	ESC
VPS54	8CLC	HIST1H3D	8-morula	CNPY3	ESC
WDR3	8CLC	HIST1H3E	8-morula	CNTNAP2	ESC
WDR43	8CLC	HIST1H3H	8-morula	COG4	ESC
WDR45	8CLC	HIST1H3I	8-morula	COL18A1	ESC
WDR46	8CLC	HIST1H3J	8-morula	COL1A1	ESC
WDR66	8CLC	HIST1H4D	8-morula	COL1A2	ESC
WDR73	8CLC	HIST1H4H	8-morula	COL21A1	ESC
WDR83	8CLC	HIST2H2AA3	8-morula	COL4A2	ESC
WNT10B	8CLC	HIST2H2AA4	8-morula	COL6A1	ESC
YAF2	8CLC	HIST2H2AC	8-morula	COL9A1	ESC
YIPF4	8CLC	HIST2H2BA	8-morula	COL9A3	ESC
YOD1	8CLC	HIST2H2BC	8-morula	COMMD4	ESC
YPEL2	8CLC	HIST2H2BE	8-morula	COMMD5	ESC
YY1	8CLC	HIST2H2BF	8-morula	COMMD7	ESC
ZBTB10	8CLC	HIST2H3D	8-morula	COPZ1	ESC
ZBTB24	8CLC	HK2	8-morula	COQ10A	ESC
ZCCHC8	8CLC	HLA-DRB3	8-morula	COQ2	ESC
ZFAND5	8CLC	HMGN4	8-morula	COQ3	ESC
ZFP28	8CLC	HNRNPCL1	8-morula	COQ5	ESC
ZFYVE19	8CLC	HNRNPU	8-morula	CORO1B	ESC
ZIM3	8CLC	HNRPDL	8-morula	CORO2A	ESC
ZMAT3	8CLC	HOXA1	8-morula	COTL1	ESC
ZMAT5	8CLC	HOXA5	8-morula	COX11	ESC
ZNF100	8CLC	HOXA9	8-morula	COX17	ESC
ZNF107	8CLC	HOXB6	8-morula	COX4I1	ESC
ZNF124	8CLC	HOXB9	8-morula	COX5B	ESC
ZNF134	8CLC	HOXC10	8-morula	COX7A2	ESC
ZNF157	8CLC	HOXC13	8-morula	COX7C	ESC
ZNF211	8CLC	HOXC9	8-morula	COX8A	ESC
ZNF217	8CLC	HOXD1	8-morula	CPE	ESC
ZNF221	8CLC	HOXD11	8-morula	CPNE3	ESC
ZNF230	8CLC	HRASLS5	8-morula	CPNE7	ESC
ZNF256	8CLC	HSP90AB2P	8-morula	CPSF1	ESC
ZNF257	8CLC	HSPA2	8-morula	CPSF3	ESC
ZNF26	8CLC	HYDIN	8-morula	CPT2	ESC
ZNF273	8CLC	ICOSLG	8-morula	CPVL	ESC
ZNF280A	8CLC	IER3	8-morula	CPZ	ESC
ZNF284	8CLC	IER5	8-morula	CRABP1	ESC
ZNF30	8CLC	IFRD1	8-morula	CRABP2	ESC
ZNF324B	8CLC	IFT20	8-morula	CRB3	ESC
ZNF451	8CLC	IKZF5	8-morula	CREB3L4	ESC
ZNF471	8CLC	IL13RA2	8-morula	CRIP2	ESC
ZNF485	8CLC	IL20RB	8-morula	CRIP3	ESC
ZNF493	8CLC	ILF2	8-morula	CRISPLD1	ESC
ZNF506	8CLC	IMP3	8-morula	CRLF1	ESC
ZNF528	8CLC	IMP4	8-morula	CRTAP	ESC
ZNF530	8CLC	IMPDH1	8-morula	CRYBB1	ESC
ZNF534	8CLC	ING2	8-morula	CRYGD	ESC
ZNF557	8CLC	INGX	8-morula	CSDA	ESC
ZNF565	8CLC	INPP5J	8-morula	CSE1L	ESC
ZNF568	8CLC	IRF4	8-morula	CST3	ESC
ZNF576	8CLC	IRGQ	8-morula	CSTF2T	ESC
ZNF578	8CLC	IRX3	8-morula	CTAGE4	ESC
ZNF584	8CLC	IRX5	8-morula	CTAGE9	ESC
ZNF586	8CLC	ISL2	8-morula	CTBP2	ESC
ZNF592	8CLC	ISY1	8-morula	CTGF	ESC
ZNF595	8CLC	ITGA5	8-morula	CTNNAL1	ESC
ZNF596	8CLC	ITPKA	8-morula	CTPS2	ESC
ZNF597	8CLC	JAK2	8-morula	CTSC	ESC
ZNF611	8CLC	KCNK5	8-morula	CTSD	ESC
ZNF639	8CLC	KDM4DL	8-morula	CTTN	ESC
ZNF674	8CLC	KDM5B	8-morula	CUEDC2	ESC
ZNF679	8CLC	KHDC1	8-morula	CUL4A	ESC
ZNF680	8CLC	KHDC1L	8-morula	CUTA	ESC
ZNF681	8CLC	KIAA0020	8-morula	CXCL1	ESC
ZNF7	8CLC	KIAA0802	8-morula	CXCL12	ESC
ZNF707	8CLC	KIAA0907	8-morula	CXCL6	ESC
ZNF735	8CLC	KIAA1191	8-morula	CXCR4	ESC
ZNF749	8CLC	KIAA1310	8-morula	CXorf26	ESC
ZNF764	8CLC	KIAA1430	8-morula	CXXC5	ESC
ZNF778	8CLC	KIAA1919	8-morula	CYB561D2	ESC
ZNF79	8CLC	KIAA2026	8-morula	CYB5R2	ESC
ZNF791	8CLC	KITLG	8-morula	CYC1	ESC
ZNF800	8CLC	KLF10	8-morula	CYorf15A	ESC
ZNF816	8CLC	KLF16	8-morula	CYP1B1	ESC
ZNF823	8CLC	KLF17	8-morula	CYP2S1	ESC
ZNF826P	8CLC	KLF3	8-morula	CYR61	ESC
ZNF829	8CLC	KLF5	8-morula	CYTL1	ESC
ZNF841	8CLC	KLF9	8-morula	CYYR1	ESC
ZNF845	8CLC	KLHL11	8-morula	DACT1	ESC
ZNF876P	8CLC	KLHL15	8-morula	DALRD3	ESC
ZNF878	8CLC	KLK11	8-morula	DAPK1	ESC
ZNF90	8CLC	KPNA2	8-morula	DARS	ESC
ZNFX1	8CLC	KPTN	8-morula	DARS2	ESC
ZNHIT6	8CLC	KRBA2	8-morula	DAZAP1	ESC
ZSCAN4	8CLC	KRT222	8-morula	DBN1	ESC
ZSCAN5A	8CLC	LARP1B	8-morula	DBNDD1	ESC
ZSCAN5B	8CLC	LASS5	8-morula	DBNDD2	ESC
ZZEF1	8CLC	LDHA	8-morula	DCBLD2	ESC
		LENG1	8-morula	DCI	ESC
		LEPR	8-morula	DCLK1	ESC
		LEUTX	8-morula	DCP1B	ESC
		LGALS4	8-morula	DCTD	ESC
		LGMN	8-morula	DCTN2	ESC
		LHB	8-morula	DCTN6	ESC
		LHX2	8-morula	DCTPP1	ESC
		LIAS	8-morula	DCXR	ESC
		LILRA4	8-morula	DDAH2	ESC
		LLPH	8-morula	DDOST	ESC
		LMBR1L	8-morula	DDRGK1	ESC
		LOC100128098	8-morula	DDT	ESC
		LOC100128252	8-morula	DDTL	ESC
		LOC100128822	8-morula	DDX17	ESC
		LOC100129148	8-morula	DDX19B	ESC
		LOC100129250	8-morula	DDX23	ESC
		LOC100132273	8-morula	DDX25	ESC
		LOC100132396	8-morula	DDX46	ESC
		LOC100133957	8-morula	DECR1	ESC
		LOC100134229	8-morula	DEGS1	ESC
		LOC100192204	8-morula	DENND4B	ESC
		LOC146880	8-morula	DENR	ESC
		LOC147804	8-morula	DEPDC1	ESC
		LOC148413	8-morula	DERL2	ESC
		LOC150776	8-morula	DEXI	ESC
		LOC152217	8-morula	DFFA	ESC
		LOC219347	8-morula	DGCR6L	ESC
		LOC220729	8-morula	DHCR24	ESC
		LOC220930	8-morula	DHFR	ESC
		LOC284023	8-morula	DHRS3	ESC
		LOC284232	8-morula	DHRS4	ESC
		LOC285074	8-morula	DHRS4L2	ESC
		LOC285103	8-morula	DHRS7	ESC
		LOC349196	8-morula	DHTKD1	ESC
		LOC387647	8-morula	DHX15	ESC
		LOC401010	8-morula	DHX30	ESC
		LOC439994	8-morula	DHX57	ESC
		LOC440040	8-morula	DIAPH2	ESC
		LOC440563	8-morula	DIDO1	ESC
		LOC493754	8-morula	DIMT1L	ESC
		LOC606724	8-morula	DIXDC1	ESC
		LOC642313	8-morula	DKFZP586I1420	ESC
		LOC643201	8-morula	DLAT	ESC
		LOC643955	8-morula	DLK1	ESC
		LOC644961	8-morula	DLL1	ESC
		LOC645676	8-morula	DMC1	ESC
		LOC646214	8-morula	DMKN	ESC
		LOC649330	8-morula	DNAJA3	ESC
		LOC650226	8-morula	DNAJC10	ESC
		LOC723809	8-morula	DNAJC19	ESC
		LOC728024	8-morula	DNAJC4	ESC
		LOC728752	8-morula	DNALI1	ESC
		LOC729013	8-morula	DNMT3A	ESC
		LOC729513	8-morula	DNMT3B	ESC
		LOC84856	8-morula	DNPEP	ESC
		LOC91948	8-morula	DNTTIP1	ESC
		LOC96610	8-morula	DOLPP1	ESC
		LRRC38	8-morula	DONSON	ESC
		LRRC57	8-morula	DPAGT1	ESC
		LSM10	8-morula	DPCD	ESC
		LST-3TM12	8-morula	DPH1	ESC
		LUC7L2	8-morula	DPH5	ESC
		LUZP4	8-morula	DPM3	ESC
		LYG2	8-morula	DPPA4	ESC
		LZIC	8-morula	DPYSL2	ESC
		MAD2L1BP	8-morula	DPYSL3	ESC
		MAGEA1	8-morula	DPYSL4	ESC
		MAGEA12	8-morula	DSCC1	ESC
		MAGEA2	8-morula	DSE	ESC
		MAGEA2B	8-morula	DSG2	ESC
		MAGEA3	8-morula	DSTN	ESC
		MAGEA4	8-morula	DSTYK	ESC
		MAGEA6	8-morula	DTD1	ESC
		MAGEB2	8-morula	DTWD1	ESC
		MAGEB3	8-morula	DTX3	ESC
		MANEAL	8-morula	DTYMK	ESC
		MAP1LC3B	8-morula	DUS2L	ESC
		MAP1LC3B2	8-morula	DUSP1	ESC
		MAP4K2	8-morula	DUSP2	ESC
		MAPK1	8-morula	DUSP23	ESC
		MAPRE1	8-morula	DUSP6	ESC
		2025-03-08	8-morula	DUT	ESC
		MASP2	8-morula	DYNC1H1	ESC
		MAST2	8-morula	DYNLL1	ESC
		MAST3	8-morula	DYNLRB1	ESC
		MAT2A	8-morula	E2F3	ESC
		MBD1	8-morula	E2F4	ESC
		MBD3L2	8-morula	E2F5	ESC
		MBD3L3	8-morula	EAF2	ESC
		MBD3L4	8-morula	EARS2	ESC
		MBD3L5	8-morula	ECEL1	ESC
		MDM2	8-morula	ECH1	ESC
		MED17	8-morula	ECHDC1	ESC
		MED26	8-morula	ECHDC2	ESC
		MED31	8-morula	ECHS1	ESC
		MED4	8-morula	ECSIT	ESC
		MED6	8-morula	EDC4	ESC
		MED7	8-morula	EDF1	ESC
		MED9	8-morula	EEF1B2	ESC
		MESDC1	8-morula	EEF1D	ESC
		METTL1	8-morula	EEFSEC	ESC
		METTL4	8-morula	EFCAB4A	ESC
		MEX3B	8-morula	EGFL7	ESC
		MFAP1	8-morula	EGR1	ESC
		MFAP3	8-morula	EGR2	ESC
		MFN1	8-morula	EGR3	ESC
		MFSD11	8-morula	EI24	ESC
		MFSD2A	8-morula	EID1	ESC
		MGAT2	8-morula	EIF1AX	ESC
		MGC12982	8-morula	EIF1AY	ESC
		MIR1282	8-morula	EIF2AK3	ESC
		MIR1974	8-morula	EIF2AK4	ESC
		MKRN1	8-morula	EIF2B2	ESC
		MLF1	8-morula	EIF2B4	ESC
		MOAP1	8-morula	EIF2B5	ESC
		MOB2	8-morula	EIF2C1	ESC
		MOBKL1A	8-morula	EIF2S3	ESC
		MOBKL2A	8-morula	EIF3E	ESC
		MORC3	8-morula	EIF3M	ESC
		MOSPD1	8-morula	EIF4A1	ESC
		MPP5	8-morula	EIF4EBP1	ESC
		MRAP	8-morula	EIF4EBP2	ESC
		MRGPRX3	8-morula	EIF5A	ESC
		MRPS23	8-morula	ELOVL1	ESC
		MRTO4	8-morula	ELOVL6	ESC
		MSL3L2	8-morula	ELP2	ESC
		MSMB	8-morula	EMB	ESC
		MSX1	8-morula	EMD	ESC
		MT1A	8-morula	EMID2	ESC
		MTMR12	8-morula	ENC1	ESC
		MTMR14	8-morula	ENO1	ESC
		MYC	8-morula	ENOPH1	ESC
		MYCL1	8-morula	ENPP1	ESC
		NAA40	8-morula	ENTPD6	ESC
		NANOGNB	8-morula	EPCAM	ESC
		NARF	8-morula	EPDR1	ESC
		NAT9	8-morula	EPHA1	ESC
		NBPF9	8-morula	EPHA2	ESC
		NCBP2	8-morula	EPHB4	ESC
		NCK1	8-morula	EPHB6	ESC
		NCRNA00087	8-morula	EPHX2	ESC
		NCRNA00115	8-morula	EPHX3	ESC
		NCRNA00120	8-morula	EPO	ESC
		NDST1	8-morula	EPRS	ESC
		NEDD9	8-morula	EPS8L2	ESC
		NEK2	8-morula	ERBB2	ESC
		NEK5	8-morula	ERBB3	ESC
		NEU1	8-morula	ERGIC1	ESC
		NF2	8-morula	ERGIC3	ESC
		NFATC2IP	8-morula	ERI3	ESC
		NFYA	8-morula	ERP29	ESC
		NGDN	8-morula	ERRFI1	ESC
		NGRN	8-morula	ESD	ESC
		NHP2L1	8-morula	ETFB	ESC
		NIP7	8-morula	ETNK2	ESC
		NKIRAS1	8-morula	ETS2	ESC
		NLK	8-morula	ETV4	ESC
		NME6	8-morula	EVL	ESC
		NMNAT1	8-morula	EXOSC5	ESC
		NMT2	8-morula	EXOSC8	ESC
		NOB1	8-morula	EXTL2	ESC
		NOL12	8-morula	F2R	ESC
		NOL6	8-morula	F3	ESC
		NOL9	8-morula	F8A1	ESC
		NOLC1	8-morula	FABP7	ESC
		NOM1	8-morula	FADS1	ESC
		NOP2	8-morula	FADS2	ESC
		NPTX2	8-morula	FAH	ESC
		NR1D2	8-morula	FAHD1	ESC
		NR4A2	8-morula	FAHD2A	ESC
		NR6A1	8-morula	FAHD2B	ESC
		NRBF2	8-morula	FAM108B1	ESC
		NRBP1	8-morula	FAM108C1	ESC
		NRF1	8-morula	FAM124A	ESC
		NSA2	8-morula	FAM125A	ESC
		NSDHL	8-morula	FAM126A	ESC
		NUDT4	8-morula	FAM127A	ESC
		NUDT4P1	8-morula	FAM127B	ESC
		NUFIP1	8-morula	FAM127C	ESC
		NUP155	8-morula	FAM129A	ESC
		NUSAP1	8-morula	FAM132A	ESC
		NXF1	8-morula	FAM136A	ESC
		OBFC2A	8-morula	FAM155A	ESC
		OPTN	8-morula	FAM156A	ESC
		OR2B6	8-morula	FAM156B	ESC
		OR52D1	8-morula	FAM162A	ESC
		OR6W1P	8-morula	FAM165B	ESC
		OTX1	8-morula	FAM171A1	ESC
		OVGP1	8-morula	FAM174A	ESC
		OVOL2	8-morula	FAM189B	ESC
		P2RY1	8-morula	FAM195B	ESC
		PAF1	8-morula	FAM20C	ESC
		PAIP2	8-morula	FAM36A	ESC
		PARP2	8-morula	FAM3C	ESC
		PCDH17	8-morula	FAM45A	ESC
		PCDH9	8-morula	FAM45B	ESC
		PDCL3	8-morula	FAM46B	ESC
		PDE12	8-morula	FAM57A	ESC
		PDE4DIP	8-morula	FAM64A	ESC
		PDRG1	8-morula	FAM69B	ESC
		PDS5B	8-morula	FAM84B	ESC
		PDXP	8-morula	FAM86A	ESC
		PER1	8-morula	FAM86DP	ESC
		PFDN1	8-morula	FAM92A1	ESC
		PFKFB3	8-morula	FAM96A	ESC
		PGM5P2	8-morula	FAN1	ESC
		PHF23	8-morula	FARSA	ESC
		PHF5A	8-morula	FARSB	ESC
		PHOSPHO1	8-morula	FASTK	ESC
		PIGA	8-morula	FBLIM1	ESC
		PIGH	8-morula	FBLL1	ESC
		PIK3AP1	8-morula	FBLN1	ESC
		PIK3C3	8-morula	FBXO17	ESC
		PIK3CB	8-morula	FBXO2	ESC
		PIK3IP1	8-morula	FBXO21	ESC
		PIK3R4	8-morula	FBXO22	ESC
		PILRB	8-morula	FBXO22OS	ESC
		PLA2G15	8-morula	FBXW4	ESC
		PLIN2	8-morula	FBXW5	ESC
		PLK1	8-morula	FDXR	ESC
		PLLP	8-morula	FEN1	ESC
		PLVAP	8-morula	FERMT1	ESC
		PMM1	8-morula	FEZ1	ESC
		PNMA1	8-morula	FGF18	ESC
		PNRC1	8-morula	FGF19	ESC
		PNRC2	8-morula	FGF2	ESC
		POLE3	8-morula	FGFR1	ESC
		POLH	8-morula	FHDC1	ESC
		POLR1C	8-morula	FHL1	ESC
		POLR2C	8-morula	FHL2	ESC
		POLR2F	8-morula	FHL3	ESC
		POLR3D	8-morula	FIBP	ESC
		POLR3H	8-morula	FIZ1	ESC
		POLRMT	8-morula	FJX1	ESC
		POMC	8-morula	FKBP10	ESC
		POTEG	8-morula	FKBP11	ESC
		POTEH	8-morula	FKBP14	ESC
		POTEM	8-morula	FKBP1A	ESC
		PPM1D	8-morula	FKBP1B	ESC
		PPM1N	8-morula	FKBP2	ESC
		PPP1R15A	8-morula	FKBP3	ESC
		PPP1R2	8-morula	FKBP4	ESC
		PPP1R2P3	8-morula	FKBP8	ESC
		PPP1R3B	8-morula	FLAD1	ESC
		PPP1R8	8-morula	FLII	ESC
		PPP2R3C	8-morula	FLJ22536	ESC
		PPP2R5D	8-morula	FLOT2	ESC
		PPTC7	8-morula	FLVCR1	ESC
		PQBP1	8-morula	FNBP1L	ESC
		PRAF2	8-morula	FOS	ESC
		PRAME	8-morula	FOSB	ESC
		PRAMEF1	8-morula	FOSL1	ESC
		PRAMEF10	8-morula	FOXA3	ESC
		PRAMEF11	8-morula	FOXD3	ESC
		PRAMEF12	8-morula	FOXH1	ESC
		PRAMEF13	8-morula	FOXN3	ESC
		PRAMEF14	8-morula	FOXP1	ESC
		PRAMEF15	8-morula	FOXRED1	ESC
		PRAMEF16	8-morula	FRZB	ESC
		PRAMEF17	8-morula	FSCN1	ESC
		PRAMEF18	8-morula	FSD1	ESC
		PRAMEF19	8-morula	FST	ESC
		PRAMEF2	8-morula	FSTL1	ESC
		PRAMEF20	8-morula	FTH1	ESC
		PRAMEF21	8-morula	FTSJ1	ESC
		PRAMEF22	8-morula	FUCA2	ESC
		PRAMEF3	8-morula	FUNDC2	ESC
		PRAMEF4	8-morula	FXYD5	ESC
		PRAMEF5	8-morula	FXYD6	ESC
		PRAMEF6	8-morula	FXYD7	ESC
		PRAMEF7	8-morula	FZD2	ESC
		PRAMEF8	8-morula	FZD7	ESC
		PRAMEF9	8-morula	G3BP1	ESC
		PRDXDD1P	8-morula	G6PC3	ESC
		PRKAG1	8-morula	GABARAP	ESC
		PRKD2	8-morula	GABRB3	ESC
		PRKRIP1	8-morula	GADD45GIP1	ESC
		PRKRIR	8-morula	GAL	ESC
		PRPF38A	8-morula	GAL3ST4	ESC
		PRPH	8-morula	GALK1	ESC
		PRPSAP1	8-morula	GALNT11	ESC
		PRR23A	8-morula	GALNT12	ESC
		PRR23B	8-morula	GALNT14	ESC
		PRR23C	8-morula	GALNT2	ESC
		PRRG1	8-morula	GALNT3	ESC
		PRSS41	8-morula	GALNT7	ESC
		PSMC4	8-morula	GAMT	ESC
		PSORS1C2	8-morula	GAP43	ESC
		PSPC1	8-morula	GAPDH	ESC
		PTCD1	8-morula	GART	ESC
		PTCHD3	8-morula	GAS1	ESC
		PTP4A1	8-morula	GATAD1	ESC
		PTPN21	8-morula	GATM	ESC
		PTPN9	8-morula	GBA2	ESC
		PTRH2	8-morula	GBAS	ESC
		PURB	8-morula	GCHFR	ESC
		PYGO1	8-morula	GCLM	ESC
		QRICH1	8-morula	GCNT2	ESC
		RAB1A	8-morula	GCSH	ESC
		RAB39	8-morula	GDAP1L1	ESC
		RAB41	8-morula	GDE1	ESC
		RAB5C	8-morula	GDF11	ESC
		RAB6A	8-morula	GEMIN7	ESC
		RABEP2	8-morula	GFOD2	ESC
		RABGEF1	8-morula	GFPT2	ESC
		RABIF	8-morula	GGA2	ESC
		RACGAP1	8-morula	GGCT	ESC
		RACGAP1P	8-morula	GINS1	ESC
		RAD51C	8-morula	GJA1	ESC
		RAD52	8-morula	GJB7	ESC
		RAP1B	8-morula	GLDC	ESC
		RAP1GDS1	8-morula	GLI2	ESC
		RAP2A	8-morula	GLI3	ESC
		RAP2B	8-morula	GLMN	ESC
		RAPH1	8-morula	GLRX3	ESC
		RASA2	8-morula	GLT8D2	ESC
		RASIP1	8-morula	GLTP	ESC
		RASSF1	8-morula	GMPPA	ESC
		RB1CC1	8-morula	GMPR2	ESC
		RBBP6	8-morula	GNAS	ESC
		RBM14	8-morula	GNASAS	ESC
		RBM15	8-morula	GNB1L	ESC
		RBM25	8-morula	GNG3	ESC
		RBM28	8-morula	GNPDA1	ESC
		RBM5	8-morula	GNPTG	ESC
		RBM7	8-morula	GOLIM4	ESC
		RBM8A	8-morula	GPAA1	ESC
		RBMX	8-morula	GPC3	ESC
		RBMY1A1	8-morula	GPC4	ESC
		RBMY1B	8-morula	GPI	ESC
		RBMY1D	8-morula	GPM6B	ESC
		RBMY1E	8-morula	GPR108	ESC
		RBMY2FP	8-morula	GPR125	ESC
		RBP7	8-morula	GPR172A	ESC
		RCL1	8-morula	GPR176	ESC
		RELB	8-morula	GPR19	ESC
		RETSAT	8-morula	GPRC5B	ESC
		REXO1L1	8-morula	GPS1	ESC
		REXO4	8-morula	GPX3	ESC
		RFK	8-morula	GPX7	ESC
		RFPL1	8-morula	GPX8	ESC
		RFPL1S	8-morula	GRAMD1A	ESC
		RFPL2	8-morula	GRB14	ESC
		RFPL3	8-morula	GREM1	ESC
		RFPL3S	8-morula	GRHPR	ESC
		RFPL4A	8-morula	GRPR	ESC
		RFPL4B	8-morula	GSDMD	ESC
		RG9MTD2	8-morula	GSPT2	ESC
		RGS10	8-morula	GSTA4	ESC
		RHOB	8-morula	GSTM2	ESC
		RHOXF2	8-morula	GSTM4	ESC
		RHOXF2B	8-morula	GSTO1	ESC
		RIC8A	8-morula	GSTO2	ESC
		RLIM	8-morula	GSTP1	ESC
		RNASE10	8-morula	GSTT1	ESC
		RNF11	8-morula	GSTZ1	ESC
		RNF113B	8-morula	GTF2H2	ESC
		RNF125	8-morula	GTF2H2B	ESC
		RNF138	8-morula	GTF2H2C	ESC
		RNF152	8-morula	GTF2H2D	ESC
		RNF168	8-morula	GTF2H3	ESC
		RNF19B	8-morula	GTF2I	ESC
		RNF25	8-morula	GTF2IP1	ESC
		RNF4	8-morula	GTF3C6	ESC
		RNMT	8-morula	GTPBP1	ESC
		RNU12	8-morula	GUCA1A	ESC
		RNU4ATAC	8-morula	GUK1	ESC
		RP2	8-morula	GULP1	ESC
		RPF1	8-morula	GUSBP3	ESC
		RPF2	8-morula	H2AFJ	ESC
		RPGRIP1	8-morula	H3F3A	ESC
		RPL10	8-morula	HACL1	ESC
		RPL10L	8-morula	HADH	ESC
		RPL23AP32	8-morula	HADHA	ESC
		RPL23AP82	8-morula	HADHB	ESC
		RPL26	8-morula	HAND1	ESC
		RPL28	8-morula	HARS	ESC
		RPL36	8-morula	HARS2	ESC
		RPL36A	8-morula	HAS2	ESC
		RPL38	8-morula	HAUS1	ESC
		RPLP0P2	8-morula	HAUS6	ESC
		RPP14	8-morula	HAUS7	ESC
		RPP25	8-morula	HCFC1R1	ESC
		RPRD1B	8-morula	HCG11	ESC
		RPS11	8-morula	HDAC5	ESC
		RPS15AP10	8-morula	HDAC7	ESC
		RPS21	8-morula	HDGF	ESC
		RPS28	8-morula	HDGFRP3	ESC
		RPS6KA3	8-morula	HEBP1	ESC
		RRM2	8-morula	HEBP2	ESC
		RRN3	8-morula	HELLS	ESC
		RRN3P2	8-morula	HES1	ESC
		RRP12	8-morula	HESRG	ESC
		RRP7B	8-morula	HESX1	ESC
		RRP8	8-morula	HEY1	ESC
		RRS1	8-morula	HHIP	ESC
		RSC1A1	8-morula	HIF1A	ESC
		RSPH10B	8-morula	HINT2	ESC
		RSPH10B2	8-morula	HINT3	ESC
		RSPO1	8-morula	HIST1H1C	ESC
		SAA1	8-morula	HIST1H2AE	ESC
		SAC3D1	8-morula	HIST1H2AK	ESC
		SAP18	8-morula	HIST1H4E	ESC
		SBDS	8-morula	HIST3H2A	ESC
		SBDSP1	8-morula	HK1	ESC
		SBNO1	8-morula	HLA-A	ESC
		SCNM1	8-morula	HLA-B	ESC
		SEC61A2	8-morula	HLA-C	ESC
		SEL1L	8-morula	HMBS	ESC
		SELM	8-morula	HMGA1	ESC
		SENP3	8-morula	HMGA2	ESC
		SENP5	8-morula	HMGN1	ESC
		SERINC1	8-morula	HMGN2	ESC
		SERTAD1	8-morula	HMGN3	ESC
		SERTAD3	8-morula	HMGN5	ESC
		SESN2	8-morula	HN1L	ESC
		SESN3	8-morula	HNRNPA0	ESC
		SF3B14	8-morula	HNRNPA3	ESC
		SFRS15	8-morula	HNRNPD	ESC
		SFTPD	8-morula	HNRNPK	ESC
		SGK1	8-morula	HNRNPR	ESC
		SGTB	8-morula	HNRPLL	ESC
		SH3BP5L	8-morula	HOMER1	ESC
		SHF	8-morula	HPS1	ESC
		SHOC2	8-morula	HPS3	ESC
		SHQ1	8-morula	HRASLS	ESC
		SIAH1	8-morula	HRH3	ESC
		SIRT1	8-morula	HRSP12	ESC
		SIX3	8-morula	HS6ST1	ESC
		SKA2	8-morula	HSCB	ESC
		SLC16A1	8-morula	HSD11B2	ESC
		SLC16A6	8-morula	HSD17B10	ESC
		SLC17A7	8-morula	HSD17B11	ESC
		SLC22A20	8-morula	HSD17B12	ESC
		SLC25A18	8-morula	HSD17B4	ESC
		SLC25A25	8-morula	HSD17B7	ESC
		SLC25A31	8-morula	HSF1	ESC
		SLC25A44	8-morula	HSP90AA1	ESC
		SLC2A14	8-morula	HSP90B1	ESC
		SLC2A3	8-morula	HSPA4	ESC
		SLC30A1	8-morula	HSPA9	ESC
		SLC34A2	8-morula	HSPB2	ESC
		SLC35E4	8-morula	HSPBP1	ESC
		SLC35F2	8-morula	HSPC159	ESC
		SLC36A2	8-morula	HSPD1	ESC
		SLC39A3	8-morula	HSPE1	ESC
		SLC47A1	8-morula	HTR1D	ESC
		SLC5A5	8-morula	HTRA1	ESC
		SLC6A8	8-morula	HUWE1	ESC
		SLC7A6	8-morula	HYAL2	ESC
		SLC7A6OS	8-morula	IARS	ESC
		SLC8A1	8-morula	IBTK	ESC
		SLC9A1	8-morula	ICAM3	ESC
		SMC4	8-morula	ICT1	ESC
		SMEK1	8-morula	ID1	ESC
		SMOX	8-morula	ID2	ESC
		SNAI1	8-morula	ID3	ESC
		SNAPC2	8-morula	ID4	ESC
		SNAR-C4	8-morula	IDH1	ESC
		SNHG1	8-morula	IDH3B	ESC
		SNHG3	8-morula	IDH3G	ESC
		SNHG9	8-morula	IDI1	ESC
		SNIP1	8-morula	IDI2	ESC
		SNORA4	8-morula	IDO1	ESC
		SNORA45	8-morula	IFI27L1	ESC
		SNORA53	8-morula	IFI27L2	ESC
		SNRNP35	8-morula	IFI35	ESC
		SNUPN	8-morula	IFITM1	ESC
		SNX16	8-morula	IFITM2	ESC
		SOAT2	8-morula	IFITM3	ESC
		SOCS7	8-morula	IFNAR1	ESC
		SOX15	8-morula	IFNGR1	ESC
		SPAG4	8-morula	IFRD2	ESC
		SPANXN3	8-morula	IFT57	ESC
		SPATA5L1	8-morula	IGF2BP1	ESC
		SPESP1	8-morula	IGF2BP2	ESC
		SPINK7	8-morula	IGFBP2	ESC
		SPRYD3	8-morula	IGFBP4	ESC
		SPRYD5	8-morula	IGFBP6	ESC
		SPSB3	8-morula	IGSF8	ESC
		SPTY2D1	8-morula	IKBKAP	ESC
		SRSF7	8-morula	IL18	ESC
		SRSF8	8-morula	IL27RA	ESC
		SSX1	8-morula	ILK	ESC
		SSX2	8-morula	ILVBL	ESC
		SSX2B	8-morula	IMPA2	ESC
		SSX3	8-morula	IMPACT	ESC
		SSX4	8-morula	IMPDH2	ESC
		SSX4B	8-morula	INA	ESC
		SSX6	8-morula	INF2	ESC
		ST3GAL2	8-morula	INHBA	ESC
		STAG3L1	8-morula	INTS1	ESC
		STAG3L2	8-morula	INTU	ESC
		STAG3L3	8-morula	IPO11	ESC
		STAM	8-morula	IPO4	ESC
		STAP2	8-morula	IPO5	ESC
		STIL	8-morula	IPW	ESC
		STIM1	8-morula	IREB2	ESC
		STK17A	8-morula	IRF2BP2	ESC
		STK17B	8-morula	IRF3	ESC
		STX11	8-morula	IRS2	ESC
		STYX	8-morula	IRX2	ESC
		SULT1A3	8-morula	ISCA1	ESC
		SULT1A4	8-morula	ISCA2	ESC
		SUPT7L	8-morula	ISG15	ESC
		SURF6	8-morula	ISOC2	ESC
		SUV39H1	8-morula	ISYNA1	ESC
		SYNGR4	8-morula	ITFG1	ESC
		SYS1	8-morula	ITFG2	ESC
		TAC1	8-morula	ITGA6	ESC
		TAF13	8-morula	ITGB1	ESC
		TAF5	8-morula	ITGB1BP1	ESC
		TAF7	8-morula	ITGB1BP2	ESC
		TAS1R1	8-morula	ITGB1BP3	ESC
		TAS2R39	8-morula	ITGB5	ESC
		TBC1D12	8-morula	ITLN2	ESC
		TBC1D13	8-morula	ITM2A	ESC
		TBCC	8-morula	ITM2B	ESC
		TBL3	8-morula	ITPA	ESC
		TCEB1	8-morula	IVD	ESC
		TCF24	8-morula	IVNS1ABP	ESC
		TCN2	8-morula	JAKMIP2	ESC
		TCTA	8-morula	JAM2	ESC
		TDRG1	8-morula	JMJD1C	ESC
		TERF2IP	8-morula	JTB	ESC
		TESK2	8-morula	JUN	ESC
		TFAM	8-morula	JUNB	ESC
		TFAP2C	8-morula	KCMF1	ESC
		TFB2M	8-morula	KCNK6	ESC
		TFIP11	8-morula	KCNQ2	ESC
		TFPT	8-morula	KCNS3	ESC
		THAP11	8-morula	KCTD14	ESC
		THOC4	8-morula	KCTD17	ESC
		TIAL1	8-morula	KCTD3	ESC
		TIGD1	8-morula	KDELR1	ESC
		TIGD7	8-morula	KDELR3	ESC
		TIMM50	8-morula	KDM1A	ESC
		TIMM8A	8-morula	KDM2B	ESC
		TKTL1	8-morula	KDR	ESC
		TMCO1	8-morula	KDSR	ESC
		TMEM11	8-morula	KEAP1	ESC
		TMEM111	8-morula	KHNYN	ESC
		TMEM167B	8-morula	KIAA0090	ESC
		TMEM185B	8-morula	KIAA0101	ESC
		TMEM186	8-morula	KIAA0114	ESC
		TMEM188	8-morula	KIAA0196	ESC
		TMEM19	8-morula	KIAA0319L	ESC
		TMEM199	8-morula	KIAA0368	ESC
		TMEM208	8-morula	KIAA0415	ESC
		TMEM209	8-morula	KIAA0649	ESC
		TMEM41B	8-morula	KIAA0664L3	ESC
		TMEM55B	8-morula	KIAA1244	ESC
		TMEM65	8-morula	KIAA1274	ESC
		TMEM68	8-morula	KIAA1586	ESC
		TMEM70	8-morula	KIAA1797	ESC
		TMEM92	8-morula	KIAA1826	ESC
		TMEM99	8-morula	KIAA2013	ESC
		TMUB2	8-morula	KIF1A	ESC
		TNFAIP1	8-morula	KIF22	ESC
		TNFSF9	8-morula	KIF2A	ESC
		TNNC2	8-morula	KIF5C	ESC
		TNNI3	8-morula	KIFC2	ESC
		TOE1	8-morula	KLF6	ESC
		TOP3A	8-morula	KLF7	ESC
		TOPORS	8-morula	KLHDC8B	ESC
		TOR1AIP2	8-morula	KLHL23	ESC
		TOR1B	8-morula	KLHL25	ESC
		TOX4	8-morula	KLHL9	ESC
		TP53BP2	8-morula	KLK1	ESC
		TPI1P2	8-morula	KLK13	ESC
		TPRX1	8-morula	KLKB1	ESC
		TPST1	8-morula	KPNA4	ESC
		TPTE	8-morula	KPNB1	ESC
		TPTE2P2	8-morula	KRCC1	ESC
		TRAPPC3	8-morula	KRTCAP2	ESC
		TRAPPC6B	8-morula	KRTCAP3	ESC
		TRIM38	8-morula	KTELC1	ESC
		TRIM43	8-morula	L1TD1	ESC
		TRIM43B	8-morula	L2HGDH	ESC
		TRIM48	8-morula	LACTB	ESC
		TRIM49	8-morula	LACTB2	ESC
		TRIM49L	8-morula	LAPTM4B	ESC
		TRIM53	8-morula	LARP1	ESC
		TRIM60	8-morula	LARP6	ESC
		TRIM61	8-morula	LARS	ESC
		TRIM64	8-morula	LAS1L	ESC
		TRIM64B	8-morula	LASS4	ESC
		TRNT1	8-morula	LAYN	ESC
		TRYX3	8-morula	LCK	ESC
		TSFM	8-morula	LCTL	ESC
		TSKS	8-morula	LDB2	ESC
		TSPY1	8-morula	LDHB	ESC
		TSPY2	8-morula	LDOC1	ESC
		TSPY3	8-morula	LDOC1L	ESC
		TSPY4	8-morula	LECT1	ESC
		TSPYL6	8-morula	LEFTY1	ESC
		TTC28AS	8-morula	LEPRE1	ESC
		TTC4	8-morula	LEPREL2	ESC
		TUBA3C	8-morula	LEPROTL1	ESC
		TUBA3D	8-morula	LGALS3	ESC
		TUBA3E	8-morula	LGALS3BP	ESC
		TUBB2C	8-morula	LGR4	ESC
		TWSG1	8-morula	LGTN	ESC
		UBAP1	8-morula	LIG1	ESC
		UBB	8-morula	LIMD2	ESC
		UBE2B	8-morula	LIMS1	ESC
		UBE2C	8-morula	LIN28B	ESC
		UBE2DNL	8-morula	LINGO1	ESC
		UBE2G1	8-morula	LIPA	ESC
		UBP1	8-morula	LITAF	ESC
		UBR7	8-morula	LMCD1	ESC
		UBTD1	8-morula	LMNB2	ESC
		UBTFL1	8-morula	LNP1	ESC
		UBXN1	8-morula	LOC100049076	ESC
		UBXN2A	8-morula	LOC100093631	ESC
		UBXN8	8-morula	LOC100127983	ESC
		UHMK1	8-morula	LOC100129034	ESC
		ULK2	8-morula	LOC100129138	ESC
		URB1	8-morula	LOC100129917	ESC
		USP17L2	8-morula	LOC100131138	ESC
		USP29	8-morula	LOC100132247	ESC
		USP38	8-morula	LOC100170939	ESC
		USP7	8-morula	LOC100190986	ESC
		UTP11L	8-morula	LOC100270710	ESC
		UTP14A	8-morula	LOC100272216	ESC
		UTP15	8-morula	LOC100287428	ESC
		UTP23	8-morula	LOC100288748	ESC
		UTP3	8-morula	LOC100289361	ESC
		UXT	8-morula	LOC100329108	ESC
		VAMP1	8-morula	LOC100499177	ESC
		VCY	8-morula	LOC147727	ESC
		VCY1B	8-morula	LOC157627	ESC
		VPS26A	8-morula	LOC202781	ESC
		VWC2	8-morula	LOC283070	ESC
		WBP5	8-morula	LOC283481	ESC
		WDR4	8-morula	LOC284454	ESC
		WDR43	8-morula	LOC285401	ESC
		WDR45	8-morula	LOC286467	ESC
		WDR47	8-morula	LOC388789	ESC
		WDR66	8-morula	LOC389834	ESC
		WDR83	8-morula	LOC391322	ESC
		WNT10B	8-morula	LOC400027	ESC
		YIPF4	8-morula	LOC400927	ESC
		YOD1	8-morula	LOC401397	ESC
		YPEL2	8-morula	LOC401588	ESC
		YRDC	8-morula	LOC440926	ESC
		YTHDF3	8-morula	LOC440944	ESC
		YY1	8-morula	LOC441454	ESC
		ZBBX	8-morula	LOC441666	ESC
		ZBTB10	8-morula	LOC541471	ESC
		ZBTB11	8-morula	LOC550112	ESC
		ZBTB24	8-morula	LOC550643	ESC
		ZCCHC10	8-morula	LOC613037	ESC
		ZFAND5	8-morula	LOC645212	ESC
		ZFP28	8-morula	LOC647859	ESC
		ZFP37	8-morula	LOC647979	ESC
		ZFYVE1	8-morula	LOC650368	ESC
		ZFYVE19	8-morula	LOC653391	ESC
		ZIK1	8-morula	LOC728377	ESC
		ZIM3	8-morula	LOC728392	ESC
		ZMAT5	8-morula	LOC729082	ESC
		ZMYM1	8-morula	LOC92249	ESC
		ZNF100	8-morula	LOC92659	ESC
		ZNF101	8-morula	LOC93622	ESC
		ZNF114	8-morula	LONP1	ESC
		ZNF124	8-morula	LPHN2	ESC
		ZNF134	8-morula	LQK1	ESC
		ZNF140	8-morula	LRFN5	ESC
		ZNF157	8-morula	LRPPRC	ESC
		ZNF169	8-morula	LRRC34	ESC
		ZNF174	8-morula	LRRC37A4	ESC
		ZNF189	8-morula	LRRC41	ESC
		ZNF212	8-morula	LRRC45	ESC
		ZNF226	8-morula	LRRC58	ESC
		ZNF23	8-morula	LRRN1	ESC
		ZNF254	8-morula	LSM12	ESC
		ZNF256	8-morula	LSM2	ESC
		ZNF266	8-morula	LSM3	ESC
		ZNF273	8-morula	LSM4	ESC
		ZNF280A	8-morula	LSM5	ESC
		ZNF296	8-morula	LSM6	ESC
		ZNF335	8-morula	LSM7	ESC
		ZNF34	8-morula	LXN	ESC
		ZNF350	8-morula	LYPLA1	ESC
		ZNF394	8-morula	LYPLA2	ESC
		ZNF408	8-morula	LYPLA2P1	ESC
		ZNF410	8-morula	LYRM4	ESC
		ZNF434	8-morula	LYRM7	ESC
		ZNF473	8-morula	LZTS2	ESC
		ZNF479	8-morula	M6PR	ESC
		ZNF486	8-morula	MAD2L2	ESC
		ZNF487P	8-morula	MAF1	ESC
		ZNF530	8-morula	MAFB	ESC
		ZNF534	8-morula	MAGED1	ESC
		ZNF568	8-morula	MAGED2	ESC
		ZNF576	8-morula	MAGED4B	ESC
		ZNF578	8-morula	MAGEF1	ESC
		ZNF581	8-morula	MAGEH1	ESC
		ZNF584	8-morula	MAGI1	ESC
		ZNF586	8-morula	MAGOHB	ESC
		ZNF595	8-morula	MAL2	ESC
		ZNF596	8-morula	MALAT1	ESC
		ZNF597	8-morula	MAMDC2	ESC
		ZNF606	8-morula	MAML1	ESC
		ZNF622	8-morula	MAN1B1	ESC
		ZNF639	8-morula	MAN2C1	ESC
		ZNF668	8-morula	MANBA	ESC
		ZNF669	8-morula	MAOB	ESC
		ZNF670	8-morula	MAP1B	ESC
		ZNF675	8-morula	MAP1D	ESC
		ZNF679	8-morula	MAP2K2	ESC
		ZNF681	8-morula	MAP2K3	ESC
		ZNF705A	8-morula	MAP2K4	ESC
		ZNF705D	8-morula	MAP2K6	ESC
		ZNF705G	8-morula	MAP3K2	ESC
		ZNF707	8-morula	MAP3K7	ESC
		ZNF716	8-morula	MAP3K9	ESC
		ZNF718	8-morula	MAPK13	ESC
		ZNF735	8-morula	MAPK1IP1L	ESC
		ZNF736	8-morula	MAPK8IP1	ESC
		ZNF778	8-morula	MAPKAPK3	ESC
		ZNF79	8-morula	MAPKAPK5	ESC
		ZNF80	8-morula	MAPRE2	ESC
		ZNF815	8-morula	MARCKSL1	ESC
		ZNF816	8-morula	MARVELD1	ESC
		ZNF823	8-morula	MARVELD2	ESC
		ZNF830	8-morula	MARVELD3	ESC
		ZNF844	8-morula	MATK	ESC
		ZNF878	8-morula	MBD3	ESC
		ZNF90	8-morula	MBOAT7	ESC
		ZNF92	8-morula	MBTD1	ESC
		ZNFX1	8-morula	MCCC2	ESC
		ZNHIT6	8-morula	Mcell	ESC
		ZRANB2	8-morula	MCM3APAS	ESC
		ZRSR2	8-morula	MCM5	ESC
		ZSCAN4	8-morula	MCM6	ESC
		ZSCAN5A	8-morula	MCM7	ESC
		ZSCAN5B	8-morula	MDH1	ESC
		ZZZ3	8-morula	MDH1B	ESC
				MDH2	ESC
				MDK	ESC
				MDN1	ESC
				MDP1	ESC
				ME2	ESC
				MECR	ESC
				MED22	ESC
				MEG3	ESC
				MEG8	ESC
				MEIS3P1	ESC
				MESDC2	ESC
				MEST	ESC
				METRNL	ESC
				METT10D	ESC
				METTL11A	ESC
				METTL13	ESC
				METTL2A	ESC
				METTL2B	ESC
				METTL3	ESC
				METTL5	ESC
				METTL7A	ESC
				METTL8	ESC
				MEX3A	ESC
				MFAP2	ESC
				MFGE8	ESC
				MFSD3	ESC
				MGC12916	ESC
				MGC21881	ESC
				MGEA5	ESC
				MGST1	ESC
				MGST3	ESC
				MICAL1	ESC
				MIDN	ESC
				MIF	ESC
				MINPP1	ESC
				MIOS	ESC
				MIR17HG	ESC
				MIS12	ESC
				MKKS	ESC
				MLEC	ESC
				MLH1	ESC
				MLLT11	ESC
				MLST8	ESC
				MMAB	ESC
				MMP24	ESC
				MMS19	ESC
				MN1	ESC
				MORF4L1	ESC
				MOSC1	ESC
				MPDU1	ESC
				MPDZ	ESC
				MPND	ESC
				MPPED2	ESC
				MPST	ESC
				MPV17	ESC
				MRAP2	ESC
				MREG	ESC
				MRGPRF	ESC
				MRM1	ESC
				MRP63	ESC
				MRPL1	ESC
				MRPL10	ESC
				MRPL11	ESC
				MRPL12	ESC
				MRPL13	ESC
				MRPL14	ESC
				MRPL15	ESC
				MRPL16	ESC
				MRPL21	ESC
				MRPL27	ESC
				MRPL28	ESC
				MRPL3	ESC
				MRPL34	ESC
				MRPL36	ESC
				MRPL37	ESC
				MRPL39	ESC
				MRPL40	ESC
				MRPL42	ESC
				MRPL45	ESC
				MRPL46	ESC
				MRPL47	ESC
				MRPL51	ESC
				MRPL54	ESC
				MRPL55	ESC
				MRPL9	ESC
				MRPS11	ESC
				MRPS12	ESC
				MRPS14	ESC
				MRPS15	ESC
				MRPS17	ESC
				MRPS18A	ESC
				MRPS2	ESC
				MRPS22	ESC
				MRPS24	ESC
				MRPS27	ESC
				MRPS28	ESC
				MRPS30	ESC
				MRPS34	ESC
				MRPS36	ESC
				MRPS6	ESC
				MRS2	ESC
				MSH6	ESC
				MSI1	ESC
				MSN	ESC
				MST4	ESC
				MSTO1	ESC
				MT1F	ESC
				MT1G	ESC
				MT1H	ESC
				MT1M	ESC
				MT1X	ESC
				MTA3	ESC
				MTAP	ESC
				MTCH2	ESC
				MTFMT	ESC
				MTG1	ESC
				MTHFD1	ESC
				MTHFD2	ESC
				MTHFS	ESC
				MTP18	ESC
				MTRNR2L9	ESC
				MTX1	ESC
				MTX2	ESC
				MUDENG	ESC
				MURC	ESC
				MUTED	ESC
				MUTYH	ESC
				MXD3	ESC
				MXRA8	ESC
				MYCN	ESC
				MYCNOS	ESC
				MYEF2	ESC
				MYEOV2	ESC
				MYH10	ESC
				MYH9	ESC
				MYL12A	ESC
				MYL6	ESC
				MYL6B	ESC
				MYL9	ESC
				MYO10	ESC
				MYO1C	ESC
				MYST2	ESC
				MZT2A	ESC
				MZT2B	ESC
				N4BP3	ESC
				NAA10	ESC
				NAA15	ESC
				NAB2	ESC
				NADK	ESC
				NAGK	ESC
				NAGLU	ESC
				NAMPT	ESC
				NANOG	ESC
				NAP1L3	ESC
				NAP1L6	ESC
				NAPRT1	ESC
				NARFL	ESC
				NAT14	ESC
				NBEA	ESC
				NCAPH2	ESC
				NCLN	ESC
				NCRNA00116	ESC
				NCRNA00173	ESC
				NCRNA00182	ESC
				NCRNA00201	ESC
				NCRNA00241	ESC
				NCRNA00263	ESC
				NDN	ESC
				NDUFA11	ESC
				NDUFA12	ESC
				NDUFA13	ESC
				NDUFA4	ESC
				NDUFA5	ESC
				NDUFA7	ESC
				NDUFA8	ESC
				NDUFA9	ESC
				NDUFAF2	ESC
				NDUFB1	ESC
				NDUFB10	ESC
				NDUFB11	ESC
				NDUFB2	ESC
				NDUFB3	ESC
				NDUFB4	ESC
				NDUFB7	ESC
				NDUFC2	ESC
				NDUFS3	ESC
				NDUFS4	ESC
				NDUFS5	ESC
				NDUFS6	ESC
				NDUFS7	ESC
				NDUFS8	ESC
				NDUFV1	ESC
				NDUFV2	ESC
				NDUFV3	ESC
				NECAB1	ESC
				NEK8	ESC
				NES	ESC
				NEURL2	ESC
				NEXN	ESC
				NFE2L1	ESC
				NFE2L3	ESC
				NFKBIL2	ESC
				NFKBIZ	ESC
				NFU1	ESC
				NFX1	ESC
				NFYB	ESC
				NGFRAP1	ESC
				NINJ1	ESC
				NIPSNAP1	ESC
				NIT2	ESC
				NKAIN1	ESC
				NKAIN4	ESC
				NKAPL	ESC
				NLGN2	ESC
				NLGN4X	ESC
				NLGN4Y	ESC
				NLN	ESC
				NMB	ESC
				NME1	ESC
				NME1-NME2	ESC
				NME2	ESC
				NME3	ESC
				NME4	ESC
				NMRAL1	ESC
				NMT1	ESC
				NMU	ESC
				NNAT	ESC
				NODAL	ESC
				NOL7	ESC
				NOMO1	ESC
				NOMO2	ESC
				NOMO3	ESC
				NONO	ESC
				NOTCH3	ESC
				NOV	ESC
				NOVA1	ESC
				NPDC1	ESC
				NPEPL1	ESC
				NPIPL3	ESC
				NPLOC4	ESC
				NPY	ESC
				NPY1R	ESC
				NQO1	ESC
				NQO2	ESC
				NR1H3	ESC
				NR2F6	ESC
				NR4A1	ESC
				NRARP	ESC
				NRD1	ESC
				NRM	ESC
				NRN1L	ESC
				NSMCE1	ESC
				NSUN5P1	ESC
				NSUN5P2	ESC
				NT5C	ESC
				NT5C3	ESC
				NT5C3L	ESC
				NT5DC1	ESC
				NT5DC2	ESC
				NTHL1	ESC
				NTS	ESC
				NUAK1	ESC
				NUAK2	ESC
				NUBP1	ESC
				NUBPL	ESC
				NUCB1	ESC
				NUCKS1	ESC
				NUDT1	ESC
				NUDT10	ESC
				NUDT11	ESC
				NUDT15	ESC
				NUDT22	ESC
				NUDT5	ESC
				NUMBL	ESC
				NUP188	ESC
				NUP210	ESC
				NUTF2	ESC
				NXN	ESC
				NXPH2	ESC
				OAZ1	ESC
				OAZ2	ESC
				OAZ3	ESC
				OCEL1	ESC
				OCIAD2	ESC
				OCLN	ESC
				OGFR	ESC
				OGFRL1	ESC
				OLA1	ESC
				OLFM1	ESC
				OLFML3	ESC
				OMA1	ESC
				OR2A20P	ESC
				OR2A9P	ESC
				ORC1L	ESC
				ORC3L	ESC
				OSGEP	ESC
				OST4	ESC
				OSTC	ESC
				OTUB1	ESC
				OTUD1	ESC
				OTUD6B	ESC
				OVCA2	ESC
				OXCT1	ESC
				P2RY11	ESC
				PABPC1	ESC
				PABPC3	ESC
				PACSIN3	ESC
				PAFAH1B3	ESC
				PAICS	ESC
				PAK1	ESC
				PANK1	ESC
				PANK2	ESC
				PAR5	ESC
				PARD6A	ESC
				PARK7	ESC
				PARM1	ESC
				PARP1	ESC
				PAR-SN	ESC
				PATZ1	ESC
				PAWR	ESC
				PBX1	ESC
				PCBD1	ESC
				PCBD2	ESC
				PCDH1	ESC
				PCDH18	ESC
				PCDHB2	ESC
				PCDHB5	ESC
				PCGF2	ESC
				PCK2	ESC
				PCOLCE	ESC
				PCYOX1	ESC
				PDCD2	ESC
				PDCD6	ESC
				PDE6D	ESC
				PDHB	ESC
				PDIA3	ESC
				PDIA4	ESC
				PDIA6	ESC
				PDLIM1	ESC
				PDLIM7	ESC
				PDPN	ESC
				PDSS1	ESC
				PDZD4	ESC
				PEA15	ESC
				PEBP1	ESC
				PECI	ESC
				PEG3AS	ESC
				PELP1	ESC
				PEMT	ESC
				PEPD	ESC
				PEX7	ESC
				PFAS	ESC
				PFDN4	ESC
				PFKM	ESC
				PFN1	ESC
				PFN2	ESC
				PGAM1	ESC
				PGAM4	ESC
				PGBD1	ESC
				PGBD5	ESC
				PGK1	ESC
				PGLS	ESC
				PGM1	ESC
				PGM2L1	ESC
				PGP	ESC
				PGRMC1	ESC
				PHB	ESC
				PHC1	ESC
				PHF10	ESC
				PHF15	ESC
				PHF17	ESC
				PHF19	ESC
				PHGDH	ESC
				PHIP	ESC
				PHLDA1	ESC
				PHLDA3	ESC
				PHLPP2	ESC
				PHPT1	ESC
				PHYH	ESC
				PI4KA	ESC
				PI4KAP1	ESC
				PI4KAP2	ESC
				PIAS3	ESC
				PIF1	ESC
				PIGK	ESC
				PIGM	ESC
				PIGW	ESC
				PIGY	ESC
				PIH1D1	ESC
				PIK3R2	ESC
				PIM2	ESC
				PIN1	ESC
				PIN4	ESC
				PINK1	ESC
				PIP4K2B	ESC
				PIPOX	ESC
				PIR	ESC
				PISD	ESC
				PJA1	ESC
				PKD2	ESC
				PKDCC	ESC
				PKIB	ESC
				PKIG	ESC
				PKM2	ESC
				PKN1	ESC
				PKP4	ESC
				PL-5283	ESC
				PLD3	ESC
				PLDN	ESC
				PLEKHA1	ESC
				PLEKHJ1	ESC
				PLK2	ESC
				PLOD1	ESC
				PLOD3	ESC
				PLP1	ESC
				PLP2	ESC
				PLS3	ESC
				PLSCR1	ESC
				PLSCR3	ESC
				PLTP	ESC
				PLXDC2	ESC
				PLXNB2	ESC
				PMAIP1	ESC
				PMF1	ESC
				PMPCB	ESC
				PMVK	ESC
				PNKP	ESC
				PNMAL1	ESC
				PNMT	ESC
				PNPLA3	ESC
				PODXL	ESC
				POGK	ESC
				POLD1	ESC
				POLD2	ESC
				POLD4	ESC
				POLE	ESC
				POLE2	ESC
				POLR2G	ESC
				POLR2H	ESC
				POLR2I	ESC
				POU5F1	ESC
				POU5F1B	ESC
				POU5F1P3	ESC
				POU5F1P4	ESC
				PPA2	ESC
				PPAP2A	ESC
				PPAP2B	ESC
				PPAPDC1B	ESC
				PPAT	ESC
				PPCS	ESC
				PPIA	ESC
				PPIB	ESC
				PPID	ESC
				PPIH	ESC
				PPIL1	ESC
				PPM1H	ESC
				PPM1J	ESC
				PPM1K	ESC
				PPOX	ESC
				PPP1CA	ESC
				PPP1R14B	ESC
				PPP1R1A	ESC
				PPP1R7	ESC
				PPP2CB	ESC
				PPP2R1A	ESC
				PPP2R2B	ESC
				PPP2R3B	ESC
				PPP4R1	ESC
				PPP5C	ESC
				PPT1	ESC
				PRCP	ESC
				PRDM14	ESC
				PRDX2	ESC
				PRDX4	ESC
				PRDX5	ESC
				PRDX6	ESC
				PRELID1	ESC
				PREX2	ESC
				PRH1	ESC
				PRIM1	ESC
				PRKAB2	ESC
				PRKAR1B	ESC
				PRKCB	ESC
				PRKCI	ESC
				PRKDC	ESC
				PRKX	ESC
				PRKY	ESC
				PRMT2	ESC
				PRMT3	ESC
				PRMT5	ESC
				PRMT6	ESC
				PRMT7	ESC
				PROCR	ESC
				ProSAPiP1	ESC
				PRR4	ESC
				PRRT2	ESC
				PRRX2	ESC
				PRTFDC1	ESC
				PSAT1	ESC
				PSENEN	ESC
				PSIMCT-1	ESC
				PSIP1	ESC
				PSKH1	ESC
				PSMA1	ESC
				PSMA4	ESC
				PSMB1	ESC
				PSMB10	ESC
				PSMB3	ESC
				PSMB4	ESC
				PSMB5	ESC
				PSMB7	ESC
				PSMC2	ESC
				PSMC3	ESC
				PSMC6	ESC
				PSMD13	ESC
				PSMD14	ESC
				PSMD5	ESC
				PSMD6	ESC
				PSME1	ESC
				PSME2	ESC
				PSME4	ESC
				PSMF1	ESC
				PSPH	ESC
				PSRC1	ESC
				PSTK	ESC
				PTBP2	ESC
				PTCD2	ESC
				PTCD3	ESC
				PTCHD1	ESC
				PTGES2	ESC
				PTMS	ESC
				PTOV1	ESC
				PTPLA	ESC
				PTPMT1	ESC
				PTPN12	ESC
				PTPN4	ESC
				PTPRF	ESC
				PTPRZ1	ESC
				PTRF	ESC
				PTS	ESC
				PUM1	ESC
				PUS1	ESC
				PVRL1	ESC
				PVRL2	ESC
				PWWP2A	ESC
				PXDN	ESC
				PYCARD	ESC
				PYCRL	ESC
				PYGL	ESC
				QPCT	ESC
				QPRT	ESC
				QRSL1	ESC
				QSER1	ESC
				R3HCC1	ESC
				RAB11B	ESC
				RAB11FIP1	ESC
				RAB13	ESC
				RAB14	ESC
				RAB1B	ESC
				RAB31	ESC
				RAB34	ESC
				RAB3B	ESC
				RAB3C	ESC
				RABAC1	ESC
				RABEPK	ESC
				RABGAP1L	ESC
				RAD23A	ESC
				RAD23B	ESC
				RAI14	ESC
				RAMP2	ESC
				RAMP3	ESC
				RANBP1	ESC
				RANGRF	ESC
				RARG	ESC
				RARRES2	ESC
				RARS	ESC
				RASL10B	ESC
				RASL11B	ESC
				RASL12	ESC
				RASSF4	ESC
				RASSF7	ESC
				RAVER2	ESC
				RBM10	ESC
				RBM15B	ESC
				RBM45	ESC
				RBP1	ESC
				RBPJ	ESC
				RBPMS	ESC
				RCC2	ESC
				RCN1	ESC
				RCN2	ESC
				RCN3	ESC
				RDH11	ESC
				REC8	ESC
				RECQL4	ESC
				REEP3	ESC
				REEP6	ESC
				REPIN1	ESC
				REPS1	ESC
				RFC5	ESC
				RFX5	ESC
				RFXANK	ESC
				RFXAP	ESC
				RGS17	ESC
				RGS19	ESC
				RGS5	ESC
				RHBDD3	ESC
				RHEB	ESC
				RHOF	ESC
				RHOQ	ESC
				RHOT2	ESC
				RIC8B	ESC
				RILPL2	ESC
				RIMS2	ESC
				RNASEH2A	ESC
				RNASEH2B	ESC
				RNASEH2C	ESC
				RNASEK	ESC
				RND2	ESC
				RND3	ESC
				RNF141	ESC
				RNF144B	ESC
				RNF175	ESC
				RNF26	ESC
				RNF5	ESC
				RNF5P1	ESC
				RNF7	ESC
				RNFT2	ESC
				RNH1	ESC
				RNPEP	ESC
				ROCK2	ESC
				ROD1	ESC
				ROGDI	ESC
				ROMO1	ESC
				ROR1	ESC
				RPA3	ESC
				RPL12	ESC
				RPL13	ESC
				RPL13AP20	ESC
				RPL13P5	ESC
				RPL14	ESC
				RPL17	ESC
				RPL18A	ESC
				RPL18AP3	ESC
				RPL19	ESC
				RPL21	ESC
				RPL21P28	ESC
				RPL22	ESC
				RPL23	ESC
				RPL27A	ESC
				RPL31	ESC
				RPL32	ESC
				RPL34	ESC
				RPL35	ESC
				RPL35A	ESC
				RPL37A	ESC
				RPL39L	ESC
				RPL41	ESC
				RPLP1	ESC
				RPP40	ESC
				RPRM	ESC
				RPS26	ESC
				RPS26P11	ESC
[truncated: 613 more rows]
