# Supplementary material for: ZFP560 facilitates KAP1-dependent chromatin repression to regulate exit from totipotency
Source: Research Square preprint supplement (doi:10.21203/rs.3.rs-7290036/v1), 2025-08-25
Supplement: Supplementary file 10 [file c5cb9858e6d0caf5c3c499c8.xlsx]

## Sheet: Mass Spectrometry
Protein	Description	Gene	OE_Ctr	OE
S4R1M9	Oxysterol-binding protein-related protein 10	Osbpl10	-	4013186
Q9Z321	DNA topoisomerase 3-beta-1	Top3b	-	39356058
Q9Z315	U4/U6.U5 tri-snRNP-associated protein 1	Sart1	-	6.27247e+06
Q9Z2Z9	Glutamine--fructose-6-phosphate aminotransferase [isomerizing] 2	Gfpt2	-	2.95908e+07
Q9Z2Z6	Mitochondrial carnitine/acylcarnitine carrier protein	Slc25a20	-	3717922
Q9Z2W0	Aspartyl aminopeptidase	Dnpep	-	9.30296e+06
Q9Z2U1	Proteasome subunit alpha type-5	Psma5	0	7.08328e+06
Q9Z2Q2	Lysine-rich nucleolar protein 1	Knop1	-	3.86323e+07
Q9Z2N8	Actin-like protein 6A	Actl6a	-	4.2967e+06
Q9Z2I0	Mitochondrial proton/calcium exchanger protein	Letm1	-	59896341
Q9Z2H5	Band 4.1-like protein 1	Epb41l1	-	5.92161e+06
Q9Z247	Peptidyl-prolyl cis-trans isomerase FKBP9	Fkbp9	-	2.85397e+06
Q9Z204	Heterogeneous nuclear ribonucleoproteins C1/C2	Hnrnpc	0	230620109
Q9Z1Z2	Serine-threonine kinase receptor-associated protein	Strap	-	1.16594e+07
Q9Z1Z0	General vesicular transport factor p115	Uso1	-	1.38602e+08
Q9Z1Q5	Chloride intracellular channel protein 1	Clic1	-	2.59797e+06
Q9Z1N5	Spliceosome RNA helicase Ddx39b	Ddx39b	-	3.32532e+07
Q9Z1N2	Origin recognition complex subunit 1	Orc1	-	4.96315e+07
Q9Z1M8	Protein Red	Ik	-	190692132
Q9Z1K5	E3 ubiquitin-protein ligase ARIH1	Arih1	-	1.02945e+06
Q9Z179	SHC SH2 domain-binding protein 1	Shcbp1	-	9.67515e+06
Q9Z172	Small ubiquitin-related modifier 3	Sumo3	0	24124296
Q9Z160	Conserved oligomeric Golgi complex subunit 1	Cog1	-	6398080
Q9Z127	Large neutral amino acids transporter small subunit 1	Slc7a5	0	5.19216e+06
Q9Z110	Delta-1-pyrroline-5-carboxylate synthase	Aldh18a1	-	1.3689e+08
Q9Z0X1	Apoptosis-inducing factor 1, mitochondrial	Aifm1	-	20997796
Q9Z0S1	3(2),5-bisphosphate nucleotidase 1	Bpnt1	-	3.80135e+06
Q9Z0H3	SWI/SNF-related matrix-associated actin-dependent regulator of chromatin subfamily B member 1	Smarcb1	-	4.20838e+06
Q9Z0H1	WD repeat-containing protein 46	Wdr46	-	1.18482e+08
Q9WVR4	RNA-binding protein FXR2	Fxr2	-	1.42545e+08
Q9WVM1	Rac GTPase-activating protein 1	Racgap1	-	19429381
Q9WVK4	EH domain-containing protein 1	Ehd1	-	2.78068e+07
Q9WVJ2	26S proteasome non-ATPase regulatory subunit 13	Psmd13	-	1.21025e+07
Q9WVA4	Transgelin-2	Tagln2	-	5.74949e+06
Q9WVA3	Mitotic checkpoint protein BUB3	Bub3	-	7294312
Q9WV80	Sorting nexin-1	Snx1	-	2.4584e+07
Q9WV70	Nucleolar complex protein 2 homolog	Noc2l	-	1.08914e+08
Q9WV55	Vesicle-associated membrane protein-associated protein A	Vapa	-	1.14722e+07
Q9WUU8	TNFAIP3-interacting protein 1	Tnip1	-	2.98671e+06
Q9WUP7	Ubiquitin carboxyl-terminal hydrolase isozyme L5	Uchl5	-	1.7401e+06
Q9WUM3	Coronin-1B	Coro1b	-	10243201
Q9WUA3	ATP-dependent 6-phosphofructokinase, platelet type	Pfkp	-	4.49227e+08
Q9WU84	Copper chaperone for superoxide dismutase	Ccs	-	6.64338e+06
Q9WU78	Programmed cell death 6-interacting protein	Pdcd6ip	-	1.28175e+08
Q9WTX8	Mitotic spindle assembly checkpoint protein MAD1	Mad1l1	-	6.35627e+07
Q9WTX6	Cullin-1	Cul1	-	2.11234e+08
Q9WTX5	S-phase kinase-associated protein 1	Skp1	-	1.60002e+06
Q9WTV7	E3 ubiquitin-protein ligase RLIM	Rlim	-	3012310
Q9WTP6	Adenylate kinase 2, mitochondrial	Ak2	-	6370405
Q9WTI7	Unconventional myosin-Ic	Myo1c	-	18652159
Q9R210	Transcription factor EB	Tfeb	-	26374944
Q9R207	Nibrin	Nbn	-	4330149
Q9R1T2	SUMO-activating enzyme subunit 1	Sae1	-	22894719
Q9R1P3	Proteasome subunit beta type-2	Psmb2	-	1.00744e+07
Q9R1P0	Proteasome subunit alpha type-4	Psma4	-	4.39602e+07
Q9R190	Metastasis-associated protein MTA2	Mta2	-	199172357
Q9R0X4	Acyl-coenzyme A thioesterase 9, mitochondrial	Acot9	-	3.69759e+07
Q9R0U0	Serine/arginine-rich splicing factor 10	Srsf10	-	2094145
Q9R0Q7	Prostaglandin E synthase 3	Ptges3	0	35745983
Q9R0Q4	Mortality factor 4-like protein 2	Morf4l2	-	1.8141e+06
Q9R0P5	Destrin	Dstn	-	4.10232e+06
Q9R0N0	Galactokinase	Galk1	-	1.16146e+07
Q9R0L7	A-kinase anchor protein 8-like	Akap8l	-	5.45658e+06
Q9R0E2	Procollagen-lysine,2-oxoglutarate 5-dioxygenase 1	Plod1	-	2.61136e+07
Q9R0E1	Multifunctional procollagen lysine hydroxylase and glycosyltransferase LH3	Plod3	-	7.82757e+07
Q9R0B9	Procollagen-lysine,2-oxoglutarate 5-dioxygenase 2	Plod2	-	3.34746e+07
Q9R069	Basal cell adhesion molecule	Bcam	-	1.4856e+08
Q9R020	Zinc finger Ran-binding domain-containing protein 2	Zranb2	-	4645423
Q9QZQ8	Core histone macro-H2A.1	Macroh2a1	-	31504144
Q9QZE5	Coatomer subunit gamma-1	Copg1	-	1.73764e+08
Q9QZ88	Vacuolar protein sorting-associated protein 29	Vps29	-	4.05655e+06
Q9QYY0	GRB2-associated-binding protein 1	Gab1	-	7.28789e+07
Q9QYJ0	DnaJ homolog subfamily A member 2	Dnaja2	-	31612027
Q9QYI3	DnaJ homolog subfamily C member 7	Dnajc7	-	1.80058e+07
Q9QYH6	Melanoma-associated antigen D1	Maged1	-	4.33861e+06
Q9QYE6	Golgin subfamily A member 5	Golga5	-	9462503
Q9QYB5	Gamma-adducin	Add3	-	1.58908e+06
Q9QYA2	Mitochondrial import receptor subunit TOM40 homolog	Tomm40	-	1.91385e+06
Q9QXX4	Electrogenic aspartate/glutamate antiporter SLC25A13, mitochondrial	Slc25a13	-	3.24092e+07
Q9QXK7	Cleavage and polyadenylation specificity factor subunit 3	Cpsf3	-	8.0027e+07
Q9QXK3	Coatomer subunit gamma-2	Copg2	-	39733901
Q9QXK2	E3 ubiquitin-protein ligase RAD18	Rad18	-	3.04207e+06
Q9QXG2	Rab proteins geranylgeranyltransferase component A 1	Chm	-	3160578
Q9QWV9	Cyclin-T1	Ccnt1	-	1.76193e+07
Q9QWT9	Kinesin-like protein KIFC1	Kifc1	-	8.40414e+07
Q9QUR6	Prolyl endopeptidase	Prep	-	2.08209e+07
Q9QUI0	Transforming protein RhoA	Rhoa	-	1.87536e+07
Q9JMH6	Thioredoxin reductase 1, cytoplasmic	Txnrd1	-	4.55336e+07
Q9JMD0	BUB3-interacting and GLEBS motif-containing protein ZNF207	Znf207	-	13070060
Q9JMA1	Ubiquitin carboxyl-terminal hydrolase 14	Usp14	-	2.48255e+08
Q9JLZ6	Hypermethylated in cancer 2 protein	Hic2	-	4.04709e+06
Q9JLV5	Cullin-3	Cul3	-	1.35091e+08
Q9JLQ2	ARF GTPase-activating protein GIT2	Git2	-	1.59645e+07
Q9JLQ0	CD2-associated protein	Cd2ap	-	129727547
Q9JLJ2	4-trimethylaminobutyraldehyde dehydrogenase	Aldh9a1	-	7.11119e+06
Q9JL60	Glucocorticoid modulatory element-binding protein 1	Gmeb1	-	42001500
Q9JKX6	ADP-sugar pyrophosphatase	Nudt5	-	1.19609e+06
Q9JKX4	Protein AATF	Aatf	-	1.18709e+08
Q9JKV1	Proteasomal ubiquitin receptor ADRM1	Adrm1	-	6.93319e+06
Q9JKC8	AP-3 complex subunit mu-1	Ap3m1	-	1.8978e+06
Q9JK91	DNA mismatch repair protein Mlh1	Mlh1	-	3.04605e+07
Q9JK81	MYG1 exonuclease	Myg1	-	4.92089e+06
Q9JK53	Prolargin	Prelp	-	14939038
Q9JK23	Proteasome assembly chaperone 1	Psmg1	-	2.056e+06
Q9JJY4	Probable ATP-dependent RNA helicase DDX20	Ddx20	-	33526249
Q9JJI8	Large ribosomal subunit protein eL38	Rpl38	-	3.45747e+07
Q9JJG9	Nitric oxide-associated protein 1	Noa1	-	2519823
Q9JJA4	Ribosome biogenesis protein WDR12	Wdr12	-	2.47182e+07
Q9JJ89	Coiled-coil domain-containing protein 86	Ccdc86	-	8.30036e+07
Q9JIM1	Equilibrative nucleoside transporter 1	Slc29a1	-	2.40061e+06
Q9JII6	Aldo-keto reductase family 1 member A1	Akr1a1	0	1.14588e+07
Q9JII5	DAZ-associated protein 1	Dazap1	-	5459609
Q9JIG7	Coiled-coil domain-containing protein 22	Ccdc22	-	4.47213e+06
Q9JIF7	Coatomer subunit beta	Copb1	-	1.40084e+08
Q9JIF0	Protein arginine N-methyltransferase 1	Prmt1	0	33882785
Q9JI13	Something about silencing protein 10	Utp3	-	86120768
Q9JHU9	Inositol-3-phosphate synthase 1	Isyna1	-	15735673
Q9JHR7	Insulin-degrading enzyme	Ide	-	6.15863e+07
Q9JHI7	Exosome complex component RRP45	Exosc9	-	2.50084e+07
Q9ET54	Palladin	Palld	-	8.10602e+06
Q9ESX5	H/ACA ribonucleoprotein complex subunit DKC1	Dkc1	-	1.76804e+07
Q9ESV0	ATP-dependent RNA helicase DDX24	Ddx24	-	4.79624e+06
Q9ES28	Rho guanine nucleotide exchange factor 7	Arhgef7	-	4.31828e+07
Q9ERG2	Striatin-3	Strn3	-	1.82131e+07
Q9ERG0	LIM domain and actin-binding protein 1	Lima1	-	4.47072e+06
Q9ERF3	Superkiller complex protein 8	Skic8	-	2.12652e+06
Q9ERD7	Tubulin beta-3 chain	Tubb3	-	8.48971e+06
Q9ERA6	Tuftelin-interacting protein 11	Tfip11	-	4.32054e+07
Q9ER72	Cysteine--tRNA ligase, cytoplasmic	Cars1	-	493564301
Q9EQK5	Major vault protein	Mvp	-	7.3777e+07
Q9EQH3	Vacuolar protein sorting-associated protein 35	Vps35	-	4.43066e+08
Q9EQG9	Ceramide transfer protein	Cert1	-	3.95975e+07
Q9EQ61	Pescadillo homolog	Pes1	0	2.30453e+08
Q9EQ28	DNA polymerase delta subunit 3	Pold3	-	1.12683e+07
Q9EPU0	Regulator of nonsense transcripts 1	Upf1	0	16353411
Q9EPL8	Importin-7	Ipo7	-	1.14298e+07
Q9EPK7	Exportin-7	Xpo7	-	7.73459e+07
Q9EP97	Sentrin-specific protease 3	Senp3	-	9.28435e+06
Q9EP69	Phosphatidylinositol-3-phosphatase SAC1	Sacm1l	-	1.73794e+06
Q9DCW4	Electron transfer flavoprotein subunit beta	Etfb	-	7684705
Q9DCN2	NADH-cytochrome b5 reductase 3	Cyb5r3	-	1.49568e+07
Q9DCE5	p21-activated protein kinase-interacting protein 1	Pak1ip1	-	1.48699e+07
Q9DCD5	Tight junction-associated protein 1	Tjap1	-	6.13996e+06
Q9DCD2	Pre-mRNA-splicing factor SYF1	Xab2	-	1.38663e+08
Q9DCD0	6-phosphogluconate dehydrogenase, decarboxylating	Pgd	0	5.6066e+07
Q9DCA5	Ribosome biogenesis protein BRX1 homolog	Brix1	-	1.32595e+07
Q9DC61	Mitochondrial-processing peptidase subunit alpha	Pmpca	-	2.58333e+06
Q9DC23	DnaJ homolog subfamily C member 10	Dnajc10	-	4.85524e+07
Q9DBZ5	Eukaryotic translation initiation factor 3 subunit K	Eif3k	-	1.92294e+06
Q9DBY8	Nuclear valosin-containing protein-like	Nvl	-	1.16994e+08
Q9DBY0	Forkhead box protein P4	Foxp4	-	3.25825e+06
Q9DBU3	Serine/threonine-protein kinase RIO3	Riok3	-	1.13403e+06
Q9DBT5	AMP deaminase 2	Ampd2	-	6.72062e+07
Q9DBR1	5-3 exoribonuclease 2	Xrn2	-	6.55353e+07
Q9DBR0	A-kinase anchor protein 8	Akap8	-	63726369
Q9DBN9	Probable ATP-dependent RNA helicase DDX59	Ddx59	-	1.9782e+06
Q9DBG7	Signal recognition particle receptor subunit alpha	Srpra	-	3.8831e+07
Q9DBG6	Dolichyl-diphosphooligosaccharide--protein glycosyltransferase subunit 2	Rpn2	-	5.25075e+06
Q9DBG3	AP-2 complex subunit beta	Ap2b1	-	73940518
Q9DBF7	Pre-mRNA-splicing factor CWC25 homolog	Cwc25	-	1.27672e+06
Q9DBF1	Alpha-aminoadipic semialdehyde dehydrogenase	Aldh7a1	-	5.34864e+06
Q9DBE9	pre-rRNA 2-O-ribose RNA methyltransferase FTSJ3	Ftsj3	-	1.75062e+07
Q9DBC3	Cap-specific mRNA (nucleoside-2-O-)-methyltransferase 1	Cmtr1	-	2.56187e+06
Q9DBB4	N-alpha-acetyltransferase 16, NatA auxiliary subunit	Naa16	-	9.35936e+06
Q9DB77	Cytochrome b-c1 complex subunit 2, mitochondrial	Uqcrc2	-	3.18677e+07
Q9DB20	ATP synthase subunit O, mitochondrial	Atp5po	-	4.88367e+06
Q9DAW9	Calponin-3	Cnn3	-	1.65091e+07
Q9DAW6	U4/U6 small nuclear ribonucleoprotein Prp4	Prpf4	-	3.63322e+06
Q9DAR7	m7GpppX diphosphatase	Dcps	-	634331
Q9D906	Ubiquitin-like modifier-activating enzyme ATG7	Atg7	-	1.7068e+06
Q9D903	Probable rRNA-processing protein EBP2	Ebna1bp2	-	9.42511e+06
Q9D8W5	26S proteasome non-ATPase regulatory subunit 12	Psmd12	-	48847981
Q9D8U8	Sorting nexin-5	Snx5	-	8.49602e+06
Q9D883	Splicing factor U2AF 35 kDa subunit	U2af1	-	1.35238e+07
Q9D880	Mitochondrial import inner membrane translocase subunit TIM50	Timm50	-	2.26225e+06
Q9D824	Pre-mRNA 3-end-processing factor FIP1	Fip1l1	-	1851539188
Q9D819	Inorganic pyrophosphatase	Ppa1	-	1.29367e+07
Q9D7S7	Ribosomal protein eL22-like 1	Rpl22l1	0	3204080
Q9D7I8	Protein FAM83D	Fam83d	-	3.26195e+06
Q9D7G0	Ribose-phosphate pyrophosphokinase 1	Prps1	-	4.64345e+07
Q9D786	HAUS augmin-like complex subunit 5	Haus5	-	4.99769e+06
Q9D710	Thioredoxin-related transmembrane protein 2	Tmx2	-	1.31114e+06
Q9D706	RNA polymerase II-associated protein 3	Rpap3	-	5.70207e+07
Q9D6U8	Protein FAM162A	Fam162a	-	2.35572e+06
Q9D6R2	Isocitrate dehydrogenase [NAD] subunit alpha, mitochondrial	Idh3a	-	3.48036e+07
Q9D666	SUN domain-containing protein 1	Sun1	-	2.96016e+06
Q9D662	Protein transport protein Sec23B	Sec23b	-	4.33777e+07
Q9D620	Rab11 family-interacting protein 1	Rab11fip1	-	1.99325e+06
Q9D5V5	Cullin-5	Cul5	-	2.7178e+08
Q9D554	Splicing factor 3A subunit 3	Sf3a3	-	9691619
Q9D4H8	Cullin-2	Cul2	-	319210031
Q9D4H1	Exocyst complex component 2	Exoc2	-	4.10364e+06
Q9D3D9	ATP synthase subunit delta, mitochondrial	Atp5f1d	-	1.99677e+06
Q9D394	Protein RUFY3	Rufy3	-	4475000
Q9D379	Epoxide hydrolase 1	Ephx1	-	2.60396e+06
Q9D358	Low molecular weight phosphotyrosine protein phosphatase	Acp1	-	6.85533e+06
Q9D2U9	H2B.U histone 2	H2bu2	-	303520992
Q9D2R0	Acetoacetyl-CoA synthetase	Aacs	-	1158730
Q9D2M8	Ubiquitin-conjugating enzyme E2 variant 2	Ube2v2	-	10842545
Q9D2G2	Dihydrolipoyllysine-residue succinyltransferase component of 2-oxoglutarate dehydrogenase complex, mitochondrial	Dlst	0	12040722
Q9D1M4	Eukaryotic translation elongation factor 1 epsilon-1	Eef1e1	-	1.08292e+07
Q9D1M0	Protein SEC13 homolog	Sec13	-	5.38895e+06
Q9D1J3	SAP domain-containing ribonucleoprotein	Sarnp	-	7.38503e+06
Q9D1H7	Golgi to ER traffic protein 4 homolog	Get4	-	4653318
Q9D1E6	Tubulin-folding cofactor B	Tbcb	-	2.47661e+06
Q9D1A2	Cytosolic non-specific dipeptidase	Cndp2	-	26675769
Q9D0T1	NHP2-like protein 1	Snu13	-	2.32909e+06
Q9D0R4	Probable ATP-dependent RNA helicase DDX56	Ddx56	-	1.17148e+06
Q9D0R2	Threonine--tRNA ligase 1, cytoplasmic	Tars1	0	5.16922e+08
Q9D0N7	Chromatin assembly factor 1 subunit B	Chaf1b	-	1.82608e+07
Q9D0M3	Cytochrome c1, heme protein, mitochondrial	Cyc1	-	2.3509e+07
Q9D0L8	mRNA cap guanine-N7 methyltransferase	Rnmt	-	4.69354e+06
Q9D0K2	Succinyl-CoA:3-ketoacid coenzyme A transferase 1, mitochondrial	Oxct1	-	1.12888e+07
Q9D0I8	mRNA turnover protein 4 homolog	Mrto4	-	4.07663e+06
Q9D0F6	Replication factor C subunit 5	Rfc5	-	1.38265e+06
Q9D0F1	Kinetochore protein NDC80 homolog	Ndc80	-	3.50466e+07
Q9D071	MMS19 nucleotide excision repair protein homolog	Mms19	-	6.92433e+07
Q9D051	Pyruvate dehydrogenase E1 component subunit beta, mitochondrial	Pdhb	-	4872283
Q9CZX0	Elongator complex protein 3	Elp3	-	2.49629e+07
Q9CZW5	Mitochondrial import receptor subunit TOM70	Tomm70	-	4.43626e+07
Q9CZW4	Fatty acid CoA ligase Acsl3	Acsl3	-	79813328
Q9CZU6	Citrate synthase, mitochondrial	Cs	0	6.97347e+07
Q9CZU3	Exosome RNA helicase MTR4	Mtrex	0	3.67316e+07
Q9CZT4	DNA-directed RNA polymerase III subunit RPC5	Polr3e	-	5037710
Q9CZN7	Serine hydroxymethyltransferase, mitochondrial	Shmt2	-	2.19444e+08
Q9CZJ1	Probable U3 small nucleolar RNA-associated protein 11	Utp11	-	1.66671e+06
Q9CZ44	NSFL1 cofactor p47	Nsfl1c	-	7.23274e+06
Q9CZ30	Obg-like ATPase 1	Ola1	-	1.96215e+07
Q9CZ13	Cytochrome b-c1 complex subunit 1, mitochondrial	Uqcrc1	-	1.66331e+07
Q9CYR6	Phosphoacetylglucosamine mutase	Pgm3	-	1.91687e+07
Q9CYR0	Single-stranded DNA-binding protein, mitochondrial	Ssbp1	-	8.52715e+06
Q9CYL5	Golgi-associated plant pathogenesis-related protein 1	Glipr2	-	1.525e+06
Q9CYH6	Ribosome biogenesis regulatory protein homolog	Rrs1	-	5.28653e+06
Q9CXY6	Interleukin enhancer-binding factor 2	Ilf2	-	4.17069e+07
Q9CXW3	Calcyclin-binding protein	Cacybp	0	1.01234e+08
Q9CXT8	Mitochondrial-processing peptidase subunit beta	Pmpcb	-	2.93413e+07
Q9CXF4	TBC1 domain family member 15	Tbc1d15	-	6.4212e+06
Q9CX86	Heterogeneous nuclear ribonucleoprotein A0	Hnrnpa0	-	2.22717e+07
Q9CX56	26S proteasome non-ATPase regulatory subunit 8	Psmd8	-	6026234
Q9CX34	Protein SGT1 homolog	Sugt1	-	23619292
Q9CWZ3	RNA-binding protein 8A	Rbm8a	-	2.17603e+07
Q9CWX9	Probable ATP-dependent RNA helicase DDX47	Ddx47	-	5.14222e+06
Q9CWW7	CXXC-type zinc finger protein 1	Cxxc1	-	1.67417e+07
Q9CWU9	Nucleoporin Nup37	Nup37	-	4.50775e+06
Q9CWL8	Beta-catenin-like protein 1	Ctnnbl1	-	2.84902e+07
Q9CWK8	Sorting nexin-2	Snx2	0	9.36053e+07
Q9CWJ9	Bifunctional purine biosynthesis protein ATIC	Atic	0	1.84787e+08
Q9CWF2	Tubulin beta-2B chain	Tubb2b	0	26171702
Q9CW46	Ribonucleoprotein PTB-binding 1	Raver1	-	153196224
Q9CW03	Structural maintenance of chromosomes protein 3	Smc3	0	2711358
Q9CVB6	Actin-related protein 2/3 complex subunit 2	Arpc2	-	1.88743e+07
Q9CV28	Ubiquitin carboxyl-terminal hydrolase MINDY-3	Mindy3	-	20127916
Q9CUN6	E3 ubiquitin-protein ligase SMURF1	Smurf1	-	5845313
Q9CT10	Ran-binding protein 3	Ranbp3	-	5.24364e+07
Q9CSH3	Exosome complex exonuclease RRP44	Dis3	0	5.66668e+07
Q9CS74	Protein ecdysoneless homolog	Ecd	-	1.37906e+07
Q9CRT8	Exportin-T	Xpot	-	5.94261e+07
Q9CRC8	Leucine-rich repeat-containing protein 40	Lrrc40	-	8.80776e+06
Q9CRB9	MICOS complex subunit Mic19	Chchd3	-	1.23196e+07
Q9CR68	Cytochrome b-c1 complex subunit Rieske, mitochondrial	Uqcrfs1	-	3.53563e+06
Q9CR67	Transmembrane protein 33	Tmem33	-	5.76516e+06
Q9CR16	Peptidyl-prolyl cis-trans isomerase D	Ppid	-	1.26427e+07
Q9CR02	Translation machinery-associated protein 16	Tma16	-	2324369
Q9CQX2	Cytochrome b5 type B	Cyb5b	-	1.91699e+06
Q9CQT1	Methylthioribose-1-phosphate isomerase	Mri1	-	1.296e+07
Q9CQS8	Protein transport protein Sec61 subunit beta	Sec61b	-	7.44991e+06
Q9CQS5	Serine/threonine-protein kinase RIO2	Riok2	-	3.42355e+08
Q9CQQ7	ATP synthase F(0) complex subunit B1, mitochondrial	Atp5pb	0	21884095
Q9CQN1	Heat shock protein 75 kDa, mitochondrial	Trap1	-	1.55922e+08
Q9CQM9	Glutaredoxin-3	Glrx3	-	1.56488e+07
Q9CQJ4	E3 ubiquitin-protein ligase RING2	Rnf2	-	5222024
Q9CQG2	RNA N6-adenosine-methyltransferase METTL16	Mettl16	-	5.74895e+06
Q9CQF3	Cleavage and polyadenylation specificity factor subunit 5	Nudt21	-	1.10208e+06
Q9CQE7	Endoplasmic reticulum-Golgi intermediate compartment protein 3	Ergic3	-	1.37028e+06
Q9CQC6	eIF5-mimic protein 2	Bzw1	-	43486991
Q9CQB5	CDGSH iron-sulfur domain-containing protein 2	Cisd2	-	1.08344e+06
Q9CQ73	Plakophilin-2	Pkp2	-	1.03862e+08
Q9CQ48	NudC domain-containing protein 2	Nudcd2	-	2.46023e+06
Q9CQ43	Deoxyuridine 5-triphosphate nucleotidohydrolase	Dut	-	2.08112e+06
Q9CQ21	Malignant T-cell-amplified sequence 2	Mcts2	-	2.10772e+06
Q9CPV4	Glyoxalase domain-containing protein 4	Glod4	-	12712185
Q9CPU0	Lactoylglutathione lyase	Glo1	-	3.3696e+06
Q9CPN8	Insulin-like growth factor 2 mRNA-binding protein 3	Igf2bp3	-	1.81818e+07
Q99PU7	Ubiquitin carboxyl-terminal hydrolase BAP1	Bap1	-	1.40085e+07
Q99PT1	Rho GDP-dissociation inhibitor 1	Arhgdia	-	59602286
Q99PL6	UBX domain-containing protein 6	Ubxn6	-	25102794
Q99NF8	Ran-binding protein 17	Ranbp17	-	5859689
Q99NB8	Ubiquilin-4	Ubqln4	-	2.70504e+06
Q99MR8	Methylcrotonoyl-CoA carboxylase subunit alpha, mitochondrial	Mccc1	-	9.91868e+06
Q99MK8	Beta-adrenergic receptor kinase 1	Grk2	-	4.25542e+06
Q99MJ9	ATP-dependent RNA helicase DDX50	Ddx50	-	31958481
Q99M31	Heat shock 70 kDa protein 14	Hspa14	-	1.2947e+07
Q99M28	RNA-binding protein with serine-rich domain 1	Rnps1	-	1.99195e+07
Q99LP6	GrpE protein homolog 1, mitochondrial	Grpel1	-	1.44906e+07
Q99LL5	Periodic tryptophan protein 1 homolog	Pwp1	-	3.36479e+07
Q99LI8	Hepatocyte growth factor-regulated tyrosine kinase substrate	Hgs	-	3503843
Q99LI7	Cleavage stimulation factor subunit 3	Cstf3	-	1.50186e+08
Q99LH1	Nucleolar GTP-binding protein 2	Gnl2	-	1.52298e+07
Q99LG4	Tetratricopeptide repeat protein 5	Ttc5	-	2.91676e+06
Q99LG2	Transportin-2	Tnpo2	-	62316725
Q99LF4	RNA-splicing ligase RtcB homolog	Rtcb	-	31853848
Q99LE6	ATP-binding cassette sub-family F member 2	Abcf2	0	5.04954e+08
Q99LD4	COP9 signalosome complex subunit 1	Gps1	-	1.04044e+07
Q99LC5	Electron transfer flavoprotein subunit alpha, mitochondrial	Etfa	-	4052003
Q99LC2	Cleavage stimulation factor subunit 1	Cstf1	-	1.64513e+06
Q99LB6	Methionine adenosyltransferase 2 subunit beta	Mat2b	-	19009994
Q99L48	60S ribosomal export protein NMD3	Nmd3	-	4595894
Q99KR3	Endoribonuclease LACTB2	Lactb2	-	2.39451e+06
Q99KQ4	Nicotinamide phosphoribosyltransferase	Nampt	-	1.16362e+07
Q99KN9	Clathrin interactor 1	Clint1	-	46777032
Q99KK2	N-acylneuraminate cytidylyltransferase	Cmas	-	18921012
Q99KG3	RNA-binding protein 10	Rbm10	-	1.75517e+06
Q99KD5	Protein unc-45 homolog A	Unc45a	-	6.90607e+07
Q99K85	Phosphoserine aminotransferase	Psat1	0	39872124
Q99K01	Pyridoxal-dependent decarboxylase domain-containing protein 1	Pdxdc1	-	4.379e+07
Q99JY9	Actin-related protein 3	Actr3	0	3.64181e+07
Q99JY0	Trifunctional enzyme subunit beta, mitochondrial	Hadhb	-	2.15463e+07
Q99JX7	Nuclear RNA export factor 1	Nxf1	-	1.27364e+07
Q99JX4	Eukaryotic translation initiation factor 3 subunit M	Eif3m	-	2.27282e+06
Q99JW2	Aminoacylase-1	Acy1	-	9.82149e+06
Q99JI4	26S proteasome non-ATPase regulatory subunit 6	Psmd6	0	2.09705e+07
Q99JF8	PC4 and SFRS1-interacting protein	Psip1	0	4.15035e+08
Q99J95	Cyclin-dependent kinase 9	Cdk9	-	3.07565e+06
Q99J62	Replication factor C subunit 4	Rfc4	-	19873180
Q99J36	THUMP domain-containing protein 1	Thumpd1	-	2.45134e+06
Q925I1	ATPase family AAA domain-containing protein 3	Atad3	-	2.21815e+06
Q924K8	Metastasis-associated protein MTA3	Mta3	-	16363308
Q924H7	WW domain-containing adapter protein with coiled-coil	Wac	-	3.86192e+06
Q924H2	Mediator of RNA polymerase II transcription subunit 15	Med15	-	2.8076e+06
Q923D5	WW domain-binding protein 11	Wbp11	0	17181707
Q923B1	Lariat debranching enzyme	Dbr1	-	2.29797e+07
Q922Y1	UBX domain-containing protein 1	Ubxn1	-	2.19666e+07
Q922X9	Protein arginine N-methyltransferase 7	Prmt7	-	1.12282e+07
Q922W5	Pyrroline-5-carboxylate reductase 1, mitochondrial	Pycr1	-	5.5719e+06
Q922V4	Pleiotropic regulator 1	Plrg1	-	6.7789e+06
Q922S8	Kinesin-like protein KIF2C	Kif2c	-	115651096
Q922R8	Protein disulfide-isomerase A6	Pdia6	0	30561649
Q922R5	Serine/threonine-protein phosphatase 4 regulatory subunit 3B	Ppp4r3b	-	3.06882e+06
Q922Q2	Serine/threonine-protein kinase RIO1	Riok1	-	1.33866e+07
Q922P9	Cytokine-like nuclear factor N-PAC	Glyr1	-	2.5336e+06
Q922H2	[Pyruvate dehydrogenase (acetyl-transferring)] kinase isozyme 3, mitochondrial	Pdk3	-	33481904
Q922D4	Serine/threonine-protein phosphatase 6 regulatory subunit 3	Ppp6r3	-	2.71594e+06
Q922B2	Aspartate--tRNA ligase, cytoplasmic	Dars1	0	6.04114e+07
Q921X9	Protein disulfide-isomerase A5	Pdia5	-	3836273
Q921N6	Probable ATP-dependent RNA helicase DDX27	Ddx27	-	3.26617e+08
Q921L5	Conserved oligomeric Golgi complex subunit 2	Cog2	-	4.08759e+06
Q921I2	Kelch domain-containing protein 4	Klhdc4	-	1.75393e+07
Q921I1	Serotransferrin	Tf	-	3.8875e+06
Q921G8	Gamma-tubulin complex component 2	Tubgcp2	-	1.76246e+07
Q921G6	Leucine-rich repeat and calponin homology domain-containing protein 4	Lrch4	-	1.37492e+07
Q921F4	Heterogeneous nuclear ribonucleoprotein L-like	Hnrnpll	-	9.02393e+07
Q921F2	TAR DNA-binding protein 43	Tardbp	0	5.79005e+07
Q921E6	Polycomb protein EED	Eed	-	14091907
Q921C5	Protein bicaudal D homolog 2	Bicd2	-	20768958
Q920Q8	Influenza virus NS1A-binding protein homolog	Ivns1abp	-	1.45332e+07
Q920A7	AFG3-like protein 1	Afg3l1	-	4.31107e+07
Q91ZR2	Sorting nexin-18	Snx18	-	2.04681e+06
Q91ZA3	Propionyl-CoA carboxylase alpha chain, mitochondrial	Pcca	-	5.23852e+06
Q91Z53	Glyoxylate reductase/hydroxypyruvate reductase	Grhpr	-	2.00199e+06
Q91YU8	Suppressor of SWI4 1 homolog	Ppan	-	2.02767e+06
Q91YU6	Leucine zipper putative tumor suppressor 2	Lzts2	-	1.51271e+06
Q91YT7	YTH domain-containing family protein 2	Ythdf2	-	4.39081e+06
Q91YT0	NADH dehydrogenase [ubiquinone] flavoprotein 1, mitochondrial	Ndufv1	-	3.60854e+07
Q91YR7	Pre-mRNA-processing factor 6	Prpf6	-	137939267
Q91YR5	eEF1A lysine and N-terminal methyltransferase	Mettl13	-	2.50849e+07
Q91YR1	Twinfilin-1	Twf1	-	2180885
Q91YP2	Neurolysin, mitochondrial	Nln	-	3.91386e+07
Q91YK2	Ribosomal RNA processing protein 1 homolog B	Rrp1b	0	2.5299e+08
Q91YJ5	Translation initiation factor IF-2, mitochondrial	Mtif2	-	2.61471e+07
Q91YH5	Atlastin-3	Atl3	-	836243
Q91YD3	mRNA-decapping enzyme 1A	Dcp1a	-	1.18604e+07
Q91XU0	ATPase WRNIP1	Wrnip1	-	2.40068e+07
Q91XI1	tRNA-dihydrouridine(47) synthase [NAD(P)(+)]-like	Dus3l	-	2.19635e+06
Q91X78	Erlin-1	Erlin1	-	3.27632e+06
Q91X20	Set1/Ash2 histone methyltransferase complex subunit ASH2	Ash2l	-	2.69322e+07
Q91WR3	Activating signal cointegrator 1 complex subunit 2	Ascc2	-	6.71915e+06
Q91WQ3	Tyrosine--tRNA ligase, cytoplasmic	Yars1	-	68341031
Q91WM3	U3 small nucleolar RNA-interacting protein 2	Rrp9	-	11055933
Q91WM1	Spermatid perinuclear RNA-binding protein	Strbp	-	78378011
Q91WG4	Elongator complex protein 2	Elp2	0	5.7267e+07
Q91WB4	Pleckstrin homology domain-containing family F member 2	Plekhf2	-	1.88664e+06
Q91W97	Hexokinase HKDC1	Hkdc1	-	1.94895e+06
Q91W96	Anaphase-promoting complex subunit 4	Anapc4	-	4.69756e+06
Q91W86	Vacuolar protein sorting-associated protein 11 homolog	Vps11	-	5.32033e+06
Q91W50	Cold shock domain-containing protein E1	Csde1	0	6.92349e+08
Q91W43	Glycine dehydrogenase (decarboxylating), mitochondrial	Gldc	0	7.61042e+07
Q91W18	Tudor domain-containing protein 3	Tdrd3	-	1.19601e+07
Q91VY9	Cytoplasmic 60S subunit biogenesis factor ZNF622	Znf622	-	2.67495e+06
Q91VU7	Pseudouridylate synthase 7 homolog	Pus7	-	1.29271e+08
Q91VN6	Probable ATP-dependent RNA helicase DDX41	Ddx41	-	4.97054e+06
Q91VK1	eIF5-mimic protein 1	Bzw2	-	3402267
Q91VH2	Sorting nexin-9	Snx9	-	5.05354e+06
Q91VD9	NADH-ubiquinone oxidoreductase 75 kDa subunit, mitochondrial	Ndufs1	-	1.86286e+08
Q8VI84	Nucleolar complex protein 3 homolog	Noc3l	-	6.55764e+07
Q8VI75	Importin-4	Ipo4	-	1869756
Q8VHR5	Transcriptional repressor p66-beta	Gatad2b	-	9.94574e+06
Q8VHK9	ATP-dependent DNA/RNA helicase DHX36	Dhx36	-	17997260
Q8VHE0	Translocation protein SEC63 homolog	Sec63	-	3.35797e+07
Q8VH51	RNA-binding protein 39	Rbm39	-	2.8806e+07
Q8VEE4	Replication protein A 70 kDa DNA-binding subunit	Rpa1	-	76431241
Q8VE97	Serine/arginine-rich splicing factor 4	Srsf4	-	27225613
Q8VE37	Regulator of chromosome condensation	Rcc1	-	7.59199e+07
Q8VDQ9	Protein KRI1 homolog	Kri1	-	1.7514e+06
Q8VDM6	Heterogeneous nuclear ribonucleoprotein U-like protein 1	Hnrnpul1	-	5.66915e+07
Q8VDM4	26S proteasome non-ATPase regulatory subunit 2	Psmd2	0	1146856122
Q8VDM1	Zinc finger CCCH-type with G patch domain-containing protein	Zgpat	-	1.65769e+06
Q8VDG3	Poly(A)-specific ribonuclease PARN	Parn	-	27931570
Q8VDF2	E3 ubiquitin-protein ligase UHRF1	Uhrf1	-	7.10613e+07
Q8VDD8	WASH complex subunit 1	Washc1	-	2105650
Q8VD04	GRIP1-associated protein 1	Gripap1	-	3.51092e+06
Q8VCY6	U3 small nucleolar RNA-associated protein 6 homolog	Utp6	-	8.39543e+06
Q8VCN5	Cystathionine gamma-lyase	Cth	-	1.62355e+07
Q8VCM8	BOS complex subunit NCLN	Ncln	-	1.71786e+06
Q8VCG3	WD repeat-containing protein 74	Wdr74	-	2.54007e+06
Q8VCD5	Mediator of RNA polymerase II transcription subunit 17	Med17	-	8.51052e+06
Q8VCB2	Mediator of RNA polymerase II transcription subunit 25	Med25	-	1.59298e+06
Q8VC31	Coiled-coil domain-containing protein 9	Ccdc9	-	20012046
Q8VBW6	NEDD8-activating enzyme E1 regulatory subunit	Nae1	-	18786836
Q8VBT9	Tether containing UBX domain for GLUT4	Aspscr1	-	105397736
Q8R5I6	Glutathione S-transferase Mu 4	Gstm4	-	2.16236e+06
Q8R5H6	Actin-binding protein WASF1	Wasf1	-	5.548e+06
Q8R480	Nuclear pore complex protein Nup85	Nup85	-	5.19459e+06
Q8R3Z5	Voltage-dependent L-type calcium channel subunit beta-1	Cacnb1	-	7006702
Q8R3S6	Exocyst complex component 1	Exoc1	-	3.94963e+07
Q8R3N6	THO complex subunit 1	Thoc1	-	7.51018e+07
Q8R3N1	Nucleolar protein 14	Nop14	-	1.82662e+07
Q8R3L2	Ribosome quality control complex subunit TCF25	Tcf25	-	4.01232e+06
Q8R3C0	Mini-chromosome maintenance complex-binding protein	Mcmbp	-	2.21505e+07
Q8R3B1	1-phosphatidylinositol 4,5-bisphosphate phosphodiesterase delta-1	Plcd1	-	3.95099e+07
Q8R349	Cell division cycle protein 16 homolog	Cdc16	-	7104932
Q8R326	Paraspeckle component 1	Pspc1	-	8.8901e+06
Q8R322	mRNA export factor GLE1	Gle1	-	4.82335e+06
Q8R2S9	Actin-related protein 8	Actr8	-	1281716
Q8R2Q8	Bone marrow stromal antigen 2	Bst2	-	2043083
Q8R2Q4	Ribosome-releasing factor 2, mitochondrial	Gfm2	-	7.87913e+07
Q8R2N2	U3 small nucleolar RNA-associated protein 4 homolog	Utp4	-	4.00158e+06
Q8R1X6	Spartin	Spart	-	3619216
Q8R1U1	Conserved oligomeric Golgi complex subunit 4	Cog4	-	3.78661e+07
Q8R1S4	Protein MTSS 1	Mtss1	-	682389
Q8R1Q8	Cytoplasmic dynein 1 light intermediate chain 1	Dync1li1	-	12422834
Q8R1F1	Protein Niban 2	Niban2	-	6972264
Q8R180	ERO1-like protein alpha	Ero1a	-	2.0193e+07
Q8R149	BUD13 homolog	Bud13	-	8483903
Q8R146	Acylamino-acid-releasing enzyme	Apeh	-	3.50167e+07
Q8R0X7	Sphingosine-1-phosphate lyase 1	Sgpl1	-	31763950
Q8R0W0	Epiplakin	Eppk1	-	15847019
Q8R0H9	ADP-ribosylation factor-binding protein GGA1	Gga1	-	9.00993e+06
Q8R0A0	General transcription factor IIF subunit 2	Gtf2f2	-	3.52998e+06
Q8R080	G2 and S phase-expressed protein 1	Gtse1	-	3.52405e+06
Q8R060	Protein zwilch homolog	Zwilch	-	6.56706e+06
Q8QZY9	Splicing factor 3B subunit 4	Sf3b4	-	3.56955e+06
Q8QZV7	Integrator complex subunit 13	IntS13	-	4.14277e+07
Q8N7N5	DDB1- and CUL4-associated factor 8	Dcaf8	-	1.24261e+07
Q8K4Z5	Splicing factor 3A subunit 1	Sf3a1	0	5.28975e+06
Q8K4R9	Disks large-associated protein 5	Dlgap5	-	5.16208e+06
Q8K4L0	ATP-dependent RNA helicase DDX54	Ddx54	0	66815265
Q8K4B0	Metastasis-associated protein MTA1	Mta1	-	4.9084e+07
Q8K411	Presequence protease, mitochondrial	Pitrm1	-	4.9437e+07
Q8K3Y3	Protein lin-28 homolog A	Lin28a	-	6789827
Q8K3X4	Probable E3 ubiquitin-protein ligase IRF2BPL	Irf2bpl	-	103368249
Q8K3H0	DCC-interacting protein 13-alpha	Appl1	-	8.60495e+07
Q8K3A9	7SK snRNA methylphosphate capping enzyme	Mepce	-	1.71197e+07
Q8K363	ATP-dependent RNA helicase DDX18	Ddx18	-	2.99819e+08
Q8K354	Carbonyl reductase [NADPH] 3	Cbr3	-	2.75662e+06
Q8K337	Type II inositol 1,4,5-trisphosphate 5-phosphatase	Inpp5b	-	3393713
Q8K2Z2	Pre-mRNA-processing factor 39	Prpf39	-	8.63708e+06
Q8K2W3	Thioredoxin domain-containing protein 11	Txndc11	-	2.02702e+06
Q8K2V6	Importin-11	Ipo11	-	1.89274e+07
Q8K2T8	RNA polymerase II-associated factor 1 homolog	Paf1	-	125802863
Q8K2Q7	BRO1 domain-containing protein BROX	Brox	-	1269835
Q8K2F0	Bromodomain-containing protein 3	Brd3	-	6.92249e+06
Q8K2C7	Protein OS-9	Os9	-	2.86846e+07
Q8K2B3	Succinate dehydrogenase [ubiquinone] flavoprotein subunit, mitochondrial	Sdha	-	80447081
Q8K2A7	Integrator complex subunit 10	Ints10	-	2.80185e+06
Q8K297	Procollagen galactosyltransferase 1	Colgalt1	-	77742192
Q8K268	ATP-binding cassette sub-family F member 3	Abcf3	-	28647822
Q8K224	RNA cytidine acetyltransferase	Nat10	-	6.70493e+06
Q8K1R3	Polyribonucleotide nucleotidyltransferase 1, mitochondrial	Pnpt1	-	1.07537e+08
Q8K1N4	Spermatogenesis-associated serine-rich protein 2	Spats2	-	1.36997e+07
Q8K1M6	Dynamin-1-like protein	Dnm1l	-	1.50332e+08
Q8K1J6	CCA tRNA nucleotidyltransferase 1, mitochondrial	Trnt1	-	2.72915e+06
Q8K1J5	Splicing regulator SDE2	Sde2	-	2.50432e+06
Q8K114	Integrator complex subunit 9	Ints9	-	2.5953e+06
Q8K0D5	Elongation factor G, mitochondrial	Gfm1	-	2.02013e+08
Q8K083	Zinc finger protein 536	Znf536	-	40053824
Q8K019	Bcl-2-associated transcription factor 1	Bclaf1	0	6.04431e+06
Q8K012	Formin-binding protein 1-like	Fnbp1l	-	1.71375e+06
Q8JZX4	Splicing factor 45	Rbm17	-	1.81829e+06
Q8JZS6	NEDD4-binding protein 2-like 2	N4bp2l2	-	8.25561e+06
Q8JZQ2	AFG3-like protein 2	Afg3l2	-	6.66277e+07
Q8JZN7	Mitochondrial Rho GTPase 2	Rhot2	-	1.49462e+06
Q8JZM7	Parafibromin	Cdc73	-	4.36022e+07
Q8CJG0	Protein argonaute-2	Ago2	-	4.62887e+07
Q8CJ53	Cdc42-interacting protein 4	Trip10	-	8.79105e+07
Q8CIN4	Serine/threonine-protein kinase PAK 2	Pak2	-	2644539
Q8CIM8	Integrator complex subunit 4	Ints4	-	1.53744e+07
Q8CIH9	Amidophosphoribosyltransferase	Ppat	-	4.63448e+07
Q8CIG8	Protein arginine N-methyltransferase 5	Prmt5	0	8.21568e+07
Q8CIG3	Lysine-specific histone demethylase 1B	Kdm1b	-	3.17316e+06
Q8CIB5	Fermitin family homolog 2	Fermt2	-	1.51538e+07
Q8CI95	Oxysterol-binding protein-related protein 11	Osbpl11	-	3.16856e+06
Q8CI94	Glycogen phosphorylase, brain form	Pygb	-	3633491
Q8CI51	PDZ and LIM domain protein 5	Pdlim5	-	3.90015e+06
Q8CI11	Guanine nucleotide-binding protein-like 3	Gnl3	-	4.28841e+07
Q8CI08	SLAIN motif-containing protein 2	Slain2	-	1.98587e+07
Q8CI04	Conserved oligomeric Golgi complex subunit 3	Cog3	-	3.95602e+06
Q8CHY6	Transcriptional repressor p66 alpha	Gatad2a	-	6.70717e+07
Q8CHW4	Translation initiation factor eIF-2B subunit epsilon	Eif2b5	-	8.57326e+07
Q8CHT3	Integrator complex subunit 5	Ints5	-	11753484
Q8CH02	SURP and G-patch domain-containing protein 1	Sugp1	-	36536707
Q8CGZ0	Calcium homeostasis endoplasmic reticulum protein	Cherp	0	1.31189e+06
Q8CGY8	UDP-N-acetylglucosamine--peptide N-acetylglucosaminyltransferase 110 kDa subunit	Ogt	-	90733330
Q8CGU1	Calcium-binding and coiled-coil domain-containing protein 1	Calcoco1	-	5284426
Q8CGK3	Lon protease homolog, mitochondrial	Lonp1	-	1.15519e+08
Q8CGC6	RNA-binding protein 28	Rbm28	-	1.85462e+08
Q8CG48	Structural maintenance of chromosomes protein 2	Smc2	0	5.80073e+07
Q8CFX1	GDH/6PGL endoplasmic bifunctional protein	H6pd	-	4.55625e+06
Q8CFA2	Aminomethyltransferase, mitochondrial	Amt	-	3.18995e+06
Q8CEC6	Peptidylprolyl isomerase domain and WD repeat-containing protein 1	Ppwd1	-	1.28832e+08
Q8CEC0	Nuclear pore complex protein Nup88	Nup88	-	2.92457e+07
Q8CE96	tRNA (adenine(58)-N(1))-methyltransferase non-catalytic subunit TRM6	Trmt6	-	5.35486e+06
Q8CE33	Kelch-like protein 11	Klhl11	-	2.33214e+06
Q8CD92	Tetratricopeptide repeat protein 27	Ttc27	-	7.43962e+07
Q8CCS6	Polyadenylate-binding protein 2	Pabpn1	-	26386270
Q8CCN5	BCAS3 microtubule associated cell migration factor	Bcas3	-	8484906
Q8CCK0	Core histone macro-H2A.2	Macroh2a2	-	3.01652e+06
Q8CCJ3	E3 UFM1-protein ligase 1	Ufl1	-	2.935e+07
Q8CCB4	Vacuolar protein sorting-associated protein 53 homolog	Vps53	-	3.67306e+07
Q8CAQ8	MICOS complex subunit Mic60	Immt	0	8.48915e+08
Q8C878	NEDD8-activating enzyme E1 catalytic subunit	Uba3	-	6.19824e+06
Q8C863	E3 ubiquitin-protein ligase Itchy	Itch	-	2.21539e+06
Q8C854	Myelin expression factor 2	Myef2	-	1.12729e+07
Q8C7V3	U3 small nucleolar RNA-associated protein 15 homolog	Utp15	-	2.32625e+06
Q8C7E9	Cleavage stimulation factor subunit 2 tau variant	Cstf2t	-	5.38621e+06
Q8C796	REST corepressor 2	Rcor2	-	6.08613e+06
Q8C754	Vacuolar protein sorting-associated protein 52 homolog	Vps52	-	2.05706e+06
Q8C6P8	Zinc finger protein 57	Zfp57	-	6042859
Q8C6G8	WD repeat-containing protein 26	Wdr26	-	1.49603e+07
Q8C5L7	RNA-binding protein 34	Rbm34	-	1957035
Q8C4J7	Transducin beta-like protein 3	Tbl3	-	1.10286e+08
Q8C3P7	N6-adenosine-methyltransferase subunit METTL3	Mettl3	-	2416680
Q8C2Q3	RNA-binding protein 14	Rbm14	0	6.82761e+08
Q8C2K1	Differentially expressed in FDCP 6	Def6	-	1.45635e+07
Q8C2E7	WASH complex subunit 5	Washc5	-	3.34227e+06
Q8C1B7	Septin-11	Septin11	-	1.98331e+07
Q8C1A5	Thimet oligopeptidase	Thop1	0	3.86351e+08
Q8C166	Copine-1	Cpne1	-	6.48847e+06
Q8C156	Condensin complex subunit 2	Ncaph	-	1.34228e+07
Q8C0L8	Conserved oligomeric Golgi complex subunit 5	Cog5	-	5.80894e+07
Q8C0D4	Rho GTPase-activating protein 12	Arhgap12	-	13755157
Q8C0C7	Phenylalanine--tRNA ligase alpha subunit	Farsa	-	31108725
Q8C092	Transcription initiation factor TFIID subunit 5	Taf5	-	1.94266e+07
Q8C052	Microtubule-associated protein 1S	Map1s	-	1.03511e+06
Q8BZX4	Splicing regulatory glutamine/lysine-rich protein 1	Srek1	-	3.78228e+06
Q8BZW8	NHL repeat-containing protein 2	Nhlrc2	-	1.53782e+07
Q8BZS9	Putative pre-mRNA-splicing factor ATP-dependent RNA helicase DHX32	Dhx32	-	3.63558e+07
Q8BZR9	Nuclear cap-binding protein subunit 3	Ncbp3	-	7.36911e+07
Q8BZQ7	Anaphase-promoting complex subunit 2	Anapc2	-	2.73252e+06
Q8BYU6	Torsin-1A-interacting protein 2	Tor1aip2	-	5.7241e+06
Q8BYK6	YTH domain-containing family protein 3	Ythdf3	-	2.44458e+06
Q8BYH7	TBC1 domain family member 17	Tbc1d17	-	1.77741e+07
Q8BY71	Histone acetyltransferase type B catalytic subunit	Hat1	-	3.254e+07
Q8BY02	NF-kappa-B-repressing factor	Nkrf	-	3.33223e+07
Q8BX10	Serine/threonine-protein phosphatase PGAM5, mitochondrial	Pgam5	-	1.91931e+07
Q8BX09	Retinoblastoma-binding protein 5	Rbbp5	-	54133400
Q8BWZ3	N-alpha-acetyltransferase 25, NatB auxiliary subunit	Naa25	-	4.60042e+07
Q8BWY9	Protein CIP2A	Cip2a	-	1.10948e+08
Q8BWW4	La-related protein 4	Larp4	-	1.04181e+07
Q8BWQ6	VPS35 endosomal protein-sorting factor-like	Vps35l	-	1.86059e+06
Q8BW10	RNA-binding protein NOB1	Nob1	-	9.93755e+06
Q8BVY0	Ribosomal L1 domain-containing protein 1	Rsl1d1	-	6.43249e+07
Q8BVI4	Dihydropteridine reductase	Qdpr	-	5597481
Q8BVG4	Dipeptidyl peptidase 9	Dpp9	-	6342734
Q8BUV3	Gephyrin	Gphn	-	11732812
Q8BUK6	Protein Hook homolog 3	Hook3	-	2.77925e+06
Q8BU14	Translocation protein SEC62	Sec62	-	5.27228e+06
Q8BU03	Periodic tryptophan protein 2 homolog	Pwp2	-	9.2194e+06
Q8BTZ4	Anaphase-promoting complex subunit 5	Anapc5	-	1.73564e+06
Q8BTY8	Sec1 family domain-containing protein 2	Scfd2	-	2.88407e+06
Q8BT60	Copine-3	Cpne3	-	6.78758e+06
Q8BT14	CCR4-NOT transcription complex subunit 4	Cnot4	-	1.03015e+07
Q8BSP2	Condensin-2 complex subunit H2	Ncaph2	-	3.78348e+06
Q8BSI6	R3H and coiled-coil domain-containing protein 1	R3hcc1	-	1.6149e+07
Q8BQM4	HEAT repeat-containing protein 3	Heatr3	-	1.26475e+08
Q8BQ30	Phostensin	Ppp1r18	-	8.82042e+06
Q8BPY9	Fidgetin-like protein 1	Fignl1	-	5.4235e+06
Q8BPU7	Engulfment and cell motility protein 1	Elmo1	-	3.58406e+07
Q8BPM2	Mitogen-activated protein kinase kinase kinase kinase 5	Map4k5	-	1.66629e+07
Q8BP40	Lysophosphatidic acid phosphatase type 6	Acp6	-	5773883
Q8BNW9	Kelch repeat and BTB domain-containing protein 11	Kbtbd11	-	2.30041e+06
Q8BNV1	tRNA (uracil-5-)-methyltransferase homolog A	Trmt2a	-	1.06601e+07
Q8BMS1	Trifunctional enzyme subunit alpha, mitochondrial	Hadha	-	1.86897e+08
Q8BMQ2	General transcription factor 3C polypeptide 4	Gtf3c4	-	1.86142e+07
Q8BMP6	Golgi resident protein GCP60	Acbd3	-	1.61409e+07
Q8BMK4	Cytoskeleton-associated protein 4	Ckap4	-	35515152
Q8BMJ3	Eukaryotic translation initiation factor 1A, X-chromosomal	Eif1ax	-	1.74309e+06
Q8BMJ2	Leucine--tRNA ligase, cytoplasmic	Lars1	-	1.48232e+06
Q8BMI3	ADP-ribosylation factor-binding protein GGA3	Gga3	-	7.13269e+06
Q8BMF4	Dihydrolipoyllysine-residue acetyltransferase component of pyruvate dehydrogenase complex, mitochondrial	Dlat	0	2.52107e+07
Q8BMC4	Nucleolar protein 9	Nop9	-	1.80172e+06
Q8BMA6	Signal recognition particle subunit SRP68	Srp68	-	1.70111e+07
Q8BM55	Transmembrane protein 214	Tmem214	-	3139324
Q8BLH7	HIRA-interacting protein 3	Hirip3	-	10006851
Q8BL97	Serine/arginine-rich splicing factor 7	Srsf7	-	6.33013e+07
Q8BKT7	THO complex subunit 5 homolog	Thoc5	-	3.8486e+07
Q8BKS9	Pumilio homolog 3	Pum3	-	1.34418e+08
Q8BKC5	Importin-5	Ipo5	0	8.42194e+07
Q8BK64	Activator of 90 kDa heat shock protein ATPase homolog 1	Ahsa1	-	2.87044e+06
Q8BK58	HSPB1-associated protein 1	Hspbap1	-	5.16151e+06
Q8BK35	Ribosome biogenesis protein NOP53	Nop53	-	2.44508e+06
Q8BJY1	26S proteasome non-ATPase regulatory subunit 5	Psmd5	-	2.56122e+07
Q8BJW5	Nucleolar protein 11	Nol11	-	72785921
Q8BJS4	SUN domain-containing protein 2	Sun2	-	1.14913e+07
Q8BJM7	S-adenosyl-L-methionine-dependent tRNA 4-demethylwyosine synthase TYW1	Tyw1	-	1.22666e+06
Q8BJL1	F-box only protein 30	Fbxo30	-	9788288
Q8BJ71	Nuclear pore complex protein Nup93	Nup93	-	4.50436e+08
Q8BJ05	Zinc finger CCCH domain-containing protein 14	Zc3h14	-	3.82396e+07
Q8BIW1	Exopolyphosphatase PRUNE1	Prune1	-	12171517
Q8BIP0	Aspartate--tRNA ligase, mitochondrial	Dars2	-	5.25345e+07
Q8BIL5	Protein Hook homolog 1	Hook1	-	9.68839e+07
Q8BIJ6	Isoleucine--tRNA ligase, mitochondrial	Iars2	-	3.8071e+07
Q8BHY2	Nucleolar complex protein 4 homolog	Noc4l	-	1.2959e+06
Q8BHS3	Pre-mRNA-splicing factor RBM22	Rbm22	-	2132807
Q8BHN3	Neutral alpha-glucosidase AB	Ganab	0	1.60785e+08
Q8BHJ9	Pre-mRNA-splicing factor SLU7	Slu7	-	13657308
Q8BHC4	Dephospho-CoA kinase domain-containing protein	Dcakd	-	1833580
Q8BHB4	WD repeat-containing protein 3	Wdr3	-	2.34248e+07
Q8BH74	Nuclear pore complex protein Nup107	Nup107	-	6.51654e+07
Q8BH57	WD repeat-containing protein 48	Wdr48	-	1.42807e+07
Q8BH43	Actin-binding protein WASF2	Wasf2	-	1.36348e+07
Q8BH15	CCR4-NOT transcription complex subunit 10	Cnot10	-	6.6904e+07
Q8BH04	Phosphoenolpyruvate carboxykinase [GTP], mitochondrial	Pck2	-	1.47985e+06
Q8BGH2	Sorting and assembly machinery component 50 homolog	Samm50	-	12466667
Q8BG67	Protein EFR3 homolog A	Efr3a	-	9.17426e+06
Q8BG51	Mitochondrial Rho GTPase 1	Rhot1	-	1.60523e+07
Q8BG40	Katanin p80 WD40 repeat-containing subunit B1	Katnb1	-	9.29551e+06
Q8BG32	26S proteasome non-ATPase regulatory subunit 11	Psmd11	-	1.15819e+08
Q8BG30	Negative elongation factor A	Nelfa	-	6.81106e+06
Q8BFZ9	Erlin-2	Erlin2	-	2.36536e+06
Q8BFY9	Transportin-1	Tnpo1	-	1.41491e+08
Q8BFU3	RING finger protein 214	Rnf214	-	5159013
Q8BFU2	Histone H2A type 3	H2ac25	-	7.10364e+06
Q8BFQ4	WD repeat-containing protein 82	Wdr82	-	2.01496e+06
Q811U4	Mitofusin-1	Mfn1	-	22112372
Q810V0	U3 small nucleolar ribonucleoprotein protein MPP10	Mphosph10	-	4402245
Q810J8	Zinc finger FYVE domain-containing protein 1	Zfyve1	-	6.05072e+06
Q810D6	Glutamate-rich WD repeat-containing protein 1	Grwd1	-	1.19014e+07
Q810A7	ATP-dependent RNA helicase DDX42	Ddx42	0	3.87558e+06
Q80ZK9	WD and tetratricopeptide repeats protein 1	Wdtc1	-	2.4063e+07
Q80YV4	4-phosphopantetheine phosphatase	Pank4	-	4.07607e+06
Q80YD1	ATP-dependent RNA helicase SUPV3L1, mitochondrial	Supv3l1	-	3.39566e+07
Q80Y98	Phospholipase DDHD2	Ddhd2	-	6.5676e+06
Q80Y81	Zinc phosphodiesterase ELAC protein 2	Elac2	-	1.99807e+08
Q80Y44	Probable ATP-dependent RNA helicase DDX10	Ddx10	-	2.63691e+06
Q80Y20	Alkylated DNA repair protein alkB homolog 8	Alkbh8	-	2.98246e+06
Q80XU3	Nuclear ubiquitous casein and cyclin-dependent kinase substrate 1	Nucks1	-	6946834
Q80XS6	Protein Smaug homolog 2	Samd4b	-	4.74598e+06
Q80XL6	Acyl-CoA dehydrogenase family member 11	Acad11	-	2.55569e+07
Q80WQ2	Protein VAC14 homolog	Vac14	-	5.21224e+07
Q80WJ7	Protein LYRIC	Mtdh	-	1.5924e+08
Q80VY9	ATP-dependent RNA helicase DHX33	Dhx33	-	19771796
Q80V86	Integrator complex subunit 8	Ints8	-	4.77507e+06
Q80UZ2	Protein SDA1 homolog	Sdad1	-	1.16806e+08
Q80UP5	Ankyrin repeat domain-containing protein 13A	Ankrd13a	-	1.28988e+07
Q80UM7	Mannosyl-oligosaccharide glucosidase	Mogs	-	2.61282e+06
Q80UK0	SEC14 domain and spectrin repeat-containing protein 1	Sestd1	-	17469542
Q80UG5	Septin-9	Septin9	-	3.97052e+06
Q80U70	Polycomb protein Suz12	Suz12	-	8.55972e+07
Q80TY0	Formin-binding protein 1	Fnbp1	-	1.1181e+07
Q80TA6	Myotubularin-related protein 12	Mtmr12	-	7.69264e+06
Q80SY5	Pre-mRNA-splicing factor 38B	Prpf38b	-	1.34142e+07
Q80SW1	S-adenosylhomocysteine hydrolase-like protein 1	Ahcyl1	-	4.03683e+06
Q7TSZ8	Nucleus accumbens-associated protein 1	Nacc1	-	3.90638e+06
Q7TSV4	Phosphopentomutase	Pgm2	-	1.79156e+07
Q7TSH9	Zinc finger protein 184	Zfp184	-	1.25246e+07
Q7TSH3	Zinc finger protein 516	Znf516	-	5.36672e+06
Q7TQK1	Integrator complex subunit 7	Ints7	-	13273336
Q7TQI3	Ubiquitin thioesterase OTUB1	Otub1	-	1.84242e+06
Q7TPS0	Ribosomal protein S6 kinase alpha-6	Rps6ka6	-	65411628
Q7TNV0	Protein DEK	Dek	-	2.73247e+07
Q7TNP2	Serine/threonine-protein phosphatase 2A 65 kDa regulatory subunit A beta isoform	Ppp2r1b	-	2.42599e+06
Q7TNG5	Echinoderm microtubule-associated protein-like 2	Eml2	-	4.30267e+06
Q7TNC4	Putative RNA-binding protein Luc7-like 2	Luc7l2	-	3.11865e+06
Q7TMX5	Protein SHQ1 homolog	Shq1	-	4.59133e+06
Q7TMK6	Protein Hook homolog 2	Hook2	-	1.27066e+08
Q7TMC8	L-fucose kinase	Fcsk	-	1.33481e+06
Q7M6Y3	Phosphatidylinositol-binding clathrin assembly protein	Picalm	-	21192253
Q7JJ13	Bromodomain-containing protein 2	Brd2	-	4.08571e+06
Q791V5	Mitochondrial carrier homolog 2	Mtch2	-	7.14105e+06
Q78ZA7	Nucleosome assembly protein 1-like 4	Nap1l4	-	3.1491e+06
Q78JE5	F-box only protein 22	Fbxo22	-	8066014
Q76LS9	Ubiquitin carboxyl-terminal hydrolase MINDY-1	Mindy1	-	7.11725e+06
Q6ZWV3	Large ribosomal subunit protein uL16	Rpl10	-	159881352
Q6ZWU9	Small ribosomal subunit protein eS27	Rps27	0	11424909
Q6ZWR6	Nesprin-1	Syne1	-	1.1978e+07
Q6ZWM4	U6 snRNA-associated Sm-like protein LSm8	Lsm8	-	1.60962e+06
Q6ZQL4	WD repeat-containing protein 43	Wdr43	-	2.32134e+08
Q6ZQK5	Arf-GAP with coiled-coil, ANK repeat and PH domain-containing protein 2	Acap2	-	5.67759e+07
Q6ZQ88	Lysine-specific histone demethylase 1A	Kdm1a	-	1.10763e+06
Q6ZQ08	CCR4-NOT transcription complex subunit 1	Cnot1	-	1.97498e+06
Q6ZPU9	KIF-binding protein	Kifbp	-	1.17513e+07
Q6ZPR5	Sphingomyelin phosphodiesterase 4	Smpd4	-	7.80926e+07
Q6ZPI0	Protein Jade-1	Jade1	-	8.53123e+06
Q6VN19	Ran-binding protein 10	Ranbp10	-	1.09803e+07
Q6PIP5	NudC domain-containing protein 1	Nudcd1	-	3.19121e+06
Q6PHQ8	N-alpha-acetyltransferase 35, NatC auxiliary subunit	Naa35	-	37243914
Q6PGG6	Guanine nucleotide-binding protein-like 3-like protein	Gnl3l	-	1.81777e+07
Q6PGF7	Exocyst complex component 8	Exoc8	-	9.92887e+06
Q6PGB6	N-alpha-acetyltransferase 50	Naa50	-	966854
Q6PG16	Holliday junction recognition protein	Hjurp	-	1.80962e+07
Q6PFR5	Transformer-2 protein homolog alpha	Tra2a	-	16235734
Q6PFQ7	Ras GTPase-activating protein 4	Rasa4	-	83703726
Q6PFD9	Nuclear pore complex protein Nup98-Nup96	Nup98	-	1.26829e+08
Q6PE54	Probable ATP-dependent RNA helicase DHX40	Dhx40	-	4.46322e+06
Q6PE01	U5 small nuclear ribonucleoprotein 40 kDa protein	Snrnp40	-	1.97703e+06
Q6PDZ2	TATA box-binding protein-associated factor RNA polymerase I subunit C	Taf1c	-	6089261
Q6PDM2	Serine/arginine-rich splicing factor 1	Srsf1	0	7.7043e+07
Q6PDJ6	F-box only protein 42	Fbxo42	-	1.84355e+06
Q6PDH0	Pleckstrin homology-like domain family B member 1	Phldb1	-	11363678
Q6PCM1	Lysine-specific demethylase 3A	Kdm3a	-	5.37893e+07
Q6PB97	F-box/LRR-repeat protein 19	Fbxl19	-	11292927
Q6PB66	Leucine-rich PPR motif-containing protein, mitochondrial	Lrpprc	-	1.82388e+07
Q6PAV2	Probable E3 ubiquitin-protein ligase HERC4	Herc4	-	4.49767e+07
Q6PAM1	Alpha-taxilin	Txlna	-	5.69276e+07
Q6PAC3	DDB1- and CUL4-associated factor 13	Dcaf13	-	7.40699e+06
Q6PA06	Atlastin-2	Atl2	-	2.66346e+07
Q6P9R1	ATP-dependent RNA helicase DDX51	Ddx51	-	3.26559e+07
Q6P5G6	UBX domain-containing protein 7	Ubxn7	-	20507614
Q6P5F9	Exportin-1	Xpo1	-	2.16965e+08
Q6P3Y5	Zinc finger protein 280C	Znf280c	-	4.74353e+06
Q6P2K6	Serine/threonine-protein phosphatase 4 regulatory subunit 3A	Ppp4r3a	-	1.12664e+08
Q6P2B1	Transportin-3	Tnpo3	-	163923204
Q6P1G2	Lysine-specific demethylase 2B	Kdm2b	-	2.44277e+07
Q6P1F6	Serine/threonine-protein phosphatase 2A 55 kDa regulatory subunit B alpha isoform	Ppp2r2a	-	1.62859e+07
Q6P1B1	Xaa-Pro aminopeptidase 1	Xpnpep1	-	1.19287e+08
Q6NZB0	DnaJ homolog subfamily C member 8	Dnajc8	-	4855168
Q6NXW6	Cell cycle checkpoint protein RAD17	Rad17	-	1402707
Q6NVF9	Cleavage and polyadenylation specificity factor subunit 6	Cpsf6	-	6.85055e+07
Q6NSQ7	Protein LTV1 homolog	Ltv1	-	8.85485e+07
Q6KAR6	Exocyst complex component 3	Exoc3	-	2.18335e+07
Q6J1H4	Undifferentiated embryonic cell transcription factor 1	Utf1	-	3.56054e+07
Q6IQX8	Zinc finger protein 219	Znf219	-	2.86641e+07
Q6DID5	PWWP domain-containing DNA repair factor 3A	Pwwp3a	-	8.03331e+06
Q6DFW4	Nucleolar protein 58	Nop58	0	1.82771e+08
Q6AXC6	ATP-dependent DNA helicase DDX11	Ddx11	-	2078053
Q6A0A2	La-related protein 4B	Larp4b	-	4064922
Q6A068	Cell division cycle 5-like protein	Cdc5l	-	1.72261e+08
Q69ZS7	HBS1-like protein	Hbs1l	-	2.18508e+06
Q69Z99	Zinc finger protein 512	Znf512	-	1.63235e+06
Q68FF6	ARF GTPase-activating protein GIT1	Git1	-	91419104
Q68ED3	Terminal nucleotidyltransferase 4B	Tent4b	-	2.04047e+06
Q64727	Vinculin	Vcl	0	1.19348e+07
Q64674	Spermidine synthase	Srm	-	2.05278e+06
Q64524	Histone H2B type 2-E	H2bc21	-	10500466
Q64523	Histone H2A type 2-C	H2ac20	-	3.39569e+06
Q64521	Glycerol-3-phosphate dehydrogenase, mitochondrial	Gpd2	-	2.05414e+08
Q64514	Tripeptidyl-peptidase 2	Tpp2	0	2.46933e+06
Q64478	Histone H2B type 1-H	H2bc9	-	3370889222
Q64378	Peptidyl-prolyl cis-trans isomerase FKBP5	Fkbp5	-	1.25634e+07
Q640Q5	PAN2-PAN3 deadenylation complex subunit Pan3	Pan3	-	1.1728e+06
Q640M1	U3 small nucleolar RNA-associated protein 14 homolog A	Utp14a	0	4.8212e+07
Q640L5	Coiled-coil domain-containing protein 18	Ccdc18	-	5183431
Q64092	Transcription factor E3	Tfe3	-	3.20258e+07
Q64012	RNA-binding protein Raly	Raly	-	2.92319e+07
Q63844	Mitogen-activated protein kinase 3	Mapk3	-	1.39831e+06
Q62511	E3 ubiquitin-protein ligase ZFP91	Zfp91	-	5.02591e+06
Q62446	Peptidyl-prolyl cis-trans isomerase FKBP3	Fkbp3	-	1.53445e+07
Q62441	Transducin-like enhancer protein 4	Tle4	-	3.8654e+06
Q62440	Transducin-like enhancer protein 1	Tle1	-	2380585
Q62418	Drebrin-like protein	Dbnl	-	3.40734e+06
Q62376	U1 small nuclear ribonucleoprotein 70 kDa	Snrnp70	-	6.87176e+07
Q62318	Transcription intermediary factor 1-beta	Trim28	-	1551026785
Q62311	Transcription initiation factor TFIID subunit 6	Taf6	-	3.03088e+07
Q62203	Splicing factor 3A subunit 2	Sf3a2	-	4.33992e+07
Q62193	Replication protein A 32 kDa subunit	Rpa2	-	3.90327e+06
Q62189	U1 small nuclear ribonucleoprotein A	Snrpa	-	8609621
Q62095	ATP-dependent RNA helicase DDX3Y	Ddx3y	-	1.0735e+07
Q62074	Protein kinase C iota type	Prkci	-	8.75289e+06
Q61990	Poly(rC)-binding protein 2	Pcbp2	0	32846324
Q61846	Maternal embryonic leucine zipper kinase	Melk	-	1.9272e+06
Q61753	D-3-phosphoglycerate dehydrogenase	Phgdh	0	3.97897e+07
Q61749	Translation initiation factor eIF-2B subunit delta	Eif2b4	-	1.54806e+07
Q61655	ATP-dependent RNA helicase DDX19A	Ddx19a	-	7.71607e+06
Q61598	Rab GDP dissociation inhibitor beta	Gdi2	0	1.0102e+08
Q61545	RNA-binding protein EWS	Ewsr1	-	6.17906e+07
Q61539	Steroid hormone receptor ERR2	Esrrb	-	2541806
Q61510	E3 ubiquitin/ISG15 ligase TRIM25	Trim25	-	1.11114e+07
Q61425	Hydroxyacyl-coenzyme A dehydrogenase, mitochondrial	Hadh	-	8135548
Q61391	Neprilysin	Mme	-	1.20241e+07
Q61216	Double-strand break repair protein MRE11	Mre11	-	4.13598e+07
Q61214	Dual specificity tyrosine-phosphorylation-regulated kinase 1A	Dyrk1a	-	4.85997e+06
Q61191	Host cell factor 1	Hcfc1	0	2.74248e+06
Q61188	Histone-lysine N-methyltransferase EZH2	Ezh2	-	2.54954e+07
Q61183	Poly(A) polymerase alpha	Papola	-	7592713
Q61166	Microtubule-associated protein RP/EB family member 1	Mapre1	-	4.46636e+06
Q61164	Transcriptional repressor CTCF	Ctcf	-	3.42221e+06
Q61081	Hsp90 co-chaperone Cdc37	Cdc37	-	1.6216e+06
Q61074	Protein phosphatase 1G	Ppm1g	0	1.06075e+08
Q60996	Serine/threonine-protein phosphatase 2A 56 kDa regulatory subunit gamma isoform	Ppp2r5c	-	4.56255e+06
Q60972	Histone-binding protein RBBP4	Rbbp4	0	43969531
Q60953	Protein PML	Pml	-	2.93375e+06
Q60931	Voltage-dependent anion-selective channel protein 3	Vdac3	-	3.6077e+06
Q60902	Epidermal growth factor receptor substrate 15-like 1	Eps15l1	-	4951819
Q60862	Origin recognition complex subunit 2	Orc2	-	1.1633e+06
Q60855	Receptor-interacting serine/threonine-protein kinase 1	Ripk1	-	2.91908e+06
Q60848	Lymphocyte-specific helicase	Hells	0	3.03094e+08
Q60838	Segment polarity protein dishevelled homolog DVL-2	Dvl2	-	8509927
Q60749	KH domain-containing, RNA-binding, signal transduction-associated protein 1	Khdrbs1	-	171214189
Q60737	Casein kinase II subunit alpha	Csnk2a1	-	5.53531e+07
Q60722	Transcription factor 4	Tcf4	-	1.09606e+06
Q60715	Prolyl 4-hydroxylase subunit alpha-1	P4ha1	-	1.13413e+06
Q60710	Deoxynucleoside triphosphate triphosphohydrolase SAMHD1	Samhd1	-	2.29421e+07
Q60692	Proteasome subunit beta type-6	Psmb6	-	8.52051e+06
Q60676	Serine/threonine-protein phosphatase 5	Ppp5c	-	4.07279e+06
Q60598	Src substrate cortactin	Cttn	-	1.40946e+08
Q60597	2-oxoglutarate dehydrogenase complex component E1	Ogdh	-	1.94012e+08
Q60596	DNA repair protein XRCC1	Xrcc1	-	7.32597e+07
Q5XJY5	Coatomer subunit delta	Arcn1	-	1882123
Q5UAK0	Mesoderm induction early response protein 1	Mier1	-	2.68913e+06
Q5U458	DnaJ homolog subfamily C member 11	Dnajc11	-	5.60589e+06
Q5SVQ0	Histone acetyltransferase KAT7	Kat7	-	9.21171e+07
Q5SUF2	Luc7-like protein 3	Luc7l3	-	1.70798e+07
Q5SU73	Coilin	Coil	-	2.06447e+06
Q5SSI6	U3 small nucleolar RNA-associated protein 18 homolog	Utp18	-	1.05068e+07
Q5SF07	Insulin-like growth factor 2 mRNA-binding protein 2	Igf2bp2	-	1.74229e+06
Q5RJG1	Nucleolar protein 10	Nol10	-	6.92158e+07
Q5KU39	Vacuolar protein sorting-associated protein 41 homolog	Vps41	-	21690602
Q5FWK3	Rho GTPase-activating protein 1	Arhgap1	-	4.38115e+06
Q5F2E7	FMR1-interacting protein NUFIP2	Nufip2	-	4.16983e+08
Q571I9	Aldehyde dehydrogenase family 16 member A1	Aldh16a1	-	1.16938e+08
Q571G4	Protein lin-54 homolog	Lin54	-	21739712
Q56A07	Sodium channel subunit beta-2	Scn2b	-	5.77618e+06
Q569Z5	Probable ATP-dependent RNA helicase DDX46	Ddx46	-	2.00601e+06
Q52KR3	Protein prune homolog 2	Prune2	-	92730916
Q505F5	Leucine-rich repeat-containing protein 47	Lrrc47	-	31923339
Q501J6	Probable ATP-dependent RNA helicase DDX17	Ddx17	0	3.01793e+08
Q4VBE8	WD repeat-containing protein 18	Wdr18	0	6094963
Q4FZF3	Probable ATP-dependent RNA helicase DDX49	Ddx49	-	2.06081e+06
Q4FK66	Pre-mRNA-splicing factor 38A	Prpf38a	-	1.164e+07
Q3V3R1	Monofunctional C1-tetrahydrofolate synthase, mitochondrial	Mthfd1l	0	1.22304e+08
Q3V300	Kinesin-like protein KIF22	Kif22	-	3.29169e+07
Q3V1T4	Prolyl 3-hydroxylase 1	P3h1	-	5.85037e+07
Q3V1H1	Cytoskeleton-associated protein 2	Ckap2	-	8.04927e+07
Q3UYV9	Nuclear cap-binding protein subunit 1	Ncbp1	-	1.13823e+08
Q3UVL4	Vacuolar protein sorting-associated protein 51 homolog	Vps51	-	5.94991e+06
Q3UVG3	Protein FAM91A1	Fam91a1	-	7.01241e+06
Q3US17	Zinc finger protein 48	Znf48	-	1.17491e+07
Q3URQ0	Testis-expressed protein 10	Tex10	-	2.02691e+08
Q3URI6	Zinc finger protein 560	Zfp560	0	2.59694e+07
Q3URD3	Sarcolemmal membrane-associated protein	Slmap	-	3.45769e+06
Q3UQU0	Bromodomain-containing protein 9	Brd9	-	3.48146e+07
Q3UQ84	Threonine--tRNA ligase, mitochondrial	Tars2	-	2.71021e+07
Q3UPL0	Protein transport protein Sec31A	Sec31a	-	3.3067e+06
Q3UMU9	Hepatoma-derived growth factor-related protein 2	Hdgfl2	0	7.29178e+06
Q3UMT1	Protein phosphatase 1 regulatory subunit 12C	Ppp1r12c	-	7.79029e+06
Q3UMQ8	H/ACA ribonucleoprotein complex non-core subunit NAF1	Naf1	-	2.18393e+07
Q3UMG5	Leucine-rich repeat and calponin homology domain-containing protein 2	Lrch2	-	3.04266e+06
Q3UMC0	ATPase family gene 2 protein homolog A	Afg2a	-	3.31465e+07
Q3UM45	Protein phosphatase 1 regulatory subunit 7	Ppp1r7	-	3.27552e+06
Q3UM29	Conserved oligomeric Golgi complex subunit 7	Cog7	-	3.21334e+07
Q3UM18	Large subunit GTPase 1 homolog	Lsg1	-	1.30569e+08
Q3UKJ7	WD40 repeat-containing protein SMU1	Smu1	-	2.67316e+07
Q3UKC1	Tax1-binding protein 1 homolog	Tax1bp1	-	861633
Q3UJB9	Enhancer of mRNA-decapping protein 4	Edc4	-	1.38063e+06
Q3UHX2	28 kDa heat- and acid-stable phosphoprotein	Pdap1	-	3.60451e+06
Q3UFY0	Ribosomal RNA processing protein 36 homolog	Rrp36	-	5691684
Q3UFM5	Nucleolar MIF4G domain-containing protein 1	Nom1	-	1.16679e+07
Q3UEB3	Poly(U)-binding-splicing factor PUF60	Puf60	-	10439802
Q3UDE2	Tubulin--tyrosine ligase-like protein 12	Ttll12	-	7.77317e+07
Q3UCQ1	Forkhead box protein K2	Foxk2	-	2.66135e+06
Q3UA37	Transcriptional regulator QRICH1	Qrich1	-	6.14199e+06
Q3U829	AP-5 complex subunit zeta-1	Ap5z1	-	1.38596e+06
Q3U821	WD repeat-containing protein 75	Wdr75	-	4.61236e+06
Q3U7R1	Extended synaptotagmin-1	Esyt1	-	4.17174e+06
Q3U3W5	Protein arginine N-methyltransferase 9	Prmt9	-	1.78039e+06
Q3U0K8	Prolyl 3-hydroxylase OGFOD1	Ogfod1	-	3.10061e+06
Q3TZZ7	Extended synaptotagmin-2	Esyt2	-	7.38402e+06
Q3TZX8	Polynucleotide 5-hydroxyl-kinase NOL9	Nol9	-	27834780
Q3TX08	tRNA (guanine(26)-N(2))-dimethyltransferase	Trmt1	-	1.32032e+08
Q3TWF6	WD repeat-containing protein 70	Wdr70	-	1.76581e+07
Q3TPX4	Exocyst complex component 5	Exoc5	-	1.33852e+06
Q3TPE9	Ankyrin repeat and MYND domain-containing protein 2	Ankmy2	-	963876
Q3TLD5	Unconventional prefoldin RPB5 interactor	Uri1	-	9740151
Q3TIX9	Ubiquitin carboxyl-terminal hydrolase 39	Usp39	-	3.12041e+06
Q3THW5	Histone H2A.V	H2az2	-	71534206
Q3THS6	S-adenosylmethionine synthase isoform type-2	Mat2a	0	1.24935e+08
Q3THK7	GMP synthase [glutamine-hydrolyzing]	Gmps	0	2.04818e+08
Q3THK3	General transcription factor IIF subunit 1	Gtf2f1	-	5.92369e+07
Q3TEA8	Heterochromatin protein 1-binding protein 3	Hp1bp3	-	6.06516e+06
Q3TDN2	FAS-associated factor 2	Faf2	-	1.57899e+06
Q3TDD9	Protein phosphatase 1 regulatory subunit 21	Ppp1r21	-	4.30269e+06
Q3TCH7	Cullin-4A	Cul4a	-	4443469
Q3TC46	Protein PAT1 homolog 1	Patl1	-	5.26962e+07
Q3B7Z2	Oxysterol-binding protein 1	Osbp	-	2.13312e+07
Q1PSW8	E3 ubiquitin-protein ligase TRIM71	Trim71	-	1.67375e+08
Q14CH7	Alanine--tRNA ligase, mitochondrial	Aars2	-	24805503
Q14C51	Small ribosomal subunit protein mS39	Ptcd3	-	9.12482e+07
Q149F1	Pseudouridylate synthase RPUSD2	Rpusd2	-	31916467
Q11136	Xaa-Pro dipeptidase	Pepd	-	11436245
Q11011	Puromycin-sensitive aminopeptidase	Npepps	-	3.5773e+08
Q0VGB7	Serine/threonine-protein phosphatase 4 regulatory subunit 2	Ppp4r2	-	3.71629e+06
Q0VBL3	RNA-binding protein 15	Rbm15	-	3.51234e+07
Q08879	Fibulin-1	Fbln1	-	4.03405e+06
Q08509	Epidermal growth factor receptor kinase substrate 8	Eps8	-	1.31584e+07
Q08288	Cell growth-regulating nucleolar protein	Lyar	-	38401909
Q08122	Transducin-like enhancer protein 3	Tle3	-	1.7797e+07
Q07076	Annexin A7	Anxa7	-	6850273
Q05CL8	La-related protein 7	Larp7	-	2.44718e+07
Q05512	Serine/threonine-protein kinase MARK2	Mark2	-	3.93957e+07
Q03173	Protein enabled homolog	Enah	-	5.20684e+08
Q03145	Ephrin type-A receptor 2	Epha2	-	7.189e+06
Q03141	MAP/microtubule affinity-regulating kinase 3	Mark3	-	9.68103e+06
Q02395	Metal-response element-binding transcription factor 2	Mtf2	-	10654132
Q02248	Catenin beta-1	Ctnnb1	0	1.24871e+08
Q01405	Protein transport protein Sec23A	Sec23a	-	6.19233e+07
Q00899	Transcriptional repressor protein YY1	Yy1	-	3.51421e+06
Q00612	Glucose-6-phosphate 1-dehydrogenase X	G6pdx	-	3.62435e+07
Q00547	Hyaluronan mediated motility receptor	Hmmr	-	60615827
P99026	Proteasome subunit beta type-4	Psmb4	-	3.90181e+07
P97823	Acyl-protein thioesterase 1	Lypla1	-	14483790
P97807	Fumarate hydratase, mitochondrial	Fh	-	49510602
P97494	Glutamate--cysteine ligase catalytic subunit	Gclc	-	1.62068e+06
P97480	Eyes absent homolog 3	Eya3	-	1.89822e+06
P97470	Serine/threonine-protein phosphatase 4 catalytic subunit	Ppp4c	-	5055565
P97452	Ribosome biogenesis protein BOP1	Bop1	-	4.69882e+07
P97429	Annexin A4	Anxa4	-	1.27476e+06
P97427	Dihydropyrimidinase-related protein 1	Crmp1	-	5.39939e+06
P97386	DNA ligase 3	Lig3	-	1.98242e+07
P97370	Sodium/potassium-transporting ATPase subunit beta-3	Atp1b3	-	7.56314e+06
P97329	Kinesin-like protein KIF20A	Kif20a	-	1.73224e+06
P84104	Serine/arginine-rich splicing factor 3	Srsf3	-	18079018
P84091	AP-2 complex subunit mu	Ap2m1	-	17775829
P84084	ADP-ribosylation factor 5	Arf5	-	4.61233e+06
P70699	Lysosomal alpha-glucosidase	Gaa	-	1918216
P70698	CTP synthase 1	Ctps1	-	8.63947e+07
P70697	Uroporphyrinogen decarboxylase	Urod	-	4.76736e+06
P70677	Caspase-3	Casp3	-	7019494
P70460	Vasodilator-stimulated phosphoprotein	Vasp	-	5.02754e+06
P70459	ETS domain-containing transcription factor ERF	Erf	-	3.23705e+08
P70404	Isocitrate dehydrogenase [NAD] subunit gamma 1, mitochondrial	Idh3g	-	1.22479e+06
P70372	ELAV-like protein 1	Elavl1	0	2.43432e+07
P70349	Adenosine 5-monophosphoramidase HINT1	Hint1	-	5.00702e+06
P70324	T-box transcription factor TBX3	Tbx3	-	3.7355e+06
P70302	Stromal interaction molecule 1	Stim1	-	3969843
P70298	Homeobox protein cut-like 2	Cux2	-	2445225
P70297	Signal transducing adapter molecule 1	Stam	-	4.55007e+06
P70288	Histone deacetylase 2	Hdac2	-	2932352
P70270	DNA repair and recombination protein RAD54-like	Rad54l	-	3.78351e+06
P70261	Paladin	Pald1	-	3.12214e+08
P70195	Proteasome subunit beta type-7	Psmb7	-	9.50884e+06
P69566	Ran-binding protein 9	Ranbp9	-	5.80224e+06
P68510	14-3-3 protein eta	Ywhah	0	3690918
P68433	Histone H3.1	H3c1	-	3.36883e+07
P68037	Ubiquitin-conjugating enzyme E2 L3	Ube2l3	-	1.62261e+06
P67871	Casein kinase II subunit beta	Csnk2b	-	4.33007e+06
P67778	Prohibitin 1	Phb1	0	7.82005e+07
P63280	SUMO-conjugating enzyme UBC9	Ube2i	-	5.7591e+06
P63276	Small ribosomal subunit protein eS17	Rps17	-	6.5482e+07
P63268	Actin, gamma-enteric smooth muscle	Actg2	-	1.9894e+08
P63168	Dynein light chain 1, cytoplasmic	Dynll1	-	11784739
P63166	Small ubiquitin-related modifier 1	Sumo1	-	3.72682e+07
P63154	Crooked neck-like protein 1	Crnkl1	-	8.12007e+07
P63087	Serine/threonine-protein phosphatase PP1-gamma catalytic subunit	Ppp1cc	-	4318985
P63085	Mitogen-activated protein kinase 1	Mapk1	-	4214508
P63037	DnaJ homolog subfamily A member 1	Dnaja1	-	1.50979e+07
P63005	Platelet-activating factor acetylhydrolase IB subunit beta	Pafah1b1	-	1.26195e+07
P63001	Ras-related C3 botulinum toxin substrate 1	Rac1	-	9091812
P62983	Ubiquitin-ribosomal protein eS31 fusion protein	Rps27a	-	1.66705e+07
P62960	Y-box-binding protein 1	Ybx1	-	4.14374e+07
P62889	Large ribosomal subunit protein eL30	Rpl30	-	3.8407e+07
P62880	Guanine nucleotide-binding protein G(I)/G(S)/G(T) subunit beta-2	Gnb2	-	13949336
P62869	Elongin-B	Elob	-	8.95704e+06
P62858	Small ribosomal subunit protein eS28	Rps28	-	2350472
P62843	Small ribosomal subunit protein uS19	Rps15	-	1.9827e+07
P62830	Large ribosomal subunit protein uL14	Rpl23	0	9.47583e+07
P62821	Ras-related protein Rab-1A	Rab1A	0	2.88981e+07
P62814	V-type proton ATPase subunit B, brain isoform	Atp6v1b2	0	1.82069e+07
P62715	Serine/threonine-protein phosphatase 2A catalytic subunit beta isoform	Ppp2cb	-	2514961
P62631	Elongation factor 1-alpha 2	Eef1a2	-	3.78207e+06
P62320	Small nuclear ribonucleoprotein Sm D3	Snrpd3	-	7.22611e+06
P62317	Small nuclear ribonucleoprotein Sm D2	Snrpd2	-	62823859
P62315	Small nuclear ribonucleoprotein Sm D1	Snrpd1	0	5.09662e+06
P62270	Small ribosomal subunit protein uS13	Rps18	-	1.44856e+08
P62196	26S proteasome regulatory subunit 8	Psmc5	-	2.58528e+07
P62192	26S proteasome regulatory subunit 4	Psmc1	0	4.5213e+07
P62141	Serine/threonine-protein phosphatase PP1-beta catalytic subunit	Ppp1cb	-	2.43179e+06
P62137	Serine/threonine-protein phosphatase PP1-alpha catalytic subunit	Ppp1ca	-	23010026
P62082	Small ribosomal subunit protein eS7	Rps7	-	8202520
P62046	Leucine-rich repeat and calponin homology domain-containing protein 1	Lrch1	-	2.19266e+06
P61965	WD repeat-containing protein 5	Wdr5	-	7.63116e+06
P61620	Protein transport protein Sec61 subunit alpha isoform 1	Sec61a1	-	1.15255e+06
P61514	Large ribosomal subunit protein eL43	Rpl37a	-	7.21289e+06
P61290	Proteasome activator complex subunit 3	Psme3	-	5.80152e+06
P61205	ADP-ribosylation factor 3	Arf3	-	8723853
P61202	COP9 signalosome complex subunit 2	Cops2	-	3.71184e+06
P61164	Alpha-centractin	Actr1a	-	5109551
P61161	Actin-related protein 2	Actr2	-	22782552
P61089	Ubiquitin-conjugating enzyme E2 N	Ube2n	-	2.38375e+07
P61087	Ubiquitin-conjugating enzyme E2 K	Ube2k	-	2.39982e+07
P61079	Ubiquitin-conjugating enzyme E2 D3	Ube2d3	-	41034357
P60766	Cell division control protein 42 homolog	Cdc42	-	1.5829e+06
P60670	Nuclear protein localization protein 4 homolog	Nploc4	-	2.18295e+07
P60521	Gamma-aminobutyric acid receptor-associated protein-like 2	Gabarapl2	-	2360587
P59999	Actin-related protein 2/3 complex subunit 4	Arpc4	0	1.71996e+07
P59328	WD repeat and HMG-box DNA-binding protein 1	Wdhd1	-	1.6055e+06
P59326	YTH domain-containing family protein 1	Ythdf1	-	18382182
P59325	Eukaryotic translation initiation factor 5	Eif5	-	19230669
P59235	Nucleoporin Nup43	Nup43	-	3.6965e+06
P59178	Lethal(3)malignant brain tumor-like protein 2	L3mbtl2	-	3.42418e+07
P59110	Sentrin-specific protease 1	Senp1	-	2.71616e+06
P59017	Bcl-2-like protein 13	Bcl2l13	-	2.35668e+07
P58771	Tropomyosin alpha-1 chain	Tpm1	-	856514
P58404	Striatin-4	Strn4	-	3.45386e+06
P58281	Dynamin-like 120 kDa protein, mitochondrial	Opa1	-	6.8993e+07
P57787	Monocarboxylate transporter 4	Slc16a3	-	3.81103e+06
P56960	Exosome component 10	Exosc10	-	8.14888e+07
P56546	C-terminal-binding protein 2	Ctbp2	-	3.41632e+07
P56399	Ubiquitin carboxyl-terminal hydrolase 5	Usp5	-	1.69861e+08
P55302	Alpha-2-macroglobulin receptor-associated protein	Lrpap1	-	3.43312e+07
P55264	Adenosine kinase	Adk	-	3.31542e+06
P55194	SH3 domain-binding protein 1	Sh3bp1	-	1.85386e+06
P54823	Probable ATP-dependent RNA helicase DDX6	Ddx6	0	3.82844e+07
P54822	Adenylosuccinate lyase	Adsl	0	11411213
P54731	FAS-associated factor 1	Faf1	0	2.50486e+08
P54729	NEDD8 ultimate buster 1	Nub1	-	7.30032e+07
P54728	UV excision repair protein RAD23 homolog B	Rad23b	-	4.75478e+06
P54310	Hormone-sensitive lipase	Lipe	-	3.97685e+06
P54227	Stathmin	Stmn1	-	5.78197e+06
P54103	DnaJ homolog subfamily C member 2	Dnajc2	-	1.86553e+08
P54071	Isocitrate dehydrogenase [NADP], mitochondrial	Idh2	-	9383876
P53996	CCHC-type zinc finger nucleic acid binding protein	Cnbp	-	4.41349e+06
P53811	Phosphatidylinositol transfer protein beta isoform	Pitpnb	-	3.1515e+06
P53762	Aryl hydrocarbon receptor nuclear translocator	Arnt	-	1.74937e+06
P53395	Lipoamide acyltransferase component of branched-chain alpha-keto acid dehydrogenase complex, mitochondrial	Dbt	-	9.85303e+06
P52624	Uridine phosphorylase 1	Upp1	-	6.57619e+07
P52293	Importin subunit alpha-1	Kpna2	-	2.84701e+07
P51863	V-type proton ATPase subunit d 1	Atp6v0d1	-	3.62691e+06
P51859	Hepatoma-derived growth factor	Hdgf	0	5989772
P51855	Glutathione synthetase	Gss	-	3.64298e+06
P51660	Peroxisomal multifunctional enzyme type 2	Hsd17b4	-	1.14346e+08
P51150	Ras-related protein Rab-7a	Rab7a	0	15873961
P50516	V-type proton ATPase catalytic subunit A	Atp6v1a	-	101574640
P50431	Serine hydroxymethyltransferase, cytosolic	Shmt1	-	4.09693e+07
P50396	Rab GDP dissociation inhibitor alpha	Gdi1	-	3.9031e+06
P50247	Adenosylhomocysteinase	Ahcy	0	1.70981e+08
P50136	2-oxoisovalerate dehydrogenase subunit alpha, mitochondrial	Bckdha	-	11801546
P49945	Ferritin light chain 2	Ftl2	-	2.21961e+07
P49182	Heparin cofactor 2	Serpind1	-	5.14632e+06
P48758	Carbonyl reductase [NADPH] 1	Cbr1	-	2.4255e+06
P48678	Prelamin-A/C	Lmna	-	63841793
P48432	Transcription factor SOX-2	Sox2	-	1.56182e+06
P48377	MHC class II regulatory factor RFX1	Rfx1	-	2961964
P47857	ATP-dependent 6-phosphofructokinase, muscle type	Pfkm	-	28133118
P47856	Glutamine--fructose-6-phosphate aminotransferase [isomerizing] 1	Gfpt1	-	1.5682e+07
P47791	Glutathione reductase, mitochondrial	Gsr	-	10775036
P47757	F-actin-capping protein subunit beta	Capzb	0	6372240
P46978	Dolichyl-diphosphooligosaccharide--protein glycosyltransferase subunit STT3A	Stt3a	-	4.3027e+06
P46938	Transcriptional coactivator YAP1	Yap1	-	3.72329e+06
P46471	26S proteasome regulatory subunit 7	Psmc2	-	1.63048e+07
P46467	Vacuolar protein sorting-associated protein 4B	Vps4b	-	1.69929e+06
P46460	Vesicle-fusing ATPase	Nsf	-	1.68065e+08
P46425	Glutathione S-transferase P 2	Gstp2	-	3.64167e+06
P46061	Ran GTPase-activating protein 1	Rangap1	-	1303191891
P45952	Medium-chain specific acyl-CoA dehydrogenase, mitochondrial	Acadm	-	5700424
P45377	Aldose reductase-related protein 2	Akr1b8	-	9.44848e+06
P43277	Histone H1.3	H1-3	-	3.76328e+06
P42669	Transcriptional activator protein Pur-alpha	Pura	-	3.70682e+06
P42227	Signal transducer and activator of transcription 3	Stat3	-	79575633
P42225	Signal transducer and activator of transcription 1	Stat1	-	7.76439e+06
P42208	Septin-2	Septin2	-	3.07724e+07
P41731	CD63 antigen	Cd63	-	2.24852e+07
P40124	Adenylyl cyclase-associated protein 1	Cap1	0	1.5097e+07
P39749	Flap endonuclease 1	Fen1	-	2.07249e+07
P39054	Dynamin-2	Dnm2	-	6.39818e+07
P39053	Dynamin-1	Dnm1	-	1.67333e+06
P37040	NADPH--cytochrome P450 reductase	Por	-	1.19865e+08
P36993	Protein phosphatase 1B	Ppm1b	-	3.83189e+06
P36916	Guanine nucleotide-binding protein-like 1	Gnl1	-	1.21169e+08
P35922	Fragile X messenger ribonucleoprotein 1	Fmr1	-	1.297e+08
P35761	Dual specificity protein kinase TTK	Ttk	-	4.63366e+07
P35486	Pyruvate dehydrogenase E1 component subunit alpha, somatic form, mitochondrial	Pdha1	-	2.26723e+07
P35278	Ras-related protein Rab-5C	Rab5c	-	3027523
P33611	DNA polymerase alpha subunit B	Pola2	-	4.37334e+06
P32921	Tryptophan--tRNA ligase, cytoplasmic	Wars1	-	6597132
P32261	Antithrombin-III	Serpinc1	-	1.05488e+07
P31938	Dual specificity mitogen-activated protein kinase kinase 1	Map2k1	-	1.02919e+07
P31362	POU domain, class 2, transcription factor 3	Pou2f3	-	2.20634e+06
P31266	Recombining binding protein suppressor of hairless	Rbpj	-	5.52847e+07
P31230	Aminoacyl tRNA synthase complex-interacting multifunctional protein 1	Aimp1	-	6764449
P30999	Catenin delta-1	Ctnnd1	-	4.77745e+07
P30276	G2/mitotic-specific cyclin-B2	Ccnb2	-	964338
P30275	Creatine kinase U-type, mitochondrial	Ckmt1	-	2283427
P29758	Ornithine aminotransferase, mitochondrial	Oat	-	1.73627e+06
P29595	NEDD8	Nedd8	-	3481068
P28867	Protein kinase C delta type	Prkcd	-	3.3674e+06
P28741	Kinesin-like protein KIF3A	Kif3a	-	26951050
P28740	Kinesin-like protein KIF2A	Kif2a	-	4.30601e+07
P28660	Nck-associated protein 1	Nckap1	-	3.91201e+07
P28659	CUGBP Elav-like family member 1	Celf1	-	1.52458e+07
P28658	Ataxin-10	Atxn10	-	3.34619e+07
P28474	Alcohol dehydrogenase class-3	Adh5	-	3.84829e+07
P28271	Cytoplasmic aconitate hydratase	Aco1	-	4.03853e+07
P28028	Serine/threonine-protein kinase B-raf	Braf	-	2.29189e+07
P27641	X-ray repair cross-complementing protein 5	Xrcc5	-	2.05816e+08
P27612	Phospholipase A-2-activating protein	Plaa	-	2.02297e+08
P27048	Small nuclear ribonucleoprotein-associated protein B	Snrpb	-	4205677
P26883	Peptidyl-prolyl cis-trans isomerase FKBP1A	Fkbp1a	-	5886215
P26645	Myristoylated alanine-rich C-kinase substrate	Marcks	-	6.02638e+06
P26450	Phosphatidylinositol 3-kinase regulatory subunit alpha	Pik3r1	-	3021559
P26443	Glutamate dehydrogenase 1, mitochondrial	Glud1	0	1.23423e+08
P26369	Splicing factor U2AF 65 kDa subunit	U2af2	-	1.26944e+08
P26043	Radixin	Rdx	-	3.36266e+08
P25976	Nucleolar transcription factor 1	Ubtf	-	5.43196e+08
P24860	G2/mitotic-specific cyclin-B1	Ccnb1	-	2.12654e+06
P24788	Cyclin-dependent kinase 11B	Cdk11b	-	1.0008e+07
P24527	Leukotriene A-4 hydrolase	Lta4h	-	1.70749e+07
P24472	Glutathione S-transferase A4	Gsta4	-	7.07855e+07
P24288	Branched-chain-amino-acid aminotransferase, cytosolic	Bcat1	-	15656050
P23492	Purine nucleoside phosphorylase	Pnp	-	2416556
P23475	X-ray repair cross-complementing protein 6	Xrcc6	-	1.48478e+07
P23249	Putative helicase MOV-10	Mov10	-	3.31247e+08
P23198	Chromobox protein homolog 3	Cbx3	-	1.64135e+07
P22892	AP-1 complex subunit gamma-1	Ap1g1	-	1.11939e+08
P21995	Embigin	Emb	-	8.8945e+06
P21981	Protein-glutamine gamma-glutamyltransferase 2	Tgm2	-	9559539
P21956	Lactadherin	Mfge8	-	1.52563e+07
P21619	Lamin-B2	Lmnb2	-	27415090
P21550	Beta-enolase	Eno3	-	2.30041e+06
P20263	POU domain, class 5, transcription factor 1	Pou5f1	-	2.91175e+06
P20060	Beta-hexosaminidase subunit beta	Hexb	-	8.60704e+06
P19783	Cytochrome c oxidase subunit 4 isoform 1, mitochondrial	Cox4i1	-	1.80047e+07
P19324	Serpin H1	Serpinh1	-	2.4828e+07
P19221	Prothrombin	F2	-	12134043
P18654	Ribosomal protein S6 kinase alpha-3	Rps6ka3	-	1.68029e+07
P18653	Ribosomal protein S6 kinase alpha-1	Rps6ka1	-	1.75756e+08
P18242	Cathepsin D	Ctsd	-	3.19664e+06
P17918	Proliferating cell nuclear antigen	Pcna	0	9.55446e+07
P17809	Solute carrier family 2, facilitated glucose transporter member 1	Slc2a1	0	6740148
P17742	Peptidyl-prolyl cis-trans isomerase A	Ppia	0	1.69352e+08
P17710	Hexokinase-1	Hk1	-	4.57239e+07
P17427	AP-2 complex subunit alpha-2	Ap2a2	-	8.51735e+07
P17426	AP-2 complex subunit alpha-1	Ap2a1	-	4.11158e+07
P17095	High mobility group protein HMG-I/HMG-Y	Hmga1	-	4.94283e+06
P17047	Lysosome-associated membrane glycoprotein 2	Lamp2	-	2.14743e+06
P16627	Heat shock 70 kDa protein 1-like	Hspa1l	-	2920873
P16381	Putative ATP-dependent RNA helicase Pl10	D1Pas1	-	7.96972e+06
P16332	Methylmalonyl-CoA mutase, mitochondrial	Mmut	-	87750522
P16110	Galectin-3	Lgals3	-	4.95664e+06
P15532	Nucleoside diphosphate kinase A	Nme1	-	4.11659e+06
P14901	Heme oxygenase 1	Hmox1	-	1.90829e+07
P14824	Annexin A6	Anxa6	-	4.50796e+07
P14576	Signal recognition particle subunit SRP54	Srp54	0	1.57495e+07
P14152	Malate dehydrogenase, cytoplasmic	Mdh1	-	1.73141e+07
P14094	Sodium/potassium-transporting ATPase subunit beta-1	Atp1b1	0	23512837
P13541	Myosin-3	Myh3	-	41018264
P13439	Uridine 5-monophosphate synthase	Umps	0	53209147
P13020	Gelsolin	Gsn	-	2.88514e+07
P12382	ATP-dependent 6-phosphofructokinase, liver type	Pfkl	0	1.19974e+08
P11531	Dystrophin	Dmd	-	1.09931e+07
P11440	Cyclin-dependent kinase 1	Cdk1	-	1.47506e+07
P11157	Ribonucleoside-diphosphate reductase subunit M2	Rrm2	-	2.14628e+07
P11031	Activated RNA polymerase II transcriptional coactivator p15	Sub1	-	2.99331e+06
P10649	Glutathione S-transferase Mu 1	Gstm1	-	18387122
P10630	Eukaryotic initiation factor 4A-II	Eif4a2	0	9.48348e+06
P10605	Cathepsin B	Ctsb	-	1.25641e+06
P10107	Annexin A1	Anxa1	0	3740672
P09242	Alkaline phosphatase, tissue-nonspecific isozyme	Alpl	-	1.68339e+07
P08752	Guanine nucleotide-binding protein G(i) subunit alpha-2	Gnai2	-	6.48433e+06
P08003	Protein disulfide-isomerase A4	Pdia4	-	744214229
P06240	Proto-oncogene tyrosine-protein kinase LCK	Lck	-	7484916
P05201	Aspartate aminotransferase, cytoplasmic	Got1	0	4.55727e+08
P02088	Hemoglobin subunit beta-1	Hbb-b1	-	2.96213e+06
P01029	Complement C4-B	C4b	-	3.70352e+06
P00329	Alcohol dehydrogenase 1	Adh1	-	7.07888e+06
O89090	Transcription factor Sp1	Sp1	-	1.51879e+07
O89050	Muskelin	Mkln1	-	8985519
O88958	Glucosamine-6-phosphate isomerase 1	Gnpda1	-	915034
O88874	Cyclin-K	Ccnk	-	1.22841e+08
O88844	Isocitrate dehydrogenase [NADP] cytoplasmic	Idh1	-	46605599
O88708	Origin recognition complex subunit 4	Orc4	-	872678
O88685	26S proteasome regulatory subunit 6A	Psmc3	-	1.82217e+07
O88665	Bromodomain-containing protein 7	Brd7	-	3816089
O88544	COP9 signalosome complex subunit 4	Cops4	-	4.10643e+06
O88508	DNA (cytosine-5)-methyltransferase 3A	Dnmt3a	-	2.68362e+07
O88487	Cytoplasmic dynein 1 intermediate chain 2	Dync1i2	-	129118409
O88456	Calpain small subunit 1	Capns1	-	882417
O88448	Kinesin light chain 2	Klc2	-	6756442
O88342	WD repeat-containing protein 1	Wdr1	-	3.2077e+07
O88291	DBIRD complex subunit ZNF326	Znf326	-	1.36422e+07
O88271	Craniofacial development protein 1	Cfdp1	0	6.49332e+06
O70551	SRSF protein kinase 1	Srpk1	-	1.17845e+08
O70492	Sorting nexin-3	Snx3	-	4.23743e+06
O70475	UDP-glucose 6-dehydrogenase	Ugdh	-	3.91942e+06
O70445	BRCA1-associated RING domain protein 1	Bard1	-	1.75496e+06
O70435	Proteasome subunit alpha type-3	Psma3	-	4.66892e+06
O70325	Phospholipid hydroperoxide glutathione peroxidase	Gpx4	-	1.95601e+07
O70310	Glycylpeptide N-tetradecanoyltransferase 1	Nmt1	-	3.08816e+08
O70305	Ataxin-2	Atxn2	-	1.9688e+06
O70194	Eukaryotic translation initiation factor 3 subunit D	Eif3d	-	4.4924e+07
O70161	Phosphatidylinositol 4-phosphate 5-kinase type-1 gamma	Pip5k1c	-	2186714
O55234	Proteasome subunit beta type-5	Psmb5	-	37222200
O55135	Eukaryotic translation initiation factor 6	Eif6	-	8.22321e+06
O55131	Septin-7	Septin7	-	1.27834e+07
O55128	Histone deacetylase complex subunit SAP18	Sap18	-	2.17478e+06
O55047	Serine/threonine-protein kinase tousled-like 2	Tlk2	-	1.88713e+07
O54946	DnaJ homolog subfamily B member 6	Dnajb6	-	3.34199e+06
O54825	Bystin	Bysl	-	8218023
O54734	Dolichyl-diphosphooligosaccharide--protein glycosyltransferase 48 kDa subunit	Ddost	-	1.77877e+07
O54692	Centromere/kinetochore protein zw10 homolog	Zw10	-	1.01504e+08
O35857	Mitochondrial import inner membrane translocase subunit TIM44	Timm44	-	7.25293e+06
O35855	Branched-chain-amino-acid aminotransferase, mitochondrial	Bcat2	-	2.42045e+06
O35841	Apoptosis inhibitor 5	Api5	-	1.80136e+07
O35737	Heterogeneous nuclear ribonucleoprotein H	Hnrnph1	-	2.03843e+07
O35685	Nuclear migration protein nudC	Nudc	-	8.62277e+07
O35658	Complement component 1 Q subcomponent-binding protein, mitochondrial	C1qbp	-	6789361
O35643	AP-1 complex subunit beta-1	Ap1b1	-	1.39174e+07
O35609	Secretory carrier-associated membrane protein 3	Scamp3	-	45103192
O35465	Peptidyl-prolyl cis-trans isomerase FKBP8	Fkbp8	-	13427478
O35382	Exocyst complex component 4	Exoc4	-	1.05932e+07
O35381	Acidic leucine-rich nuclear phosphoprotein 32 family member A	Anp32a	-	4922214
O35350	Calpain-1 catalytic subunit	Capn1	-	2.22009e+07
O35344	Importin subunit alpha-4	Kpna3	-	7.40128e+06
O35326	Serine/arginine-rich splicing factor 5	Srsf5	-	3432783
O35286	ATP-dependent RNA helicase DHX15	Dhx15	-	6.99997e+08
O35280	Serine/threonine-protein kinase Chk1	Chek1	-	1.83945e+06
O35226	26S proteasome non-ATPase regulatory subunit 4	Psmd4	-	1.64223e+07
O35218	Cleavage and polyadenylation specificity factor subunit 2	Cpsf2	-	2.95044e+07
O35215	D-dopachrome decarboxylase	Ddt	-	1578541
O35114	Lysosome membrane protein 2	Scarb2	-	7.64768e+06
O09117	Synaptophysin-like protein 1	Sypl1	-	1.72626e+06
O09106	Histone deacetylase 1	Hdac1	0	9013227
O09012	Peroxisomal targeting signal 1 receptor	Pex5	-	1.22242e+07
O08856	RNA polymerase II elongation factor ELL	Ell	-	3.54944e+07
O08811	General transcription and DNA repair factor IIH helicase subunit XPD	Ercc2	-	2.09404e+06
O08807	Peroxiredoxin-4	Prdx4	-	1.08917e+07
O08795	Glucosidase 2 subunit beta	Prkcsh	-	241876570
O08759	Ubiquitin-protein ligase E3A	Ube3a	-	4.64713e+07
O08756	3-hydroxyacyl-CoA dehydrogenase type-2	Hsd17b10	-	11301879
O08749	Dihydrolipoyl dehydrogenase, mitochondrial	Dld	-	1.73077e+07
O08709	Peroxiredoxin-6	Prdx6	-	1.35863e+07
O08582	GTP-binding protein 1	Gtpbp1	-	4.17825e+07
O08553	Dihydropyrimidinase-related protein 2	Dpysl2	-	44812860
O08550	Histone-lysine N-methyltransferase 2B	Kmt2b	-	32746925
O08529	Calpain-2 catalytic subunit	Capn2	-	2.39354e+07
O08528	Hexokinase-2	Hk2	0	2.23227e+08
E9Q8D0	DnaJ homolog subfamily C member 21	Dnajc21	-	8.46928e+07
E9Q5G3	Kinesin-like protein KIF23	Kif23	-	1.04688e+06
E9PYI1	Zinc finger protein 568	Znf568	-	1.50163e+06
D3Z6Q9	Bridging integrator 2	Bin2	-	3.46448e+06
C0HKD9	Microfibrillar-associated protein 1B	Mfap1b	-	48924203
B9EJR8	Dynein axonemal assembly factor 5	Dnaaf5	-	6.84782e+07
B2RY56	RNA-binding protein 25	Rbm25	-	3.61029e+07
B2RXS4	Plexin-B2	Plxnb2	-	8248986
B2RUI1	Zinc finger protein 551	Znf551	-	1.90731e+06
B2RS91	RNA polymerase I-specific transcription initiation factor RRN3	Rrn3	-	5.93207e+06
B1AY10	Transcriptional repressor NF-X1	Nfx1	-	1.59664e+07
B1AX39	Zinc finger CCHC domain-containing protein 7	Zcchc7	-	2.64581e+06
A8Y5H7	SEC14-like protein 1	Sec14l1	-	5151430
A6X935	Inter alpha-trypsin inhibitor, heavy chain 4	Itih4	-	1.46713e+07
A6H5Z3	Exocyst complex component 6B	Exoc6b	-	1.13278e+07
A2BE28	Ribosomal biogenesis protein LAS1L	Las1l	-	2.77445e+07
A2ATU0	2-oxoadipate dehydrogenase complex component E1	Dhtkd1	-	16842496
A2ASS6	Titin	Ttn	-	9569973
A2AQ19	RNA polymerase-associated protein RTF1 homolog	Rtf1	-	8.80866e+06
A2AQ07	Tubulin beta-1 chain	Tubb1	-	91382744
A2APB8	Targeting protein for Xklp2	Tpx2	-	3.65283e+07
A2AJ15	Endoplasmic reticulum mannosyl-oligosaccharide 1,2-alpha-mannosidase	Man1b1	-	2125097
A2AG58	BCLAF1 and THRAP3 family member 3	Bclaf3	-	1.21337e+07
A2A8Z1	Oxysterol-binding protein-related protein 9	Osbpl9	-	6.46091e+06
A2A6Q5	Cell division cycle protein 27 homolog	Cdc27	-	9.85597e+06
A1A5B6	TBC1 domain family member 25	Tbc1d25	-	2508430
A0A1D9BZF0	Germ cell nuclear acidic protein	Gcna	-	7.37326e+07
