# Supplementary material for: ZFP560 facilitates KAP1-dependent chromatin repression to regulate exit from totipotency
Source: Research Square preprint supplement (doi:10.21203/rs.3.rs-7290036/v1), 2025-08-25
Supplement: Supplementary file 11 [file d8cc12e54d6b6cc4cc4a5c1c.xlsx]

## Sheet: 8CLCs
gene	LEUTX_mCherry_neg	LEUTX_mCherry_pos	prEpiSC	ci8CLC
ZBED3	6.95288	7.64862	7.44904	5.21706
ZBED4	28.7097	23.4235	32.2074	18.6625
ZBED5	8.40387	10.0129	10.9359	9.86272
ZBED6	0.00742311	0.163234	0.125788	0.131616
ZBTB1	13.8893	16.5583	20.5672	22.9305
ZBTB10	26.6625	32.8179	41.5597	30.1955
ZBTB11	11.6684	14.3713	22.6566	24.013
ZBTB12	1.18589	1.2224	3.0863	14.5091
ZBTB16	0.0290797	0	0.149269	1.12869
ZBTB17	21.829	20.8718	17.7759	31.7967
ZBTB2	47.6824	43.5386	41.9723	36.8212
ZBTB22	22.578	20.377	12.4808	24.1914
ZBTB24	35.6725	40.2602	31.4059	35.4569
ZBTB25	2.59859	2.21783	5.27419	4.67378
ZBTB26	4.07833	4.4021	7.101	7.89639
ZBTB3	6.92068	6.98029	7.92818	8.29061
ZBTB32	1.75892	1.81306	0.185135	0.522819
ZBTB33	13.1831	16.9921	40.6441	27.0685
ZBTB34	7.48924	7.07405	10.0641	10.8365
ZBTB37	3.31293	4.70367	7.16886	7.3301
ZBTB38	11.5915	17.1202	10.6003	7.6926
ZBTB39	42.8208	35.4492	39.8017	32.2232
ZBTB4	11.7547	13.3521	14.9029	31.4105
ZBTB40	21.2194	18.6646	21.9272	26.9842
ZBTB41	1.10372	3.15283	5.41195	7.17738
ZBTB43	11.5481	8.66701	12.8937	17.3899
ZBTB44	23.9766	25.9005	33.5635	18.4803
ZBTB45	51.1011	49.0524	37.5677	34.1246
ZBTB46	16.1885	17.2948	12.7967	4.50964
ZBTB48	13.5171	11.9145	14.3037	13.9185
ZBTB49	9.94144	8.77094	6.62092	4.93747
ZBTB5	11.7341	12.0545	20.1183	30.5941
ZBTB6	7.45884	10.5308	16.9308	16.1613
ZBTB7A	10.8318	9.12489	16.8206	24.0762
ZBTB7B	29.562	28.26	36.7053	61.6646
ZBTB8A	3.33831	3.16668	4.59621	3.42229
ZBTB8B	0.722062	0.446573	0.83495	0.521087
ZBTB8OS	40.4071	44.5358	60.5188	32.2001
ZC3H11A	0.0434354	0.0397977	0.0272543	0.0473357
ZC3H12A	11.8095	9.76314	13.7988	25.6635
ZC3H12B	3.39634	3.54561	1.67887	2.44863
ZC3H12C	2.39079	3.07555	3.08504	4.34777
ZC3H13	30.2899	53.9971	53.0241	49.8571
ZC3H14	12.266	14.1353	14.8038	17.2551
ZC3H15	84.3505	123.167	148.653	156.216
ZC3H18	65.9612	61.1044	58.9064	53.371
ZC3H3	55.7729	55.2996	43.7077	30.3217
ZC3H6	0.125624	0.0863273	0.627988	1.4358
ZC3H7A	28.7107	29.9458	26.6374	34.3604
ZC3H7B	55.4812	54.4208	50.0638	60.7766
ZC3H8	3.42566	4.72751	4.53963	3.38179
ZC3HAV1	80.6073	86.2328	66.8458	58.0393
ZC3HC1	25.6312	23.7665	18.9547	20.0228
ZC4H2	4.44165	4.33222	1.57288	4.6098
ZCCHC10	25.6329	33.836	40.733	27.3526
ZCCHC12	0.337361	0.347746	0.518989	1.86782
ZCCHC13	0	0	0	0
ZCCHC14	16.9044	15.2909	16.2755	10.7945
ZCCHC17	55.608	54.8174	41.9329	34.0684
ZCCHC2	4.52603	4.39165	7.32212	12.3744
ZCCHC3	7.48585	7.78272	11.3524	14.6295
ZCCHC4	7.81342	7.64978	15.3917	11.8904
ZCCHC7	20.0056	23.2529	29.1029	19.1606
ZCCHC8	26.5839	28.3024	35.5862	20.6605
ZCCHC9	18.1142	19.013	18.3348	14.8204
ZCRB1	46.9319	51.5494	61.0001	45.9123
ZCWPW1	2.03836	1.57343	1.65672	1.71454
ZCWPW2	0.0817541	0	0.0628843	0.0217349
ZDBF2	4.13902	14.1572	13.6979	14.2243
ZDHHC1	1.98905	2.58982	2.44054	12.6043
ZDHHC11	1.15926	2.14266	3.28563	5.01255
ZDHHC12	66.1668	65.3832	42.3353	27.2531
ZDHHC13	4.82404	4.56225	6.88272	8.56146
ZDHHC14	0.233034	0.0915076	0.179806	0.433828
ZDHHC15	0.407542	0.448092	0.428015	1.12705
ZDHHC16	69.3258	65.0701	50.707	50.7479
ZDHHC17	6.5064	11.8072	14.3781	15.8255
ZDHHC18	36.3804	32.7427	33.1226	32.3754
ZDHHC2	0.23597	0.141886	0.585866	1.7683
ZDHHC20	47.1383	61.3135	60.6034	46.3595
ZDHHC21	1.61195	2.51261	2.49975	3.09192
ZDHHC23	24.8168	25.4737	25.1817	17.0141
ZDHHC24	7.07441	6.15718	5.28713	3.08756
ZDHHC3	25.3028	24.7921	20.9526	31.6177
ZDHHC4	21.5145	20.5837	20.2982	13.858
ZDHHC5	137.161	128.061	127.509	168.528
ZDHHC6	31.9126	29.4211	37.4447	37.8434
ZDHHC7	109.243	100.04	97.5007	77.1343
ZDHHC8	19.7432	18.0821	27.496	29.2756
ZDHHC9	49.9552	48.6454	79.5608	69.2647
ZEB1	0	0	3.86758	20.9611
ZFAND1	16.0496	20.6984	33.4318	15.5642
ZFAND2A	9.74812	10.8855	10.4249	11.4497
ZFAND2B	14.6415	14.9891	20.3486	20.9985
ZFAND3	116.661	122.585	95.6369	126.115
ZFAND5	78.0392	84.42	79.2923	92.2762
ZFAND6	39.213	46.678	41.4643	43.712
ZFAT	4.08067	4.10613	3.30333	3.87065
ZFC3H1	8.60369	19.9756	29.7796	34.6269
ZFHX3	2.34242	2.95156	9.46561	16.0285
ZFHX4	0.52591	0.626425	2.76256	20.9891
ZFP1	4.21462	4.94562	10.4863	7.57684
ZFP14	1.16121	1.31909	2.06021	1.15187
ZFP2	0.456739	1.83491	1.7265	1.56786
ZFP28	6.69551	7.35806	5.68536	7.04888
ZFP3	19.8412	17.2603	17.2757	22.1385
ZFP30	6.7577	10.4775	11.2552	11.7374
ZFP36	4.79372	3.35753	8.2965	22.813
ZFP36L1	44.7439	43.6288	84.7568	255.846
ZFP36L2	99.1956	91.5431	123.663	222.092
ZFP37	0.554079	1.34267	1.57357	2.35566
ZFP41	6.59663	5.41763	4.55254	2.8762
ZFP42	555.223	569.109	498.325	399.034
ZFP57	56.9079	51.3716	65.7226	59.4214
ZFP62	8.9182	10.2242	15.3564	27.7304
ZFP64	27.2895	26.9481	21.7129	19.2394
ZFP82	8.47975	10.0767	12.0775	10.2509
ZFP90	4.34514	4.24745	6.74071	5.94534
ZFP91	25.6161	23.3458	31.3693	30.9816
ZFPL1	4.89964	4.12199	3.33815	3.27831
ZFPM1	3.17246	2.99631	2.71672	4.86767
ZFPM2	0	0	1.11678	7.65644
ZFR	58.6591	64.2212	68.2363	121.595
ZFR2	3.47235	2.86766	2.27501	1.6521
ZFX	12.5383	16.9927	11.0522	20.804
ZFY	0	0.0458279	0.167208	0.806071
ZFYVE1	17.4125	18.9354	18.3409	41.513
ZFYVE16	2.72142	6.81465	8.87941	7.17078
ZFYVE19	12.2135	10.2047	14.7488	15.8805
ZFYVE21	9.15435	8.52933	11.0764	8.17849
ZFYVE26	13.6517	14.4652	12.8609	13.7543
ZFYVE27	25.6867	21.5215	23.3969	30.0618
ZFYVE28	0.0192535	0.0793846	0.0778929	0.0480023
ZFYVE9	75.2634	75.8649	75.7002	70.5411
ZHX1	0.275205	1.09688	5.21742	21.2672
ZHX2	0.374503	0.400328	1.67777	6.58503
ZHX3	3.93042	4.39381	3.98468	3.22072
ZIC1	3.90953	2.81718	9.34335	12.6792
ZIC2	2.985	3.8703	4.82146	16.4934
ZIC3	55.8308	51.9642	40.3764	18.8722
ZIC5	1.51783	1.67435	2.25159	3.16631
ZIK1	34.0399	30.5883	23.6069	21.9594
ZIM2	0.423049	0.332245	0.487682	0.84139
ZIM3	0.070535	0.58165	0	2.4101
ZKSCAN1	6.8056	5.96005	11.4561	10.1032
ZKSCAN2	6.38099	5.63663	6.25448	4.94683
ZKSCAN3	5.3421	6.01677	4.82961	5.16121
ZKSCAN4	3.53538	3.88239	2.99014	6.33715
ZKSCAN5	20.3623	19.8905	15.0653	17.1346
ZMAT2	206.872	199.081	197.573	224.231
ZMAT3	18.2212	22.8676	15.9332	27.4309
ZMAT4	0	0.137993	0	0.0800795
ZMAT5	2.63467	2.90478	2.06898	9.7392
ZMIZ1	47.2531	43.9944	55.5816	78.6851
ZMIZ2	37.7193	35.7377	40.9114	50.139
ZMPSTE24	93.7254	95.0461	102.754	90.2459
ZMYM1	12.9938	27.6438	42.0524	30.6362
ZMYM2	13.9604	21.0663	37.2888	39.689
ZMYM3	73.4645	74.7869	58.0877	73.0119
ZMYM4	42.1501	58.1631	51.8559	44.3937
ZMYM5	7.28551	10.3206	10.0324	7.57604
ZMYM6	1.81074	2.63502	3.51902	3.04869
ZMYND10	0.256553	0.528901	0.698038	0.175589
ZMYND11	5.17429	6.60689	11.1358	32.2721
ZMYND12	0.084959	0.116766	0.733955	0.603311
ZMYND19	89.5879	77.8796	91.6733	87.6927
ZMYND8	75.1389	76.7838	74.2935	72.8698
ZNF10	4.64827	6.45741	8.9476	6.72368
ZNF100	11.9236	36.93	43.423	29.0093
ZNF101	24.8567	22.6909	24.3636	16.8613
ZNF107	7.29592	27.6818	27.4024	22.794
ZNF114	26.1898	26.5734	35.2166	21.0464
ZNF117	1.56854	5.47873	5.39364	3.8041
ZNF12	9.82021	14.2385	22.6997	15.2282
ZNF121	32.7097	39.6521	65.268	48.5207
ZNF124	6.35838	9.69725	8.33566	8.33432
ZNF131	19.6697	21.6209	28.7863	26.4927
ZNF132	2.89357	2.06207	3.1991	3.41561
ZNF133	5.31026	5.37398	7.63546	6.38557
ZNF134	42.565	44.3274	40.1324	36.1332
ZNF135	3.69552	4.06719	3.61105	3.33425
ZNF136	9.40098	11.4367	11.8041	13.0848
ZNF138	18.0419	57.4115	70.9488	33.5711
ZNF14	7.84833	7.43455	14.2051	8.68722
ZNF140	10.0854	11.1837	10.5144	7.47884
ZNF141	4.1013	9.2273	12.277	9.78611
ZNF142	32.4281	28.5288	28.1344	30.1679
ZNF143	21.1321	23.9164	21.5771	26.3236
ZNF146	195.575	377.76	181.795	220.94
ZNF148	5.40606	9.17606	11.7677	24.9642
ZNF154	9.95725	7.53343	13.8625	9.18937
ZNF155	1.87709	2.46926	2.90323	2.53211
ZNF157	3.99688	4.11991	5.48021	4.93196
ZNF16	8.88088	9.36092	5.78154	4.82992
ZNF160	8.54524	11.8042	14.7457	8.31126
ZNF165	5.34365	6.33119	4.68382	6.47494
ZNF169	3.20744	3.42059	3.4868	3.53286
ZNF17	7.88073	7.64945	7.35703	6.36167
ZNF174	27.8585	29.3879	21.4834	12.7723
ZNF175	3.71191	3.46975	3.7085	3.50221
ZNF177	0.0622006	0	0.0248439	0.0829753
ZNF18	6.28648	6.62969	8.03993	10.3982
ZNF180	9.06527	11.8468	10.599	9.63749
ZNF181	1.68558	3.55622	3.63543	1.84985
ZNF182	3.71934	7.66766	7.4884	7.72276
ZNF184	5.28229	6.77042	5.8489	5.43578
ZNF185	3.38861	4.28677	2.19287	1.73593
ZNF189	10.3092	13.2043	8.77483	9.99697
ZNF19	0.743191	0.303666	0.449244	0.614482
ZNF195	12.824	22.4526	32.1519	22.1572
ZNF197	5.48123	6.16358	5.16377	5.89059
ZNF2	3.2691	2.93159	3.15357	3.4021
ZNF20	0.339286	0.248697	0.386787	0.736818
ZNF200	19.1276	21.2787	15.2831	12.2084
ZNF202	17.247	13.0572	13.3112	12.6831
ZNF205	34.7926	37.0522	31.8692	28.0984
ZNF207	48.009	47.3658	48.1186	56.4941
ZNF208	22.4558	73.6171	87.9413	149.736
ZNF211	10.5605	8.03855	12.2243	9.35584
ZNF212	27.4857	23.7298	22.6966	22.5548
ZNF213	3.13475	2.5099	3.36759	3.04907
ZNF214	0.25137	0.542892	0.74074	1.17275
ZNF215	5.18505	6.65681	6.64312	6.06479
ZNF217	100.517	105.455	101.059	90.5159
ZNF219	4.96402	5.48469	5.01984	11.0691
ZNF22	5.72716	6.41811	9.4354	5.00854
ZNF221	1.87546	4.96771	4.32684	6.06736
ZNF222	5.9265	3.94535	4.6957	3.45886
ZNF224	1.6302	2.0792	2.95841	2.78644
ZNF225	2.80868	2.72692	3.44472	2.78996
ZNF226	4.6712	5.9601	7.50976	6.4157
ZNF227	10.7288	12.786	8.87336	10.4427
ZNF229	18.1253	16.3449	16.1964	14.0767
ZNF23	0.228917	0.262182	0.578481	1.06737
ZNF230	2.09257	1.39748	1.79664	1.84472
ZNF232	65.3243	62.6182	54.5203	44.0213
ZNF233	0.68611	1.00584	1.26171	0.607698
ZNF234	7.2456	6.46793	9.77521	7.34529
ZNF235	3.9757	4.18844	4.32231	4.33362
ZNF236	9.28969	10.1284	9.08803	8.46151
ZNF239	1.84631	1.42101	3.93231	1.74501
ZNF24	28.788	34.7145	37.6079	32.2485
ZNF248	0.953297	1.44994	2.14201	1.418
ZNF25	0.0435273	0	0.413042	1.70984
ZNF250	4.24389	3.27116	4.30057	3.14156
ZNF251	6.1704	6.53701	6.27652	4.7714
ZNF253	14.5896	29.814	35.4577	25.9143
ZNF254	5.69146	19.1284	22.7057	13.3436
ZNF256	37.4453	37.0402	33.8406	28.539
ZNF257	16.5647	54.4515	65.6462	53.6093
ZNF26	3.988	3.81474	4.4827	3.49729
ZNF260	9.44605	19.7936	32.6207	26.7059
ZNF263	85.0513	78.2133	60.0996	72.1741
ZNF264	7.95476	7.82367	9.36811	7.81031
ZNF266	20.8917	21.6586	18.6356	12.5774
ZNF267	5.057	17.4465	25.8658	19.9107
ZNF268	4.38426	12.5391	11.1846	10.6265
ZNF274	13.4085	12.0105	13.4766	14.328
ZNF275	5.14015	4.65757	6.14181	7.41217
ZNF276	3.55382	3.10818	4.06578	5.73067
ZNF277	6.43964	8.53327	12.843	8.76935
ZNF28	27.2749	45.1152	45.4771	32.9892
ZNF280A	11.085	14.7014	14.786	59.9734
ZNF280B	8.21636	9.9018	13.3657	9.42791
ZNF280C	4.73427	5.71048	13.3604	11.6713
ZNF280D	0.0841349	0.147169	0.502294	0.714104
ZNF281	39.5764	46.2248	55.1728	95.3873
ZNF282	41.2863	40.8982	30.0541	27.7967
ZNF283	6.02211	6.06599	7.80236	5.23527
ZNF284	0.683748	0.880993	2.07929	1.08771
ZNF285	4.34497	4.09854	5.70932	3.64459
ZNF286A	7.91498	9.18139	11.436	5.7899
ZNF286B	0.991164	1.45783	1.54272	0.833281
ZNF287	3.0006	4.04433	2.04963	1.90019
ZNF292	4.63208	14.6774	12.8027	29.7348
ZNF296	149.789	171.165	152.711	220.059
ZNF3	29.2086	31.0585	29.4898	23.0748
ZNF30	12.9606	12.6173	10.9269	8.03655
ZNF300	13.9675	19.8894	18.6708	18.1846
ZNF302	12.6857	20.0666	18.9382	15.3138
ZNF311	3.38386	2.60599	2.85315	2.96924
ZNF317	45.8651	43.7391	41.1065	44.4178
ZNF318	40.8858	38.0506	42.839	20.6849
ZNF32	9.32824	11.9484	9.37364	16.6409
ZNF320	2.65345	2.23714	3.78022	2.67332
ZNF324	13.8546	12.6344	9.54289	8.95586
ZNF324B	5.44177	6.84789	4.5941	4.57944
ZNF326	20.194	27.082	31.1254	21.0009
ZNF329	28.7283	23.696	23.3445	19.6632
ZNF330	40.9901	37.2559	51.1054	50.0922
ZNF331	12.0859	11.7839	14.6324	19.9363
ZNF333	1.40533	1.72294	1.85204	1.32657
ZNF334	2.7936	6.08378	7.18383	4.7871
ZNF335	59.3584	53.8021	51.1206	51.8448
ZNF337	0.610655	1.02286	1.28143	0.693481
ZNF33A	4.77833	9.56308	11.332	6.43399
ZNF33B	1.78405	2.94234	3.02294	1.98247
ZNF34	8.00557	9.16888	8.47581	7.94588
ZNF341	6.28178	6.69682	7.77714	6.06942
ZNF343	17.2006	18.0454	12.2342	11.2691
ZNF345	1.70086	2.06892	2.42085	2.41271
ZNF346	12.2357	11.9982	10.3157	11.8867
ZNF347	10.5422	11.8394	9.89402	7.03841
ZNF35	16.3476	17.9167	11.7646	12.7187
ZNF350	16.4	18.1383	15.7997	15.3565
ZNF354A	11.9536	17.0687	25.4379	17.8469
ZNF354B	5.27364	9.86812	10.8387	8.66629
ZNF354C	4.26341	8.44807	5.89707	5.21358
ZNF358	32.0687	29.2199	16.1343	10.3291
ZNF362	4.21624	5.04214	9.44037	40.382
ZNF365	0.24163	0.0474414	0.194799	0.276376
ZNF367	6.98565	5.90559	11.757	6.65857
ZNF37A	1.04659	3.43673	4.96165	4.39729
ZNF382	0.818516	1.64242	2.58303	1.53547
ZNF383	1.23281	1.57332	2.04247	2.38236
ZNF384	41.3616	37.9221	34.842	60.934
ZNF385A	5.65388	7.69044	21.1838	138.706
ZNF385B	0.0684126	0.329086	0.0799473	0.0547573
ZNF385D	0.110624	0.0380098	0.026386	0.144616
ZNF391	6.61222	10.2994	9.55657	7.5149
ZNF394	11.7814	11.3418	9.83126	10.4112
ZNF395	22.7632	22.7568	10.8482	9.59656
ZNF397	17.6685	16.0572	25.3493	18.5054
ZNF398	49.1075	44.6223	37.8699	32.9577
ZNF404	1.75653	2.4655	3.88754	3.34808
ZNF407	4.75779	5.86003	3.95171	5.14967
ZNF408	45.3005	41.4101	36.6629	35.7084
ZNF41	3.81514	4.01908	3.50974	3.42259
ZNF410	0.0999899	0.117792	0.137553	0.284046
ZNF414	26.4756	24.8117	15.702	13.6618
ZNF416	26.3564	24.4159	19.3682	21.2395
ZNF417	8.06015	8.13328	9.32638	10.1085
ZNF418	5.76347	3.73427	7.91169	6.00967
ZNF419	5.74999	5.50164	7.16307	5.26423
ZNF420	5.22664	8.90112	7.59681	6.61531
ZNF425	0.707814	0.972802	0.947726	1.30785
ZNF426	17.8027	19.0341	16.5594	15.0276
ZNF428	72.8416	81.8275	62.0304	59.547
ZNF429	4.31973	10.6125	13.7441	7.622
ZNF43	8.75168	21.2001	21.5159	25.1886
ZNF430	5.19457	13.5516	14.1432	9.9206
ZNF431	5.83474	10.0014	11.8459	9.06239
ZNF432	19.7027	25.9728	23.0425	25.8534
ZNF433	3.34001	2.27454	3.08547	2.55139
ZNF436	0.50331	0.5055	0.74136	1.44337
ZNF438	0.933643	1.3727	1.12124	0.615069
ZNF439	1.35226	2.05415	1.45445	1.79074
ZNF44	10.3638	12.0799	9.9047	8.88576
ZNF440	3.60385	4.63605	5.5038	5.7172
ZNF441	0.565877	1.90409	2.8146	2.98974
ZNF442	1.30628	1.56367	2.63378	1.84203
ZNF443	5.42736	4.68592	7.39467	4.0761
ZNF444	14.1507	13.8866	12.992	13.2267
ZNF445	13.1667	11.9134	14.7221	13.0342
ZNF446	2.37124	2.32784	1.62923	1.57069
ZNF449	8.5521	8.81535	16.2807	11.835
ZNF45	25.3192	20.7979	15.9593	14.5797
ZNF451	9.0311	12.8776	13.2679	9.84079
ZNF454	6.47351	7.8447	6.53683	6.05208
ZNF460	3.40056	3.43369	4.55222	5.8887
ZNF461	2.8504	2.10534	4.66937	4.33397
ZNF462	12.2821	15.1462	12.2328	21.848
ZNF467	2.80257	3.26954	3.03064	27.421
ZNF468	19.1612	22.3531	20.9276	15.9177
ZNF470	5.09707	7.9797	7.15895	7.41338
ZNF473	18.32	19.1793	12.3094	19.9864
ZNF479	0.223248	0.245461	0.305473	0.169284
ZNF48	34.6192	30.949	25.4062	28.7417
ZNF480	23.2385	70.9478	62.8334	77.9615
ZNF483	7.1044	9.05399	3.24139	2.42336
ZNF484	3.854	5.4273	4.24278	4.01934
ZNF485	2.25213	1.4409	4.87226	1.96136
ZNF486	167.776	211.874	279.044	149.136
ZNF490	3.99673	3.91822	3.892	4.57758
ZNF491	0.24176	0.29535	0.144048	0.640478
ZNF492	7.98613	24.231	17.9573	16.1114
ZNF493	3.46995	11.8204	15.586	13.0082
ZNF496	38.2169	38.8008	34.7002	21.405
ZNF497	1.80683	1.63373	0.895719	0.751822
ZNF500	11.9231	11.0099	9.61271	8.82217
ZNF501	8.10372	7.09938	8.76847	5.31204
ZNF502	16.984	20.6969	15.8075	13.1267
ZNF503	1.06957	0.397294	18.1529	81.8634
ZNF506	4.88643	9.67981	13.592	8.82393
ZNF507	14.6403	19.8154	20.2867	14.1709
ZNF510	6.03987	9.26878	10.2161	9.07534
ZNF511	20.0757	17.3004	17.2921	11.0841
ZNF512	8.25408	7.35058	7.1349	6.84161
ZNF512B	29.8914	28.8851	21.6024	21.8459
ZNF513	26.817	27.0784	37.6651	92.3138
ZNF514	2.43862	2.75454	2.99914	2.3968
ZNF516	9.2785	8.10972	14.6646	12.1463
ZNF517	10.4726	10.1953	8.69999	7.65639
ZNF518A	9.76583	36.4543	36.7303	30.6284
ZNF518B	5.34751	5.90292	8.22338	9.16584
ZNF519	0.46362	0.830765	2.14263	1.0437
ZNF521	0.297664	0.163641	6.57207	30.8312
ZNF524	18.0023	15.8172	17.0002	13.6527
ZNF526	25.0112	21.9128	26.3359	22.5894
ZNF527	4.99515	6.70693	6.22679	5.17452
ZNF528	11.4588	12.9721	13.4301	14.4413
ZNF529	5.71047	7.39673	10.3155	8.7057
ZNF530	13.5861	11.6956	9.35405	9.7856
ZNF532	72.6081	69.4785	102.458	85.4329
ZNF534	43.9929	48.1915	32.1734	38.9954
ZNF540	1.01393	1.01611	2.39224	2.29724
ZNF541	0.55728	0.711204	0.607083	0.90044
ZNF543	4.39387	4.34795	5.27117	3.62185
ZNF544	13.4812	11.9992	11.8963	8.50389
ZNF546	0.410491	0.338501	0.757819	0.658485
ZNF547	1.40218	0.499624	2.02019	2.34264
ZNF548	5.2933	4.50553	5.68741	3.79458
ZNF549	9.17592	8.67274	9.06044	5.91138
ZNF550	11.6925	11.6394	16.3406	10.582
ZNF551	38.1584	36.3885	38.1711	34.3821
ZNF552	59.1098	50.439	72.4845	51.4057
ZNF554	6.70386	5.21834	4.8197	3.89203
ZNF555	2.63561	2.236	2.78975	1.97844
ZNF556	1.07107	0.484229	0.617914	0.508053
ZNF557	9.57205	8.35767	7.63512	8.33705
ZNF558	7.8246	7.38749	9.00319	6.93514
ZNF559	10.1485	11.2634	10.1082	7.25768
ZNF560	35.576	33.6292	30.5275	25.4481
ZNF561	17.0481	17.8961	15.3022	13.118
ZNF562	5.61351	6.04298	8.05959	6.65167
ZNF564	0.0256004	0.246292	0.396866	0.194716
ZNF565	5.2734	4.09089	2.41005	3.60658
ZNF566	3.44517	5.40295	11.2701	6.51349
ZNF567	7.27611	13.019	12.451	10.847
ZNF568	6.88207	7.24571	6.72813	4.32554
ZNF569	6.33537	17.0843	11.5602	10.1384
ZNF57	3.18925	2.41078	3.70726	2.9466
ZNF570	4.19778	7.78757	11.7869	9.79986
ZNF571	4.53834	4.88321	6.56793	6.82935
ZNF573	4.14929	3.47592	5.60518	5.49932
ZNF574	45.8774	44.5079	43.2613	61.2634
ZNF575	0.776378	0.711357	0.665464	1.83942
ZNF576	13.3609	14.0465	12.4869	9.31318
ZNF577	8.82066	10.8513	9.83021	13.6708
ZNF578	21.9825	22.0113	25.0401	20.0416
ZNF580	7.22254	7.33484	6.27875	16.6711
ZNF581	106.247	113.938	103.914	77.0829
ZNF582	6.96933	7.48793	6.70147	6.19877
ZNF583	3.01163	3.82314	2.85863	4.23223
ZNF584	7.06465	8.80788	3.7153	5.31268
ZNF585A	2.91946	3.62185	5.94542	5.22926
ZNF585B	5.16212	4.64533	6.41355	5.12172
ZNF586	37.2113	33.3435	34.081	19.6124
ZNF587	16.0776	15.7932	25.9178	31.6534
ZNF589	81.9247	78.9459	84.5742	62.0507
ZNF592	18.0658	19.6519	33.1818	44.0849
ZNF593	0	0	0	0
ZNF595	63.408	72.3033	41.6869	47.932
ZNF596	2.0818	3.28505	1.571	3.37783
ZNF597	10.5777	10.822	12.5825	9.73945
ZNF598	108.934	101.725	115.412	99.5233
ZNF599	1.19915	1.01132	1.61317	1.13825
ZNF600	51.4592	71.2727	99.5916	61.5428
ZNF605	4.7154	12.7615	14.3459	12.0242
ZNF606	4.78104	4.85316	7.56464	6.12772
ZNF607	35.8929	40.6393	36.6809	25.3122
ZNF609	20.9513	19.3754	21.4799	19.6667
ZNF610	9.0611	6.49584	10.6386	3.67178
ZNF611	16.9146	19.8624	20.826	16.586
ZNF613	27.0513	32.3868	23.6467	20.9924
ZNF614	34.3701	54.3027	57.4067	45.9309
ZNF615	6.09077	9.46287	9.60868	7.41292
ZNF616	12.9144	17.1265	22.0119	16.7968
ZNF618	5.10348	5.89822	6.04324	8.69395
ZNF619	6.71153	5.92377	6.52362	5.77665
ZNF620	6.46551	6.29427	5.92464	4.67043
ZNF621	5.88437	5.01187	8.85237	12.0063
ZNF622	108.822	106.969	74.9007	106.497
ZNF623	12.3556	13.5779	10.8452	6.47308
ZNF624	1.12785	3.1752	3.70664	1.63311
ZNF625	1.93367	1.03992	3.22072	1.93262
ZNF626	4.85266	12.4445	14.4186	8.18447
ZNF627	7.05008	6.08097	10.4073	5.37153
ZNF628	62.0943	62.1667	19.8352	50.3266
ZNF629	6.73193	5.54713	3.47329	7.34137
ZNF630	1.36098	1.4202	0.48261	0.685531
ZNF638	13.1611	40.1577	42.94	35.4419
ZNF639	26.4941	27.4497	31.4036	32.8612
ZNF641	3.15969	2.5695	2.41752	2.87853
ZNF644	4.91019	17.0302	19.435	23.448
ZNF646	21.8557	19.7303	20.8011	19.223
ZNF649	93.882	88.4954	74.0303	60.1703
ZNF652	5.06881	4.84183	6.50051	9.12921
ZNF653	3.71513	4.15603	4.22882	5.58298
ZNF654	4.75222	9.58178	9.62317	14.3131
ZNF655	13.6639	22.22	21.388	16.4588
ZNF660	0.625902	0.821124	0.303107	0.760592
ZNF662	0.328927	0.276265	0.824853	3.00753
ZNF664	23.1473	22.6146	56.2772	49.9004
ZNF665	1.84052	1.94325	2.49884	1.82236
ZNF667	5.96269	6.63403	8.41107	6.91638
ZNF668	10.7909	8.85219	6.72869	7.77426
ZNF669	23.2555	21.608	20.6593	17.2381
ZNF670	9.88949	10.4063	14.6366	9.56873
ZNF671	3.3051	2.81199	4.36444	3.75776
ZNF672	21.0755	16.5761	12.9539	8.72314
ZNF674	1.82219	2.70965	3.86999	2.92614
ZNF675	21.8067	60.6168	77.1675	55.4197
ZNF676	54.3121	142.456	161.238	130.187
ZNF677	10.3074	11.6327	13.7526	13.4931
ZNF678	3.08653	9.49819	9.92846	7.08618
ZNF679	2.12848	8.85723	1.49643	11.4907
ZNF680	6.3309	24.5919	33.4322	17.2964
ZNF681	4.22099	15.1106	22.2035	9.79412
ZNF682	8.30044	17.6118	20.0545	17.6498
ZNF683	0	0.107047	0.0443558	0
ZNF684	4.81016	10.3065	9.389	10.2181
ZNF687	31.6591	30.7459	26.7003	24.6088
ZNF688	2.85023	3.28546	2.25338	5.41241
ZNF689	34.7958	31.3816	26.2594	28.4245
ZNF691	15.4716	14.3218	18.0094	16.3052
ZNF692	13.7003	11.5698	26.798	21.6469
ZNF695	16.28	27.1548	26.7121	22.8039
ZNF696	88.6528	83.4392	56.8897	53.6181
ZNF697	22.0036	19.3544	19.1267	14.7114
ZNF699	3.40109	3.47942	3.76614	4.0871
ZNF7	8.79146	8.60758	10.5229	8.39936
ZNF70	6.07417	4.71535	5.00552	5.43671
ZNF700	8.90468	11.0874	14.2772	10.6653
ZNF701	11.3992	16.0912	14.7308	12.3581
ZNF703	14.2492	15.5518	24.319	82.7618
ZNF704	1.77172	1.83262	0.781632	1.05089
ZNF705A	0.0510738	0.0701945	0.0611989	0.62605
ZNF705G	0	0	0.0492679	0
ZNF706	23.8355	24.4056	23.7561	26.0062
ZNF707	8.06843	8.83501	7.19065	9.16232
ZNF708	6.74776	22.3164	22.1388	17.4311
ZNF709	0.0976096	0.0670761	0.25509	0.301942
ZNF71	10.7513	10.4013	6.12034	4.2381
ZNF710	10.8682	10.5347	11.0503	15.5836
ZNF711	0.481383	1.09419	2.88148	1.69431
ZNF713	1.37256	1.68991	1.27858	1.05083
ZNF714	15.0857	27.5811	25.5401	16.738
ZNF716	4.97378	10.952	0.745256	1.85173
ZNF717	0.290812	0.349724	1.01397	1.74185
ZNF718	8.18179	13.7298	13.4736	11.1352
ZNF720	2.5767	3.81376	5.07797	4.5945
ZNF721	9.72874	35.7688	41.5787	54.3623
ZNF727	18.7525	27.6353	27.993	16.2133
ZNF732	17.6593	27.1736	28.371	31.1119
ZNF735	12.6284	16.8696	2.13346	10.3199
ZNF736	11.9134	15.0071	15.7753	12.7115
ZNF74	14.3618	12.222	15.0902	11.5624
ZNF740	3.94725	4.18821	6.19525	11.0094
ZNF746	12.6463	11.471	9.46877	12.57
ZNF747	5.31972	4.75557	3.86648	2.75838
ZNF749	16.2838	11.396	16.6071	15.1457
ZNF75A	16.328	20.0404	17.0575	15.0469
ZNF75D	13.2238	12.6998	22.4799	11.3991
ZNF76	14.4258	14.4381	8.39519	17.2315
ZNF761	15.362	32.1737	31.135	31.2027
ZNF763	0.586172	0.716107	0.529173	0.54465
ZNF764	15.8927	16.975	23.4367	21.8769
ZNF765	7.13657	14.006	12.1871	12.0935
ZNF766	15.0383	16.6495	20.2622	12.3588
ZNF768	40.9465	35.421	61.9162	87.339
ZNF77	6.23481	6.37448	10.0712	6.45948
ZNF770	40.7282	70.5142	71.3373	44.8236
ZNF771	4.09248	3.63679	5.46332	14.7534
ZNF772	7.18871	7.45699	8.10564	5.16011
ZNF773	3.12154	3.12299	3.57229	2.67577
ZNF774	0.435426	0.628361	0.56713	0.698826
ZNF776	17.5647	16.2259	15.1661	13.6949
ZNF777	34.407	32.8368	29.0395	44.5369
ZNF778	15.0482	12.8541	13.9941	14.2236
ZNF780A	3.62595	4.52022	5.56086	4.57106
ZNF781	3.46467	10.5464	6.30935	9.97834
ZNF782	1.80405	5.34456	4.64489	3.85039
ZNF784	14.676	11.632	14.6521	8.8759
ZNF785	4.37794	2.95704	5.17365	4.48415
ZNF786	11.4712	9.45945	9.72323	6.99553
ZNF787	65.0244	63.1828	54.2617	49.2987
ZNF789	4.58708	3.71747	6.5334	7.45072
ZNF79	12.4765	7.02488	7.34202	8.27721
ZNF790	3.10108	3.73342	4.25049	4.11054
ZNF791	25.4565	26.8967	30.1342	24.3526
ZNF792	5.4153	5.65411	3.08702	2.27182
ZNF793	5.37816	10.0322	13.908	12.6873
ZNF799	1.35627	1.08315	1.86595	1.53853
ZNF8	7.7698	6.12204	8.70372	8.57997
ZNF800	2.303	5.27531	7.82501	14.8511
ZNF804B	0	0	0	0
ZNF805	6.05869	6.74918	7.52429	7.5332
ZNF808	16.9275	20.9255	25.7524	26.9274
ZNF813	9.27071	12.456	12.6339	9.53646
ZNF814	7.80751	6.60336	11.4154	13.4782
ZNF821	1.74293	1.6843	3.27815	4.57967
ZNF823	12.4334	15.1722	21.4839	10.4598
ZNF827	7.10214	7.31343	10.1207	12.1468
ZNF829	4.16448	13.1741	14.167	12.6824
ZNF83	9.0709	14.4495	17.7294	14.6733
ZNF830	18.0907	14.3377	21.6806	27.7449
ZNF835	8.45404	8.3569	4.7862	3.32527
ZNF836	6.96387	8.49086	8.7265	3.13469
ZNF837	6.52067	6.53468	1.5748	1.32859
ZNF839	6.36436	5.2391	3.87215	3.9131
ZNF84	11.6296	19.3808	23.8831	16.24
ZNF841	14.3715	17.6727	24.4421	25.1189
ZNF843	0.263665	0.16725	0.16186	0.351664
ZNF844	10.8005	9.64467	8.14448	11.76
ZNF845	11.6007	27.941	23.6283	32.0211
ZNF846	1.34993	1.13923	1.45002	1.53006
ZNF85	7.10538	16.394	16.941	12.7044
ZNF860	1.95915	2.77065	2.1513	2.36536
ZNF878	33.1267	28.2717	21.5097	21.5215
ZNF879	4.98671	7.37829	6.69461	5.65443
ZNF880	31.713	37.2514	28.4301	21.0504
ZNF883	1.32611	3.71266	2.628	1.3951
ZNF90	28.0317	73.5594	70.6511	79.3179
ZNF91	6.4174	20.3698	26.9182	18.4521
ZNF92	10.6313	44.2329	56.3309	43.6121
ZNF93	21.0903	36.221	29.9975	26.3572
ZNF98	11.7956	35.9441	30.0096	21.7148
ZNF99	3.27253	10.7463	12.1368	15.4946
ZNFX1	13.3119	11.4927	18.1913	50.8454
ZNHIT1	60.3236	63.2219	41.1349	50.1472
ZNHIT2	27.3829	23.6921	23.7268	19.2898
ZNHIT3	16.2102	16.4331	13.3772	11.5682
ZNHIT6	16.3399	23.7299	19.536	38.1757
ZNRD1	6.63572	5.37489	6.122	5.04717
ZNRF1	12.3789	10.9382	10.6207	12.7808
ZNRF2	6.18015	7.18422	10.0373	4.74501
ZNRF3	46.9621	43.5834	34.8336	20.8053
ZRANB1	13.697	10.9209	15.9593	21.4863
ZRANB2	32.6544	41.3033	61.5755	62.1366
ZRANB3	2.6174	3.00941	3.72098	1.85518
ZRSR2	17.3073	20.231	12.3684	19.5368
ZSCAN10	180.041	181.209	119.591	101.303
ZSCAN12	7.09822	7.39202	9.55933	6.34001
ZSCAN16	5.28795	4.87827	5.30939	3.22943
ZSCAN18	6.45757	6.46858	6.46242	4.21965
ZSCAN2	2.4501	3.28904	3.44382	3.11746
ZSCAN20	2.00725	2.11102	1.56787	2.29073
ZSCAN21	16.235	13.9828	14.7818	14.1623
ZSCAN22	5.89251	5.08894	4.64532	5.04779
ZSCAN29	18.2111	17.0826	16.7847	13.9511
ZSCAN4	2.22454	17.325	6.01477	79.906
ZSCAN5A	5.99289	5.24284	3.3328	2.94475
ZSCAN5B	0.449965	0.989473	0.751468	11.9265
ZSWIM3	13.7169	10.6416	19.7496	16.1814
ZSWIM4	1.06153	1.37789	1.47256	1.7091
ZSWIM6	16.001	17.6992	20.4075	28.0398
ZSWIM7	20.7091	18.0127	25.7367	17.2856
ZXDC	19.9732	21.6825	22.1962	16.9666
ZZEF1	23.0162	24.0192	21.4341	27.6995
KLF1	0.690114	0.316158	0.557208	0.80806
KLF10	7.66205	7.7646	9.33592	18.2764
KLF11	58.4443	55.7393	57.7514	31.075
KLF12	0.610697	1.1191	1.20574	1.43667
KLF13	49.1783	41.8636	33.9451	28.0474
